# Supplementary material for: Regulation of circadian clock transcriptional output by CLOCK:BMAL1
Source: PLoS Genet. 2018 Jan 4;14(1):e1007156. doi: 10.1371/journal.pgen.1007156 (PMC5771620; doi:10.1371/journal.pgen.1007156)
Supplement: S3 Table — This table contains the ChIP-Seq signal for several TFs at the 1,274 CLOCK:BMAL1 peaks that were assigned to a CLOCK:BMAL1 transcriptional output category used in this study. (XLSX) [file pgen.1007156.s018.xlsx]

## Sheet: Sheet1
Peak_ID	Output_ID	Output_ID_Rank	Location	phase_CLOKK	CLOCK_Signal	Phase_BMAL1	BMAL1_Signal	Phase_Nascent	Expre_Nascent	symbol_GeneID	Nasc_ZT00_1	Nasc_ZT04_1	Nasc_ZT08_1	Nasc_ZT12_1	Nasc_ZT16_1	Nasc_ZT20_1	Nasc_ZT00_2	Nasc_ZT04_2	Nasc_ZT08_2	Nasc_ZT12_2	Nasc_ZT16_2	Nasc_ZT20_2	RNA_ZT00_1	RNA_ZT04_1	RNA_ZT08_1	RNA_ZT12_1	RNA_ZT16_1	RNA_ZT20_1	RNA_ZT00_2	RNA_ZT04_2	RNA_ZT08_2	RNA_ZT12_2	RNA_ZT16_2	RNA_ZT20_2	RNA_Phase	BMAL1_CT00	BMAL1_CT04	BMAL1_CT08	BMAL1_CT12	BMAL1_CT16	BMAL1_CT20	CLOCK_CT00	CLOCK_CT04	CLOCK_CT08	CLOCK_CT12	CLOCK_CT16	CLOCK_CT20	PER1_CT00	PER1_CT04
Koike_CLKBMAL1_P0001	RIP_Phase141	1_RIP001	TSS	7.46965	268.487	4.49828	127.156	8.38451	15.2722	Dbp	2.273	23.16	50.503	18.512	3.734	3.085	3.61	6.227	42.623	22.651	3.849	3.04	0.494	48.216	25.025	3.994	1.726	0.369	0.948	60.335	21.944	5.016	1.013	0.6	7.35715	176.293	166.388	115.292	86.7304	60.84	25.8059	207.296	197.77	250.017	297.306	59.9199	142.466	174.196	142.998
Koike_CLKBMAL1_P0003	RIP_Phase073	1_RIP002	intergenic-10kbless	6.65046	242.276	4.09665	168.802	6.21504	15.5432	Nr1d1	6.339	37.607	40.574	9.35	0.985	2.162	11.902	30.617	28.296	15.073	2.251	1.362	11.499	35.43	5.161	0.945	1.021	2.627	10.622	27.091	5.844	1.649	0.955	3.626	5.33439	151.051	171.921	101.164	70.5793	33.4992	11.4539	87.1771	265.699	210.07	184.013	25.2496	59.935	266.308	106.043
Koike_CLKBMAL1_P0004	RIP_Phase185	1_RIP003	TSS	7.13482	296.015	3.66224	138.48	11.2002	3.79886	Gm129	1.269	1.557	4.402	8.471	1.038	1.843	1.334	0.961	5.258	16.62	2.097	0.738	0.059	3.384	4.401	1.703	0.485	0.112	0	3.593	3.667	1.634	0.16	0.468	9.19053	158.63	146.426	99.5806	62.5878	40.9435	13.1025	164.435	223.229	240.725	276.984	46.1952	81.9699	104.517	45.6767
Koike_CLKBMAL1_P0005	RIP_Phase142	1_RIP004	intron	6.69834	149.591	3.64779	143.962	8.38451	15.2722	Dbp	2.273	23.16	50.503	18.512	3.734	3.085	3.61	6.227	42.623	22.651	3.849	3.04	0.494	48.216	25.025	3.994	1.726	0.369	0.948	60.335	21.944	5.016	1.013	0.6	7.35715	138.196	130.442	75.9788	57.117	37.2214	13.172	79.3511	114.565	132.173	119.288	26.2538	42.307	87.0978	86.7627
Koike_CLKBMAL1_P0007	RIP_Phase074	1_RIP005	TSS	6.13865	201.039	2.98121	136.437	6.21504	15.5432	Nr1d1	6.339	37.607	40.574	9.35	0.985	2.162	11.902	30.617	28.296	15.073	2.251	1.362	11.499	35.43	5.161	0.945	1.021	2.627	10.622	27.091	5.844	1.649	0.955	3.626	5.33439	182.637	149.613	95.581	66.9943	42.4324	15.0983	142.959	267.203	212.588	225.062	64.9411	104.005	313.552	242.385
Koike_CLKBMAL1_P0009	RIP_Phase200	1_RIP006	intron	6.68219	122.033	4.20141	98.4721	11.9278	12.9573	Cry2	6.744	13.71	14.828	21.189	12.869	12.805	9.398	11.288	10.132	18.747	11.267	12.511	4.386	9.204	7.749	8.322	7.05	4.697	3.724	8.731	7.524	7.1	9.131	4.962	11.6919	98.0628	99.462	63.475	43.9347	17.8663	8.01771	69.0683	99.2899	137.905	93.8861	12.6248	21.1535	60.9685	60.5962
Koike_CLKBMAL1_P0010	RIP_Phase075	1_RIP007	intron	5.59959	162.909	2.68955	127.619	6.21504	15.5432	Nr1d1	6.339	37.607	40.574	9.35	0.985	2.162	11.902	30.617	28.296	15.073	2.251	1.362	11.499	35.43	5.161	0.945	1.021	2.627	10.622	27.091	5.844	1.649	0.955	3.626	5.33439	164.707	105.935	62.7788	61.0194	41.4849	15.2718	166.619	150.671	131.565	172.734	26.3973	87.6589	165.486	68.1707
Koike_CLKBMAL1_P0011	RIP_Phase076	1_RIP008	intron	4.94708	156.616	3.03259	87.3635	6.21504	15.5432	Nr1d1	6.339	37.607	40.574	9.35	0.985	2.162	11.902	30.617	28.296	15.073	2.251	1.362	11.499	35.43	5.161	0.945	1.021	2.627	10.622	27.091	5.844	1.649	0.955	3.626	5.33439	118.163	77.0793	53.4964	42.609	37.1537	11.2977	159.339	136.553	138.339	144.893	37.6353	56.9703	67.8308	53.0217
Koike_CLKBMAL1_P0015	RIP_Phase062	1_RIP009	intron	6.25605	218.506	4.145	113.806	5.54754	5.81457	Phf17	5.187	8.578	9.219	5.355	4.31	4.73	5.756	7.387	6.579	5.47	2.414	4.79	5.568	10.575	5.289	4.479	5.351	6.505	5.707	10.14	4.979	4.543	6.139	5.975	4.4869	95.8592	90.4941	68.0206	42.0115	18.8137	8.59041	120.119	164.442	183.583	124.064	20.1805	29.0861	78.3881	45.4472
Koike_CLKBMAL1_P0018	RIP_Phase143	1_RIP010	intron	8.25691	159.947	5.43326	101.802	8.38451	15.2722	Dbp	2.273	23.16	50.503	18.512	3.734	3.085	3.61	6.227	42.623	22.651	3.849	3.04	0.494	48.216	25.025	3.994	1.726	0.369	0.948	60.335	21.944	5.016	1.013	0.6	7.35715	58.6307	94.5457	61.8915	49.1628	25.3331	8.57305	45.0445	103.109	142.681	122.336	37.9222	24.7592	17.4196	7.57453
Koike_CLKBMAL1_P0021	RIP_Phase016	1_RIP011	TSS	3.81971	190.796	2.7429	108.173	3.30427	8.96818	Tbcel	9.652	13.792	14.303	4.937	5.19	10.99	10.347	8.083	10.981	6.007	3.897	9.438	11.596	19.978	11.647	11.739	10.967	14.147	12.151	19.94	13.802	10.068	12.11	10.17	5.85463	124.874	100.03	46.9578	14.732	5.95542	5.25837	141.139	160.738	123.228	33.5307	12.6248	31.7303	60.9685	30.2981
Koike_CLKBMAL1_P0027	RIP_Phase201	1_RIP012	TSS	5.83628	67.8689	2.49009	64.6895	11.9278	12.9573	Cry2	6.744	13.71	14.828	21.189	12.869	12.805	9.398	11.288	10.132	18.747	11.267	12.511	4.386	9.204	7.749	8.322	7.05	4.697	3.724	8.731	7.524	7.1	9.131	4.962	11.6919	88.7808	60.7247	39.491	25.655	26.055	10.1523	49.7765	61.1015	80.2417	53.6492	22.0934	60.8164	43.549	22.7236
Koike_CLKBMAL1_P0028	RIP_Phase145	1_RIP013	intron	6.09261	211.645	5.14391	88.9799	8.42251	16.3578	Tenc1	10.501	26.088	20.917	19.707	11.256	10.691	12.889	19.781	13.451	30.209	13.224	7.579	5.424	10.446	4.695	3.157	3.448	3.369	5.038	8.383	5.154	4.259	4.093	4.009	5.86464	63.9061	76.1652	62.7378	46.5114	26.258	8.59041	119.482	174.509	173.597	131.176	41.0306	42.307	43.549	75.7452
Koike_CLKBMAL1_P0030	RIP_Phase147	1_RIP014	intron	5.74341	59.2157	2.84502	73.571	8.54696	6.16061	Nr1d2	2.157	7.43	11.354	7.633	1.845	0.842	3.41	5.683	17.02	9.489	5.476	1.59	6.507	23.896	19.692	9.13	3.759	3.363	8.322	25.842	20.765	11.38	4.008	4.794	8.05021	82.6372	72.3854	31.0277	30.1923	28.2882	10.8812	39.0386	42.0073	57.3155	30.1777	7.89049	13.2209	52.2588	45.4472
Koike_CLKBMAL1_P0034	RIP_Phase100	1_RIP015	intergenic-10kbless	6.48385	202.649	3.68698	93.6176	7.14227	41.2242	Inmt	4.402	74.669	112.457	26.169	16.102	29.706	19.379	34.412	121.5	24.741	3.851	27.303	80.443	636.913	718.559	417.349	433.265	246.884	73.132	598.617	673.884	503.143	456.283	232.699	10.9289	78.2299	75.0041	52.0358	33.0864	22.3328	14.3173	114.113	114.565	177.678	93.8861	45.7649	39.6628	52.2587	90.8943
Koike_CLKBMAL1_P0036	RIP_Phase025	1_RIP016	intergenic-10kbless	6.29196	239.396	4.68024	93.3799	3.90943	4.38865	Dcun1d4	4.201	6.212	6.24	2.696	2.911	4.007	6.51	5.201	5.8	3.335	1.892	3.658	8.89	12.423	9.126	8.565	7.158	9.048	10.147	14.319	10.84	7.689	6.509	8.334	5.95823	62.2367	84.7872	49.9609	37.3435	17.8663	7.30618	126.125	174.047	166.215	149.669	29.5057	26.0413	26.1294	80.5654
Koike_CLKBMAL1_P0038	RIP_Phase077	1_RIP017	TSS	5.62794	145.214	4.24579	68.3447	6.21504	15.5432	Nr1d1	6.339	37.607	40.574	9.35	0.985	2.162	11.902	30.617	28.296	15.073	2.251	1.362	11.499	35.43	5.161	0.945	1.021	2.627	10.622	27.091	5.844	1.649	0.955	3.626	5.33439	108.079	113.618	80.9886	45.3164	11.2566	8.52099	143.505	246.952	215.02	150.888	41.0306	70.9925	265.253	185.461
Koike_CLKBMAL1_P0050	RIP_Phase059	1_RIP018	intron	4.00772	224.125	4.36321	76.7709	5.38482	19.3076	Nr3c2	19.216	25.874	28.638	17.821	11.114	15.888	22.242	18.382	30.069	12.074	15.497	14.876	2.657	3.671	2.229	1.63	2.096	2.043	2.518	3.761	2.295	1.669	2.191	2.273	4.73103	60.6006	83.9226	43.8046	30.0802	17.1218	6.94174	171.169	201.704	114.631	87.1799	32.2793	37.0187	113.227	75.7453
Koike_CLKBMAL1_P0059	RIP_Phase056	1_RIP019	3' UTR	5.08798	86.9964	2.7401	61.1781	5.32119	6.80878	Gnat1	5.789	8.703	11.914	3.251	5.483	5.488	6.997	12.846	9.074	5.767	3.332	3.061	10.112	13.168	6.429	3.6	2.612	3.001	6.345	12.48	7.726	4.852	3.241	6.554	5.57022	83.739	69.322	35.1911	13.313	8.77522	5.15424	64.4273	115.491	85.9733	37.8999	12.6248	39.6628	32.9916	36.0364
Koike_CLKBMAL1_P0063	RIP_Phase173	1_RIP020	intron	3.10527	55.719	2.92855	52.35	10.1473	24.0113	Tef	5.651	20.06	46.921	42.662	17.313	11.587	9.44	9.899	49.739	46.654	17.882	10.328	4.165	31.918	32.304	22.438	16.71	6.285	4.665	35.616	28.405	22.711	13.482	5.902	9.96035	66.7108	64.7021	32.693	22.9289	21.5884	11.7663	66.0653	85.9818	40.034	75.2918	11.1423	44.9512	46.7162	20.1987
Koike_CLKBMAL1_P0070	RIP_Phase176	1_RIP021	TSS	6.91406	139.697	6.47092	65.3882	10.1537	51.1021	Upp2	3.26	47.122	88.315	132.586	7.212	18.806	5.386	33.39	98.152	113.54	37.646	27.809	16.19	81.098	173.374	56.08	25.375	9.591	11.789	79.079	84.369	63.195	29.004	11.496	9.85695	30.8512	64.1092	56.7589	39.7149	14.1441	5.60546	64.0633	126.832	130.089	107.298	31.275	23.7977	95.8077	98.4688
Koike_CLKBMAL1_P0072	RIP_Phase078	1_RIP022	intron	4.65017	84.0684	3.35777	67.3281	6.21504	15.5432	Nr1d1	6.339	37.607	40.574	9.35	0.985	2.162	11.902	30.617	28.296	15.073	2.251	1.362	11.499	35.43	5.161	0.945	1.021	2.627	10.622	27.091	5.844	1.649	0.955	3.626	5.33439	79.3317	52.572	34.1127	33.2171	9.67755	4.40801	67.6123	87.8333	68.7786	46.943	15.781	18.5093	87.098	53.0217
Koike_CLKBMAL1_P0096	RIP_Phase036	1_RIP023	intron	4.67001	139.508	3.74331	63.5501	4.53219	74.6252	Uox	57.385	102.503	107.173	63.298	35.385	79.695	81.031	141.728	98.903	50.611	14.481	63.31	352.45	977.949	885.024	571.124	605.108	519.974	370.87	965.103	826.468	657.606	531.029	453.677	9.29272	63.9061	73.9665	44.5963	21.9207	13.3997	5.15424	93.092	145.116	95.5259	70.4146	26.732	44.9512	148.066	151.49
Koike_CLKBMAL1_P0098	RIP_Phase174	1_RIP024	intron	4.93391	107.385	3.08631	50.106	10.1473	24.0113	Tef	5.651	20.06	46.921	42.662	17.313	11.587	9.44	9.899	49.739	46.654	17.882	10.328	4.165	31.918	32.304	22.438	16.71	6.285	4.665	35.616	28.405	22.711	13.482	5.902	9.96035	71.6857	65.888	37.4161	16.5432	18.8588	11.02	85.6301	89.8006	89.3601	90.2282	18.9372	55.3677	60.9686	15.1491
Koike_CLKBMAL1_P0105	RIP_Phase162	1_RIP025	intron	4.67608	138.524	3.61161	72.066	9.27323	5.61734	Ppargc1b	3.446	8.107	9.067	8.51	3.622	5.474	2.447	5.64	4.794	8.217	4.502	3.582	0.898	1.52	0.852	0.787	0.824	0.608	0.614	2.044	0.588	0.871	0.956	0.507	6.81885	59.4988	66.4315	37.3069	22.7982	8.93313	8.59041	108.107	68.7391	83.1075	69.8049	25.2496	29.0861	104.517	45.4471
Koike_CLKBMAL1_P0114	RIP_Phase118	1_RIP026	TSS	5.38315	66.4376	4.20769	53.8858	7.518	8.51064	Gstt2	2.273	10.778	29.473	5.741	3.469	6.567	2.584	11.455	13.092	9.864	1.474	5.358	5.391	22.456	21.807	9.373	10.079	7.759	4.038	27.933	18.551	24.633	13.165	5.311	9.84026	44.0732	57.8836	45.0467	11.091	11.9108	5.15424	33.0326	72.558	65.9129	20.1184	9.46859	7.93257	43.549	30.2981
Koike_CLKBMAL1_P0119	RIP_Phase128	1_RIP027	intron	8.33414	72.447	4.59032	44.7071	8.08207	53.8725	Ppara	31.863	64.285	101.894	46.282	45.964	39.188	44.577	48.05	79.432	80.78	19.376	44.78	18.71	50.368	39.751	33.257	37.645	29.47	18.154	57.312	50.953	31.451	34.993	26.331	9.64216	47.4454	46.4699	36.6926	27.1114	14.7983	7.47973	69.0683	38.6513	51.8445	97.2391	17.3591	44.9512	123.257	121.422
Koike_CLKBMAL1_P0125	RIP_Phase163	1_RIP028	intron	6.46518	144.744	5.7613	51.9938	9.27323	5.61734	Ppargc1b	3.446	8.107	9.067	8.51	3.622	5.474	2.447	5.64	4.794	8.217	4.502	3.582	0.898	1.52	0.852	0.787	0.824	0.608	0.614	2.044	0.588	0.871	0.956	0.507	6.81885	33.0549	40.1208	41.8798	26.8687	13.4899	8.98956	72.0712	106.928	83.1075	106.587	25.8712	47.5954	34.8392	30.2981
Koike_CLKBMAL1_P0134	RIP_Phase037	1_RIP029	intron	3.41927	76.4298	2.81936	68.1131	4.53219	74.6252	Uox	57.385	102.503	107.173	63.298	35.385	79.695	81.031	141.728	98.903	50.611	14.481	63.31	352.45	977.949	885.024	571.124	605.108	519.974	370.87	965.103	826.468	657.606	531.029	453.677	9.29272	77.896	73.3736	27.2192	10.1761	2.36863	2.25607	70.4332	68.7391	48.7182	20.1184	4.73429	20.4324	49.8834	37.8726
Koike_CLKBMAL1_P0136	RIP_Phase103	1_RIP030	intron	5.48355	99.0067	4.30981	49.9063	7.27005	15.284	Gys2	9.134	18.88	45.241	11.054	6.457	8.982	11.369	11.156	29.309	11.229	8.024	12.572	18.308	47.735	55.963	42.787	39.173	32.624	21.233	49.394	51.333	69.737	30.21	26.39	11.444	54.5906	68.9761	53.319	17.7195	4.71471	6.10873	79.2601	102.877	125.313	67.0615	15.781	19.0702	71.7898	119.356
Koike_CLKBMAL1_P0153	RIP_Phase125	1_RIP031	TSS	5.78409	114.065	3.35486	45.4694	7.93689	6.65712	Ypel5	4.503	6.884	9.571	7.034	4.707	5.543	5.514	7.642	9.295	7.638	4.945	6.609	10.043	16.325	13.15	13.201	13.427	11.921	10.896	15.389	15.422	9.687	11.756	9.996	8.66584	45.175	35.2539	22.5234	17.2527	12.6553	3.10643	75.0742	61.1015	65.9129	77.1207	25.2496	39.6628	95.8077	68.1707
Koike_CLKBMAL1_P0160	RIP_Phase197	1_RIP032	intron	7.7879	122.984	4.42306	53.921	11.91	54.1765	Mtss1	32.688	49.27	61.159	74.958	67.715	40.515	35.566	34.624	68.101	84.793	76.644	24.086	9.699	23.464	28.942	21.866	18.025	12.599	12.979	23.966	21.35	24.228	12.308	12.712	10.4598	42.9714	42.3936	32.2153	25.3376	14.1441	8.01771	54.0534	83.3202	73.0339	103.945	20.85	31.7303	172.612	143.916
Koike_CLKBMAL1_P0161	RIP_Phase054	1_RIP033	TSS	4.12187	54.064	3.10127	48.6112	5.28502	14.9241	Prdx6	16.061	19.606	18.313	17.216	12.026	15.898	13.614	14.501	18.595	11.984	8.071	13.206	117.482	181.314	201.531	182.315	177.166	174.82	125.29	183.872	208.608	175.737	152.936	142.631	11.4984	55.392	43.8018	29.6216	12.9395	9.67755	5.15424	45.0445	26.7319	49.1524	13.4123	9.46859	18.5093	34.8392	30.2981
Koike_CLKBMAL1_P0170	RIP_Phase057	1_RIP034	3' UTR	5.53653	129.806	4.12689	54.3146	5.32119	6.80878	Gnat1	5.789	8.703	11.914	3.251	5.483	5.488	6.997	12.846	9.074	5.767	3.332	3.061	10.112	13.168	6.429	3.6	2.612	3.001	6.345	12.48	7.726	4.852	3.241	6.554	5.57022	46.8445	43.2583	33.4847	21.846	15.4976	5.32779	81.0801	89.4535	83.1075	75.9014	32.8053	41.2654	79.7078	68.1707
Koike_CLKBMAL1_P0220	RIP_Phase136	1_RIP035	intron	8.6683	76.6478	4.91456	51.7892	8.331	7.11509	Lima1	5.641	9.696	10.719	7.408	7.284	6.708	5.378	7.692	6.21	8.498	6.292	3.854	15.271	16.646	14.281	13.663	12.976	12.78	15.193	22.442	12.937	13.505	12.499	11.173	5.99393	39.6659	31.7952	35.9555	20.9497	13.1064	5.15424	42.0415	38.1884	45.7656	70.4146	12.6248	18.5093	17.4196	15.1491
Koike_CLKBMAL1_P0226	RIP_Phase155	1_RIP036	intron	4.36406	62.4857	3.79144	34.3333	9.06642	19.4827	Clmn	15.657	19.22	29.73	25.843	14.155	11.138	18.743	18.484	25.077	23.22	22.648	9.877	9.327	13.305	14.665	10.39	11.632	9.194	9.805	16.23	13.273	10.502	10.86	8.083	8.87359	41.8695	34.241	26.8096	18.4851	7.39916	2.86347	59.6044	49.6449	34.3893	63.7084	11.0467	39.6628	95.8077	53.7103
Koike_CLKBMAL1_P0234	RIP_Phase071	1_RIP037	TSS	8.00108	78.2014	5.84138	41.8734	6.15239	149.886	Abcc2	81.75	228.62	179.143	147.12	76.239	141.958	157.771	178.576	218.478	173.519	77.086	138.366	44.785	93.03	61.056	68.177	52.129	68.575	54.118	84.392	74.141	74.177	62.027	59.556	8.94305	22.0366	40.7631	36.6653	21.0244	6.54194	2.86347	42.0415	50.1078	74.5102	70.4146	14.2029	18.5093	34.8392	60.5962
Koike_CLKBMAL1_P0255	RIP_Phase019	1_RIP038	intron	4.56041	96.0498	4.09718	43.1094	3.38991	3.42359	Ppfibp1	3.622	5.366	4.363	1.265	2.192	2.806	4.87	6.263	3.607	2.462	1.751	2.518	4.024	4.632	2.6	2.566	2.928	3.636	3.437	4.502	2.965	2.379	3.005	3.304	3.21469	40.7343	39.9972	25.3217	19.8668	10.422	2.86347	60.0593	72.558	59.8339	57.0023	23.6715	40.2237	69.6783	53.0217
Koike_CLKBMAL1_P0262	RIP_Phase146	1_RIP039	intron	4.31316	77.9184	5.67697	43.9818	8.47282	4.96735	Tbc1d10a	3.611	6.183	10.008	6.622	5.369	4.257	4.259	4.219	4.569	5.443	2.43	2.638	2.401	5.727	2.724	2.204	1.726	1.958	2.077	3.78	2.452	2.003	2.087	2.337	6.32107	27.2119	33.4257	37.3888	16.6366	21.3628	4.54684	57.0564	53.4638	57.3155	36.8838	12.6248	23.7977	17.4196	30.2981
Koike_CLKBMAL1_P0267	RIP_Phase009	1_RIP040	intergenic-10kbless	4.88863	78.3485	3.54327	43.3072	3.04059	8.35616	Sgk2	6.104	13.929	10.652	3.111	4.102	13.136	10.837	17.182	8.115	5.746	1.019	6.34	9.776	16.181	4.481	3.728	6.342	6.147	9.078	15.71	6.619	6.329	8.683	8.338	4.1116	37.4622	37.502	21.7453	14.1719	16.3774	4.07827	57.0564	64.9203	54.4497	40.2369	11.0467	18.5093	60.9686	60.5962
Koike_CLKBMAL1_P0268	RIP_Phase182	1_RIP041	TSS	6.13319	97.4716	4.98977	29.946	11.0345	12.2555	Ngef	5.671	12.968	16.086	21.028	9.252	11.176	7.569	10.173	13.275	16.397	14.243	9.23	4.449	8.162	10.244	7.068	6.903	4.87	3.767	9.619	9.418	7.647	6.304	4.965	10.4129	34.958	31.6717	29.7309	20.3522	7.87288	3.43616	75.0742	60.06	93.1811	60.3553	20.5153	31.7303	34.8391	37.8726
Koike_CLKBMAL1_P0269	RIP_Phase099	1_RIP042	intergenic-10kbless	6.80222	92.9547	3.80143	45.2691	7.13111	36.4382	Fads2	22.211	43.887	47.157	38.005	22.445	33.107	32.948	43.449	73.963	34.986	21.641	23.459	23.692	58.597	53.998	42.701	48.723	48.925	23.067	57.479	73.257	47.947	40.673	29.109	10.6668	44.7076	30.98	28.9801	20.3336	8.1887	6.29963	30.0297	64.9203	70.6891	53.6492	14.2029	18.5093	26.1294	38.5612
Koike_CLKBMAL1_P0280	RIP_Phase032	1_RIP043	intron	5.14378	49.902	2.53829	53.951	4.2741	17.8978	Cyp2c44	12.732	36.577	23.877	13.617	8.443	12.748	19.229	41.364	18.913	8.403	5.198	13.672	55.381	104.722	119.754	83.654	96.663	77.325	45.602	113.223	93.766	123.33	95.15	69.123	11.8302	70.5171	42.3936	30.9184	5.54552	3.72214	2.86347	30.0297	49.6449	45.8524	23.4715	8.84691	11.8588	34.3113	30.2981
Koike_CLKBMAL1_P0283	RIP_Phase053	1_RIP044	intergenic-10kbless	6.13761	63.863	4.55993	40.0906	5.21717	165.712	Slc38a3	167.066	236.299	253.644	148.771	81.491	117.201	206.373	258.59	195.065	153.186	94.518	76.338	252.327	439.21	420.858	232.982	174.505	166.139	213.433	434.806	374.177	281.298	185.955	187.899	8.05655	28.6476	35.328	29.1029	12.9395	8.41428	4.00886	33.0326	38.1884	65.9129	23.4715	7.89049	10.5768	26.1294	22.7236
Koike_CLKBMAL1_P0299	RIP_Phase186	1_RIP045	TSS	10.128	38.9512	4.81548	35.8698	11.2002	3.79886	Gm129	1.269	1.557	4.402	8.471	1.038	1.843	1.334	0.961	5.258	16.62	2.097	0.738	0.059	3.384	4.401	1.703	0.485	0.112	0	3.593	3.667	1.634	0.16	0.468	9.19053	62.604	67.9385	67.7612	36.7087	10.422	3.78325	27.5727	44.6689	81.197	97.544	20.8978	31.4899	35.6309	37.8726
Koike_CLKBMAL1_P0306	RIP_Phase085	1_RIP046	TSS	7.73436	33.6621	6.99702	13.1222	6.38155	4.34837	Anxa7	4.051	4.825	6.798	3.523	3.073	4.107	4.596	3.752	6.628	4.38	2.787	3.66	10.457	17.138	15.859	12.721	10.789	11.467	11.311	18.998	19.739	12.993	10.533	11.563	8.45259	15.4256	22.0121	30.1813	16.0204	5.95542	1.71808	12.0119	53.4638	48.7182	53.6492	4.73429	7.93257	26.1294	22.7236
Koike_CLKBMAL1_P0310	RIP_Phase106	1_RIP047	intron	6.79185	55.6913	6.14456	48.0187	7.32214	10.9873	Ammecr1l	8.902	10.73	13.956	10.823	9.533	11.014	11.236	11.584	14.015	11.714	8.243	10.097	8.138	10.599	11.048	11.603	10.058	9.571	8.988	10.506	9.136	10.004	10.079	7.594	11.8607	22.0366	43.2089	35.0136	23.4144	14.8434	7.60121	23.2957	38.1884	70.3418	23.6747	9.46859	10.5768	26.1294	22.7236
Koike_CLKBMAL1_P0314	RIP_Phase107	1_RIP048	3' UTR	7.12162	121.429	4.27745	44.3373	7.3995	56.7365	A730008H23Rik	38.568	70.333	87.431	60.945	48.601	48.831	60.265	47.631	78.67	63.11	25.664	50.787	13.435	29.901	15.223	9.44	11.727	14.751	9.4	26.782	14.682	11.354	14.72	7.595	6.51779	37.9296	48.2734	30.7546	18.4851	18.0918	7.46237	72.0712	87.8333	94.5706	87.1799	32.6619	23.7977	60.9685	53.0217
Koike_CLKBMAL1_P0324	RIP_Phase137	1_RIP049	intron	5.04858	70.7376	3.34183	44.3374	8.331	7.11509	Lima1	5.641	9.696	10.719	7.408	7.284	6.708	5.378	7.692	6.21	8.498	6.292	3.854	15.271	16.646	14.281	13.663	12.976	12.78	15.193	22.442	12.937	13.505	12.499	11.173	5.99393	41.8695	44.0241	25.6766	6.92723	11.9108	2.46432	44.3165	60.6386	34.3893	43.59	13.7247	14.2626	34.8392	30.2981
Koike_CLKBMAL1_P0337	RIP_Phase134	1_RIP050	TSS	7.85845	41.1888	4.44435	25.328	8.18695	10.6232	1810013L24Rik	9.524	12.117	13.862	11.934	8.878	8.62	10.556	10.825	10.353	11.991	10.85	7.968	7.949	8.243	5.582	5.692	6.637	7.129	8.202	8.992	6.407	5.638	6.405	6.225	3.19078	36.5273	39.1326	25.1579	23.4331	8.93313	0.95449	21.0208	42.0073	80.2417	47.1463	7.98613	10.5768	60.9686	68.1707
Koike_CLKBMAL1_P0344	RIP_Phase051	1_RIP051	TSS	4.10211	132.104	6.22528	39.3696	5.09636	6.33305	Arsa	4.044	12.35	11.211	4.308	2.908	4.911	9.066	8.714	6.238	6.417	2.917	2.912	5.156	16.388	9.149	5.471	5.853	6.974	6.21	16.334	12.743	6.816	7.191	5.351	7.3819	27.5457	24.4579	27.8061	21.902	11.1664	4.61626	75.0742	110.746	71.6444	50.2961	22.0934	42.307	8.7098	45.4472
Koike_CLKBMAL1_P0353	RIP_Phase043	1_RIP052	3' UTR	4.55353	19.6423	4.10955	19.3196	4.83341	7.02572	Klhdc7a	8.923	11.586	15.756	3.422	4.222	2.896	10.45	8.223	7.17	4.854	4.412	2.394	8.385	8.022	3.263	3.702	3.252	4.172	6.634	9.805	4.903	3.693	2.92	5.325	4.15651	37.8963	57.513	29.6626	19.0826	5.45913	3.90473	62.2433	66.0775	49.3261	30.4825	11.5727	21.5542	60.9686	61.5143
Koike_CLKBMAL1_P0373	RIP_Phase167	1_RIP053	intron	6.30821	69.2885	4.84415	34.9173	9.52322	5.94312	Lrp4	3.091	7.296	12.1	6.706	4.551	3.291	3.524	3.729	7.377	11.847	4.087	3.718	1.023	2.999	3.607	2.973	2.297	1.896	1.178	3.749	3.431	3.254	2.05	1.663	10.7917	25.3421	34.5622	28.1337	12.9395	7.76009	4.00886	42.0415	49.6449	85.7128	37.1886	15.781	7.93257	52.2588	53.0217
Koike_CLKBMAL1_P0376	RIP_Phase152	1_RIP054	TSS	6.24089	61.1454	4.59076	34.8312	8.8274	146.737	Slc27a2	81.098	143.485	198.849	240.347	64.418	109.027	124.07	175.656	208.976	183.528	129.787	101.604	268.189	343.897	335.13	269.636	307.441	286.284	283.036	354.116	331.447	325.769	286.052	284.956	8.8589	28.6476	27.8671	22.0729	13.5557	11.4597	1.14539	42.0415	34.3696	51.584	36.8838	12.6248	23.7977	43.549	22.7236
Koike_CLKBMAL1_P0411	RIP_Phase168	1_RIP055	intron	6.31672	109.354	6.54884	43.4453	9.63229	20.2252	Stard5	12.719	17.847	29.821	31.427	17	15.145	14.32	22.245	24.464	27.967	13.911	15.838	26.395	39.283	49.998	50.806	35.022	32.17	26.665	37.174	45.944	39.7	31.179	29.89	11.4793	23.9731	34.4386	34.14	22.2194	18.6107	2.86347	63.0623	84.0145	71.6444	74.9869	26.8277	31.7303	69.6783	7.57453
Koike_CLKBMAL1_P0428	RIP_Phase198	1_RIP056	intron	7.89363	41.7953	7.14344	28.8179	11.91	54.1765	Mtss1	32.688	49.27	61.159	74.958	67.715	40.515	35.566	34.624	68.101	84.793	76.644	24.086	9.699	23.464	28.942	21.866	18.025	12.599	12.979	23.966	21.35	24.228	12.308	12.712	10.4598	16.5274	25.6437	35.0682	26.7193	8.1887	4.33859	18.0178	34.3696	48.5445	43.59	12.5291	7.93257	8.7098	0
Koike_CLKBMAL1_P0431	RIP_Phase003	1_RIP057	TSS	5.95104	50.9184	5.2427	32.1851	2.19906	13.5492	Pdcd4	14.497	14.503	11.077	10.887	10.209	14.647	19.742	20.709	13.543	12.221	9.68	10.874	26.475	28.561	23.844	20.287	21.331	24.049	21.96	26.184	20.1	22.246	26.587	22.228	3.35798	20.9348	24.4579	26.482	15.983	9.02336	6.40376	27.0267	38.1884	45.8524	36.8838	6.93407	14.8235	17.4196	37.8726
Koike_CLKBMAL1_P0436	RIP_Phase063	1_RIP058	intron	5.11758	37.1214	2.33771	39.218	5.54754	5.81457	Phf17	5.187	8.578	9.219	5.355	4.31	4.73	5.756	7.387	6.579	5.47	2.414	4.79	5.568	10.575	5.289	4.479	5.351	6.505	5.707	10.14	4.979	4.543	6.139	5.975	4.4869	50.6842	30.98	17.1997	4.31318	2.97771	1.02391	20.0198	42.123	17.1947	20.1184	1.5781	0	26.1294	30.2981
Koike_CLKBMAL1_P0462	RIP_Phase191	1_RIP059	intron	7.0301	50.4839	5.64999	21.5673	11.3329	20.799	Por	3.454	16.189	26.304	59.215	9.55	5.892	4.937	13.747	22.881	49.094	32.235	6.091	26.079	62.653	130.896	94.248	53.012	26.43	26.575	81.56	108.547	117.641	44.401	31.196	11.2582	18.7311	33.994	25.1579	15.7403	8.4594	1.82221	30.0297	49.6449	52.7998	57.0023	7.89049	7.93257	8.70978	30.2981
Koike_CLKBMAL1_P0486	RIP_Phase132	1_RIP060	TSS	6.48463	40.5174	4.976	18.2315	8.16675	6.42385	Pla2g6	5.314	6.087	9.453	5.637	6.603	4.953	6.261	6.466	9.323	7.362	5.051	4.576	4.708	12.776	8.14	6.115	9.594	5.855	6.844	9.896	11.74	13.113	10.198	7.292	11.2717	28.1801	23.4697	19.0015	15.3295	8.93313	1.71808	36.0356	30.5507	65.9129	53.6492	6.31239	17.7882	43.549	37.8726
Koike_CLKBMAL1_P0498	RIP_Phase109	1_RIP061	intron	4.1471	84.9359	6.06438	31.6282	7.42384	64.3947	Slc38a4	19.894	75.065	78.847	111.392	32.231	53.159	51.2	119.856	87.727	65.653	24.729	52.984	143.213	257.441	208.077	156.068	154.096	156.032	139.078	245.021	180.2	176.682	156.998	157.99	7.8656	19.8663	28.5342	35.2866	16.0204	8.1887	5.43191	60.0593	87.8333	63.0471	40.2369	14.2029	39.6628	69.6783	53.0217
Koike_CLKBMAL1_P0509	RIP_Phase022	1_RIP062	intergenic-10kbless	6.92755	61.5506	6.15051	44.0642	3.77719	33.1601	Anks4b	33.504	46.214	33.785	22.772	30.493	31.007	36.957	41.39	40.484	32.701	16.729	31.886	26.385	46.185	32.391	33.857	27.956	35.478	29.59	47.008	30.927	32.669	22.815	27.434	6.95033	26.4773	32.6105	32.8022	22.7982	14.1441	3.07172	30.0297	34.3696	58.4445	33.5307	4.73429	10.5768	26.1294	21.3464
Koike_CLKBMAL1_P0511	RIP_Phase045	1_RIP063	intergenic-10kbless	4.7879	54.811	5.01308	27.2995	4.83557	8.38154	Slc2a9	6.589	10.476	13.085	7.454	5.025	9.654	8.947	12.363	8.883	6.264	5.503	6.335	8.267	11.622	11.249	7.798	7.353	8.12	6.962	12.171	9.629	8.854	6.096	7.328	7.71143	22.0366	26.9036	25.1579	15.4602	0.744427	5.15424	27.0267	64.9203	41.2498	30.1777	11.0467	21.9548	26.1294	15.1491
Koike_CLKBMAL1_P0552	RIP_Phase052	1_RIP064	intron	6.17975	42.891	3.655	30.9266	5.09636	6.33305	Arsa	4.044	12.35	11.211	4.308	2.908	4.911	9.066	8.714	6.238	6.417	2.917	2.912	5.156	16.388	9.149	5.471	5.853	6.974	6.21	16.334	12.743	6.816	7.191	5.351	7.3819	25.075	34.241	17.5682	6.77785	3.72214	2.86347	27.6637	38.1884	34.3893	31.6002	7.89049	10.5768	34.8392	15.149
Koike_CLKBMAL1_P0587	RIP_Phase005	1_RIP065	intron	4.75246	72.2417	4.14975	34.1374	2.4843	16.3692	AK144477	19.47	24.043	18.092	10.063	2.546	15.752	26.183	32.191	20.838	2.259	2.038	22.956	3.607	4.263	6.645	6.189	2.575	6.357	2.479	3.617	4.306	4.459	2.723	3.677	11.3937	23.1384	26.1378	16.2168	13.5557	7.44427	5.15424	59.9684	49.6449	33.5209	48.6704	11.5249	13.2209	52.2587	37.8726
Koike_CLKBMAL1_P0597	RIP_Phase067	1_RIP066	intron	5.40653	85.7611	4.47608	32.7114	5.74555	7.04638	Cd47	6.239	9.758	9.312	6.492	6.16	6.828	6.214	7.498	6.895	6.889	5.592	6.679	13.332	11.533	16.572	14.748	10.498	16.288	12.523	12.907	11.178	16.269	15.954	15.72	17.5571	29.7494	26.9036	21.172	19.1012	10.422	6.29963	72.0712	42.0073	62.1787	60.3553	17.3591	26.4419	130.647	68.1707
Koike_CLKBMAL1_P0605	RIP_Phase180	1_RIP067	intron	9.33572	46.4623	6.39748	28.5417	10.9539	8.00616	Nrg4	3.38	4.129	13.186	14.07	4.703	4.155	3.025	3.57	14.693	16.944	10.676	3.542	1.627	2.155	3.253	2.621	1.424	1.269	0.992	2.674	3.349	1.819	1.348	1.325	9.86878	18.7311	21.1968	27.6423	17.7195	8.1887	5.72694	27.0267	19.0942	45.8524	60.4569	12.6726	7.93257	43.549	30.2981
Koike_CLKBMAL1_P0625	RIP_Phase079	1_RIP068	intron	4.57846	63.4961	3.43334	31.1222	6.28696	7.72518	D930015E06Rik	6.825	9.341	10.522	8.584	4.863	7.035	8.14	8.111	9.751	7.496	5.477	6.558	1.313	2.743	2.974	2.812	2.015	2.147	1.515	3.028	2.749	2.708	2.213	1.474	10.8846	34.1233	28.8306	21.6361	11.2031	4.46656	4.3733	41.3136	49.6449	54.4497	26.8246	11.0467	23.7977	60.9686	22.7236
Koike_CLKBMAL1_P0638	RIP_Phase110	1_RIP069	intron	6.69274	73.8104	6.80151	36.8528	7.42384	64.3947	Slc38a4	19.894	75.065	78.847	111.392	32.231	53.159	51.2	119.856	87.727	65.653	24.729	52.984	143.213	257.441	208.077	156.068	154.096	156.032	139.078	245.021	180.2	176.682	156.998	157.99	7.8656	12.1201	32.6105	31.0823	20.5203	8.93313	4.00886	30.4847	49.6449	51.2366	48.0607	14.2029	13.2209	8.7098	15.1491
Koike_CLKBMAL1_P0658	RIP_Phase194	1_RIP070	intergenic-10kbless	5.26328	56.0981	4.33295	27.7846	11.7594	13.9144	Mknk2	6.05	9.394	15.638	33.079	8.993	13.251	9.158	9.642	12.766	27.189	9.744	12.069	6.587	27.726	28.906	19.698	17.367	10.269	7.387	23.982	39.877	24.791	12.931	8.436	10.3947	28.8479	22.0121	22.5234	12.9395	5.95542	2.70728	36.6726	66.8876	34.3893	43.59	5.02122	29.2463	41.9654	30.2981
Koike_CLKBMAL1_P0660	RIP_Phase104	1_RIP071	intron	6.76171	45.2776	5.27595	32.9452	7.27005	15.284	Gys2	9.134	18.88	45.241	11.054	6.457	8.982	11.369	11.156	29.309	11.229	8.024	12.572	18.308	47.735	55.963	42.787	39.173	32.624	21.233	49.394	51.333	69.737	30.21	26.39	11.444	39.4989	64.381	49.0191	16.8793	5.21099	2.63786	53.1434	92.2308	116.455	65.4357	13.7725	20.833	69.6783	127.849
Koike_CLKBMAL1_P0668	RIP_Phase187	1_RIP072	TSS	9.09511	28.7667	8.17385	20.7251	11.2002	3.79886	Gm129	1.269	1.557	4.402	8.471	1.038	1.843	1.334	0.961	5.258	16.62	2.097	0.738	0.059	3.384	4.401	1.703	0.485	0.112	0	3.593	3.667	1.634	0.16	0.468	9.19053	18.9982	20.8509	36.3104	24.9455	3.88005	1.71808	15.0148	19.0942	54.4497	49.7881	7.89049	15.8651	26.1294	15.1491
Koike_CLKBMAL1_P0673	RIP_Phase044	1_RIP073	3' UTR	4.22998	73.5001	4.62716	25.8571	4.83341	7.02572	Klhdc7a	8.923	11.586	15.756	3.422	4.222	2.896	10.45	8.223	7.17	4.854	4.412	2.394	8.385	8.022	3.263	3.702	3.252	4.172	6.634	9.805	4.903	3.693	2.92	5.325	4.15651	36.5607	56.2284	29.1439	19.512	10.1738	3.43616	81.3531	105.539	64.8708	46.943	31.562	37.0187	54.6341	96.4031
Koike_CLKBMAL1_P0736	RIP_Phase091	1_RIP074	TSS	6.36216	53.9068	3.54063	25.8089	6.69467	7.49008	Pnpla7	7.73	8.355	9.387	10.108	4.542	5.65	8.356	8.513	7.566	9.229	4.583	5.863	14.494	13.244	9.634	9.044	8.794	12.946	13.833	12.817	11.59	8.146	8.99	11.719	2.92286	27.4122	22.8273	15.3159	12.3234	6.27124	1.71808	24.0237	42.0073	51.584	26.8246	4.73429	13.2209	17.4196	53.0217
Koike_CLKBMAL1_P0744	RIP_Phase183	1_RIP075	intron	3.42591	40.5039	4.86153	32.1446	11.0479	20.0061	Gne	7.375	16.489	26.189	40.845	15.457	14.114	12.313	19.902	17.755	37.02	15.429	17.186	30.241	22.109	30.53	24.822	19.98	16.933	29.46	23.16	27.69	31.493	18.981	24.504	8.35265	28.1801	25.2731	21.4313	16.0204	10.8506	5.57075	45.0445	45.8261	31.5235	20.1184	6.50368	18.5093	34.8392	22.7236
Koike_CLKBMAL1_P0748	RIP_Phase122	1_RIP076	intron	7.60147	70.6707	4.16566	31.604	7.82455	2.94943	Slc16a7	1.243	3.559	8.517	2.946	0.411	1.591	2.055	1.579	7.566	2.721	1.53	1.675	4.836	23.731	23.36	21.035	22.087	15.355	5.184	26.225	28.533	20.909	17.812	7.131	11.3729	30.0165	46.0746	24.6802	14.6947	8.1887	6.87233	31.0307	45.8261	87.797	55.8846	14.2029	16.3459	60.9686	7.57453
Koike_CLKBMAL1_P0758	RIP_Phase108	1_RIP077	intron	10.1498	65.8513	4.38575	27.7043	7.3995	56.7365	A730008H23Rik	38.568	70.333	87.431	60.945	48.601	48.831	60.265	47.631	78.67	63.11	25.664	50.787	13.435	29.901	15.223	9.44	11.727	14.751	9.4	26.782	14.682	11.354	14.72	7.595	6.51779	28.6476	29.3988	26.209	22.4995	15.6555	9.44077	36.3996	52.0751	38.2103	53.6492	28.4058	44.9512	78.3881	114.306
Koike_CLKBMAL1_P0762	RIP_Phase086	1_RIP078	intron	7.09287	51.5139	4.72229	24.3085	6.46076	18.6351	Insr	15.919	20.758	22.428	19.76	15.479	17.274	17.092	24.702	18.786	18.689	16.174	16.561	12.459	16.692	13.739	13.524	15.412	13.274	11.995	16.294	15.212	12.267	16.511	12.796	10.2218	21.7027	34.908	23.6837	10.2881	6.69985	5.74429	36.0356	58.0927	74.5102	46.943	9.46859	15.8651	8.7098	22.7236
Koike_CLKBMAL1_P0781	RIP_Phase105	1_RIP079	intron	7.30397	63.9477	5.46809	28.6394	7.27005	15.284	Gys2	9.134	18.88	45.241	11.054	6.457	8.982	11.369	11.156	29.309	11.229	8.024	12.572	18.308	47.735	55.963	42.787	39.173	32.624	21.233	49.394	51.333	69.737	30.21	26.39	11.444	22.0366	30.98	30.1813	15.4042	7.33148	5.15424	42.0415	58.0927	71.0365	63.7084	4.73429	10.0159	26.1294	48.6605
Koike_CLKBMAL1_P0785	RIP_Phase156	1_RIP080	intron	5.80178	40.1041	4.8251	27.3186	9.06642	19.4827	Clmn	15.657	19.22	29.73	25.843	14.155	11.138	18.743	18.484	25.077	23.22	22.648	9.877	9.327	13.305	14.665	10.39	11.632	9.194	9.805	16.23	13.273	10.502	10.86	8.083	8.87359	17.7962	25.2731	19.3701	9.8587	1.48885	3.43616	12.0119	38.1884	36.213	13.4123	8.3687	2.64419	17.4196	7.57453
Koike_CLKBMAL1_P0790	RIP_Phase205	1_RIP081	3' UTR	5.45885	64.1839	6.49868	22.2185	11.9719	8.95909	Tor1b	6.174	7.36	9.308	11.424	9.372	9.667	7.336	7.565	10.308	13.603	6.936	8.456	9.166	8.794	10.043	12.952	8.888	8.769	10.375	10.488	10.424	9.933	8.987	9.59	11.3675	16.5274	17.9358	14.647	16.0204	8.23382	3.43616	27.0267	64.9203	40.2945	34.4452	22.3325	37.0187	95.8077	60.5962
Koike_CLKBMAL1_P0797	RIP_Phase154	1_RIP082	intron	6.6917	63.7879	5.72147	24.5906	8.99812	10.8102	Ulk1	7.583	12.365	15.381	17.247	4.617	6.479	9.347	12.304	9.789	15.256	11.559	7.796	9.105	10.161	9.318	11.422	8.371	8.888	7.83	11.251	10.25	7.329	7.001	8.065	8.05274	13.1218	26.0884	16.2987	11.7072	8.48196	1.75279	33.0326	45.8261	57.3155	36.8838	11.0467	5.28838	17.4196	37.8726
Koike_CLKBMAL1_P0811	RIP_Phase026	1_RIP083	intergenic-10kbless	6.97869	39.5117	2.86244	21.5233	4.01811	5.91658	Bdh1	5.15	10.89	7.903	3.659	4.709	5.074	7.35	8.709	5.488	5.705	1.272	5.089	37.702	62.471	49.656	54.409	47.077	51.902	34.542	69.497	58.379	48.48	40.069	40.136	9.14191	39.1316	25.4955	14.8381	12.3234	8.03079	3.45352	30.0297	34.3696	45.8524	36.8838	17.4069	15.8651	26.1294	75.7452
Koike_CLKBMAL1_P0870	RIP_Phase060	1_RIP084	intron	5.94003	84.1541	5.58361	23.598	5.38482	19.3076	Nr3c2	19.216	25.874	28.638	17.821	11.114	15.888	22.242	18.382	30.069	12.074	15.497	14.876	2.657	3.671	2.229	1.63	2.096	2.043	2.518	3.761	2.295	1.669	2.191	2.273	4.73103	18.7311	19.5663	29.7855	13.1449	3.72214	2.06517	54.0534	41.4286	65.9129	63.7084	17.3591	42.307	60.7046	53.0216
Koike_CLKBMAL1_P0875	RIP_Phase006	1_RIP085	intron	4.80661	53.5323	3.33982	28.8572	2.54731	7.17956	Senp5	7.2	8.716	6.805	6.146	7.099	7.489	8.421	7.528	7.723	7.136	4.613	7.277	4.305	2.988	3.532	3.343	4.563	4.184	4.617	3.729	3.586	2.596	3.139	3.514	0.267566	26.4439	23.6426	14.415	8.62636	2.23328	2.86347	42.0415	38.1884	45.8524	16.7654	6.31239	2.64419	43.549	22.494
Koike_CLKBMAL1_P0897	RIP_Phase081	1_RIP086	intron	6.29746	46.7522	6.11394	29.4016	6.30475	10.0205	Hadh	7.763	11.374	15.873	10.636	7.239	9.686	11.063	9.879	11.742	9.57	5.517	9.904	30.859	62.072	54.605	53.074	64.169	51.786	32.566	65.826	74.043	48.205	49.451	40.049	11.1993	17.6293	25.7178	19.8615	15.4042	10.422	2.29078	27.0267	22.913	42.9866	20.1184	11.0467	13.2209	26.1294	22.7236
Koike_CLKBMAL1_P0900	RIP_Phase007	1_RIP087	TSS	2.64971	40.6702	2.88279	22.448	2.54731	7.17956	Senp5	7.2	8.716	6.805	6.146	7.099	7.489	8.421	7.528	7.723	7.136	4.613	7.277	4.305	2.988	3.532	3.343	4.563	4.184	4.617	3.729	3.586	2.596	3.139	3.514	0.267566	24.2403	16.3052	12.8998	4.92935	5.03052	2.29078	33.0326	19.0942	20.0604	16.7654	7.89049	10.5768	17.4196	26.6256
Koike_CLKBMAL1_P0903	RIP_Phase129	1_RIP088	intergenic-10kbless	5.26476	85.0047	4.57279	27.364	8.08207	53.8725	Ppara	31.863	64.285	101.894	46.282	45.964	39.188	44.577	48.05	79.432	80.78	19.376	44.78	18.71	50.368	39.751	33.257	37.645	29.47	18.154	57.312	50.953	31.451	34.993	26.331	9.64216	23.1384	22.0121	20.271	13.5557	10.0159	3.43616	56.0554	53.4638	57.3155	46.943	26.8277	29.0861	17.4196	22.7236
Koike_CLKBMAL1_P0916	RIP_Phase135	1_RIP089	TSS	5.96963	52.6745	4.99182	25.5515	8.18695	10.6232	1810013L24Rik	9.524	12.117	13.862	11.934	8.878	8.62	10.556	10.825	10.353	11.991	10.85	7.968	7.949	8.243	5.582	5.692	6.637	7.129	8.202	8.992	6.407	5.638	6.405	6.225	3.19078	23.2052	30.1894	25.977	12.7341	6.15844	3.43616	27.2997	76.3768	40.1209	40.2369	17.6938	8.49346	47.508	53.0217
Koike_CLKBMAL1_P0935	RIP_Phase017	1_RIP090	intron	8.75451	65.4322	5.4777	23.4289	3.30427	8.96818	Tbcel	9.652	13.792	14.303	4.937	5.19	10.99	10.347	8.083	10.981	6.007	3.897	9.438	11.596	19.978	11.647	11.739	10.967	14.147	12.151	19.94	13.802	10.068	12.11	10.17	5.85463	16.5274	19.5663	25.1306	9.1305	4.46656	1.14539	30.0297	30.5507	74.5102	53.6492	22.0934	15.8651	52.2588	7.57453
Koike_CLKBMAL1_P0955	RIP_Phase048	1_RIP091	TSS	23.5271	37.4968	4.03891	20.8814	4.99079	28.3578	Acaa2	27.79	32.755	43.825	21.986	17.738	31.557	31.851	27.726	36.28	26.845	17.315	24.625	253.147	397.763	372.285	351.992	414.836	333.15	268.865	403.589	405.844	365.959	351.787	298.454	11.871	23.1384	17.1205	16.6673	8.01019	3.72214	2.29078	28.7557	15.2754	31.5235	26.8246	15.0158	26.4419	104.518	62.662
Koike_CLKBMAL1_P1010	RIP_Phase178	1_RIP092	TSS	6.48568	84.6753	4.04273	26.1037	10.8388	10.1891	Uvrag	8.17	8.718	10.983	15.321	8.402	9.085	10.252	9.08	11.391	12.428	9.669	8.769	2.926	3.798	4.155	4.508	3.391	2.998	3.22	3.891	4.324	4.331	3.476	3.271	11.481	25.3421	17.1205	16.5444	10.4749	9.67755	3.43616	39.0386	61.1015	71.6444	61.473	9.46859	23.7977	43.549	90.2057
Koike_CLKBMAL1_P1018	RIP_Phase089	1_RIP093	TSS	6.20479	49.4339	6.3521	22.6111	6.64431	10.2711	Gns	7.687	14.125	14.715	10.985	8.77	7.311	9.057	14.216	8.764	10.632	8.089	8.902	18.544	26.394	26.708	22.587	18.804	20.68	21.109	25.949	23.131	24.165	22.745	20.244	9.32286	14.3238	14.403	18.0187	12.9395	7.44427	2.29078	24.0237	38.1884	25.792	33.5307	9.46859	18.5093	8.7098	15.1491
Koike_CLKBMAL1_P1026	RIP_Phase047	1_RIP094	intron	3.92167	75.9745	3.79295	27.2041	4.93928	7.37696	Acaa1a	6.633	12.066	13.469	5.559	4.486	5.529	10.884	8.104	6.858	7.057	3.702	4.175	32.31	52.993	46.761	36.714	41.843	32.98	33.306	56.606	54.314	49.947	39.124	30.466	9.5997	26.4439	24.4579	18.9196	8.62636	7.44427	4.00886	45.0445	68.7391	51.584	10.0592	15.781	15.8651	43.549	53.0217
Koike_CLKBMAL1_P1033	RIP_Phase193	1_RIP095	TSS	2.63044	29.1083	5.07257	17.3528	11.6405	10.2195	Plekhg3	6.928	8.814	10.519	15.278	10.3	8.497	9.413	10.294	7.428	19.007	9.108	7.047	2.244	3.269	2.454	2.599	3.203	1.924	2.3	2.854	2.581	2.936	2.645	2.196	11.4553	13.222	17.1205	14.7699	7.39402	2.97771	1.71808	30.0297	8.44774	22.9262	23.4715	3.1562	18.5093	60.9686	41.7746
Koike_CLKBMAL1_P1088	RIP_Phase111	1_RIP096	intron	3.94973	54.8694	4.84424	22.235	7.42384	64.3947	Slc38a4	19.894	75.065	78.847	111.392	32.231	53.159	51.2	119.856	87.727	65.653	24.729	52.984	143.213	257.441	208.077	156.068	154.096	156.032	139.078	245.021	180.2	176.682	156.998	157.99	7.8656	14.424	29.3494	14.3604	13.5557	11.1213	3.92208	45.0445	64.9203	60.1813	30.1777	14.2029	23.7977	8.70978	15.1491
Koike_CLKBMAL1_P1100	RIP_Phase184	1_RIP097	intron	6.35021	36.4145	4.3788	23.8772	11.0479	20.0061	Gne	7.375	16.489	26.189	40.845	15.457	14.114	12.313	19.902	17.755	37.02	15.429	17.186	30.241	22.109	30.53	24.822	19.98	16.933	29.46	23.16	27.69	31.493	18.981	24.504	8.35265	17.6293	23.6426	19.8206	9.5226	3.72214	2.86347	18.0178	34.3696	37.2551	23.4715	4.73429	5.28838	8.7098	7.57453
Koike_CLKBMAL1_P1104	RIP_Phase001	1_RIP098	intergenic-10kbless	2.24119	53.0569	5.61315	18.2834	2.14876	124.132	Pzp	106.909	150.294	104.387	58.394	91.845	105.546	175.39	211.693	137.322	89.231	128.025	130.544	875.4	679.42	642.837	758.736	658.088	670.715	913.448	682.552	551.863	835.851	787.273	816.922	22.8359	16.5274	17.8616	16.3943	11.2964	5.95542	1.14539	58.0574	29.7407	29.3525	30.1777	6.31239	27.163	60.9686	37.8726
Koike_CLKBMAL1_P1113	RIP_Phase010	1_RIP099	intergenic-10kbless	3.45657	46.3135	4.22642	25.2845	3.04059	8.35616	Sgk2	6.104	13.929	10.652	3.111	4.102	13.136	10.837	17.182	8.115	5.746	1.019	6.34	9.776	16.181	4.481	3.728	6.342	6.147	9.078	15.71	6.619	6.329	8.683	8.338	4.1116	23.1384	27.7189	18.4692	9.24253	9.81291	5.72694	39.0386	49.6449	31.5235	3.35307	12.6248	18.5093	59.385	60.5962
Koike_CLKBMAL1_P1122	RIP_Phase149	1_RIP100	intron	3.57447	59.9737	3.93698	26.1204	8.62897	34.8231	Sord	22.922	34.747	60.444	36.887	29.771	31.868	33.152	27.594	48.474	46.783	18.639	26.595	290.89	532.159	619.372	577.28	561.286	460.163	302.325	572.741	608.358	628.943	512.042	393.999	12.3927	27.5457	17.1205	17.1178	12.286	7.94056	2.29078	42.0415	22.913	54.4497	23.4715	23.3367	42.307	34.8392	83.3197
Koike_CLKBMAL1_P1127	RIP_Phase027	1_RIP101	intergenic-10kbless	6.29214	45.5492	2.72827	24.0033	4.01811	5.91658	Bdh1	5.15	10.89	7.903	3.659	4.709	5.074	7.35	8.709	5.488	5.705	1.272	5.089	37.702	62.471	49.656	54.409	47.077	51.902	34.542	69.497	58.379	48.48	40.069	40.136	9.14191	37.1283	27.7683	16.0667	12.3234	9.2715	4.00886	36.0356	38.1884	53.3208	42.7771	15.781	13.2209	26.1294	75.7453
Koike_CLKBMAL1_P1129	RIP_Phase041	1_RIP102	intron	7.71056	40.1757	4.19394	28.3224	4.82939	5.94755	Spp2	3.594	12.226	11.131	2.794	3.306	4.944	6.827	8.307	7.455	4.761	0.862	5.162	40.86	40.987	51.882	45.34	44.02	45.359	36.324	37.557	43.455	57.276	40.135	39.291	13.5028	15.4256	37.502	16.0257	4.92935	8.1887	2.29078	9.0089	26.7319	45.8524	23.4715	4.73429	10.5768	17.4196	51.1854
Koike_CLKBMAL1_P1139	RIP_Phase115	1_RIP103	intron	3.3663	29.4952	4.7415	19.7471	7.46483	18.6741	Ak2	15.493	23.462	28.915	20.116	14.042	13.583	17.258	16.206	32.432	20	10.61	11.972	41.493	103.738	111.025	81.658	68.969	61.033	42.12	116.91	117.419	85.551	63.801	60.044	9.92666	12.8547	22.0121	18.8787	9.09315	2.97771	1.90898	52.0514	26.7319	19.0183	27.8407	10.4728	5.28838	34.8392	9.86984
Koike_CLKBMAL1_P1149	RIP_Phase095	1_RIP104	TSS	7.6154	45.7307	4.36135	15.9054	6.78877	11.8126	Serpina6	3.606	20.807	25.806	4.981	3.446	6.69	7.045	13.829	36.466	9.076	3.326	6.674	47.383	184.522	271.715	206.361	147.722	95.655	44.83	335.391	216.869	246.856	127.119	68.166	10.6057	22.9715	12.9207	17.5682	12.7528	8.1887	3.34939	30.0297	42.0073	40.1209	43.59	17.4547	18.5093	17.4196	45.4472
Koike_CLKBMAL1_P1160	RIP_Phase002	1_RIP105	intron	1.71942	47.3306	4.62436	21.8519	2.14876	124.132	Pzp	106.909	150.294	104.387	58.394	91.845	105.546	175.39	211.693	137.322	89.231	128.025	130.544	875.4	679.42	642.837	758.736	658.088	670.715	913.448	682.552	551.863	835.851	787.273	816.922	22.8359	14.3238	22.8273	14.961	7.5434	7.44427	5.72694	39.2206	22.913	22.9262	20.1184	6.31239	29.0861	26.1294	15.1491
Koike_CLKBMAL1_P1176	RIP_Phase023	1_RIP106	TSS	5.71836	66.9006	4.13001	31.0408	3.77719	33.1601	Anks4b	33.504	46.214	33.785	22.772	30.493	31.007	36.957	41.39	40.484	32.701	16.729	31.886	26.385	46.185	32.391	33.857	27.956	35.478	29.59	47.008	30.927	32.669	22.815	27.434	6.95033	20.9348	32.0917	19.5749	10.5869	3.24841	5.15424	39.0386	42.0073	63.0471	33.5307	9.46859	15.8651	43.5489	75.7453
Koike_CLKBMAL1_P1185	RIP_Phase150	1_RIP107	intron	6.91235	27.9148	2.53024	20.8099	8.62897	34.8231	Sord	22.922	34.747	60.444	36.887	29.771	31.868	33.152	27.594	48.474	46.783	18.639	26.595	290.89	532.159	619.372	577.28	561.286	460.163	302.325	572.741	608.358	628.943	512.042	393.999	12.3927	32.7544	22.0121	10.3608	6.42309	1.42118	3.43616	9.0089	34.3696	25.792	16.7654	8.51217	5.52876	30.8802	22.7236
Koike_CLKBMAL1_P1221	RIP_Phase083	1_RIP108	intron	23.6253	49.316	3.31521	28.6454	6.33187	27.6255	Aqp9	17.867	33.991	45.464	27.46	20.356	22.787	32.487	28.711	34.233	22.829	19.512	25.809	117.9	167.361	126.445	98.98	102.331	107.837	107.341	158.689	133.089	94.717	96.021	106.311	6.27509	25.9431	16.3052	15.5889	9.91471	8.1887	3.43616	42.0415	19.0942	17.1947	26.8246	9.46859	23.7977	17.4196	0
Koike_CLKBMAL1_P1226	RIP_Phase195	1_RIP109	intron	10.1023	28.4802	7.90072	18.4062	11.7753	4.90392	Rhbdd2	1.858	3.419	5.238	14.574	2.676	2.559	1.908	3.501	3.183	11.54	6.271	2.119	2.408	3.786	4.762	4.306	3.414	2.06	2.176	4.047	5.099	5.243	2.963	2.763	11.3483	6.61098	12.2289	22.7691	14.788	3.72214	1.96104	9.0089	14.8125	31.5235	47.3495	4.73429	7.93257	17.4196	7.57453
Koike_CLKBMAL1_P1255	RIP_Phase088	1_RIP110	intron	8.8109	63.1076	6.60551	25.9442	6.60968	39.0103	Mia2	25.511	48.654	40.548	41.405	23.065	30.546	41.527	44.918	61.223	43.277	26.078	41.372	37.129	52.332	53.399	55.104	52.058	49.264	36.729	51.076	54.614	48.532	43.114	40.45	11.7712	13.222	18.751	24.3252	14.1719	8.93313	4.02621	15.0148	34.3696	40.1209	50.2961	19.0806	23.7977	34.8392	45.4472
Koike_CLKBMAL1_P1257	RIP_Phase153	1_RIP111	TSS	8.18316	34.8599	5.5613	12.7068	8.82855	7.98944	Flcn	5.811	9.472	12.711	9.561	5.776	4.847	6.414	9.88	5.874	12.675	7.782	5.069	5.557	6.562	5.053	4.676	4.493	4.399	5.247	6.469	4.272	4.295	6.407	4.355	4.78968	10.9181	22.5556	13.0636	6.16169	5.95542	2.29078	36.0356	11.4565	34.3893	20.1184	18.9372	7.93257	17.4196	22.7236
Koike_CLKBMAL1_P1266	RIP_Phase028	1_RIP112	intron	6.40605	34.7042	4.52513	23.5557	4.06015	6.30584	Zfyve26	6.314	9.583	6.76	4.915	4.205	4.839	7.529	9.658	6.822	5.525	4.436	5.083	2.602	2.709	1.998	2.086	1.99	2.256	2.876	2.583	2.152	1.767	2.411	2.224	2.81743	16.5274	22.0121	14.6061	9.18651	6.36147	2.55109	20.2928	19.0942	43.8551	6.70615	1.8172	8.73384	26.1294	15.1491
Koike_CLKBMAL1_P1267	RIP_Phase090	1_RIP113	intron	3.83455	45.8416	5.7411	21.9885	6.64431	10.2711	Gns	7.687	14.125	14.715	10.985	8.77	7.311	9.057	14.216	8.764	10.632	8.089	8.902	18.544	26.394	26.708	22.587	18.804	20.68	21.109	25.949	23.131	24.165	22.745	20.244	9.32286	18.2303	20.4804	15.7664	14.1719	5.75239	2.86347	36.0356	43.6274	28.6578	20.1184	11.0467	18.5093	43.549	45.4472
Koike_CLKBMAL1_P1306	RIP_Phase161	1_RIP114	intron	5.83006	47.3421	4.86725	21.7868	9.25271	8.24326	Narf	4.488	7.854	14.861	11.488	5.525	6.862	5.665	7.654	11.978	9.739	7.297	5.507	7.876	11.069	12.932	8.403	8.534	6.387	8.8	12.321	8.91	8.968	5.908	7.449	8.05827	20.4673	18.924	20.039	9.24253	2.23328	4.58155	21.0208	53.4638	28.6578	30.1777	6.31239	13.2209	8.7098	20.6578
Koike_CLKBMAL1_P1322	RIP_Phase204	1_RIP115	intron	12.7561	26.4367	6.27139	16.6758	11.9486	4.7089	Homer2	2.14	4.542	7.294	4.124	7.324	3.405	3.024	2.827	4.37	9.348	4.185	3.924	4.051	6.566	14.672	14.837	9.536	6.919	4.363	7.195	9.878	14.423	9.614	6.493	13.353	12.1201	16.7252	14.9337	11.2778	7.06078	2.86347	18.6548	3.81884	17.1947	43.59	7.89049	17.1472	60.9686	39.9384
Koike_CLKBMAL1_P1327	RIP_Phase130	1_RIP116	intron	4.951	43.7664	4.85324	16.6844	8.08207	53.8725	Ppara	31.863	64.285	101.894	46.282	45.964	39.188	44.577	48.05	79.432	80.78	19.376	44.78	18.71	50.368	39.751	33.257	37.645	29.47	18.154	57.312	50.953	31.451	34.993	26.331	9.64216	21.1685	24.4579	12.9953	12.7715	7.71497	3.55764	45.0445	31.2451	31.4367	33.5307	18.9372	21.1535	78.3882	91.3534
Koike_CLKBMAL1_P1332	RIP_Phase080	1_RIP117	exon	1.40497	79.1109	4.482	22.5674	6.29867	4.65304	Rbm17	5.193	5.049	5.075	5.838	4.367	3.341	5.548	4.769	6.091	4.002	3.451	3.112	12.225	11.828	10.668	10.142	10.526	11.059	11.977	13.2	11.954	10.308	10.196	10.238	4.86194	16.5274	19.9369	15.1384	6.77785	4.46656	3.43616	45.0445	45.8261	36.213	33.5307	10.2815	50.2396	60.9685	45.4472
Koike_CLKBMAL1_P1340	RIP_Phase112	1_RIP118	intron	6.01356	57.5887	4.39386	21.8104	7.42384	64.3947	Slc38a4	19.894	75.065	78.847	111.392	32.231	53.159	51.2	119.856	87.727	65.653	24.729	52.984	143.213	257.441	208.077	156.068	154.096	156.032	139.078	245.021	180.2	176.682	156.998	157.99	7.8656	19.8329	23.2473	14.8927	11.091	5.95542	3.7659	30.0297	45.8261	46.8077	30.1777	18.7459	23.7977	43.5489	44.5291
Koike_CLKBMAL1_P1366	RIP_Phase164	1_RIP119	intron	5.066	62.8285	4.62635	23.8231	9.27323	5.61734	Ppargc1b	3.446	8.107	9.067	8.51	3.622	5.474	2.447	5.64	4.794	8.217	4.502	3.582	0.898	1.52	0.852	0.787	0.824	0.608	0.614	2.044	0.588	0.871	0.956	0.507	6.81885	17.6293	25.8166	16.954	8.04753	0.744427	1.14539	36.0356	49.6449	49.5866	30.1777	4.73429	15.8651	17.4196	30.2981
Koike_CLKBMAL1_P1385	RIP_Phase042	1_RIP120	intron	5.09691	35.9687	5.40829	18.9703	4.82939	5.94755	Spp2	3.594	12.226	11.131	2.794	3.306	4.944	6.827	8.307	7.455	4.761	0.862	5.162	40.86	40.987	51.882	45.34	44.02	45.359	36.324	37.557	43.455	57.276	40.135	39.291	13.5028	11.0851	18.751	12.6404	11.2217	6.69985	3.26262	27.0267	19.0942	22.9262	23.4715	7.89049	10.5768	26.1294	37.8726
Koike_CLKBMAL1_P1397	RIP_Phase064	1_RIP121	intron	4.02733	46.8129	4.44219	20.3811	5.54754	5.81457	Phf17	5.187	8.578	9.219	5.355	4.31	4.73	5.756	7.387	6.579	5.47	2.414	4.79	5.568	10.575	5.289	4.479	5.351	6.505	5.707	10.14	4.979	4.543	6.139	5.975	4.4869	15.3588	19.2451	13.1318	5.54552	6.38403	4.30388	21.0208	53.4638	31.5235	10.0592	9.46859	17.1472	17.4196	15.1491
Koike_CLKBMAL1_P1419	RIP_Phase124	1_RIP122	exon	9.52736	20.2111	4.28062	12.022	7.93255	10.3506	Hectd3	8.125	13.268	12.209	12.762	8.555	8.498	10.957	11.021	9.792	12.811	8.98	7.228	8.808	10.879	9.141	8.569	8.864	9.738	9.383	10.754	9.382	7.94	7.74	8.871	5.0185	17.6293	15.0206	12.6131	9.24253	7.44427	3.43616	12.0119	22.913	29.3525	30.1777	7.89049	13.2209	8.7098	22.7236
Koike_CLKBMAL1_P1422	RIP_Phase072	1_RIP123	intron	3.57813	37.5505	2.4618	27.0055	6.15239	149.886	Abcc2	81.75	228.62	179.143	147.12	76.239	141.958	157.771	178.576	218.478	173.519	77.086	138.366	44.785	93.03	61.056	68.177	52.129	68.575	54.118	84.392	74.141	74.177	62.027	59.556	8.94305	26.4439	21.1968	9.91028	9.8587	7.44427	3.43616	24.0237	34.3696	28.6578	10.0592	4.73429	15.8651	52.2588	7.57453
Koike_CLKBMAL1_P1438	RIP_Phase113	1_RIP124	intron	5.65869	67.5001	4.37079	24.4949	7.42384	64.3947	Slc38a4	19.894	75.065	78.847	111.392	32.231	53.159	51.2	119.856	87.727	65.653	24.729	52.984	143.213	257.441	208.077	156.068	154.096	156.032	139.078	245.021	180.2	176.682	156.998	157.99	7.8656	24.2403	13.4642	18.4419	16.3191	4.94029	2.29078	54.0534	26.7319	63.0471	37.3919	19.2719	23.7977	69.6783	45.4472
Koike_CLKBMAL1_P1447	RIP_Phase070	1_RIP125	TSS	6.11667	48.8551	2.94692	23.5998	5.92805	11.0799	Nfx1	8.977	12.559	13.239	10.462	9.536	9.789	13.022	12.465	14.322	11.265	7.532	9.792	6.077	6.592	6.49	4.972	4.969	5.386	6.389	6.801	4.872	4.806	5.861	4.98	4.77336	26.4439	13.6865	12.1626	6.77785	4.46656	1.71808	21.0208	24.4174	37.2551	24.0812	6.31239	18.5093	9.76551	30.2981
Koike_CLKBMAL1_P1474	RIP_Phase040	1_RIP126	intron	10.4755	57.2887	8.04169	22.6919	4.81022	6.56442	Palmd	7.196	9.371	8.941	4.099	3.527	6.418	6.634	6.826	11.9	3.452	5.955	4.454	7.382	9.659	9.108	5.915	6.599	6.488	6.719	9.51	9.726	5.306	6.659	5.438	7.19283	10.6176	19.4428	22.7964	18.5784	8.93313	3.73119	27.8457	30.5507	54.4497	87.0783	19.8936	23.7977	31.4081	29.38
Koike_CLKBMAL1_P1529	RIP_Phase189	1_RIP127	TSS	7.6217	46.2555	8.10685	22.8185	11.2772	4.71132	Map2k6	2.209	3.379	5.768	11.361	2.293	5.444	1.616	2.973	5.439	10.337	2.697	3.02	0.924	3.441	4.678	2.745	1.806	1.247	0.647	2.452	2.487	3.44	1.038	1.298	10.6074	13.222	8.96788	18.4282	15.4042	7.44427	1.71808	15.0148	30.5507	25.792	36.8838	12.6248	5.28838	8.70978	15.1491
Koike_CLKBMAL1_P1557	RIP_Phase148	1_RIP128	TSS	23.9997	40.4852	6.12843	13.9003	8.54696	6.16061	Nr1d2	2.157	7.43	11.354	7.633	1.845	0.842	3.41	5.683	17.02	9.489	5.476	1.59	6.507	23.896	19.692	9.13	3.759	3.363	8.322	25.842	20.765	11.38	4.008	4.794	8.05021	16.5274	7.31265	9.59632	11.7072	5.95542	0.572694	27.0267	18.6313	28.6578	16.7654	10.6163	37.0187	55.162	8.03359
Koike_CLKBMAL1_P1566	RIP_Phase131	1_RIP129	intron	3.99223	43.9087	3.22013	16.6632	8.12498	6.50016	Bfar	5.78	6.766	10.147	7.327	5.706	5.54	5.448	6.935	7.282	7.155	5.125	4.791	12.443	13.082	13.114	13.642	9.47	11.227	11.656	13.999	14.986	11.531	8.764	11.072	7.86486	20.9348	17.7381	11.4937	4.31318	5.21099	2.29078	31.5767	38.1884	25.792	23.4715	15.4941	20.9131	52.2588	22.7236
Koike_CLKBMAL1_P1587	RIP_Phase035	1_RIP130	TSS	2.78794	46.6927	4.69505	21.5608	4.33819	4.80159	Dyrk1b	3.932	7.4	5.482	4.833	3.581	4.307	5.537	7.568	3.528	4.222	3.804	3.425	2.438	3.25	2.264	2.165	2.578	2.525	3.078	3.201	2.081	2.014	3.306	1.874	3.00611	15.4256	13.8595	12.1626	7.39402	6.69985	0.572694	24.0237	34.3696	28.6578	15.9525	11.0467	26.4419	60.9685	45.4472
Koike_CLKBMAL1_P1588	RIP_Phase169	1_RIP131	TSS	8.20223	14.7532	2.98196	13.9286	9.64954	14.0099	AK021368	11.218	12.142	18.143	11.548	9.569	11.818	10.007	13.152	21.487	22.061	15.352	11.62	1.155	3.532	3.018	3.308	1.761	1.817	2.162	2.091	2.751	2.444	3.522	1.953	11.8787	19.8329	14.6747	10.3608	4.92935	5.21099	1.14539	3.00297	15.2754	22.9262	16.7654	4.73429	0	26.1294	37.8726
Koike_CLKBMAL1_P1592	RIP_Phase004	1_RIP132	TSS	6.85522	51.1931	4.55541	16.0312	2.21923	8.98128	Hspa9	9.93	9.695	7.547	6.977	7.416	9.983	9.56	10.934	10.757	9.132	6.244	9.6	111.724	124.178	119.283	117.372	119.751	111.529	105.153	129.418	135.245	117.914	116.947	101.679	10.0847	15.4256	18.751	15.5207	6.77785	5.21099	3.43616	27.0267	42.0073	28.8314	46.943	11.7162	25.4804	34.8392	22.7236
Koike_CLKBMAL1_P1599	RIP_Phase158	1_RIP133	intron	4.52299	45.2485	5.56494	23.8433	9.17795	11.9074	4833420G17Rik	7.995	12.739	11.285	15.213	9.296	9.559	11.633	13.399	14.316	16.971	9.875	10.609	2.699	2.542	0.892	1.379	3.991	0.945	4.782	2.78	2.959	1.047	2.871	0.969	2.39457	15.4256	16.3052	16.9267	12.0433	3.72214	3.52293	33.0326	49.6449	36.213	21.541	7.89049	13.2209	69.6784	30.2981
Koike_CLKBMAL1_P1623	RIP_Phase196	1_RIP134	intron	6.66549	49.3365	5.0035	15.2777	11.785	8.19991	AK008417	4.498	7.5	9.997	13.235	8.873	6.227	6.033	8.216	6.952	10.41	10.189	6.269	6.184	10.335	11.179	10.548	6.656	6.105	5.313	9.212	10.3	9.191	6.395	5.223	10.3288	10.5509	15.49	11.7122	5.54552	4.46656	2.86347	36.0356	30.5507	40.1209	30.1777	15.781	10.5768	43.549	34.2001
Koike_CLKBMAL1_P1642	RIP_Phase034	1_RIP135	intron	4.92287	47.1722	5.17023	15.5285	4.32025	5.56554	Kif21a	5.53	5.856	5.182	6.07	3.291	5.244	6.797	7.537	6.043	6.308	3.56	5.37	4.107	7.126	5.253	6.544	5.686	5.997	4.931	6.473	6.467	6.476	5.752	5.618	11.7602	9.91647	19.5663	11.7804	11.091	3.72214	6.92439	45.0445	17.8213	31.5235	31.2954	12.5291	23.7977	26.1294	68.1708
Koike_CLKBMAL1_P1651	RIP_Phase024	1_RIP136	intron	3.32485	51.8657	2.54256	22.0767	3.77719	33.1601	Anks4b	33.504	46.214	33.785	22.772	30.493	31.007	36.957	41.39	40.484	32.701	16.729	31.886	26.385	46.185	32.391	33.857	27.956	35.478	29.59	47.008	30.927	32.669	22.815	27.434	6.95033	19.8329	19.9369	11.7122	6.59114	5.95542	5.72694	39.2206	34.2538	31.5235	23.4715	6.31239	26.4419	34.8392	22.7236
Koike_CLKBMAL1_P1652	RIP_Phase021	1_RIP137	intron	4.51596	35.0421	1.81721	19.0387	3.76784	12.8747	Dock4	13.592	15.571	13.828	10.8	8.174	11.333	17.934	14.046	17.723	10.501	9.498	11.498	3.407	3.509	3.677	3.729	3.618	3.65	3.505	3.92	3.381	2.82	3.513	3.67	2.18506	15.4256	13.1924	7.8354	7.39402	8.59475	5.15424	33.0326	19.0942	25.792	16.6638	10.0903	0	17.4196	22.7236
Koike_CLKBMAL1_P1655	RIP_Phase020	1_RIP138	intron	10.7194	27.9679	2.35062	21.8601	3.6871	9.32754	Myo6	9.585	10.207	7.966	8.068	7.07	8.357	11.2	11.7	12.566	8.8	7.098	9.313	6.461	6.38	5.892	5.165	6.081	5.392	7.566	5.425	5.645	5.249	6.44	4.986	2.54401	17.1284	13.8595	9.11855	9.24253	6.69985	6.29963	21.0208	7.63768	5.73155	28.3487	9.46859	5.28838	60.9685	7.57453
Koike_CLKBMAL1_P1673	RIP_Phase114	1_RIP139	intron	4.15476	64.5752	3.04867	21.7036	7.42384	64.3947	Slc38a4	19.894	75.065	78.847	111.392	32.231	53.159	51.2	119.856	87.727	65.653	24.729	52.984	143.213	257.441	208.077	156.068	154.096	156.032	139.078	245.021	180.2	176.682	156.998	157.99	7.8656	25.3421	17.0217	13.514	7.97285	5.21099	2.29078	40.5856	45.8261	44.2893	27.5359	23.6715	29.0861	34.8391	51.415
Koike_CLKBMAL1_P1674	RIP_Phase055	1_RIP140	intergenic-10kbless	1.48693	48.8453	4.07696	21.9206	5.28502	14.9241	Prdx6	16.061	19.606	18.313	17.216	12.026	15.898	13.614	14.501	18.595	11.984	8.071	13.206	117.482	181.314	201.531	182.315	177.166	174.82	125.29	183.872	208.608	175.737	152.936	142.631	11.4984	15.4256	14.6747	12.6131	8.12222	6.69985	4.58155	42.0415	19.0942	25.792	10.0592	11.0467	18.5093	43.549	22.7236
Koike_CLKBMAL1_P1699	RIP_Phase097	1_RIP141	intron	4.69265	46.679	5.81715	22.6979	6.80469	14.2353	Npc1	7.995	18.254	26.679	14.06	7.736	12.711	13.388	14.786	22.081	12.447	7.378	13.309	5.878	14.128	8.64	7.493	7.562	7.586	6.322	12.39	9.461	7.73	7.628	6.035	7.88815	20.6677	18.1581	22.3732	15.7403	7.06078	1.66602	33.0326	64.9203	36.8209	26.8246	7.89049	27.8842	52.2587	25.2484
Koike_CLKBMAL1_P1719	RIP_Phase144	1_RIP142	TSS	5.41523	41.4689	7.24906	22.8045	8.42219	12.382	Peci	9.133	12.474	20.916	15.224	3.713	8.806	8.108	10.255	24.327	14.349	11.363	9.918	43.207	65.474	67.905	57.84	63.079	48.097	45.193	68.272	71.323	63.039	49.291	46.454	10.5099	14.3238	13.8595	12.7632	10.9603	11.9108	4.00886	21.0208	38.1884	51.584	6.70615	12.6248	15.8651	34.8392	0
Koike_CLKBMAL1_P1745	RIP_Phase166	1_RIP143	intron	4.21744	28.8467	3.45454	18.3045	9.44991	4.64134	Klhl21	3.233	6.055	7.884	6.89	4.355	2.919	3.958	3.572	3.866	7.908	3.079	1.978	5.501	8.957	7.993	5.635	6.881	4.509	5.545	9.119	9.236	6.409	6.15	4.541	8.84162	16.5274	23.9391	10.0604	5.54552	3.72214	0.937135	15.0148	53.4638	8.59733	9.65279	12.6248	0	8.70978	22.7236
Koike_CLKBMAL1_P1768	RIP_Phase008	1_RIP144	intron	9.61073	78.7001	6.88721	23.0706	3.02046	29.5212	Agxt2	23.266	34.434	31.385	31.288	18.553	33.947	42.941	51.465	27.106	19.302	13.328	27.239	40.587	50.368	55.305	64.058	47.326	54.667	42.639	54.841	58.879	54.449	49.123	45.734	12.1787	7.71281	19.6157	26.4138	11.091	4.46656	2.29078	21.0208	26.7319	77.376	70.3129	25.2496	13.2209	17.4196	60.5962
Koike_CLKBMAL1_P1777	RIP_Phase013	1_RIP145	TSS	5.79172	31.8628	3.27374	10.2075	3.19778	11.8229	Atf7ip	11.241	12.871	10.708	11.506	9.449	10.528	14.495	15.301	12.228	10.736	11.563	11.249	3.407	2.455	2.765	2.462	2.752	2.66	2.752	2.429	2.327	2.599	3.104	2.484	22.3822	19.7995	16.3052	10.9614	1.5871	2.97771	1.00655	19.2918	39.3456	37.863	20.1184	11.3814	10.5768	34.8392	22.7236
Koike_CLKBMAL1_P1783	RIP_Phase039	1_RIP146	intron	8.26434	36.2161	2.37444	14.4855	4.69233	4.78629	Nab1	4.95	4.914	6.218	4.031	3.351	4.63	4.789	6.554	5.667	4.232	3.711	4.387	19.594	17.072	17.165	17.056	17.235	16.924	17.235	20.792	20.401	17.118	14.67	17.258	6.26815	15.9598	14.6747	6.30654	3.08084	5.95542	3.05437	0	22.913	31.5235	24.894	1.5781	21.1535	17.4196	7.57453
Koike_CLKBMAL1_P1798	RIP_Phase126	1_RIP147	intron	6.10718	32.4252	5.45728	19.6313	7.93689	6.65712	Ypel5	4.503	6.884	9.571	7.034	4.707	5.543	5.514	7.642	9.295	7.638	4.945	6.609	10.043	16.325	13.15	13.201	13.427	11.921	10.896	15.389	15.422	9.687	11.756	9.996	8.66584	16.5274	12.6489	19.4793	7.74879	4.46656	2.86347	20.0198	26.7319	15.6315	30.1777	3.1562	10.5768	0	7.57453
Koike_CLKBMAL1_P1882	RIP_Phase061	1_RIP148	intron	9.84218	46.5569	4.19324	20.2128	5.38482	19.3076	Nr3c2	19.216	25.874	28.638	17.821	11.114	15.888	22.242	18.382	30.069	12.074	15.497	14.876	2.657	3.671	2.229	1.63	2.096	2.043	2.518	3.761	2.295	1.669	2.191	2.273	4.73103	12.1201	20.3815	10.115	6.16169	6.9931	2.29078	27.0267	7.63768	41.3367	23.4715	9.46859	33.1726	43.549	23.1826
Koike_CLKBMAL1_P1909	RIP_Phase120	1_RIP149	intron	3.46503	40.2696	5.48228	13.2929	7.62527	38.6355	1300010F03Rik	31.007	49.194	53.364	38.145	20.847	27.143	35.303	38.003	56.748	53.779	31.141	28.951	11.577	22.433	18.603	15.718	19.512	15.303	13.973	26.789	25.702	13.378	15.189	10.859	8.71489	12.9882	21.6662	20.9399	7.39402	5.95542	3.43616	47.4105	42.0073	47.9366	21.6426	10.6163	21.1535	14.2524	45.4472
Koike_CLKBMAL1_P1921	RIP_Phase116	1_RIP150	intergenic-10kbless	5.30088	31.5869	3.52519	16.5941	7.46483	18.6741	Ak2	15.493	23.462	28.915	20.116	14.042	13.583	17.258	16.206	32.432	20	10.61	11.972	41.493	103.738	111.025	81.658	68.969	61.033	42.12	116.91	117.419	85.551	63.801	60.044	9.92666	18.7311	16.3546	12.8724	7.99152	3.24841	1.75279	18.0178	22.6816	34.3893	13.4123	10.8076	29.0861	78.3881	37.8726
Koike_CLKBMAL1_P1975	RIP_Phase123	1_RIP151	intron	7.42848	28.8249	5.0787	13.9037	7.82455	2.94943	Slc16a7	1.243	3.559	8.517	2.946	0.411	1.591	2.055	1.579	7.566	2.721	1.53	1.675	4.836	23.731	23.36	21.035	22.087	15.355	5.184	26.225	28.533	20.909	17.812	7.131	11.3729	16.0266	24.4332	16.2987	9.14917	7.17357	4.30388	15.7428	26.1533	36.4735	29.4664	6.31239	18.5093	26.1294	7.57453
Koike_CLKBMAL1_P1982	RIP_Phase101	1_RIP152	intergenic-10kbless	8.80323	52.7228	7.74996	19.8498	7.14227	41.2242	Inmt	4.402	74.669	112.457	26.169	16.102	29.706	19.379	34.412	121.5	24.741	3.851	27.303	80.443	636.913	718.559	417.349	433.265	246.884	73.132	598.617	673.884	503.143	456.283	232.699	10.9289	8.71447	15.0947	18.1279	14.0785	7.44427	3.3841	18.0178	23.7231	54.4497	50.4993	7.89049	26.4419	8.70978	37.8726
Koike_CLKBMAL1_P2002	RIP_Phase165	1_RIP153	intron	6.91648	59.3293	4.937	17.9159	9.27323	5.61734	Ppargc1b	3.446	8.107	9.067	8.51	3.622	5.474	2.447	5.64	4.794	8.217	4.502	3.582	0.898	1.52	0.852	0.787	0.824	0.608	0.614	2.044	0.588	0.871	0.956	0.507	6.81885	11.1852	15.49	14.3604	6.77785	5.21099	3.88738	27.0267	38.1884	40.1209	30.3809	18.9372	13.2209	26.1294	22.7236
Koike_CLKBMAL1_P2007	RIP_Phase127	1_RIP154	intron	0.164617	23.1187	2.7442	14.2362	7.97516	10.2724	Dnmbp	7.698	11.579	11.882	12.547	7.957	9.141	10.771	11.595	10.548	12.405	8.649	8.496	2.279	3.014	2.937	2.446	4.066	2.916	1.97	2.799	2.957	2.636	3.806	2.951	16.8779	19.8329	13.0442	10.115	5.65755	0.744427	3.43616	39.0386	7.63768	17.1947	6.90936	8.46435	13.4613	17.4196	22.7236
Koike_CLKBMAL1_P2012	RIP_Phase030	1_RIP155	TSS	7.74909	24.5607	4.64281	10.2592	4.08422	45.013	Sephs2	38.664	47.288	49.177	41.413	32.44	38.689	57.477	64.057	50.981	42.911	28.999	48.06	312.082	389.571	370.623	365.704	329.289	307.731	271.093	386.83	355.614	335.081	331.474	277.767	10.0253	13.5225	10.5984	12.8451	7.39402	1.48885	4.65097	11.5569	40.04	57.2287	27.6375	10.5685	7.93257	45.6605	37.8726
Koike_CLKBMAL1_P2019	RIP_Phase092	1_RIP156	TSS	7.01317	16.1625	3.48551	12.1892	6.78651	10.9068	Tom1l2	11.231	13.651	14.824	12.42	7.215	9.733	9.683	9.552	16.619	10.478	6.912	8.562	4.118	4.891	4.235	5.37	4.055	4.197	3.46	4.824	4.843	3.989	3.512	3.435	9.64506	14.3572	19.7639	8.31317	3.69701	2.97771	1.71808	15.0148	11.4565	30.0472	10.0592	9.46859	7.93257	8.7098	22.7236
Koike_CLKBMAL1_P2039	RIP_Phase094	1_RIP157	TSS	4.62609	29.8268	4.99681	15.5586	6.78818	7.92474	Trip4	6.803	8.697	8.62	7.805	6.919	7.18	7.427	9.899	9.326	8.92	6.332	7.169	11.61	10.797	7.589	8.234	7.918	10.408	11.681	9.213	9.391	8.784	8.566	9.669	2.14799	12.1201	13.0442	11.7122	8.62636	1.80467	4.00886	22.4768	34.3696	20.0604	16.7654	6.31239	10.5768	34.8392	30.2981
Koike_CLKBMAL1_P2040	RIP_Phase175	1_RIP158	intron	7.46226	34.0577	7.18855	11.1875	10.1473	24.0113	Tef	5.651	20.06	46.921	42.662	17.313	11.587	9.44	9.899	49.739	46.654	17.882	10.328	4.165	31.918	32.304	22.438	16.71	6.285	4.665	35.616	28.405	22.711	13.482	5.902	9.96035	11.9532	12.2289	16.9676	15.4042	5.30122	6.82026	12.0119	55.6625	50.8024	50.2961	12.9595	22.5157	8.7098	53.0217
Koike_CLKBMAL1_P2050	RIP_Phase046	1_RIP159	TSS	5.79851	26.6155	5.62082	11.7455	4.87414	11.788	Rabgap1l	12.148	13.786	14.15	9.014	6.208	11.131	13.259	12.382	20.927	8.696	9.231	10.523	2.628	4.91	3.02	2.833	3.675	3.274	2.126	4.457	3.937	2.258	3.192	2.778	7.40828	6.61098	9.78314	8.55888	5.15341	2.97771	2.29078	15.0148	21.7558	25.792	13.4123	3.1562	5.28838	8.7098	7.57453
Koike_CLKBMAL1_P2068	RIP_Phase096	1_RIP160	intergenic-10kbless	3.88474	44.5032	6.66378	14.9254	6.78877	11.8126	Serpina6	3.606	20.807	25.806	4.981	3.446	6.69	7.045	13.829	36.466	9.076	3.326	6.674	47.383	184.522	271.715	206.361	147.722	95.655	44.83	335.391	216.869	246.856	127.119	68.166	10.6057	3.30549	15.49	12.2036	8.64503	6.69985	3.85267	42.0415	22.913	31.5235	30.1777	15.781	21.1535	34.8392	15.1491
Koike_CLKBMAL1_P2070	RIP_Phase202	1_RIP161	intron	6.96959	106.783	7.43957	21.9514	11.9278	12.9573	Cry2	6.744	13.71	14.828	21.189	12.869	12.805	9.398	11.288	10.132	18.747	11.267	12.511	4.386	9.204	7.749	8.322	7.05	4.697	3.724	8.731	7.524	7.1	9.131	4.962	11.6919	8.84803	13.0442	24.7757	14.1719	6.27124	4.58155	64.2453	79.8485	48.7182	97.2391	28.4058	23.7977	26.1294	53.0217
Koike_CLKBMAL1_P2076	RIP_Phase082	1_RIP162	intron	8.5083	35.7974	5.87311	17.5061	6.30475	10.0205	Hadh	7.763	11.374	15.873	10.636	7.239	9.686	11.063	9.879	11.742	9.57	5.517	9.904	30.859	62.072	54.605	53.074	64.169	51.786	32.566	65.826	74.043	48.205	49.451	40.049	11.1993	14.9582	7.75734	11.9033	10.7736	5.77495	1.71808	12.0119	22.913	11.4631	40.2369	1.5781	0	8.70978	22.7236
Koike_CLKBMAL1_P2089	RIP_Phase093	1_RIP163	TSS	2.61204	12.0729	4.29484	12.1126	6.78651	10.9068	Tom1l2	11.231	13.651	14.824	12.42	7.215	9.733	9.683	9.552	16.619	10.478	6.912	8.562	4.118	4.891	4.235	5.37	4.055	4.197	3.46	4.824	4.843	3.989	3.512	3.435	9.64506	14.9248	19.1463	13.6232	4.31318	3.54167	3.43616	21.6578	22.4502	44.1156	28.5519	14.5855	21.1535	33.2556	41.0861
Koike_CLKBMAL1_P2140	RIP_Phase065	1_RIP164	intron	4.34824	23.7863	5.36324	8.60985	5.54754	5.81457	Phf17	5.187	8.578	9.219	5.355	4.31	4.73	5.756	7.387	6.579	5.47	2.414	4.79	5.568	10.575	5.289	4.479	5.351	6.505	5.707	10.14	4.979	4.543	6.139	5.975	4.4869	15.4256	18.2569	9.91028	7.18863	5.95542	3.43616	27.0267	19.0942	34.3893	21.3377	3.1562	13.2209	43.549	45.4472
Koike_CLKBMAL1_P2187	RIP_Phase192	1_RIP165	intron	9.05663	36.3663	10.2945	16.55	11.5308	27.6039	Smarca2	21.863	26.069	25.646	45.39	20.211	19.131	22.112	25.281	26.399	42.256	34.148	22.739	9.834	10.778	16.01	14.504	11.532	9.184	9.573	11.063	14.417	15.683	12.962	8.503	12.313	3.30549	3.26105	15.7664	20.3336	2.23328	2.29078	12.0119	18.8628	40.1209	30.1777	9.46859	7.93257	26.1294	15.1491
Koike_CLKBMAL1_P2190	RIP_Phase049	1_RIP166	intron	7.3075	36.6519	3.75305	18.1328	5.02239	10.2455	Sorbs1	11.633	13.125	17.023	9.469	7.305	7.994	12.518	9.716	13.043	6.147	7.624	7.349	4.155	8.046	4.943	4.826	6.091	5.27	4.355	8.588	7.844	3.861	5.209	4.705	7.41763	14.5575	16.3052	7.20748	6.77785	5.21099	4.00886	21.0208	15.2754	30.9156	23.4715	9.46859	15.8651	26.1294	15.1491
Koike_CLKBMAL1_P2192	RIP_Phase031	1_RIP167	TSS	9.28627	78.3487	5.88042	21.6874	4.08422	45.013	Sephs2	38.664	47.288	49.177	41.413	32.44	38.689	57.477	64.057	50.981	42.911	28.999	48.06	312.082	389.571	370.623	365.704	329.289	307.731	271.093	386.83	355.614	335.081	331.474	277.767	10.0253	19.4657	12.5007	18.2917	17.5141	2.97771	4.58155	27.0267	53.4638	40.7288	71.0242	23.6715	21.1535	43.549	37.8726
Koike_CLKBMAL1_P2229	RIP_Phase170	1_RIP168	intron	13.404	28.6952	3.60996	15.1006	9.64954	14.0099	AK021368	11.218	12.142	18.143	11.548	9.569	11.818	10.007	13.152	21.487	22.061	15.352	11.62	1.155	3.532	3.018	3.308	1.761	1.817	2.162	2.091	2.751	2.444	3.522	1.953	11.8787	11.0183	10.5984	8.38143	3.08084	10.422	1.14539	12.0119	15.2754	5.73155	26.8246	17.3591	10.5768	78.3881	53.0217
Koike_CLKBMAL1_P2245	RIP_Phase151	1_RIP169	intergenic-10kbless	9.89882	33.7104	5.55506	17.8299	8.74055	5.97103	Aqp11	4.839	6.042	8.047	6.075	4.147	4.514	4.783	6.023	8.008	6.337	6.821	6.017	10.845	10.731	15.099	19.317	11.66	11.14	9.165	11.319	12.544	27.066	13.228	13.487	13.9799	12.1201	11.4137	16.7902	9.24253	3.72214	2.29078	6.00593	21.8715	34.3893	50.2961	12.6248	2.64419	17.4196	45.4472
Koike_CLKBMAL1_P2267	RIP_Phase177	1_RIP170	intron	7.19942	15.1901	5.86342	14.9739	10.3957	24.9468	Il15ra	13.167	20.999	26.262	25.23	17.31	14.562	13.299	18.913	24.067	29.044	23.194	15.443	3.747	5.974	6.259	5.187	4.381	4.455	5.248	6.484	5.695	4.541	6.172	3.847	9.23066	14.7912	9.78314	15.9848	7.99152	5.95542	2.86347	14.5598	7.63768	22.9262	12.5994	5.40379	5.28838	8.70978	0
Koike_CLKBMAL1_P2277	RIP_Phase188	1_RIP171	intron	4.97156	20.2501	2.18034	11.8876	11.2002	3.79886	Gm129	1.269	1.557	4.402	8.471	1.038	1.843	1.334	0.961	5.258	16.62	2.097	0.738	0.059	3.384	4.401	1.703	0.485	0.112	0	3.593	3.667	1.634	0.16	0.468	9.19053	28.2135	23.7661	19.1107	11.5578	12.3846	5.48398	29.1197	47.9091	47.3287	52.1251	8.75127	10.5768	14.5163	24.5598
Koike_CLKBMAL1_P2279	RIP_Phase084	1_RIP172	TSS	3.99877	25.1182	6.15098	10.4574	6.35291	11.5913	9030617O03Rik	10.099	17.485	16.363	13.478	7.895	10.995	9.638	12.883	12.321	10.501	8.692	8.745	6.69	9.988	10.831	9.979	9.244	9.337	7.914	9.795	11.27	6.691	6.749	7.7	9.29455	6.61098	11.3396	9.28236	8.71972	5.95542	3.01966	24.0237	7.63768	17.1947	20.1184	4.73429	7.93257	17.4196	37.8726
Koike_CLKBMAL1_P2280	RIP_Phase011	1_RIP173	TSS	6.40098	31.2606	5.1003	7.59723	3.07854	61.5293	Fbp1	82.669	76.818	69.475	59.992	27.257	54.249	69.068	89.189	67.547	28.215	58.982	54.889	308.838	444.625	459.101	435.84	463.034	549.119	298.076	503.423	615.908	407.903	401.45	413.797	11.7325	11.0183	15.2429	9.45982	3.08084	4.75982	1.71808	12.0119	44.7846	37.2551	16.7654	12.6248	21.1535	17.4196	8.95171
Koike_CLKBMAL1_P2311	RIP_Phase181	1_RIP174	intron	7.67524	27.2106	4.28066	8.34599	10.9539	8.00616	Nrg4	3.38	4.129	13.186	14.07	4.703	4.155	3.025	3.57	14.693	16.944	10.676	3.542	1.627	2.155	3.253	2.621	1.424	1.269	0.992	2.674	3.349	1.819	1.348	1.325	9.86878	13.5892	11.4137	13.1318	9.16784	4.46656	4.14769	26.7537	34.9482	34.9104	30.1777	11.4293	7.45181	58.5932	8.72218
Koike_CLKBMAL1_P2347	RIP_Phase171	1_RIP175	intron	1.73587	44.8246	4.73592	15.5945	9.64954	14.0099	AK021368	11.218	12.142	18.143	11.548	9.569	11.818	10.007	13.152	21.487	22.061	15.352	11.62	1.155	3.532	3.018	3.308	1.761	1.817	2.162	2.091	2.751	2.444	3.522	1.953	11.8787	8.81464	17.5652	11.2617	7.39402	1.48885	1.21481	45.8635	22.913	17.1947	20.1184	12.6248	13.2209	34.8392	30.2981
Koike_CLKBMAL1_P2348	RIP_Phase157	1_RIP176	intron	9.10461	41.1749	6.23324	19.522	9.06642	19.4827	Clmn	15.657	19.22	29.73	25.843	14.155	11.138	18.743	18.484	25.077	23.22	22.648	9.877	9.327	13.305	14.665	10.39	11.632	9.194	9.805	16.23	13.273	10.502	10.86	8.083	8.87359	13.3221	16.3052	23.5472	12.5474	8.32405	2.29078	15.0148	38.1884	69.647	50.2961	15.3984	16.7465	49.0916	30.2981
Koike_CLKBMAL1_P2352	RIP_Phase015	1_RIP177	intron	5.9247	32.592	4.31471	10.4252	3.19889	16.345	Ephx1	18.831	21.915	18.665	16.016	14.999	17.33	20.011	17.262	14.845	16.27	4.666	15.33	99.414	176.621	147.3	200.784	143.382	177.939	124.392	197.661	231.18	139.296	126.544	119.827	10.2062	13.222	6.5221	8.29952	11.091	2.97771	2.86347	27.0267	26.8476	33.4341	33.5307	12.6248	15.8651	26.1294	47.2835
Koike_CLKBMAL1_P2367	RIP_Phase066	1_RIP178	intron	8.79709	24.6929	4.31531	16.0764	5.59598	14.7329	Map2k7	12.193	17.528	16.735	15.265	13.421	11.933	19.15	17.953	15.546	16.067	9.401	11.603	5.089	4.844	4.205	4.935	4.163	5.454	5.375	5.358	5.306	4.407	5.292	5.07	1.5624	13.3889	17.9605	12.5312	9.24253	3.72214	1.71808	12.0119	7.63768	31.3499	16.7654	7.12535	9.37485	8.7098	7.57453
Koike_CLKBMAL1_P2393	RIP_Phase119	1_RIP179	TSS	9.07715	31.2937	5.85612	13.8684	7.52172	8.0831	Acot4	1.318	13.931	27.088	3.089	3.691	4.521	2.387	5.999	17.829	9.136	1.13	6.877	1.932	27.178	24.247	21.697	23.295	14.55	2.271	38.526	46.31	16.016	17.985	7.93	10.3888	6.61098	12.476	9.45982	4.92935	4.46656	1.14539	12.0119	11.4565	22.9262	26.8246	6.31239	2.64419	8.7098	7.57453
Koike_CLKBMAL1_P2394	RIP_Phase038	1_RIP180	intron	5.41458	36.4629	3.0946	17.0091	4.53219	74.6252	Uox	57.385	102.503	107.173	63.298	35.385	79.695	81.031	141.728	98.903	50.611	14.481	63.31	352.45	977.949	885.024	571.124	605.108	519.974	370.87	965.103	826.468	657.606	531.029	453.677	9.29272	14.1568	16.4288	10.3608	5.37747	5.95542	4.00886	28.3917	30.5507	32.913	23.4715	11.0467	13.2209	8.7098	21.5759
Koike_CLKBMAL1_P2496	RIP_Phase190	1_RIP181	intron	6.24005	41.4816	5.43369	14.5413	11.2984	2.25497	Bmf	0.64	1.97	3.438	6.2	1.315	1.073	0.72	1.967	1.167	4.652	2.44	1.477	1.262	2.723	1.179	2.003	1.51	1.019	1.077	1.911	0.965	1.344	1.83	1.877	7.87798	11.9532	9.68432	11.6849	8.62636	2.97771	3.01966	21.0208	19.0942	22.9262	23.4715	14.2029	15.8651	52.2587	53.0217
Koike_CLKBMAL1_P2540	RIP_Phase117	1_RIP182	intron	4.90736	29.5939	3.89201	12.8504	7.46483	18.6741	Ak2	15.493	23.462	28.915	20.116	14.042	13.583	17.258	16.206	32.432	20	10.61	11.972	41.493	103.738	111.025	81.658	68.969	61.033	42.12	116.91	117.419	85.551	63.801	60.044	9.92666	13.222	14.6747	7.65795	6.3484	2.95515	1.71808	21.0208	15.2754	33.6077	6.70615	10.0903	11.0575	24.5458	0
Koike_CLKBMAL1_P2572	RIP_Phase012	1_RIP183	intron	4.31305	47.9533	3.47239	13.7552	3.09925	18.3902	Nfe2l2	22.135	26.792	18.711	13.357	12.478	19.885	23.66	14.645	26.144	16.702	8	18.175	9.25	21.599	13.871	16.803	16.595	22.267	8.996	21.497	15.867	11.278	15.028	12.072	9.1207	21.9364	20.0851	11.835	5.58286	3.76725	0	36.0356	30.5507	32.5656	37.2902	12.0509	23.7977	11.877	30.2981
Koike_CLKBMAL1_P2615	RIP_Phase199	1_RIP184	intron	4.31355	33.3955	4.54717	10.9377	11.91	54.1765	Mtss1	32.688	49.27	61.159	74.958	67.715	40.515	35.566	34.624	68.101	84.793	76.644	24.086	9.699	23.464	28.942	21.866	18.025	12.599	12.979	23.966	21.35	24.228	12.308	12.712	10.4598	11.2186	12.1054	12.968	3.08084	4.0154	5.15424	21.0208	64.9203	22.9262	20.1184	13.3899	7.93257	43.5489	33.9706
Koike_CLKBMAL1_P2617	RIP_Phase033	1_RIP185	intron	1.1976	16.3123	2.48909	10.2229	4.2741	17.8978	Cyp2c44	12.732	36.577	23.877	13.617	8.443	12.748	19.229	41.364	18.913	8.403	5.198	13.672	55.381	104.722	119.754	83.654	96.663	77.325	45.602	113.223	93.766	123.33	95.15	69.123	11.8302	14.3238	9.53609	7.99921	3.69701	3.72214	1.14539	23.2047	15.2754	11.4631	3.35307	1.5781	7.93257	8.70978	7.57453
Koike_CLKBMAL1_P2622	RIP_Phase068	1_RIP186	intron	9.722	75.1347	7.89654	12.652	5.77303	3.85985	Thra	2.74	6.14	8.105	3.275	1.351	2.632	3.93	6.698	3.879	3.693	1.833	2.042	4.42	5.275	2.467	2.026	2.571	3.411	3.629	4.559	2.293	1.955	2.841	3.031	3.22879	12.1201	2.79165	14.3604	8.75706	3.72214	1.4057	21.0208	51.6122	62.4392	84.2333	25.2496	13.2209	49.6194	22.7236
Koike_CLKBMAL1_P2651	RIP_Phase138	1_RIP187	intron	8.14376	22.7219	2.57438	12.9736	8.35346	24.789	Cpt1a	13.013	30.176	37.179	38.641	14.548	14.971	17.733	34.405	30.583	33.01	17.01	16.2	49.183	71.817	79.942	76.304	68.717	55.951	49.859	78.169	91.102	72.197	51.755	48.289	10.6153	16.4607	5.70683	9.35061	3.69701	5.21099	3.43616	9.4639	18.747	22.9262	14.53	6.31239	7.93257	8.7098	30.2981
Koike_CLKBMAL1_P2662	RIP_Phase102	1_RIP188	TTS	7.29757	29.0409	5.93084	7.93096	7.1898	17.5692	Sphk2	12.822	26.384	30.264	21.532	10.693	13.111	16.704	19.038	18.127	20.545	11.474	10.137	10.055	8.041	6.76	6.475	10.657	8.397	9.726	7.471	7.122	6.009	13.706	8.996	21.5583	3.30549	8.96788	13.8826	1.23234	1.48885	0.937135	6.00593	19.0942	40.1209	13.4123	3.1562	2.64419	0	15.1491
Koike_CLKBMAL1_P2729	RIP_Phase139	1_RIP189	intron	3.07581	53.8499	4.31054	16.2751	8.38122	22.3143	2210021J22Rik	10.397	31.451	44.282	22.315	19.785	13.209	12.047	24.773	27.491	32.751	11.884	17.385	3.309	2.505	1.338	1.349	0.871	1.304	2.524	1.662	1.732	1.112	1.365	0.952	4.07776	15.4256	13.563	12.7632	6.77785	6.69985	1.71808	33.0326	57.2826	28.7446	16.7654	5.92982	31.6501	17.4196	22.7236
Koike_CLKBMAL1_P2785	RIP_Phase050	1_RIP190	intron	7.39006	35.3449	4.26958	15.4084	5.02239	10.2455	Sorbs1	11.633	13.125	17.023	9.469	7.305	7.994	12.518	9.716	13.043	6.147	7.624	7.349	4.155	8.046	4.943	4.826	6.091	5.27	4.355	8.588	7.844	3.861	5.209	4.705	7.41763	8.81464	15.49	7.05732	6.16169	4.46656	2.29078	21.0208	19.0942	17.1947	33.5307	1.5781	5.28838	0	7.57453
Koike_CLKBMAL1_P2797	RIP_Phase140	1_RIP191	intron	7.19177	29.3771	5.49729	12.8593	8.38122	22.3143	2210021J22Rik	10.397	31.451	44.282	22.315	19.785	13.209	12.047	24.773	27.491	32.751	11.884	17.385	3.309	2.505	1.338	1.349	0.871	1.304	2.524	1.662	1.732	1.112	1.365	0.952	4.07776	9.98324	15.2182	16.5444	5.04138	4.44401	1.31893	9.0089	19.0942	51.584	16.1557	1.5781	0	17.4196	7.57453
Koike_CLKBMAL1_P2810	RIP_Phase172	1_RIP192	intron	5.69834	49.3376	2.88944	17.2907	9.68084	9.41363	Slc16a12	2.711	9.581	17.761	10.372	7.164	6.112	5.017	5.24	17.741	13.969	5.793	11.5	10.987	21.23	33.733	33.164	19.972	17.059	11.374	24.853	36.107	29.006	16.543	17.165	11.565	18.7311	10.4502	9.45982	8.81308	5.95542	2.86347	30.9397	19.0942	28.6578	30.1777	15.781	21.1535	34.8391	22.7236
Koike_CLKBMAL1_P2885	RIP_Phase069	1_RIP193	exon	4.01523	24.203	3.23844	8.47517	5.81097	4.11172	AK082325	2.308	7.282	7.293	2.94	1.482	2.984	5.541	5.234	5.698	4.395	2.397	1.788	0.984	5.375	2.868	1.578	1.149	1.59	1.583	5.204	4.035	2.157	2.635	1.433	7.88043	12.1201	12.476	8.10841	4.31318	2.23328	0.572694	24.1147	34.3696	20.5815	10.0592	3.1562	7.93257	80.2356	22.7236
Koike_CLKBMAL1_P2889	RIP_Phase098	1_RIP194	intron	5.47202	15.3332	5.81225	15.7919	6.80469	14.2353	Npc1	7.995	18.254	26.679	14.06	7.736	12.711	13.388	14.786	22.081	12.447	7.378	13.309	5.878	14.128	8.64	7.493	7.562	7.586	6.322	12.39	9.461	7.73	7.628	6.035	7.88815	16.8947	16.6017	19.8206	8.34628	5.95542	3.1932	18.0178	40.85	29.2657	17.6798	8.55999	18.5093	65.7193	30.2981
Koike_CLKBMAL1_P2911	RIP_Phase014	1_RIP195	intron	2.25566	35.6073	5.35959	11.5289	3.19778	11.8229	Atf7ip	11.241	12.871	10.708	11.506	9.449	10.528	14.495	15.301	12.228	10.736	11.563	11.249	3.407	2.455	2.765	2.462	2.752	2.66	2.752	2.429	2.327	2.599	3.104	2.484	22.3822	6.61098	8.96788	6.26559	6.87121	2.68445	2.86347	36.3086	21.0615	14.3289	13.4123	7.89049	10.5768	8.7098	22.7236
Koike_CLKBMAL1_P2918	RIP_Phase087	1_RIP196	intron	2.60018	42.9496	6.26372	12.2039	6.59157	4.6322	Slc23a2	4.784	4.788	8.75	4.494	3.121	3.531	4.465	4.617	6.54	3.537	3.459	3.501	3.558	3.906	3.292	2.738	2.903	2.651	3.234	5.062	3.83	2.479	3.184	2.712	6.13378	7.31214	13.0442	12.7086	6.83387	3.72214	2.22136	60.1503	22.913	25.792	26.8246	7.89049	10.5768	34.8392	15.1491
Koike_CLKBMAL1_P3023	RIP_Phase058	1_RIP197	3' UTR	2.59959	38.744	3.04776	15.3251	5.32119	6.80878	Gnat1	5.789	8.703	11.914	3.251	5.483	5.488	6.997	12.846	9.074	5.767	3.332	3.061	10.112	13.168	6.429	3.6	2.612	3.001	6.345	12.48	7.726	4.852	3.241	6.554	5.57022	96.8942	84.5402	51.4352	28.1757	19.0619	7.68798	107.197	129.956	117.844	83.4204	33.1401	68.7489	88.6815	71.1546
Koike_CLKBMAL1_P3030	RIP_Phase203	1_RIP198	exon	7.2696	50.1568	3.87124	13.7675	11.9374	18.6071	Lcat	12.321	14.364	22.198	20.279	19.876	16.804	15.963	18.593	16.289	32.438	20.26	13.9	161.604	151.33	162.883	172.053	184.533	163.828	170.634	171.097	159.382	170.29	167.834	194.348	19.5256	7.71281	11.5372	7.65795	3.69701	5.21099	4.35594	9.0089	38.1884	47.3287	16.7654	20.5153	13.0607	34.8392	30.2981
Koike_CLKBMAL1_P3031	RIP_Phase159	1_RIP199	intron	8.99869	37.2553	7.61153	9.63957	9.23458	16.8636	Trak1	14.681	17.305	19.382	19.593	13.268	15.39	16.907	15.314	19.264	23.975	14.719	12.564	4.102	5.904	6.664	6.061	5.101	4.443	3.824	6.437	6.977	6.06	4.83	4.824	10.759	5.90981	8.10321	4.96879	11.091	2.63933	3.52293	6.00593	22.913	28.6578	26.8246	14.2029	8.41333	26.1294	22.7236
Koike_CLKBMAL1_P3052	RIP_Phase160	1_RIP200	intron	2.93131	30.0317	6.2743	13.7489	9.23458	16.8636	Trak1	14.681	17.305	19.382	19.593	13.268	15.39	16.907	15.314	19.264	23.975	14.719	12.564	4.102	5.904	6.664	6.061	5.101	4.443	3.824	6.437	6.977	6.06	4.83	4.824	10.759	8.81464	12.2289	9.73283	8.01019	5.21099	4.3733	24.0237	26.7319	14.3289	13.4123	9.46859	10.5768	8.7098	33.9706
Koike_CLKBMAL1_P3075	RIP_Phase121	1_RIP201	intron	5.45839	30.8659	5.65712	16.393	7.62527	38.6355	1300010F03Rik	31.007	49.194	53.364	38.145	20.847	27.143	35.303	38.003	56.748	53.779	31.141	28.951	11.577	22.433	18.603	15.718	19.512	15.303	13.973	26.789	25.702	13.378	15.189	10.859	8.71489	12.3538	23.3955	22.4961	9.31722	5.59448	3.40145	41.8595	40.1557	48.7182	19.9152	3.96916	11.6985	8.7098	30.2981
Koike_CLKBMAL1_P3102	RIP_Phase029	1_RIP202	TSS	1.27178	20.4653	6.1635	8.20454	4.06015	6.30584	Zfyve26	6.314	9.583	6.76	4.915	4.205	4.839	7.529	9.658	6.822	5.525	4.436	5.083	2.602	2.709	1.998	2.086	1.99	2.256	2.876	2.583	2.152	1.767	2.411	2.224	2.81743	4.40732	14.4524	9.91028	4.31318	2.97771	3.43616	33.0326	22.913	10.7684	23.4715	7.221	13.2209	10.8213	7.57453
Koike_CLKBMAL1_P3131	RIP_Phase179	1_RIP203	intron	9.17131	28.6973	5.7658	11.5751	10.8388	10.1891	Uvrag	8.17	8.718	10.983	15.321	8.402	9.085	10.252	9.08	11.391	12.428	9.669	8.769	2.926	3.798	4.155	4.508	3.391	2.998	3.22	3.891	4.324	4.331	3.476	3.271	11.481	6.61098	7.65852	8.44968	7.39402	2.97771	4.58155	18.0178	7.63768	17.1947	26.8246	11.0467	5.28838	17.4196	15.1491
Koike_CLKBMAL1_P3187	RIP_Phase018	1_RIP204	intron	7.77252	18.2122	5.6732	9.44385	3.30427	8.96818	Tbcel	9.652	13.792	14.303	4.937	5.19	10.99	10.347	8.083	10.981	6.007	3.897	9.438	11.596	19.978	11.647	11.739	10.967	14.147	12.151	19.94	13.802	10.068	12.11	10.17	5.85463	13.1218	11.5619	23.083	3.69701	1.01513	2.86347	5.64194	21.9873	71.9918	13.4123	4.25608	5.28838	0	22.7236
Koike_CLKBMAL1_P3189	RIP_Phase133	1_RIP205	intergenic-10kbless	10.9796	18.3108	10.2624	5.0299	8.16675	6.42385	Pla2g6	5.314	6.087	9.453	5.637	6.603	4.953	6.261	6.466	9.323	7.362	5.051	4.576	4.708	12.776	8.14	6.115	9.594	5.855	6.844	9.896	11.74	13.113	10.198	7.292	11.2717	2.20366	3.26105	8.06746	5.3588	5.21099	2.86347	14.5598	15.2754	17.1947	30.1777	17.3591	5.28838	8.7098	52.7922
Koike_CLKBMAL1_P0002	RoP_Phase024	2_RantiP001	intergenic-10kbless	5.10923	329.949	2.9054	215.995	12.8425	7.82813	Per1	0.831	1.197	8.198	16.824	8.697	4.835	1.24	0.451	5.542	30.439	8.082	7.601	0.169	1.476	2.973	2.606	1.158	0.458	0.177	1.169	3.441	2.154	0.518	0.358	11.3196	248.513	187.066	118.473	96.9065	90.1885	35.6459	325.139	299.374	319.317	275.968	92.247	193.587	253.64	114.995
Koike_CLKBMAL1_P0008	RoP_Phase025	2_RantiP002	intergenic-10kbless	3.45081	418.821	3.18428	129.025	12.8425	7.82813	Per1	0.831	1.197	8.198	16.824	8.697	4.835	1.24	0.451	5.542	30.439	8.082	7.601	0.169	1.476	2.973	2.606	1.158	0.458	0.177	1.169	3.441	2.154	0.518	0.358	11.3196	196.359	167.672	99.567	71.5129	64.2463	24.1399	431.608	369.386	345.717	317.526	108.745	216.503	315.664	125.324
Koike_CLKBMAL1_P0013	RoP_Phase056	2_RantiP003	TSS	4.62059	118.472	4.10688	46.344	14.3472	17.2868	Per2	6.623	9.17	11.663	25.409	34.175	21.052	9.298	4.411	14.899	35.029	22.63	13.083	0.805	4.416	6.841	8.985	3.786	1.779	0.973	4.814	6.343	10.011	3.007	1.72	12.2177	80.7007	57.6118	48.5549	52.449	35.0783	12.3216	113.385	127.873	126.007	115.935	42.9912	93.0274	34.8392	15.1491
Koike_CLKBMAL1_P0016	RoP_Phase069	2_RantiP004	intron	4.20614	94.6862	2.9088	62.6418	21.1644	10.5895	Nfil3	14.159	10.094	2.606	9.719	12.315	10.868	13.784	15.273	3.296	7.611	15.113	12.235	13.179	5.142	6.364	12.012	15.267	19.502	12.187	4.282	7.353	12.929	19.701	21.839	20.1215	136.627	130.195	51.6263	26.8127	16.3774	10.2738	162.16	135.858	103.255	77.1207	22.0934	37.0187	174.196	128.767
Koike_CLKBMAL1_P0029	RoP_Phase026	2_RantiP005	intergenic-10kbless	7.89419	112.797	5.00876	52.909	12.8425	7.82813	Per1	0.831	1.197	8.198	16.824	8.697	4.835	1.24	0.451	5.542	30.439	8.082	7.601	0.169	1.476	2.973	2.606	1.158	0.458	0.177	1.169	3.441	2.154	0.518	0.358	11.3196	60.2667	68.3585	52.8276	37.7543	26.461	7.82682	57.0564	102.53	137.557	130.567	14.5376	52.5633	52.2588	33.9706
Koike_CLKBMAL1_P0039	RoP_Phase029	2_RantiP006	intron	7.05444	189.895	5.82255	96.3312	13.0627	7.77057	Klf13	4.347	4.871	6.746	20.558	7.981	6.089	2.608	2.858	3.016	18.309	11.789	4.076	1.32	2.132	2.889	2.687	1.627	1.368	1.639	2.714	3.623	3.773	1.303	1.325	10.7917	58.1632	65.048	59.1068	45.5031	27.5438	8.01771	87.0861	131.924	151.886	117.358	38.4482	39.6628	52.2588	37.8726
Koike_CLKBMAL1_P0041	RoP_Phase063	2_RantiP007	intron	3.43927	102.268	2.64739	78.2604	15.5734	30.7974	Rorc	13.21	12.152	21.305	48.982	57.129	44.428	13.016	5.276	21.977	38.792	51.475	41.826	9.511	19.281	31.84	54.098	52.018	26.516	8.534	19.353	36.17	42.267	49.574	21.189	15.1411	77.1281	61.1446	36.4879	25.2629	21.5884	14.6297	90.089	72.558	76.5944	50.2961	14.1072	47.0345	87.0979	37.8726
Koike_CLKBMAL1_P0077	RoP_Phase105	2_RantiP008	TTS	3.74986	57.9916	3.77906	38.7537	0.0191392	27.6429	Ppp1r3c	30.713	43.424	19.815	11.536	22.186	43.182	40.638	43.23	14.887	6.774	3.454	51.876	43.079	33.245	11.889	39.988	104.196	118.199	47.191	26.466	16.914	36.743	117.012	69.703	20.1697	64.6407	66.0362	41.3475	12.5474	6.69985	3.15849	89.816	82.6258	62.9602	31.7018	1.5781	15.8651	182.906	121.192
Koike_CLKBMAL1_P0113	RoP_Phase043	2_RantiP009	intron	5.76547	96.2109	4.66618	50.0023	13.5822	7.40852	Tspan4	7.11	4.165	8.681	8.183	11.882	4.937	5.181	3.795	6.776	12.379	10.568	5.246	15.583	13.354	30.7	31.419	23.46	17.227	14.348	15.413	22.907	36.801	27.959	27.453	14.8264	46.1433	40.4913	39.1907	18.9332	15.7232	1.71808	50.0495	80.89	93.789	50.2961	27.7363	40.0635	42.4933	37.8726
Koike_CLKBMAL1_P0196	RoP_Phase039	2_RantiP010	TSS	4.41427	116.439	3.48528	44.8925	13.3509	5.80708	Mepce	4.585	5.23	6.245	6.355	6.123	6.006	5.716	5.118	4.543	8.416	6.417	4.931	5.037	5.258	5.165	5.212	5.824	4.093	4.509	4.706	4.69	4.248	4.624	5.089	12.7744	37.4622	37.7985	23.8748	14.1532	17.8663	6.29963	69.0683	87.8333	65.9129	74.1741	17.0243	50.6402	148.066	60.5962
Koike_CLKBMAL1_P0224	RoP_Phase015	2_RantiP011	TSS	5.48465	59.8452	5.4997	21.9232	12.626	13.5849	Pim3	5.079	11.384	11.933	29.086	12.632	11.044	6.214	6.343	7.453	37.348	13.424	11.077	5.692	9.282	15.195	11.09	9.679	6.75	8.227	9.783	18.504	11.238	10.064	8.051	11.2714	16.8613	32.487	27.0144	8.90644	4.85006	0.572694	21.0208	81.0057	61.5708	31.7018	11.0467	10.4165	40.1179	9.41078
Koike_CLKBMAL1_P0235	RoP_Phase081	2_RantiP012	exon	6.28351	79.3647	3.73101	46.4076	22.9118	28.515	Cpn1	30.505	30.26	17.868	15.423	23.39	35.085	40.409	33.994	25.479	22.74	29.626	37.403	35.735	46.844	41.445	41.246	44.216	41.162	38.363	45.118	40.16	37.847	41.343	41.025	9.10644	46.2768	33.4999	27.4785	18.4851	10.9408	5.15424	30.0297	61.1015	48.7182	43.59	18.9372	44.9512	95.8077	75.7453
Koike_CLKBMAL1_P0239	RoP_Phase122	2_RantiP013	intergenic-10kbless	6.85623	72.478	4.89236	30.8167	1.80242	11.2585	Cyp2u1	10.755	22.158	8.409	5.566	11.127	13.009	14.21	21.363	6.674	6.55	3.089	12.192	11.511	7.665	3.07	3.903	5.007	8.265	10.556	5.905	2.991	4.981	5.895	6.972	0.904241	25.676	45.877	21.718	19.7921	10.1513	5.98725	36.0356	66.309	65.9129	59.3393	11.0467	21.1535	26.1294	68.1707
Koike_CLKBMAL1_P0244	RoP_Phase052	2_RantiP014	intron	6.69057	110.341	3.53796	40.1757	13.9567	10.264	Gm672	8.922	9.29	8.963	14.943	12.619	9.985	8.347	9.233	6.226	14.327	12.686	7.629	5.918	4.772	5.254	5.093	5.363	4.736	5.554	4.593	5.3	5.065	5.861	5.325	20.4436	37.4622	39.1326	18.6876	16.6366	8.1887	2.29078	69.0683	76.3768	57.3155	83.8269	22.0934	26.1214	60.9685	53.0217
Koike_CLKBMAL1_P0275	RoP_Phase068	2_RantiP015	intron	2.33707	95.1733	3.18609	43.0192	21.0796	4.81649	Ergic1	6.713	4.162	3.406	3.586	5.494	7.395	6.186	4.333	2.537	4.031	4.896	5.06	26.644	22.584	16.468	21.961	21.784	23.273	24.166	21.024	20.227	19.569	17.337	21.071	1.32559	36.3604	43.8018	21.6224	3.69701	11.9108	3.43616	72.0712	65.9618	48.805	20.1184	12.6248	39.6628	60.9686	30.2981
Koike_CLKBMAL1_P0316	RoP_Phase106	2_RantiP016	TSS	6.73323	28.4988	4.13614	30.8207	0.0191392	27.6429	Ppp1r3c	30.713	43.424	19.815	11.536	22.186	43.182	40.638	43.23	14.887	6.774	3.454	51.876	43.079	33.245	11.889	39.988	104.196	118.199	47.191	26.466	16.914	36.743	117.012	69.703	20.1697	24.2403	44.3947	18.0187	9.8587	3.72214	3.43616	7.55292	26.7319	34.3893	23.878	4.73429	15.5446	52.2588	53.0217
Koike_CLKBMAL1_P0323	RoP_Phase070	2_RantiP017	intron	6.5148	47.0939	3.7236	40.4966	21.3703	7.62516	5430407P10Rik	6.539	6.969	3.751	6.309	7.734	13.422	11.607	8.293	4.385	7.598	4.774	10.122	1.452	0.96	1.229	1.814	2.039	2.391	1.026	0.806	1.004	1.722	2.039	1.654	18.659	30.8512	40.7631	23.4243	8.68237	5.21099	3.43616	18.0178	30.5507	34.3893	30.1777	6.31239	15.8651	17.4196	22.7236
Koike_CLKBMAL1_P0335	RoP_Phase082	2_RantiP018	5' UTR	6.14473	31.3135	3.74041	23.6172	22.9231	10.5562	Nat10	10.368	12.694	5.644	7.915	8.749	15.983	15.936	12.667	6.35	9.79	5.399	15.181	2.553	1.956	1.844	3.269	2.758	2.722	2.606	1.601	2.13	2.721	3.235	3.244	18.9764	30.1167	43.2089	18.0187	6.77785	5.21099	4.00886	21.0208	30.5507	51.584	20.1184	3.82569	17.1472	34.8391	21.8055
Koike_CLKBMAL1_P0347	RoP_Phase030	2_RantiP019	intron	7.00933	82.8028	4.01306	39.2862	13.0627	7.77057	Klf13	4.347	4.871	6.746	20.558	7.981	6.089	2.608	2.858	3.016	18.309	11.789	4.076	1.32	2.132	2.889	2.687	1.627	1.368	1.639	2.714	3.623	3.773	1.303	1.325	10.7917	34.1567	38.3173	27.929	15.8523	8.41428	3.43616	36.0356	75.2196	68.5181	74.4789	29.9839	28.0444	69.6783	22.7236
Koike_CLKBMAL1_P0360	RoP_Phase090	2_RantiP020	intergenic-10kbless	3.18798	91.6381	4.72322	34.754	23.5994	15.7407	Ubc	23.934	15.562	13.578	8.125	11.751	24.212	20.203	13.73	17.675	11.29	9.454	19.374	32.778	65.913	52.375	59.051	34.621	39.724	30.036	47.392	57.707	89.277	56.843	69.047	13.0053	37.6959	39.9972	25.3354	18.8211	9.67755	4.58155	77.6222	89.9164	59.1392	60.0505	16.307	37.9	123.257	75.7453
Koike_CLKBMAL1_P0450	RoP_Phase007	2_RantiP021	intergenic-10kbless	6.70823	97.872	6.6096	32.8623	12.305	19.0696	Ahcy	5.439	12.15	18.72	51.764	7.304	15.638	9.214	11.08	20.829	29.464	33.105	14.13	361.112	545.089	705.285	585.106	703.74	499.025	374.212	524.794	589.085	717.209	676.562	505.853	14.0798	27.8128	24.4579	29.0347	21.7339	14.9788	4.07827	39.0386	97.9012	60.1813	80.4738	34.0965	40.5442	17.4196	7.57453
Koike_CLKBMAL1_P0516	RoP_Phase061	2_RantiP022	intron	7.60541	86.6359	4.96662	34.3192	14.7792	18.9494	Col27a1	18.341	11.972	12.878	31.498	27.936	17.164	13.874	4.463	17.009	26.202	29.03	17.027	1.133	3.613	5.714	9.375	6.792	6.764	1.571	3.6	5.694	10.862	6.963	4.045	14.9137	28.7143	27.7189	28.6798	14.3399	8.93313	4.58155	46.0455	72.558	77.7233	83.8269	7.89049	12.8203	34.8392	59.4485
Koike_CLKBMAL1_P0528	RoP_Phase114	2_RantiP023	intron	4.69736	60.8799	5.30948	31.6923	0.920208	8.68918	Slc4a4	12.311	8.103	9.486	6.335	6.327	9.474	13.024	8.438	9.554	5.239	8.676	7.303	14.895	13.923	9.23	9.145	12.129	13.349	14.695	16.472	12.822	7.019	9.519	12.696	2.78324	15.4256	38.1691	25.9906	10.7549	8.1887	1.71808	42.0415	53.4638	42.9866	26.8246	7.89049	13.2209	43.549	0
Koike_CLKBMAL1_P0536	RoP_Phase120	2_RantiP024	3' UTR	7.1666	45.648	4.0786	29.789	1.61433	5.03556	Rhou	6.923	6.727	5.905	2.796	4.278	7.277	6.777	8.135	3.655	2.074	2.466	3.414	21.748	30.242	16.798	20.954	25.531	23.904	18.648	25.44	24.965	16.304	22.514	20.836	3.70281	26.4439	31.4493	22.0729	10.4749	5.66216	3.15849	20.5658	30.5507	42.9866	26.8246	12.6248	15.8651	34.8392	22.7236
Koike_CLKBMAL1_P0544	RoP_Phase065	2_RantiP025	intron	3.83624	73.9623	3.7093	35.2711	19.6047	5.23134	Nup62	7.503	5.051	2.689	5.874	7.344	5.915	5.865	4.373	2.241	5.069	5.609	5.244	5.703	3.574	4.846	7.169	7.906	5.489	5.824	3.873	4.851	6.27	6.438	5.898	17.9156	29.4155	41.5784	22.5507	12.4354	8.93313	5.72694	80.3521	84.0145	55.8392	35.6645	16.833	30.6085	253.904	136.341
Koike_CLKBMAL1_P0558	RoP_Phase104	2_RantiP026	TSS	5.54728	83.8476	3.58644	32.8752	23.8802	11.7572	Abca8b	14.147	9.06	6.091	8.712	5.795	12.677	18.579	17.739	13.066	6.692	10.03	18.498	6.354	5.966	4.776	6.424	6.69	8.4	7.81	6.093	5.422	4.683	7.447	6.695	22.432	31.9531	26.0884	23.3697	9.24253	6.69985	6.66407	45.0445	83.6673	65.9129	33.5307	12.6248	18.5093	52.2587	45.4471
Koike_CLKBMAL1_P0598	RoP_Phase091	2_RantiP027	intergenic-10kbless	5.27687	49.8313	3.76951	17.1274	23.5994	15.7407	Ubc	23.934	15.562	13.578	8.125	11.751	24.212	20.203	13.73	17.675	11.29	9.454	19.374	32.778	65.913	52.375	59.051	34.621	39.724	30.036	47.392	57.707	89.277	56.843	69.047	13.0053	34.8245	28.1142	16.3806	15.5723	4.5568	5.15424	43.3155	71.9794	40.1209	39.424	22.4281	13.5415	101.086	68.1707
Koike_CLKBMAL1_P0599	RoP_Phase094	2_RantiP028	intron	5.01758	66.3255	4.30239	33.7796	23.6167	11.1613	Sh3pxd2a	20.377	13.282	9.028	11.931	7.884	14.829	18.973	10.335	3.648	6.432	7.266	9.95	2.264	3.199	2.148	3.964	9.571	7.903	4.472	2.609	3.07	3.926	5.684	4.244	19.3563	25.3421	37.502	22.7281	12.9022	9.67755	2.29078	33.0326	61.1015	51.3234	20.1184	14.7289	15.8651	43.5489	7.57453
Koike_CLKBMAL1_P0603	RoP_Phase001	2_RantiP029	TSS	4.70427	26.1238	4.51893	20.8344	12.0957	3.30618	Pdxk	1.937	2.737	5.052	7.108	4.913	2.212	1.814	1.172	2.306	5.923	2.237	2.262	9.011	9.878	19.011	15.818	12.993	10.997	8.627	12.939	15.802	19.198	13.731	13.682	13.1691	28.6476	26.3107	27.6696	10.8856	2.97771	2.86347	30.1207	30.5507	31.5235	19.6104	6.31239	10.5768	43.549	37.8726
Koike_CLKBMAL1_P0641	RoP_Phase036	2_RantiP030	intergenic-10kbless	5.28957	80.7096	3.15131	35.2262	13.2103	10.974	Serpina3n	3.181	8.496	10.219	24.85	11.13	5.677	8.003	8.684	7.021	12.225	25.985	6.217	261.012	112.868	142.273	187.602	127.204	150.411	279.745	124.091	122.812	165.071	123.911	295.819	23.8724	33.7227	25.1743	19.3701	10.4749	9.67755	4.00886	60.0593	42.0073	34.3893	57.0023	18.9372	13.2209	104.517	49.1197
Koike_CLKBMAL1_P0676	RoP_Phase016	2_RantiP031	intron	11.7922	32.2005	3.92005	15.2266	12.728	8.33933	Grn	4.099	6.397	10.26	10.253	11.242	6.636	4.654	6.28	4.992	19.606	8.276	7.377	43.29	34.803	36.324	44.624	39.168	33.402	36.144	34.13	43.569	39.676	47.179	39.738	15.9052	20.9348	22.8273	16.2578	11.147	5.21099	4.51213	27.0267	11.4565	42.9866	42.9803	23.3845	15.8651	95.8077	65.8754
Koike_CLKBMAL1_P0679	RoP_Phase045	2_RantiP032	intron	2.49044	25.9672	2.32392	23.8897	13.6797	4.75612	Abhd11	3.715	3.878	3.992	6.134	6.344	4.031	3.589	4.557	3.384	7.776	5.398	4.273	9.951	10.42	12.249	14.559	11.16	9.717	10.162	12.01	11.914	9.528	10.462	11.957	11.9553	38.564	26.0884	11.6303	6.16169	4.46656	1.14539	37.5826	20.9458	23.3604	20.1184	6.31239	13.2209	29.5605	7.57453
Koike_CLKBMAL1_P0698	RoP_Phase057	2_RantiP033	intron	2.47897	81.6107	5.29928	32.5358	14.3472	17.2868	Per2	6.623	9.17	11.663	25.409	34.175	21.052	9.298	4.411	14.899	35.029	22.63	13.083	0.805	4.416	6.841	8.985	3.786	1.779	0.973	4.814	6.343	10.011	3.007	1.72	12.2177	20.9348	36.0198	28.7207	15.1615	8.93313	5.50133	81.0801	61.1015	42.9866	53.6492	17.3591	42.307	43.549	30.2981
Koike_CLKBMAL1_P0711	RoP_Phase004	2_RantiP034	intron	6.23338	51.8256	2.8051	21.2127	12.1605	6.04997	Fbxo31	2.033	4.039	4.033	17.126	3.652	3.425	4.002	5.231	2.193	16.994	8.185	1.687	6.817	6.227	8.651	7.449	7.008	4.32	7.197	5.365	7.034	8.001	6.174	3.929	11.3067	30.8512	25.2484	15.9029	5.26544	5.95542	2.29078	33.0326	42.0073	21.1894	49.4832	15.781	23.7977	34.8392	22.7236
Koike_CLKBMAL1_P0768	RoP_Phase006	2_RantiP035	intron	7.7908	64.0773	6.18996	27.799	12.2646	27.0107	Nr1i2	13.832	20.453	26.296	48.887	25.063	28.635	21.219	20.822	25.393	49.339	16.967	27.223	13.022	17.447	24.292	25.571	19.018	19.808	12.251	18.54	27.944	24.425	19.135	21.059	13.0531	20.9348	14.6747	23.6427	16.9166	10.422	4.00886	21.0208	49.6449	48.7182	53.6492	12.6248	31.7303	52.2588	37.8726
Koike_CLKBMAL1_P0820	RoP_Phase031	2_RantiP036	intron	3.83889	60.414	5.37304	30.1915	13.0627	7.77057	Klf13	4.347	4.871	6.746	20.558	7.981	6.089	2.608	2.858	3.016	18.309	11.789	4.076	1.32	2.132	2.889	2.687	1.627	1.368	1.639	2.714	3.623	3.773	1.303	1.325	10.7917	16.9615	24.4579	22.81	10.2695	6.69985	3.74854	57.0564	44.4374	40.1209	25.7069	7.89049	9.77549	17.4196	7.57453
Koike_CLKBMAL1_P0857	RoP_Phase092	2_RantiP037	intron	3.43764	48.6324	6.25895	31.3294	23.6012	18.4938	Dapk1	25.683	18.174	7.275	12.861	17.382	21.429	28.899	29.055	13.768	12.015	13.559	21.825	11.785	7.588	7.414	12.196	16.072	17.036	11.095	8.214	8.352	10.551	19.274	14.295	19.7671	15.4256	29.6212	23.6837	17.2527	8.1887	4.00886	48.0475	38.1884	29.4393	13.4123	20.5153	10.5768	52.2588	37.8726
Koike_CLKBMAL1_P0864	RoP_Phase071	2_RantiP038	intergenic-10kbless	3.84844	74.1359	2.29489	30.1359	21.3965	9.71052	Ldha	12.719	8.772	6.737	9.73	10.041	11.076	11.522	10.444	6.091	9.11	9.266	11.019	319.747	232.829	175.952	223.275	298.124	280.101	318.372	240.727	263.611	173.835	209.232	333.101	23.9988	41.8027	24.0379	14.3467	6.38575	6.69985	4.21711	63.5173	56.1254	51.8445	30.1777	15.781	21.1535	95.8077	45.4471
Koike_CLKBMAL1_P0876	RoP_Phase027	2_RantiP039	intergenic-10kbless	8.27112	74.7374	7.14131	27.7004	12.8425	7.82813	Per1	0.831	1.197	8.198	16.824	8.697	4.835	1.24	0.451	5.542	30.439	8.082	7.601	0.169	1.476	2.973	2.606	1.158	0.458	0.177	1.169	3.441	2.154	0.518	0.358	11.3196	11.9866	24.4579	26.1271	17.2527	8.66243	2.29078	27.0267	36.9155	65.9129	57.0023	9.46859	15.8651	26.1294	22.7236
Koike_CLKBMAL1_P0879	RoP_Phase095	2_RantiP040	intron	6.50185	33.2067	2.95011	17.5076	23.6167	11.1613	Sh3pxd2a	20.377	13.282	9.028	11.931	7.884	14.829	18.973	10.335	3.648	6.432	7.266	9.95	2.264	3.199	2.148	3.964	9.571	7.903	4.472	2.609	3.07	3.926	5.684	4.244	19.3563	21.8029	27.4719	13.3366	9.42925	5.21099	3.43616	30.7577	22.6816	50.1945	20.1184	14.2029	11.8588	26.1294	22.7236
Koike_CLKBMAL1_P0909	RoP_Phase098	2_RantiP041	intergenic-10kbless	2.70387	55.5074	3.46113	26.7379	23.6483	16.2125	Rnf125	19.286	9.723	8.376	9.178	7.044	29.212	28.35	32.925	12.687	3.155	7.346	27.268	80.12	46.564	24.709	38.568	86.079	101.325	74.136	44.953	39.354	28.981	121.884	85.974	21.5643	29.4155	20.3815	18.8787	14.1719	8.1887	6.5773	53.4164	38.1884	28.6578	26.8246	11.0467	26.4419	95.8077	83.3197
Koike_CLKBMAL1_P0917	RoP_Phase075	2_RantiP042	TSS	6.98959	56.3387	3.45071	23.6684	21.7238	5.96588	Tjp3	8.708	5.81	2.824	3.712	7.465	11.393	11.006	4.032	2.285	3.167	3.482	7.706	5.075	3.863	1.792	4.698	6.964	6.934	5.09	3.187	2.987	4.274	5.824	6.628	20.8123	20.7678	24.4084	14.415	7.0766	2.23328	4.00886	22.4768	34.3696	57.3155	31.0921	15.1593	13.2209	43.549	15.149
Koike_CLKBMAL1_P0925	RoP_Phase078	2_RantiP043	intron	4.94659	26.3397	2.76649	19.7744	22.2599	53.3962	Cbs	62.419	52.427	13.282	48.323	63.73	74.176	75.714	94.373	9.698	42.507	38.808	65.298	142.189	97.652	78.247	83.7	87.543	131.242	130.077	91.447	72.956	73.118	97.898	144.756	23.9814	25.9097	31.1282	8.06746	5.2281	3.72214	3.10643	24.0237	15.2754	28.6578	10.0592	7.89049	15.8651	60.9685	31.2162
Koike_CLKBMAL1_P0998	RoP_Phase083	2_RantiP044	TSS	1.64069	44.6404	3.77348	22.893	23.1033	6.68401	Car14	9.77	8.988	3.316	4.409	6.087	10.267	11.003	5.539	3.83	7.132	3.478	6.389	17.546	21.531	11.063	11.993	19.887	21.872	15.912	18.549	13.377	8.728	16.99	15.043	0.578785	19.0316	31.3011	16.2987	7.71144	11.1664	5.11954	45.0445	48.6034	26.7472	36.2742	13.7725	29.0861	26.1294	30.2981
Koike_CLKBMAL1_P1040	RoP_Phase009	2_RantiP045	TSS	5.65019	87.8921	3.79016	24.8077	12.3525	13.3242	2310044G17Rik	8.98	11.111	13.072	23.18	14.453	10.122	11.656	8.664	12.354	22.109	15.784	8.404	8.171	7.522	13.299	9.869	10.811	7.734	7.641	9.14	12.115	11.538	9.573	7.767	12.4425	23.4055	19.5663	13.3912	8.01019	3.72214	1.14539	30.0297	72.558	63.0471	40.9481	7.89049	31.8104	43.549	53.0217
Koike_CLKBMAL1_P1125	RoP_Phase058	2_RantiP046	TSS	6.32902	37.9237	7.08502	9.02448	14.3472	17.2868	Per2	6.623	9.17	11.663	25.409	34.175	21.052	9.298	4.411	14.899	35.029	22.63	13.083	0.805	4.416	6.841	8.985	3.786	1.779	0.973	4.814	6.343	10.011	3.007	1.72	12.2177	12.5876	15.5147	16.3943	19.4373	5.14332	1.57925	28.7557	45.3632	37.3419	41.5578	12.6248	27.0829	26.1294	7.57453
Koike_CLKBMAL1_P1151	RoP_Phase108	2_RantiP047	intergenic-10kbless	8.29677	40.6758	4.1153	22.424	0.0340112	25.7026	Zfp36l1	27.321	23.122	14.847	18.149	18.938	29.958	48.904	29.755	32.158	14.89	18.763	31.626	29.927	40.531	35.18	47.483	47.655	54.686	33.065	43.726	38.161	55.109	56.672	50.391	17.5356	19.8329	17.1205	16.2305	7.39402	6.69985	4.1824	9.0089	31.2451	25.792	30.1777	12.6248	15.8651	45.9244	30.2981
Koike_CLKBMAL1_P1163	RoP_Phase110	2_RantiP048	intergenic-10kbless	4.34169	54.1512	4.2442	25.1237	0.250616	12.2374	Slc6a6	14.361	12.189	10.84	7.583	14.256	12.952	15.509	15.962	11.303	10.069	8.862	12.963	14.758	14.925	15.624	16.026	15.933	18.61	14.909	17.447	12.767	13.498	18.703	20.69	21.4251	16.3939	25.6931	13.0363	13.2383	5.54937	6.80291	39.0386	26.7319	31.5235	30.1777	13.629	18.5093	8.7098	30.2981
Koike_CLKBMAL1_P1189	RoP_Phase118	2_RantiP049	TSS	4.16421	50.0773	5.41462	22.2428	1.51306	25.9503	Slc22a1	31.47	37.206	36.523	9.875	23.391	31.612	37.079	22.415	24.198	17.038	14.264	26.334	96.811	97.424	98.344	92.88	102.036	101.627	85.166	110.129	116.698	89.426	88.43	97.937	7.9356	11.0183	20.5792	15.7664	9.27987	6.94799	2.34284	30.0297	42.0073	18.2368	30.8889	11.0467	18.5093	52.2588	30.2981
Koike_CLKBMAL1_P1206	RoP_Phase074	2_RantiP050	5' UTR	5.08209	47.6489	2.92348	24.6664	21.6576	15.2127	Pnrc1	16.387	11.896	8.373	12.052	18.302	25.958	20.394	17.753	11.06	7.136	8.178	25.062	26.441	13.055	12.664	28.049	36.988	46.762	25.089	13.917	14.484	25.826	54.977	46.423	19.9386	27.5457	18.4546	14.92	8.01019	8.1887	2.29078	34.8526	42.7016	20.2341	30.1777	9.80334	15.8651	44.6047	45.4472
Koike_CLKBMAL1_P1218	RoP_Phase072	2_RantiP051	intergenic-10kbless	4.79528	18.6246	2.5843	19.3139	21.3965	9.71052	Ldha	12.719	8.772	6.737	9.73	10.041	11.076	11.522	10.444	6.091	9.11	9.266	11.019	319.747	232.829	175.952	223.275	298.124	280.101	318.372	240.727	263.611	173.835	209.232	333.101	23.9988	28.4806	24.2602	11.5347	3.69701	3.54167	4.58155	11.1019	42.0073	20.0604	9.85601	7.89049	5.28838	23.754	7.57453
Koike_CLKBMAL1_P1260	RoP_Phase101	2_RantiP052	TSS	5.2865	32.0259	3.32081	24.4886	23.7928	6.99885	Itgb5	8.501	8.435	5.361	6.434	7.585	8.353	9.177	7.923	5.137	5.598	5.705	5.777	13.943	19.448	13.556	17.086	18.556	20.193	13.802	18.992	17.881	15.55	18.328	18.518	19.634	20.9348	27.7189	12.968	3.69701	8.93313	2.86347	33.0326	15.2754	22.9262	26.8246	6.31239	5.28838	17.4196	22.7236
Koike_CLKBMAL1_P1339	RoP_Phase093	2_RantiP053	intron	1.9961	31.3711	3.28801	17.3769	23.6012	18.4938	Dapk1	25.683	18.174	7.275	12.861	17.382	21.429	28.899	29.055	13.768	12.015	13.559	21.825	11.785	7.588	7.414	12.196	16.072	17.036	11.095	8.214	8.352	10.551	19.274	14.295	19.7671	20.868	24.7049	14.1966	6.16169	9.67755	3.71383	33.6696	15.2754	31.5235	23.4715	6.31239	29.0861	59.9128	30.2981
Koike_CLKBMAL1_P1360	RoP_Phase040	2_RantiP054	intron	6.64167	45.8091	5.74586	13.9908	13.4106	27.0692	Zbtb16	8.217	4.121	2.745	105.06	13.182	14.862	12.159	7.546	4.404	79.243	60.462	12.831	0.803	0.536	2.242	2.013	2.346	0.762	0.905	0.274	4.589	2.225	0.875	0.687	12.5454	12.1201	19.3686	18.6739	11.1844	6.69985	5.15424	45.5905	42.0073	58.0971	46.943	16.0201	15.8651	43.5489	53.0217
Koike_CLKBMAL1_P1388	RoP_Phase046	2_RantiP055	intergenic-10kbless	3.5984	44.5762	2.96788	15.0661	13.6958	43.2339	Slc39a14	26.126	33.045	41.822	47.047	60.056	28.414	32.232	38.858	31.526	66.286	88.262	25.132	28.083	27.143	34.976	37.314	30.413	24.508	28.17	28.073	31.211	31.5	24.563	29.908	12.0281	17.6293	18.4299	9.59632	9.8587	8.93313	5.15424	45.0445	20.4829	20.0604	33.5307	14.2029	18.5093	52.2587	30.2981
Koike_CLKBMAL1_P1390	RoP_Phase097	2_RantiP056	intron	5.76891	33.3294	4.02892	21.6979	23.6194	9.13082	Gstm1	11.065	11.633	3.323	1.917	10.011	13.973	17.71	16.773	3.091	4.447	1.686	13.942	374.977	712.165	538.22	517.033	408.033	380.27	348.442	741.127	660.604	523.876	531.686	410.824	9.22301	15.4256	27.4719	16.7082	5.37747	5.21099	1.14539	18.0178	27.7734	49.7603	13.4123	6.31239	14.1825	0	13.7719
Koike_CLKBMAL1_P1391	RoP_Phase067	2_RantiP057	intron	7.43756	22.411	4.52779	18.0164	19.6834	7.39629	Lrrc58	9.573	5.859	5.34	5.355	8.172	9.646	7.313	5.755	5.265	7.035	9.315	10.129	9.788	10.626	13.864	14.809	16.272	13.765	9.655	11.569	15.1	14.267	16.628	12.482	15.5294	15.1919	22.0121	15.7664	8.01019	2.23328	4.47742	9.0089	11.4565	25.4446	13.4123	7.89049	5.28838	0	0
Koike_CLKBMAL1_P1403	RoP_Phase050	2_RantiP058	intron	0.583229	33.9531	6.041	26.3708	13.703	31.1833	AK079188	26.587	18.532	17.19	45.783	33.969	11.572	20.137	27.541	35.706	43.783	61.675	31.724	5.42	2.676	6.668	2.95	3.948	3.184	5.808	3.081	3.924	3.911	5.838	3.875	23.5839	22.7044	13.4395	19.9571	11.091	14.1441	5.15424	27.0267	22.913	14.3289	20.2201	10.7598	29.0861	26.1294	22.7236
Koike_CLKBMAL1_P1457	RoP_Phase123	2_RantiP059	intron	3.84076	51.4497	4.76222	15.1972	1.90005	17.1231	Pard3	18.366	19.687	15.186	17.571	15.064	16.255	21.74	20.445	15.675	14.122	16.076	15.29	6.528	7.5	7.074	6.829	6.146	8.03	7.675	7.633	6.964	6.949	8.282	8.282	23.6423	8.81464	21.1968	13.8826	4.31318	3.72214	4.58155	39.0386	49.6449	45.8524	16.7654	11.0467	10.5768	17.4196	82.8607
Koike_CLKBMAL1_P1489	RoP_Phase032	2_RantiP060	intron	7.61811	43.4444	4.27659	20.0007	13.0627	7.77057	Klf13	4.347	4.871	6.746	20.558	7.981	6.089	2.608	2.858	3.016	18.309	11.789	4.076	1.32	2.132	2.889	2.687	1.627	1.368	1.639	2.714	3.623	3.773	1.303	1.325	10.7917	18.7311	20.2333	17.5682	6.16169	5.21099	5.03276	33.0326	15.2754	45.8524	36.8838	6.31239	13.2209	8.7098	15.1491
Koike_CLKBMAL1_P1505	RoP_Phase014	2_RantiP061	TSS	8.107	64.4774	9.15276	23.3803	12.4146	9.12945	Marveld1	6.622	6.858	11.143	14.334	12.166	8.105	7.602	3.964	9.127	15.816	8.027	5.789	8.836	10.8	20.22	21.021	15.555	10.967	7.392	12.227	17.344	17.722	14.293	10.842	13.1405	12.8547	8.96788	25.1852	19.1199	10.4445	5.15424	36.0356	19.0942	63.2208	57.0023	6.31239	21.1535	43.5489	22.7236
Koike_CLKBMAL1_P1507	RoP_Phase102	2_RantiP062	TSS	4.3715	43.366	6.26164	24.0015	23.7971	26.9451	Hsd17b2	49.613	33.373	23.085	12.064	27.829	27.875	33.786	27.301	22.066	11.882	23.685	30.782	145.884	60.765	58.531	51.418	56.033	72.056	126.739	54.008	48.147	57.403	77.372	78.76	0.859111	16.5274	16.3052	17.2952	12.9395	6.69985	2.91553	30.0297	30.5507	34.3893	20.1184	18.9372	18.5093	0	45.4472
Koike_CLKBMAL1_P1582	RoP_Phase003	2_RantiP063	intron	8.47006	33.4227	4.65587	23.9677	12.1474	9.07718	Tnks1bp1	6.623	8.89	9.923	14.212	12.804	6.381	6.093	8.256	5.793	15.311	9.614	5.026	4.695	8.254	7.705	8.429	6.705	5.248	5.234	8.452	7.89	8.658	6.723	4.84	11.1597	16.0266	19.3439	15.4524	6.57246	8.1887	5.10218	6.00593	7.63768	42.9866	16.7654	3.1562	10.096	17.4196	7.57453
Koike_CLKBMAL1_P1617	RoP_Phase020	2_RantiP064	intron	5.40198	40.2207	6.26568	13.2835	12.8334	22.9828	Gfra1	8.478	10.817	13.631	77.973	10.324	11.236	9.234	11.956	9.373	54.782	46.201	11.787	40.416	21.844	32.856	38.025	32.781	28.962	39.26	24.701	25.51	40.731	28.68	38.224	19.606	7.71281	14.5759	15.2749	6.16169	9.3843	6.24757	18.0178	30.5507	37.2551	20.1184	4.73429	15.8651	17.4196	7.57453
Koike_CLKBMAL1_P1631	RoP_Phase124	2_RantiP065	intron	6.06684	42.8665	8.19208	18.6657	1.90005	17.1231	Pard3	18.366	19.687	15.186	17.571	15.064	16.255	21.74	20.445	15.675	14.122	16.076	15.29	6.528	7.5	7.074	6.829	6.146	8.03	7.675	7.633	6.964	6.949	8.282	8.282	23.6423	11.0183	15.49	16.8038	9.24253	14.4374	3.21056	24.0237	38.1884	37.2551	27.1294	9.61205	15.8651	26.1294	15.1491
Koike_CLKBMAL1_P1648	RoP_Phase064	2_RantiP066	TSS	0.59783	55.6714	2.88588	14.9406	17.9433	4.45431	Asph	5.003	3.574	4.208	3.871	6.083	4.571	4.584	3.01	3.854	4.867	4.342	5.484	2.649	2.398	2.233	2.486	2.129	2.247	2.586	2.174	1.946	2.81	2.599	2.899	21.3004	17.9298	8.15262	9.45982	7.78613	6.69985	2.86347	36.0356	30.5507	20.5815	26.5198	11.0467	36.4578	87.0979	30.2981
Koike_CLKBMAL1_P1659	RoP_Phase028	2_RantiP067	intron	8.44403	49.6782	6.95152	20.8721	13.0248	44.5711	BC019819	6.584	12.082	33.391	122.185	21.176	21.094	17.677	7.247	51.861	90.464	133.827	17.266	55.712	60.15	254.76	133.55	98.369	30.538	67.144	52.295	227.645	155.897	56.332	34.088	11.3766	7.71281	24.4084	29.2667	15.9457	5.59448	1.71808	6.00593	53.4638	71.4707	73.3612	6.31239	10.5768	26.1294	7.57453
Koike_CLKBMAL1_P1681	RoP_Phase051	2_RantiP068	intron	4.52889	30.9529	4.48991	20.3715	13.9498	4.68227	Stim2	3.211	4.183	3.239	6.226	4.955	4.501	3.741	3.542	5.154	6.266	6.452	4.716	4.034	3.799	5.518	5.36	3.452	3.671	3.292	3.811	4.212	6.003	3.384	4.942	12.5825	14.3238	22.8273	12.6131	8.01019	6.69985	2.29078	21.0208	11.4565	8.59733	23.4715	7.89049	10.5768	0	15.1491
Koike_CLKBMAL1_P1696	RoP_Phase076	2_RantiP069	3' UTR	4.84466	37.5745	2.0877	13.7328	21.7495	5.81977	Mthfr	10.57	3.265	2.047	3.421	6.485	10.371	11.663	5.055	1.23	2.838	3.367	9.524	2.501	0.625	0.704	1.817	4.232	5.004	3.357	0.758	0.798	1.461	4.334	4.381	20.8438	18.7311	12.2289	4.60023	6.25504	5.95542	1.14539	25.4797	34.3696	20.0604	23.4715	3.1562	15.8651	52.2588	7.57453
Koike_CLKBMAL1_P1700	RoP_Phase112	2_RantiP070	intron	5.84239	44.0381	4.08958	21.5117	0.410797	12.0739	Grlf1	13.708	12.535	10.875	11.2	13.104	12.774	14.176	13.746	10.568	11.424	9.319	11.457	15.734	17.391	16.067	17.157	19.173	20.275	17.057	17.933	16.374	16.3	18.604	19.046	20.7226	19.8329	9.75844	11.3026	12.3234	6.69985	1.71808	9.0089	34.3696	28.6578	16.7654	10.951	15.8651	17.4196	15.1491
Koike_CLKBMAL1_P1725	RoP_Phase088	2_RantiP071	intron	8.84859	40.4991	3.4999	17.9879	23.2979	4.77083	Tor3a	6.136	6.477	3.85	4.034	4.953	6.932	5.427	5.263	2.719	3.005	2.861	5.595	2.256	1.795	0.734	1.348	4.374	1.248	2.13	1.412	2.145	1.011	3.029	1.461	19.8292	19.8329	19.3439	13.9645	9.24253	5.57193	5.83106	21.0208	15.2754	34.3893	30.1777	14.2029	13.2209	69.6783	15.1491
Koike_CLKBMAL1_P1766	RoP_Phase018	2_RantiP072	intron	5.60373	58.8553	4.34995	18.0895	12.8158	107.305	Alas1	95.671	19.539	83.285	264.266	75.996	25.718	41.003	11.456	157.928	198.432	275.392	38.976	27.123	31.419	216.786	51.054	48.392	16.731	54.027	117.295	203.865	51.505	10.27	33.616	9.47044	14.6243	16.3052	13.9781	3.86506	4.46656	4.00886	42.4055	67.4662	63.9155	20.1184	12.6248	9.37485	17.9475	22.7236
Koike_CLKBMAL1_P1775	RoP_Phase041	2_RantiP073	intron	7.91655	28.1822	3.09326	19.9152	13.4106	27.0692	Zbtb16	8.217	4.121	2.745	105.06	13.182	14.862	12.159	7.546	4.404	79.243	60.462	12.831	0.803	0.536	2.242	2.013	2.346	0.762	0.905	0.274	4.589	2.225	0.875	0.687	12.5454	16.5274	22.0121	5.55577	8.14089	5.21099	3.83531	21.2938	15.2754	31.5235	30.1777	9.46859	5.28838	17.4196	22.7236
Koike_CLKBMAL1_P1812	RoP_Phase113	2_RantiP074	intergenic-10kbless	4.37648	31.418	3.66491	12.3436	0.900263	17.457	Creg1	19.124	22.258	19.01	9.655	11.413	25.026	24.735	16.566	19.764	10.902	9.134	21.899	97.45	161.459	124.253	123.613	129.656	131.857	106.987	181.545	156.024	110.351	120.582	111.387	8.05642	15.4256	9.78314	10.743	8.01019	4.46656	2.93289	21.0208	22.913	25.792	16.7654	14.2029	13.2209	26.1294	25.937
Koike_CLKBMAL1_P1820	RoP_Phase119	2_RantiP075	TSS	5.3054	60.5348	2.3644	16.4828	1.59096	7.84502	C1rl	7.507	9.691	7.92	6.841	7.187	9.179	8.83	10.221	6.239	6.473	6.768	7.283	42.499	39.917	31.929	35.724	31.716	42.751	42.266	41.96	34.341	30.964	32.372	41.344	1.99668	18.7645	18.751	9.73283	3.86506	4.46656	5.15424	40.5856	66.8876	72.426	36.9854	11.0467	29.0861	87.0979	37.8726
Koike_CLKBMAL1_P1826	RoP_Phase047	2_RantiP076	intron	6.43281	39.8359	2.92025	21.3836	13.6958	43.2339	Slc39a14	26.126	33.045	41.822	47.047	60.056	28.414	32.232	38.858	31.526	66.286	88.262	25.132	28.083	27.143	34.976	37.314	30.413	24.508	28.17	28.073	31.211	31.5	24.563	29.908	12.0281	22.0366	19.0969	13.0636	7.39402	8.1887	2.86347	21.0208	34.3696	31.5235	26.8246	11.8596	5.28838	52.2587	53.0216
Koike_CLKBMAL1_P1830	RoP_Phase021	2_RantiP077	intron	2.64397	34.8493	3.52089	21.7651	12.8334	22.9828	Gfra1	8.478	10.817	13.631	77.973	10.324	11.236	9.234	11.956	9.373	54.782	46.201	11.787	40.416	21.844	32.856	38.025	32.781	28.962	39.26	24.701	25.51	40.731	28.68	38.224	19.606	14.3238	19.5663	10.3608	6.16169	5.95542	2.86347	39.0386	30.5507	11.4631	13.4123	1.5781	2.64419	8.70978	15.1491
Koike_CLKBMAL1_P1904	RoP_Phase084	2_RantiP078	intron	5.41785	34.3263	4.60028	16.5138	23.1033	6.68401	Car14	9.77	8.988	3.316	4.409	6.087	10.267	11.003	5.539	3.83	7.132	3.478	6.389	17.546	21.531	11.063	11.993	19.887	21.872	15.912	18.549	13.377	8.728	16.99	15.043	0.578785	11.0183	21.1968	13.009	6.16169	2.23328	2.29078	44.9535	15.2754	48.7182	20.1184	8.94256	10.5768	43.5489	15.1491
Koike_CLKBMAL1_P1934	RoP_Phase033	2_RantiP079	intron	8.3782	35.373	6.83263	11.6301	13.0627	7.77057	Klf13	4.347	4.871	6.746	20.558	7.981	6.089	2.608	2.858	3.016	18.309	11.789	4.076	1.32	2.132	2.889	2.687	1.627	1.368	1.639	2.714	3.623	3.773	1.303	1.325	10.7917	5.50915	8.15262	13.4731	5.54552	2.97771	2.86347	12.0119	26.7319	39.5998	40.2369	7.89049	0	35.367	15.1491
Koike_CLKBMAL1_P1935	RoP_Phase077	2_RantiP080	intron	11.0013	21.3208	3.57323	14.4162	22.112	12.2921	Stard13	11.406	12.988	8.664	11.544	11.918	13.578	15.698	14.481	9.063	9.584	11.695	16.886	4.211	3.296	2.903	4.526	4.794	4.822	4.323	2.84	2.585	4.737	5.675	4.926	19.6085	14.3238	7.33736	11.2617	6.77785	5.21099	2.95024	9.2819	15.2754	8.59733	23.4715	4.73429	13.2209	26.1294	22.7236
Koike_CLKBMAL1_P1983	RoP_Phase089	2_RantiP081	TSS	4.75493	38.2834	4.55622	19.4938	23.4476	13.5146	Hsd3b5	21.162	17.72	7.782	5.122	11.474	14.82	17.064	16.53	10.821	5.967	10.955	22.757	209.188	52.549	53.618	46.786	64.619	82.229	184.263	19.6	8.813	63.117	114.373	134.495	23.5765	17.6293	8.96788	16.2168	8.34628	5.95542	2.86347	27.0267	19.0942	17.1947	20.1184	13.6769	10.5768	8.7098	0
Koike_CLKBMAL1_P2026	RoP_Phase022	2_RantiP082	intron	1.07327	20.6631	5.2496	12.7804	12.8334	22.9828	Gfra1	8.478	10.817	13.631	77.973	10.324	11.236	9.234	11.956	9.373	54.782	46.201	11.787	40.416	21.844	32.856	38.025	32.781	28.962	39.26	24.701	25.51	40.731	28.68	38.224	19.606	9.91647	21.1968	12.8451	8.90644	8.1887	2.29078	41.9505	15.854	17.1947	29.7712	4.73429	15.8651	52.2588	37.8726
Koike_CLKBMAL1_P2036	RoP_Phase048	2_RantiP083	intron	5.16995	8.87462	2.70389	7.57265	13.6958	43.2339	Slc39a14	26.126	33.045	41.822	47.047	60.056	28.414	32.232	38.858	31.526	66.286	88.262	25.132	28.083	27.143	34.976	37.314	30.413	24.508	28.17	28.073	31.211	31.5	24.563	29.908	12.0281	16.3939	18.751	9.32331	1.62444	4.85006	3.43616	16.6528	25.1118	10.6815	13.4123	9.80334	14.8235	17.4196	37.6432
Koike_CLKBMAL1_P2038	RoP_Phase011	2_RantiP084	intron	7.31852	24.8059	6.38841	12.6109	12.3949	2.83433	Usp2	0.926	1.021	3.65	5.917	2.619	2.513	0.739	0.723	2.834	8.138	2.985	1.948	0.269	3.446	7.308	4.338	2.055	0.256	0.194	4.507	7.737	4.414	1.018	0.312	10.532	9.28208	13.563	24.5437	12.9022	2.23328	2.46432	21.0208	22.913	99.868	23.4715	9.46859	7.93257	17.4196	0
Koike_CLKBMAL1_P2041	RoP_Phase121	2_RantiP085	intergenic-10kbless	7.00948	33.2696	3.0563	14.529	1.71145	17.8235	Igsf5	18.149	20.642	18.307	15.225	18.031	20.023	20.98	21.626	16.413	14.697	12.39	17.397	7.321	7.424	7.182	6.896	7.262	7.421	7.455	6.271	7.207	7.448	8.051	6.806	18.6692	16.5274	13.8595	10.8112	4.892	3.72214	2.29078	15.0148	20.83	28.6578	16.7654	9.46859	13.2209	34.8392	7.57453
Koike_CLKBMAL1_P2049	RoP_Phase116	2_RantiP086	intron	4.15743	32.759	4.66004	23.1091	1.29358	15.1434	Foxn3	20.898	20.383	13.974	15.947	10.067	15.247	15.986	17.522	11.92	10.274	11.92	17.581	6.589	6.351	6.094	5.758	5.922	7.909	8.27	5.14	5.935	5.215	6.698	6.879	23.6258	12.1201	22.0121	14.8654	7.39402	6.69985	5.10218	27.4817	38.1884	31.5235	16.7654	12.6248	13.9421	52.2588	37.8726
Koike_CLKBMAL1_P2065	RoP_Phase079	2_RantiP087	intron	4.63084	39.4228	3.38604	13.281	22.2677	18.6351	Dbi	29.152	10.063	7.394	6.719	17.643	35.941	33.878	15.895	19.861	13.369	7.747	25.959	317.211	471.252	313.519	249.027	357.956	314.464	252.5	432.244	413.402	204.78	314.723	321.215	5.75636	16.5274	13.0936	9.18681	4.92935	2.97771	2.29078	29.7567	36.5683	28.1367	23.4715	4.35173	14.3427	69.6783	0
Koike_CLKBMAL1_P2117	RoP_Phase042	2_RantiP088	intron	5.87751	44.6312	5.32343	21.8322	13.4106	27.0692	Zbtb16	8.217	4.121	2.745	105.06	13.182	14.862	12.159	7.546	4.404	79.243	60.462	12.831	0.803	0.536	2.242	2.013	2.346	0.762	0.905	0.274	4.589	2.225	0.875	0.687	12.5454	15.4256	15.49	9.91028	11.3711	10.7152	4.00886	27.0267	32.1708	25.2709	30.1777	7.89049	10.5768	26.1294	22.7236
Koike_CLKBMAL1_P2137	RoP_Phase073	2_RantiP089	TSS	6.4854	36.1895	2.72198	11.3833	21.5017	10.3067	Tars	14.131	6.722	4.274	6.638	9.56	14.36	15.546	10.416	9.082	8.911	10.709	13.329	41.624	25.154	19.889	29.634	38.553	46.764	36.379	19.707	23.916	26.261	43.452	40.557	21.327	14.3238	13.7359	9.32331	3.08084	10.422	2.86347	33.0326	7.63768	42.9866	16.7654	7.89049	15.8651	26.1294	22.7236
Koike_CLKBMAL1_P2164	RoP_Phase037	2_RantiP090	intron	8.01374	44.4185	3.75511	16.5459	13.2695	31.3813	Sec14l4	18.149	23.186	23.197	59.301	33.571	33.852	22.107	26.343	18.782	61.948	31.422	24.718	42.77	50.267	52.776	59.66	57.635	53.263	52.139	42.128	52.249	57.448	50.107	59.663	16.5224	25.4089	22.2344	20.1482	7.97285	9.67755	2.22136	32.4866	32.1708	42.9866	52.4299	17.3591	15.5446	45.6604	22.7236
Koike_CLKBMAL1_P2207	RoP_Phase055	2_RantiP091	TSS	3.87739	41.5201	3.63338	18.5743	14.3029	50.6289	Cfb	33.136	38.073	42.359	41.832	82.31	40.654	43.595	25.191	53.783	83.321	85.215	38.077	456.12	214.199	254.447	318.583	293.323	295.062	446.37	239.402	240.465	303.912	318.993	361.427	23.0276	15.4256	13.4395	10.5655	8.62636	5.32378	4.21711	30.0297	15.2754	20.0604	30.1777	12.9595	16.5863	52.2588	40.8566
Koike_CLKBMAL1_P2216	RoP_Phase080	2_RantiP092	TSS	4.49226	42.521	6.0453	15.1808	22.2677	18.6351	Dbi	29.152	10.063	7.394	6.719	17.643	35.941	33.878	15.895	19.861	13.369	7.747	25.959	317.211	471.252	313.519	249.027	357.956	314.464	252.5	432.244	413.402	204.78	314.723	321.215	5.75636	10.9515	11.5866	8.36777	9.8587	4.46656	1.14539	30.1207	34.3696	31.5235	23.4715	9.46859	13.2209	69.6783	60.5962
Koike_CLKBMAL1_P2272	RoP_Phase096	2_RantiP093	intron	5.22656	49.7455	4.01243	20.2581	23.6167	11.1613	Sh3pxd2a	20.377	13.282	9.028	11.931	7.884	14.829	18.973	10.335	3.648	6.432	7.266	9.95	2.264	3.199	2.148	3.964	9.571	7.903	4.472	2.609	3.07	3.926	5.684	4.244	19.3563	17.6293	22.0121	11.9715	5.00404	4.91773	1.71808	39.0386	30.5507	42.9866	20.1184	18.9372	23.7977	34.8392	75.7453
Koike_CLKBMAL1_P2288	RoP_Phase115	2_RantiP094	intron	3.48145	43.4199	2.78553	15.3881	1.24403	16.3143	Hipk2	26.602	17.936	12.403	10.601	15.414	11.954	29.413	17.905	18.349	9.977	12.938	12.279	4.21	5.012	4.207	4.796	5.804	5.448	5.792	5.178	5.131	4.175	5.436	5.825	21.9789	17.6293	13.0442	9.44617	2.46467	7.44427	3.43616	33.0326	34.3696	20.0604	38.1031	17.3591	15.8651	60.9685	40.8565
Koike_CLKBMAL1_P2324	RoP_Phase005	2_RantiP095	intron	9.54769	26.1634	7.76967	10.9205	12.2004	5.93693	Tnfrsf1b	3.84	4.668	7.502	11.292	6.15	5.684	4.547	5.557	3.459	8.42	5.869	4.255	4.324	4.588	6.156	5.796	4.302	4.892	5.268	5.143	5.816	5.612	4.715	5.165	11.1137	6.61098	15.3912	17.0768	9.14917	9.67755	4.00886	34.4886	46.5204	52.105	49.6865	17.7895	11.1376	104.518	22.7236
Koike_CLKBMAL1_P2337	RoP_Phase117	2_RantiP096	intron	3.23643	41.8875	3.91793	12.2121	1.41244	2.7002	6430573F11Rik	6.513	3.451	2.447	1.049	0.524	2.992	4.701	3.726	2.896	0.673	0.904	2.526	2.811	1.826	1.337	0.843	2.651	1.533	3.117	1.669	1.38	0.554	1.62	1.286	1.31493	14.3238	10.5984	10.0877	7.11395	2.68445	1.71808	33.0326	42.0073	19.0183	22.2522	6.31239	13.2209	8.7098	37.8726
Koike_CLKBMAL1_P2342	RoP_Phase100	2_RantiP097	exon	4.90478	40.7452	4.80549	11.895	23.7617	2.96598	Slc22a15	3.034	3.927	2.187	1.723	1.561	6.369	5.916	3.612	1.666	1.347	1.326	2.924	1.816	2.542	1.867	2.275	2.233	2.399	1.421	2.973	2.487	2.205	2.615	1.727	11.5242	8.84803	19.3439	11.2753	4.31318	3.72214	0.624757	42.0415	16.3169	31.5235	20.1184	10.9989	10.5768	26.1294	22.7236
Koike_CLKBMAL1_P2350	RoP_Phase053	2_RantiP098	intergenic-10kbless	8.91168	30.3628	4.94449	12.7823	14.0352	43.1649	Hp	14.39	22.126	49.106	45.911	96.773	21.384	36.59	18.97	26.056	84.233	70.552	31.886	4815.57	893.519	915.844	1357.01	1397.73	1183.44	4334.08	1161.6	1018.64	1102.39	1156.7	3131.68	0.79336	7.71281	17.4911	8.90015	9.8587	4.5568	4.06092	13.3769	22.913	37.2551	34.3436	6.31239	18.5093	69.6784	60.5962
Koike_CLKBMAL1_P2355	RoP_Phase109	2_RantiP099	intron	4.26427	26.6383	3.84442	14.7898	0.121849	6.22935	Nrip1	7.716	5.972	5.811	4.395	5.047	7.228	7.839	6.58	6.029	6.258	5.746	6.13	1.656	1.975	2.065	2.28	3.022	3.195	2.183	2.241	2.17	2.166	3.385	3.312	19.4441	13.5892	16.3052	9.00935	5.54552	2.97771	3.24526	21.0208	15.2754	22.9262	3.35307	1.5781	5.28838	0	4.59063
Koike_CLKBMAL1_P2454	RoP_Phase010	2_RantiP100	intron	10.219	43.4909	5.66797	17.5357	12.3525	13.3242	2310044G17Rik	8.98	11.111	13.072	23.18	14.453	10.122	11.656	8.664	12.354	22.109	15.784	8.404	8.171	7.522	13.299	9.869	10.811	7.734	7.641	9.14	12.115	11.538	9.573	7.767	12.4425	8.81464	13.8595	13.2137	9.20518	2.97771	3.05437	15.0148	15.2754	20.0604	40.2369	6.31239	15.8651	0	22.7236
Koike_CLKBMAL1_P2503	RoP_Phase099	2_RantiP101	TSS	3.11814	34.3322	3.24992	16.5998	23.6483	16.2125	Rnf125	19.286	9.723	8.376	9.178	7.044	29.212	28.35	32.925	12.687	3.155	7.346	27.268	80.12	46.564	24.709	38.568	86.079	101.325	74.136	44.953	39.354	28.981	121.884	85.974	21.5643	12.8881	12.7477	7.45319	4.38787	3.72214	2.86347	24.0237	12.0351	28.6578	8.23027	11.0467	10.5768	0	7.57453
Koike_CLKBMAL1_P2505	RoP_Phase038	2_RantiP102	intron	5.87937	34.4818	10.2937	11.2694	13.3118	18.3968	Cyp3a13	3.661	11.19	15.792	21.7	19.452	18.976	10.189	11.307	24.168	38.397	20.789	25.141	48.808	34.691	49.715	61.659	51.346	36.273	42.014	37.79	41.447	58.393	53.39	59.166	16.4137	7.71281	4.07631	13.9645	12.3234	5.95542	3.43616	21.0208	30.5507	42.9866	13.4123	7.89049	2.64419	43.549	16.2967
Koike_CLKBMAL1_P2509	RoP_Phase012	2_RantiP103	intron	7.39997	40.5573	8.56812	13.5215	12.3949	2.83433	Usp2	0.926	1.021	3.65	5.917	2.619	2.513	0.739	0.723	2.834	8.138	2.985	1.948	0.269	3.446	7.308	4.338	2.055	0.256	0.194	4.507	7.737	4.414	1.018	0.312	10.532	7.71281	10.4255	24.9805	12.286	3.49655	1.71808	24.0237	45.8261	71.297	39.2208	12.6248	10.2563	17.4196	0
Koike_CLKBMAL1_P2563	RoP_Phase023	2_RantiP104	intergenic-10kbless	9.22744	20.4643	5.16566	10.5061	12.8334	22.9828	Gfra1	8.478	10.817	13.631	77.973	10.324	11.236	9.234	11.956	9.373	54.782	46.201	11.787	40.416	21.844	32.856	38.025	32.781	28.962	39.26	24.701	25.51	40.731	28.68	38.224	19.606	7.71281	12.2289	10.9068	5.34013	1.33095	1.71808	3.00297	7.63768	31.5235	13.4123	1.5781	15.8651	0	7.57453
Koike_CLKBMAL1_P2586	RoP_Phase111	2_RantiP105	intron	3.27106	21.8979	3.27183	11.3413	0.31473	5.37229	Dph1	6.212	5.214	5.304	3.942	5.316	6.305	6.648	5.715	5.167	5.392	3.349	5.903	6.843	5.498	5.335	6.617	5.235	5.683	6.24	5.371	5.051	4.273	5.178	6.828	0.497676	16.4607	24.112	9.00935	7.39402	5.21099	5.15424	27.0267	38.3041	11.4631	10.0592	7.221	10.737	34.8392	60.5962
Koike_CLKBMAL1_P2618	RoP_Phase085	2_RantiP106	intron	22.674	19.1851	2.04781	11.3406	23.116	10.2264	Camk1d	9.822	9.191	9.016	6.133	7.742	19.858	14.084	15.877	5.902	4.357	4.233	16.502	3.841	7.667	3.678	2.594	4.993	6.655	2.984	7.127	2.925	2.565	5.88	6.391	0.820688	15.9598	8.96788	7.58969	5.56419	4.78238	3.3841	24.2967	19.0942	5.73155	3.35307	12.6248	10.8973	34.8392	7.57453
Koike_CLKBMAL1_P2621	RoP_Phase002	2_RantiP107	intron	3.93963	50.2917	5.83931	14.4232	12.1163	5.29877	Aifm2	3.512	3.577	7.031	7.779	4.404	5.997	4.409	3.858	4.545	9.464	5.282	3.728	2.848	4.975	5.932	5.344	6.306	3.346	2.716	6.229	7.56	5.279	3.974	3.715	11.3873	5.50915	13.8595	11.1525	7.86082	4.46656	3.43616	33.0326	19.0942	29.9604	26.8246	14.2029	21.1535	26.1294	15.1491
Koike_CLKBMAL1_P2643	RoP_Phase008	2_RantiP108	intergenic-10kbless	7.41749	59.2116	8.35462	19.419	12.305	19.0696	Ahcy	5.439	12.15	18.72	51.764	7.304	15.638	9.214	11.08	20.829	29.464	33.105	14.13	361.112	545.089	705.285	585.106	703.74	499.025	374.212	524.794	589.085	717.209	676.562	505.853	14.0798	8.81464	15.0206	12.6404	12.9395	7.51195	5.25837	38.4016	22.913	65.2181	46.943	4.73429	10.5768	8.7098	7.57453
Koike_CLKBMAL1_P2644	RoP_Phase054	2_RantiP109	intergenic-10kbless	8.66921	39.0683	5.07073	13.0549	14.2922	7.37767	B4galt5	6.808	4.382	6.705	10.864	10.761	7.85	6.242	5.637	4.458	12.402	6.437	5.986	3.194	4.04	6.962	5.304	5.745	3.105	3.615	5.944	5.335	7.455	4.797	6.296	13.015	12.1201	10.5984	12.1626	8.36495	3.72214	1.61396	21.0208	26.7319	32.1314	40.2369	11.5727	18.5093	34.8392	22.7236
Koike_CLKBMAL1_P2670	RoP_Phase019	2_RantiP110	intron	6.26338	30.0153	2.77224	8.92896	12.8158	107.305	Alas1	95.671	19.539	83.285	264.266	75.996	25.718	41.003	11.456	157.928	198.432	275.392	38.976	27.123	31.419	216.786	51.054	48.392	16.731	54.027	117.295	203.865	51.505	10.27	33.616	9.47044	12.1201	8.15262	6.90717	4.4999	2.97771	2.29078	27.0267	7.63768	31.5235	13.4123	9.46859	2.64419	52.2588	22.7236
Koike_CLKBMAL1_P2693	RoP_Phase087	2_RantiP111	TSS	4.68664	38.3199	5.5114	10.6214	23.2287	4.65448	Hectd2	6.495	4.27	2.069	1.61	2.44	8.499	11.394	5.593	2.574	1.996	1.763	7.15	5.208	11.398	9.893	10.449	7.805	13.327	5.886	13.93	13.273	7.707	6.168	5.32	8.98973	8.81464	9.78314	8.58618	6.77785	2.23328	1.73544	30.0297	30.5507	20.0604	23.5731	4.73429	7.93257	17.4196	15.1491
Koike_CLKBMAL1_P2710	RoP_Phase034	2_RantiP112	intron	9.4721	31.1079	7.75302	17.427	13.0627	7.77057	Klf13	4.347	4.871	6.746	20.558	7.981	6.089	2.608	2.858	3.016	18.309	11.789	4.076	1.32	2.132	2.889	2.687	1.627	1.368	1.639	2.714	3.623	3.773	1.303	1.325	10.7917	4.40732	15.49	18.2098	11.091	5.21099	2.86347	3.00297	19.0942	34.3893	26.8246	11.0467	13.2209	17.4196	22.7236
Koike_CLKBMAL1_P2715	RoP_Phase049	2_RantiP113	intron	23.4954	43.1337	4.32201	10.3287	13.6958	43.2339	Slc39a14	26.126	33.045	41.822	47.047	60.056	28.414	32.232	38.858	31.526	66.286	88.262	25.132	28.083	27.143	34.976	37.314	30.413	24.508	28.17	28.073	31.211	31.5	24.563	29.908	12.0281	15.4256	22.9014	9.88298	4.92935	3.72214	4.58155	48.0475	38.1884	22.9262	33.5307	26.3973	39.6628	69.1505	53.0217
Koike_CLKBMAL1_P2767	RoP_Phase086	2_RantiP114	intron	11.5039	36.6279	9.48424	13.2373	23.116	10.2264	Camk1d	9.822	9.191	9.016	6.133	7.742	19.858	14.084	15.877	5.902	4.357	4.233	16.502	3.841	7.667	3.678	2.594	4.993	6.655	2.984	7.127	2.925	2.565	5.88	6.391	0.820688	7.37892	7.97968	9.32331	14.788	5.95542	2.86347	18.0178	7.63768	30.3078	42.6755	11.0467	15.8651	17.4196	16.5262
Koike_CLKBMAL1_P2831	RoP_Phase103	2_RantiP115	intron	1.70809	29.0968	3.71214	10.7501	23.7971	26.9451	Hsd17b2	49.613	33.373	23.085	12.064	27.829	27.875	33.786	27.301	22.066	11.882	23.685	30.782	145.884	60.765	58.531	51.418	56.033	72.056	126.739	54.008	48.147	57.403	77.372	78.76	0.859111	15.4256	6.99149	9.00935	4.92935	3.0905	2.46432	30.0297	26.7319	23.7078	25.4021	14.2029	23.7977	60.9686	22.7236
Koike_CLKBMAL1_P2924	RoP_Phase013	2_RantiP116	intergenic-10kbless	7.8136	40.745	2.65574	10.4924	12.3949	2.83433	Usp2	0.926	1.021	3.65	5.917	2.619	2.513	0.739	0.723	2.834	8.138	2.985	1.948	0.269	3.446	7.308	4.338	2.055	0.256	0.194	4.507	7.737	4.414	1.018	0.312	10.532	12.1201	10.5984	5.40561	4.31318	2.23328	2.37755	9.0089	30.5507	42.9866	30.1777	6.7906	23.7977	34.8392	30.2981
Koike_CLKBMAL1_P2948	RoP_Phase059	2_RantiP117	intron	9.60983	29.908	2.82632	11.1508	14.3472	17.2868	Per2	6.623	9.17	11.663	25.409	34.175	21.052	9.298	4.411	14.899	35.029	22.63	13.083	0.805	4.416	6.841	8.985	3.786	1.779	0.973	4.814	6.343	10.011	3.007	1.72	12.2177	8.81464	11.5619	7.18018	2.10991	0.744427	4.58155	9.0089	7.63768	38.7314	45.0125	14.0594	15.8651	17.4196	15.3786
Koike_CLKBMAL1_P3018	RoP_Phase107	2_RantiP118	TSS	7.45935	31.4001	3.42695	9.77718	0.0191392	27.6429	Ppp1r3c	30.713	43.424	19.815	11.536	22.186	43.182	40.638	43.23	14.887	6.774	3.454	51.876	43.079	33.245	11.889	39.988	104.196	118.199	47.191	26.466	16.914	36.743	117.012	69.703	20.1697	8.18025	12.7724	5.99258	3.08084	2.97771	1.14539	15.0148	17.1269	34.3893	16.7654	3.1562	10.5768	8.70978	22.7236
Koike_CLKBMAL1_P3066	RoP_Phase062	2_RantiP119	intron	8.68785	46.0922	6.7165	10.9294	14.9528	17.7521	Pdia5	20.09	8.408	14.313	31.242	35.612	12.424	11.418	10.853	8.256	20.148	28.246	12.013	18.987	8.066	10.085	10.615	8.792	10.02	17.104	8.794	8.264	16.133	15.713	17.621	22.3151	4.90815	10.2031	9.29601	5.67622	7.44427	1.71808	12.0119	26.7319	28.6578	36.8838	12.6248	10.5768	17.4196	7.57453
Koike_CLKBMAL1_P3071	RoP_Phase060	2_RantiP120	intron	7.08224	42.319	7.37249	8.94702	14.6367	2.51241	Lonrf1	2.119	0.634	1.28	4.535	2.357	1.815	1.242	0.845	1.918	3.694	8.511	1.2	1.007	1.215	3.561	1.308	1.471	1.138	1.097	1.801	2.277	2.042	1.286	0.962	10.7185	4.40732	3.26105	8.55888	6.75918	2.23328	1.35364	27.0267	15.2754	37.2551	24.7924	11.0467	5.28838	0	5.73827
Koike_CLKBMAL1_P3079	RoP_Phase044	2_RantiP121	intron	2.5226	46.9833	6.66827	9.62265	13.6671	16.2248	Prkag2	13.66	14.731	13.497	25.938	17.866	17.159	13.605	13.04	12.748	22.006	16.224	14.223	3.065	3.285	3.841	3.872	3.251	3.435	2.777	4.044	3.424	3.895	3.59	2.677	11.8539	5.50915	10.9937	8.10841	6.64715	3.92516	2.204	40.8586	15.2754	25.792	26.8246	7.89049	18.5093	17.4196	0
Koike_CLKBMAL1_P3093	RoP_Phase017	2_RantiP122	TSS	5.00671	40.98	7.66439	7.91132	12.7976	8.60379	4933426M11Rik	6.043	7.525	9.219	10.539	8.416	7.687	6.71	8.029	6.341	14.268	10.942	7.526	7.225	8.226	9.94	9.534	8.341	7.745	8.042	9.354	10.631	8.339	8.034	7.204	10.6104	0	7.33736	6.30654	4.12646	4.98541	4.5989	18.0178	34.3696	8.59733	26.8246	3.1562	10.5768	52.2587	7.57453
Koike_CLKBMAL1_P3101	RoP_Phase066	2_RantiP123	intron	3.06331	38.736	4.85305	8.65854	19.6047	5.23134	Nup62	7.503	5.051	2.689	5.874	7.344	5.915	5.865	4.373	2.241	5.069	5.609	5.244	5.703	3.574	4.846	7.169	7.906	5.489	5.824	3.873	4.851	6.27	6.438	5.898	17.9156	22.3037	30.2141	21.4177	12.8649	5.18843	3.47087	76.8032	64.6889	52.4524	26.3166	10.8554	25.9611	251.792	104.896
Koike_CLKBMAL1_P3207	RoP_Phase035	2_RantiP124	intron	9.26841	29.8186	7.32515	7.2697	13.0627	7.77057	Klf13	4.347	4.871	6.746	20.558	7.981	6.089	2.608	2.858	3.016	18.309	11.789	4.076	1.32	2.132	2.889	2.687	1.627	1.368	1.639	2.714	3.623	3.773	1.303	1.325	10.7917	27.5124	29.7447	24.9805	17.0847	8.93313	3.59235	35.3986	50.8022	63.2208	72.3451	23.1454	22.1952	63.6079	22.7236
Koike_CLKBMAL1_P0019	AR_G001	3_AR001	intron	6.98946	156.403	4.89281	108.457	9.48085	8.13988	Rapgef1	7.567	9.168	11.43	9.263	8.386	7.389	6.577	7.557	7.097	9.618	7.212	6.414	6.263	8.231	8.382	7.598	6.588	6.249	6.446	9.164	8.202	7.59	6.775	6.381	9.29553	73.8226	83.1073	61.714	49.2935	29.7771	10.8812	90.089	84.0145	117.497	110.651	41.0306	60.8164	156.776	106.043
Koike_CLKBMAL1_P0035	AR_G002	3_AR002	intron	3.83008	135.239	3.92895	70.7826	6.09465	19.2265	2900026A02Rik	14.051	25.005	27.614	22.319	21.005	21.786	19.402	25.369	12.014	20.055	8.431	13.668	11.099	20.798	12.244	14.077	13.708	11.87	12.408	20.393	13.863	16.673	13.944	15.795	7.88757	72.7208	71.496	48.3092	31.9474	16.7835	7.74004	102.101	110.746	90.3154	67.0615	18.9372	47.5954	51.203	37.8726
Koike_CLKBMAL1_P0044	AR_G003	3_AR003	TSS	4.01259	103.231	3.09411	78.5261	7.7958	11.6791	Adh5	9.29	10.131	15.196	12.701	10.502	11.655	12.165	13.117	13.897	12.572	8.253	10.669	143.392	164.335	191.871	178.129	185.6	163.893	141.126	169.446	184.489	185.532	169.244	166.012	13.2652	94.7573	57.0683	46.8486	27.7276	14.8209	7.28883	81.0801	72.558	95.0048	23.4715	12.6248	36.3776	73.1095	45.4472
Koike_CLKBMAL1_P0055	AR_G004	3_AR004	intergenic-10kbless	5.84982	89.2206	3.60932	60.1013	12.9827	10.2275	Slc25a39	9.348	10.828	9.305	11.177	9.682	10.57	9.859	8.844	8.426	15.694	9.318	9.677	122.024	115.556	124.053	123.778	126.352	107.213	102.926	121.317	135.833	124.146	123.669	110.146	12.2268	65.0079	54.6225	37.8393	20.9497	12.6553	5.72694	45.0445	61.1015	54.4497	57.0023	20.5153	42.307	60.9685	45.4472
Koike_CLKBMAL1_P0058	AR_G005	3_AR005	intron	5.30024	99.4147	4.22593	85.7392	16.7257	5.381	Memo1	2.705	4.104	5.2	3.507	4.085	6.907	5.528	3.915	9.1	5.428	5.446	8.648	12.179	9.554	11.155	14.427	12.717	12.163	11.039	10.127	11.492	11.037	11.215	11.386	17.2467	65.0079	79.0804	54.0561	22.3688	7.44427	2.86347	54.0534	68.7391	89.7943	30.1777	3.1562	21.1535	17.4196	37.8726
Koike_CLKBMAL1_P0069	AR_G006	3_AR006	intron	6.19624	101.69	4.5673	65.5895	2.64354	8.63248	Hdac11	8.295	8.44	9.635	11.743	8.229	10.131	11.793	11.012	5.419	7.27	5.309	6.313	13.083	21.075	14.319	12.945	14.334	15.211	13.273	22.162	15.401	11.068	14.268	18.225	4.62562	52.8878	60.0576	49.2375	25.1509	10.422	4.58155	45.0445	92.578	85.9733	49.28	16.3548	23.7977	60.9685	50.2673
Koike_CLKBMAL1_P0074	AR_G007	3_AR007	TSS	4.59811	81.7571	4.77612	54.567	9.0185	7.87191	Junb	3.824	6.084	22.699	9.7	5.974	4.683	5.954	4.929	12.194	4.468	8.623	5.331	5.465	10.133	2.44	2.335	4.66	3.526	5.128	12.444	3.815	5.799	7.22	2.747	5.31974	34.1567	57.0683	35.0136	17.9622	10.0159	6.14344	66.0653	34.3696	67.9971	46.943	4.73429	21.1535	26.1294	37.8726
Koike_CLKBMAL1_P0075	AR_G008	3_AR008	TSS	4.31952	96.919	3.83352	52.1619	3.7484	22.425	Pcx	22.956	31.315	26.105	19.91	19.794	21.291	23.943	21.371	19.067	20.82	23.688	18.84	58.127	92.385	59.107	71.188	84.176	79.692	60.026	97.988	112.51	65.883	74.006	69.426	9.10315	51.786	55.4378	38.7402	16.0017	15.633	6.87233	51.0504	86.9076	88.8391	36.8838	14.5855	64.8227	65.9833	37.8726
Koike_CLKBMAL1_P0086	AR_G009	3_AR009	exon	5.27526	83.4585	2.76727	48.8451	12.8039	8.41071	Gorasp1	8.579	8.775	8.739	11.461	9.87	8.594	8.225	6.824	6.101	10.27	7.706	5.785	8.843	7.201	8.466	7.038	6.095	5.846	9.034	7.516	8.03	7.639	5.936	7.3	6.08323	69.5488	45.8029	27.4785	14.0412	6.69985	4.58155	60.0593	104.729	83.1944	50.2961	23.6715	25.881	176.571	75.7453
Koike_CLKBMAL1_P0099	AR_G010	3_AR010	intron	5.84865	132.486	4.2616	52.2924	10.0868	13.2775	Mgrn1	11.061	15.089	14.49	16.836	13.203	12.503	12.12	14.69	9.39	18.006	11.42	10.521	9.561	10.436	9.17	9.522	8.605	8.618	9.905	11.885	10.178	10.131	9.889	9.484	7.06003	51.786	56.2531	37.9621	29.4827	13.7606	4.00886	111.11	84.0145	131.826	90.533	23.6715	31.7303	191.615	90.8943
Koike_CLKBMAL1_P0128	AR_G011	3_AR011	intergenic-10kbless	4.97074	107.648	4.44153	44.7745	4.44477	25.173	Agmat	22.276	33.6	27.531	27.556	21.041	26.961	26.453	36.485	17.293	27.926	14.379	20.573	48.281	56.215	56.162	59.191	52.331	49.375	43.873	58.295	56.847	55.174	48.535	44.456	10.7538	51.786	41.5784	45.9613	25.8417	17.8663	8.27803	69.0683	118.384	92.7469	73.7676	33.1401	38.3808	113.227	60.5962
Koike_CLKBMAL1_P0130	AR_G012	3_AR012	TSS	5.93226	76.7649	5.03835	56.5818	4.96467	5.35133	Nptn	4.919	5.154	5.732	4.103	4.055	5.579	5.574	4.847	7.87	5.518	4.519	6.346	6.771	6.531	7.607	7.418	6.66	6.684	6.146	7.402	8.094	7.163	5.814	6.562	10.1687	30.8512	43.2089	31.9832	21.5659	14.1441	6.21286	30.0297	53.4638	65.9129	26.8246	7.89049	21.1535	34.8392	22.7236
Koike_CLKBMAL1_P0141	AR_G013	3_AR013	intron	4.10639	63.5655	3.20702	47.4848	4.6423	5.5171	Klb	2.114	10.595	6.183	2.759	5.128	4.391	3.778	10.126	4.471	6.796	2.078	7.785	4.84	9.521	5.394	6.437	5.789	7.48	4.565	9.804	6.153	6.4	7.727	5.548	7.78317	52.8878	48.2734	27.028	11.7072	9.33918	4.00886	54.0534	46.5204	48.7182	26.8246	4.73429	21.1535	52.2588	22.7236
Koike_CLKBMAL1_P0142	AR_G014	3_AR014	TSS	7.01856	46.7342	3.3085	45.0567	19.182	5.38044	Paics	3.825	4.569	3.894	5.61	4.814	7.356	5.77	5.368	4.446	5.629	5.08	8.203	55.7	54.682	67.415	56.998	53.215	61.526	51.08	60.274	53.239	53.907	55.603	58.806	8.81817	46.544	43.4806	25.0214	18.6904	11.9108	4.91128	35.9446	39.6928	74.8575	36.8838	9.99462	30.6085	52.2588	53.0217
Koike_CLKBMAL1_P0145	AR_G015	3_AR015	intron	6.65188	86.5644	3.55509	47.6513	21.0555	4.26659	Fdft1	3.095	3.778	4.266	3.021	4.832	10.206	4.837	3.935	3.297	4.207	1.436	4.29	14.219	23.943	14.689	19.99	15.552	21.882	14.193	22.024	16.604	28.665	20.223	18.923	13.7838	35.2585	48.9157	21.6224	11.091	12.6553	4.58155	48.0475	57.2826	54.4497	60.3553	17.3591	7.93257	60.9685	22.7236
Koike_CLKBMAL1_P0147	AR_G016	3_AR016	TSS	5.82263	92.4475	3.06287	48.812	17.4728	6.60291	Dvl2	6.579	6.293	5.81	6.506	6.711	7.438	7.183	5.59	5.542	8.228	6.848	6.507	30.501	36.587	32.563	33.624	35.611	33.54	29.568	35.585	36.473	33.431	32.625	32.788	11.1945	52.8544	41.5784	26.1271	11.091	9.40685	4.54684	36.0356	76.3768	57.3155	46.943	12.6248	29.0861	95.8077	68.1707
Koike_CLKBMAL1_P0156	AR_G017	3_AR017	3' UTR	5.2412	46.377	3.4307	34.239	7.74237	5.43578	Mtif3	4.343	6.974	6.873	5.658	5.183	5.939	5.516	4.891	5.456	6.557	3.933	3.904	11.117	10.253	11.543	11.108	11.896	9.906	9.852	12.551	10.504	10.884	9.633	9.683	9.76917	56.427	57.8836	27.5331	12.3234	4.46656	5.25837	24.0237	64.9203	37.2551	40.2369	9.46859	23.7977	43.5489	37.8726
Koike_CLKBMAL1_P0158	AR_G018	3_AR018	intron	3.6615	67.6977	3.59596	36.3947	7.18084	3.55057	Pdk1	2.924	2.989	6.156	2.532	2.621	4.535	3.108	2.132	6.781	2.994	1.874	3.961	4.653	20.482	17.385	14.692	17.733	16.709	5.157	21.39	22.771	14.934	14.25	10.11	11.1307	45.0748	47.1123	31.9149	19.0265	12.5876	4.75509	75.0742	93.7352	54.4497	46.943	20.5153	22.5958	78.3881	98.4689
Koike_CLKBMAL1_P0172	AR_G019	3_AR019	intron	8.25471	74.6492	4.77711	36.5691	11.9714	4.84682	Pptc7	3.13	4.172	5.459	10.248	2.808	4.832	3.041	3.796	4.012	6.956	4.593	5.115	4.756	3.719	4.809	3.84	3.801	3.502	3.514	4.333	4.269	4.172	3.484	3.61	8.54735	33.0215	37.502	31.4918	14.452	11.5048	2.29078	48.0475	45.8261	61.5708	72.7515	23.6715	26.4419	156.776	51.415
Koike_CLKBMAL1_P0177	AR_G020	3_AR020	intron	6.85272	111.851	5.04378	44.1882	7.24254	24.7341	Eif4g1	23.426	30.308	23.203	23.374	27.499	23.335	28.103	23.341	23.71	32.843	18.954	18.711	56.541	56.328	58.016	56.145	55.846	57.936	60.293	58.137	62.468	60.111	50.082	56.472	7.45781	27.5457	35.0563	32.6794	16.2258	12.2718	5.72694	48.0475	87.8333	75.9865	90.533	7.89049	34.3745	17.4196	53.0216
Koike_CLKBMAL1_P0181	AR_G021	3_AR021	intron	6.95515	104.333	4.35357	36.69	1.20149	45.4397	0610008F07Rik	29.432	50.76	57.011	54.275	30.919	77.139	42.54	47.565	43.886	26.391	40.364	44.997	5.31	4.573	2.659	3.914	4.061	3.232	3.552	4.157	2.373	3.648	4.251	2.73	1.15601	33.0549	38.7867	27.929	16.9166	10.8957	7.93094	58.7854	64.9203	99.3469	73.7676	20.5153	34.3745	60.9686	45.4472
Koike_CLKBMAL1_P0192	AR_G022	3_AR022	TSS	6.43826	62.275	5.16913	46.3486	9.62858	6.53173	Slc20a1	7.212	4.502	10.53	5.799	10.042	5.774	4.581	3.028	13.131	7.36	2.487	3.935	2.286	4.532	4.196	4.312	3.062	3.154	2.458	5.868	3.956	4.484	3.1	3.483	9.89132	30.8512	42.8383	37.771	15.3295	9.22639	3.7659	15.0148	77.534	42.9866	38.2047	6.31239	7.93257	26.1294	37.8726
Koike_CLKBMAL1_P0197	AR_G023	3_AR023	intron	7.01182	98.1979	5.48031	53.9985	5.7778	7.88942	Decr1	7.449	9.01	13.348	4.847	4.329	7.456	7.459	6.642	13.548	6.141	6.261	8.184	29.612	58.399	52.56	49.309	54.3	46.933	34.535	58.624	64.151	46.732	38.044	36.699	10.3876	30.8512	41.6031	38.1396	23.1717	14.0088	8.33009	60.0593	57.2826	54.4497	70.4146	25.2496	13.2209	52.2587	45.4472
Koike_CLKBMAL1_P0208	AR_G024	3_AR024	intron	9.27346	87.1564	7.71346	40.9901	3.49049	13.526	AK003943	12.498	20.232	20.888	6.739	10.372	15.192	22.668	11.514	16.095	12.272	3.281	10.561	0.695	1.538	1.181	0.959	1.334	0.712	0.688	1.818	2.029	0.605	0.455	0.756	8.35685	21.6693	26.0884	44.8693	29.408	11.9108	4.00886	33.0326	30.5507	100.302	81.5915	23.7193	15.8651	17.4196	7.57453
Koike_CLKBMAL1_P0216	AR_G025	3_AR025	intron	7.11137	98.0558	5.58746	45.718	12.7768	12.0666	Epas1	6.482	11.476	10.622	11.969	16.498	12.276	11.413	14.231	9.241	20.688	9.054	10.85	13.013	19.237	13.976	11.693	14.795	11.306	16.526	19.949	17.446	16.53	16.331	12.206	7.61712	23.4723	41.5784	32.4337	20.9497	6.69985	2.86347	30.0297	61.1015	85.9733	46.943	18.9372	21.1535	43.549	15.1491
Koike_CLKBMAL1_P0230	AR_G026	3_AR026	intron	7.44205	136.947	5.64647	55.6223	6.28723	5.10562	Ndufb9	5.385	6.174	5.354	6.983	3.644	5.596	4.843	4.654	5.107	4.572	4.511	4.442	145.666	159.305	163.472	155.429	157.115	147.431	130.403	166.596	164.732	144.316	146.692	143.91	10.0876	59.8995	84.1943	76.4703	34.3187	19.4002	6.14344	78.0772	140.256	175.768	166.536	35.7702	45.9929	79.1799	60.5962
Koike_CLKBMAL1_P0241	AR_G027	3_AR027	exon	3.80337	38.5333	3.48104	46.3524	15.3733	33.2381	Hao1	38.425	23.106	19.297	23.274	25.336	19.225	25.171	25.317	40.572	38.981	92.776	27.377	124.356	96.789	109.076	102.708	111.266	105.32	118.933	92.076	90.871	99.87	105.825	106.918	22.868	40.7677	36.5633	22.5234	12.3234	8.1887	2.29078	30.0297	30.5507	20.0604	10.0592	6.59932	2.64419	17.4196	22.7236
Koike_CLKBMAL1_P0245	AR_G028	3_AR028	TSS	6.72008	75.3562	2.26423	42.7352	22.7702	6.84143	Eif4a1	9.319	5.735	6.905	4.247	5.251	7.24	9.259	4.925	6.655	8.872	6.755	6.936	96.774	75.584	92.183	89.194	75.108	80.595	103.229	83.935	93.366	97.663	80.611	86.561	6.87149	51.5189	33.2528	21.677	9.76534	10.422	9.1631	39.0386	49.6449	59.3129	51.4138	17.3591	31.9707	104.518	37.8726
Koike_CLKBMAL1_P0246	AR_G029	3_AR029	intron	6.77391	120.711	6.39681	43.2921	22.4498	8.85519	Myo10	9.918	8.817	8.804	8.752	10.483	9.564	10.662	8.779	7.299	7.683	8.456	7.045	2.639	4.244	3.165	4.355	3.783	3.577	3.443	4.372	3.726	3.815	3.664	3.929	12.5428	24.2403	38.6632	46.3845	24.0306	15.633	5.15424	65.1553	71.8636	123.228	73.7676	7.89049	26.4419	26.1294	37.8726
Koike_CLKBMAL1_P0259	AR_G030	3_AR030	TSS	5.46374	36.8431	2.89872	37.8675	8.64871	8.52182	Ehmt2	9.021	9.997	9.226	9.463	9.763	7.255	9.821	8.443	5.095	10.792	7.782	5.604	9.331	10.139	8.969	9.125	9.352	8.548	9.011	10.018	8.881	8.454	9.13	9.293	4.82802	36.4272	32.6105	21.9774	12.8275	3.72214	9.31929	18.0178	26.7319	25.792	30.1777	2.05631	15.8651	43.549	0
Koike_CLKBMAL1_P0263	AR_G031	3_AR031	intergenic-10kbless	7.70082	89.2557	6.38613	46.1863	8.7386	18.8949	Plekha6	15.093	19.763	24.821	24.355	17.082	20.432	20.321	20.409	13.46	22.196	15.046	13.76	6.861	6.783	5.29	7.158	6.354	4.606	6.245	7.182	5.233	7.297	6.438	6.592	10.972	24.2403	39.9478	48.2137	19.7174	7.44427	1.71808	15.0148	68.7391	108.899	53.6492	4.73429	5.28838	43.549	22.7236
Koike_CLKBMAL1_P0276	AR_G032	3_AR032	TSS	6.665	60.006	3.37682	46.7034	5.44626	4.27508	Hif1a	3.245	4.255	4.224	3.355	2.522	5.187	4.153	4.053	8.549	3.794	2.646	5.316	8.363	9.775	8.301	7.325	7.278	7.626	8.927	9.315	9.191	7.799	8.632	6.835	6.49243	46.2768	33.4257	21.3085	17.9062	5.21099	2.29078	36.0356	34.3696	49.8471	40.2369	11.0467	5.28838	43.549	0
Koike_CLKBMAL1_P0278	AR_G033	3_AR033	TSS	4.69217	63.9029	3.34314	33.2042	11.8526	6.37141	Tmem55b	4.402	6.382	6.589	7.168	5.661	7.047	6.043	6.865	5.976	7.376	6.931	6.016	9.195	9.352	8.917	9.828	8.182	9.237	9.165	9.298	9.193	9.946	9.88	10.066	17.0016	45.4087	33.5246	23.1376	13.425	9.49709	1.14539	48.0475	68.7391	43.1603	46.943	15.781	39.6628	124.576	106.043
Koike_CLKBMAL1_P0281	AR_G034	3_AR034	intron	4.8186	81.9611	3.69369	44.2532	3.07169	19.3046	Ranbp10	18.532	21.673	17.628	19.515	14.659	20.2	21.891	26.055	15.544	22.752	14.103	19.104	13.069	13.868	12.082	15.045	15.167	15.846	13.739	14.05	12.25	12.248	16.469	13.066	19.9713	38.564	41.5784	26.0589	11.9499	5.95542	3.43616	59.4224	72.558	45.8524	46.943	27.4015	18.5093	95.8077	53.0217
Koike_CLKBMAL1_P0284	AR_G035	3_AR035	intron	6.5865	45.2272	3.29569	35.7486	23.4669	19.1182	Qdpr	18.487	24.154	14.224	13.095	22.805	34.339	24.261	24.456	14.608	12.478	7.786	18.725	183.348	285.541	231.215	177.393	206.254	200.074	151.776	267.619	246.92	167.884	211.147	168.234	7.94948	39.6659	43.1595	22.6462	7.63676	4.15075	2.09988	21.9308	46.1733	39.3393	40.2369	4.73429	5.28838	69.6784	62.2029
Koike_CLKBMAL1_P0285	AR_G036	3_AR036	TSS	4.15004	32.1698	2.00103	35.5548	18.2219	6.63542	St13	7.153	5.699	5.639	5.572	5.326	7.898	8.187	4.632	7.225	7.529	9.4	5.366	34.916	40.564	44.622	44.032	43.816	45.014	34.707	44.579	41.965	41.761	42.316	39.368	13.7739	49.1817	31.7952	14.7016	13.9105	10.422	9.1631	21.0208	22.913	34.3893	13.4123	10.2337	39.6628	69.6784	30.2981
Koike_CLKBMAL1_P0288	AR_G037	3_AR037	intron	3.57065	48.3265	2.42147	34.8418	3.09878	17.0203	Adcy9	16.735	24.585	16.979	17.466	16.037	15.868	19.462	24.602	12.013	12.865	14.366	13.267	3.513	4.25	3.491	3.059	3.072	3.525	4.423	4.348	3.382	3.074	3.544	3.656	3.74576	51.4855	35.8715	23.0284	7.39402	8.93313	7.44502	50.6865	64.9203	28.6578	27.6375	10.951	13.2209	87.0979	45.4472
Koike_CLKBMAL1_P0300	AR_G038	3_AR038	intergenic-10kbless	4.62665	84.8328	2.67708	39.9834	19.1369	10.7569	Mef2d	11.869	9.631	7.861	14.84	12.409	13.667	11.415	12.022	5.497	10.598	9.513	9.761	3.801	3.913	3.305	3.721	4.082	3.294	3.92	3.189	3.35	3.592	4.299	4.326	20.4906	40.0665	43.283	19.6158	9.14917	14.8885	5.779	63.0623	76.3768	56.3603	50.2961	7.89049	18.5093	60.9685	60.5962
Koike_CLKBMAL1_P0303	AR_G039	3_AR039	intron	5.07295	50.3224	3.58997	29.3841	0.125708	158.073	Mlxipl	128.029	214.712	96.614	135.935	158.208	193.963	165.957	195.686	128.527	198.728	134.984	145.529	27.142	37.779	32.683	40.497	32.577	34.062	26.4	37.838	27.736	38.314	44.309	28.347	14.431	38.9647	34.4386	19.3701	11.7072	7.94056	2.29078	45.4995	34.3696	45.8524	40.2369	7.89049	29.0861	78.3882	22.7236
Koike_CLKBMAL1_P0311	AR_G040	3_AR040	TSS	6.44469	72.7943	4.22317	38.6765	12.2663	4.31536	Hdgf	4.045	4.043	4.054	5.345	4.589	3.82	4.304	3.526	3.13	8.106	4.032	2.789	46.059	56.514	56.055	56.047	53.304	48.346	42.782	55.82	58.942	54.268	49.95	45.543	11.0957	36.928	44.0241	27.7515	11.091	8.68498	2.29078	36.0356	49.6449	54.4497	40.2369	11.0467	29.0861	113.227	113.618
Koike_CLKBMAL1_P0317	AR_G041	3_AR041	intron	7.11489	55.6796	4.33685	46.1838	7.89565	40.2092	AK085337	36.572	46.806	44.986	46.285	50.559	40.455	41.587	45.733	29.505	53.688	19.244	27.09	17.662	21.98	18.999	5.575	21.127	18.002	15.966	21.506	17.684	5.685	19.45	20.895	2.0922	35.3253	46.4699	35.9282	9.1305	5.95542	3.05437	24.0237	38.1884	25.792	43.59	7.89049	18.5093	8.70978	31.4458
Koike_CLKBMAL1_P0318	AR_G042	3_AR042	5' UTR	3.88465	51.5594	2.80723	41.2061	3.81116	30.7302	Shmt1	19.265	37.459	28.103	25.461	30.408	40.83	29.564	33.798	29.775	42.63	14.782	36.688	35.101	51.55	49.94	55.704	52.08	59.441	36.339	54.559	54.042	48.672	47.737	43.971	13.2548	49.4488	35.2786	21.2402	11.7072	7.44427	4.40801	22.7498	57.2826	25.792	30.1777	2.24759	29.0861	69.6784	37.8726
Koike_CLKBMAL1_P0319	AR_G043	3_AR043	intron	4.02095	80.4358	4.92873	36.2302	21.2844	5.12276	Gale	8.615	3.537	2.175	3.525	8.567	8.038	8.633	2.66	4.596	3.828	1.995	5.305	6.324	4.91	1.962	5.631	5.273	7.174	4.615	4.033	6.528	7.896	7.431	9.691	19.8979	25.3421	34.241	33.1025	9.8587	5.95542	2.29078	45.0445	68.7391	22.9262	43.59	17.3591	22.4355	104.517	68.1707
Koike_CLKBMAL1_P0325	AR_G044	3_AR044	intron	5.92735	67.6819	5.0291	31.7053	0.253067	6.88111	Bcr	7.917	8.912	5.377	8.324	8.275	6.217	7.935	7.01	3.96	7.985	5.767	4.895	3.85	4.256	3.699	4.898	4.603	4.694	4.258	4.525	3.978	5.08	4.766	5.41	18.6665	30.8512	29.1024	28.3795	14.788	4.46656	3.93944	36.0356	53.4638	71.6444	40.2369	17.3591	29.0861	34.8392	37.8726
Koike_CLKBMAL1_P0326	AR_G045	3_AR045	intron	8.75528	63.0802	6.63452	36.6729	4.81748	6.60547	Dis3l2	6.496	7.316	8.186	8.219	5.589	6.253	7.823	7.055	7.401	4.528	4.357	6.041	2.612	2.771	2.708	1.819	1.581	1.938	2.993	2.94	2.84	2.2	2.596	2.956	4.87229	23.1384	31.7952	39.0132	27.7276	13.1064	4.00886	30.5757	42.123	54.4497	70.4146	11.0467	23.7977	52.2588	60.5962
Koike_CLKBMAL1_P0332	AR_G046	3_AR046	TSS	3.19075	31.4159	4.30582	15.1777	14.713	11.3943	Pnpo	9.158	9.322	10.208	16.53	15.62	12.424	11.501	13.836	8.635	11.351	6.629	11.517	49.194	42.866	45.418	49.734	47.717	53.287	52.828	48.675	49.089	49.019	47.131	54.347	21.9923	28.9481	32.6105	24.3798	9.57862	4.46656	2.29078	60.9693	58.4398	25.792	30.9905	11.0467	23.3971	60.9686	29.6095
Koike_CLKBMAL1_P0336	AR_G047	3_AR047	TSS	6.00283	56.6721	5.3506	40.1099	7.50689	5.52259	Gmfb	4.198	5.155	7.409	4.878	4.823	5.484	5.46	5.428	7.852	5.454	4.332	5.798	8.008	10.957	11.214	10.37	9.675	10.481	9.925	11.593	10.903	8.582	9.256	9.101	8.34096	24.2403	29.3494	24.6119	17.9809	9.06848	2.86347	27.0267	34.3696	57.3155	20.1184	11.0467	18.5093	17.4196	15.1491
Koike_CLKBMAL1_P0341	AR_G048	3_AR048	intergenic-10kbless	5.85733	81.1947	3.855	34.96	19.1838	101.668	Aldh1l1	100.994	93.961	73.418	138.578	84.107	167.46	119.496	88.133	65.088	100.817	105.564	82.4	188.642	234.992	232.719	206.894	206.375	198.138	173.142	211.582	231.736	234.395	251.794	195.933	12.473	29.115	40.1949	20.7898	11.4085	12.926	4.58155	42.0415	68.7391	47.8498	46.943	25.5365	26.4419	34.8392	37.8726
Koike_CLKBMAL1_P0345	AR_G049	3_AR049	TSS	4.63065	77.2827	4.90997	40.9978	15.8292	6.44753	Prhoxnb	11.303	3.001	3.817	10.333	7.385	4.97	3.589	5.498	4.645	5.424	13.728	3.678	38.204	12.506	39.139	31.534	28.834	25.081	37.669	8.319	14.136	44.346	37.446	34.53	18.4287	34.1567	24.5073	31.5327	18.4851	5.21099	5.15424	29.4837	53.4638	42.9866	30.9905	20.9935	34.3745	52.2587	45.4472
Koike_CLKBMAL1_P0357	AR_G050	3_AR050	intron	7.36648	44.1421	3.65735	36.0657	20.6761	6.98426	Arid1b	7.555	7.279	6.862	8.03	6.869	6.889	7.653	6.455	6.033	6.793	7.13	6.262	1.942	2.323	1.817	1.764	1.99	2.054	2.191	1.799	1.742	1.874	1.891	2.366	0.188502	40.7677	34.4139	24.7757	14.788	5.21099	3.62706	24.0237	45.8261	37.2551	46.943	15.781	13.2209	60.9685	90.8943
Koike_CLKBMAL1_P0358	AR_G051	3_AR051	intron	5.99436	43.3748	3.80351	43.2648	15.405	6.2482	Rps9	5.508	4.158	9.353	5.095	7.882	7.182	6.641	4.664	6.005	6.261	5.468	6.762	67.259	58.594	64.861	65.411	57.575	55.596	57.984	61.627	52.644	68.782	65.967	65.795	16.3838	36.3604	44.3947	28.8299	6.16169	5.21099	2.86347	21.0208	53.4638	60.1813	16.7654	5.73854	7.93257	34.8392	30.2981
Koike_CLKBMAL1_P0361	AR_G052	3_AR052	intron	5.38261	104.13	5.42615	36.2121	6.49856	18.6662	Gprin3	13.248	18.069	24.269	14.264	6.903	13.273	19.339	21.225	38.195	15.609	18.887	20.714	3.065	5.748	4.489	3.757	4.176	4.834	3.636	5.847	4.604	3.877	3.75	2.524	7.97225	20.9348	39.9478	26.3865	16.0391	12.6553	4.06092	48.0475	103.109	85.9733	36.8838	15.781	26.4419	17.4196	41.0861
Koike_CLKBMAL1_P0364	AR_G053	3_AR053	intron	3.61965	42.187	4.91244	29.5035	3.72778	4.55884	Tmem80	3.838	5.09	4.774	5.036	3.499	5.059	6.052	6.506	3.503	4.419	3.77	3.16	1.759	1.755	2.034	1.641	2.372	1.802	1.813	1.952	1.997	1.705	2.324	1.904	17.5432	25.3421	28.2624	24.2706	14.1719	7.44427	2.29078	45.0445	53.4638	37.2551	30.1777	12.6248	24.3586	60.9685	45.4472
Koike_CLKBMAL1_P0375	AR_G054	3_AR054	intron	2.11758	87.6272	4.49	47.5268	22.4498	8.85519	Myo10	9.918	8.817	8.804	8.752	10.483	9.564	10.662	8.779	7.299	7.683	8.456	7.045	2.639	4.244	3.165	4.355	3.783	3.577	3.443	4.372	3.726	3.815	3.664	3.929	12.5428	33.3888	33.0552	34.7133	14.1719	17.6858	5.72694	63.0623	57.2826	52.2787	46.6382	14.2029	52.8838	113.227	15.1491
Koike_CLKBMAL1_P0377	AR_G055	3_AR055	intron	7.77578	73.1656	5.29196	40.3524	15.7436	9.40092	B4galt1	11.081	8.806	7.046	6.633	12.681	6.512	8.601	7.529	9.8	11.666	14.19	8.267	15.657	8.037	15.19	11.572	14.245	11.399	15.649	13.274	14.121	9.393	10.993	13.986	1.99948	28.6476	26.0884	21.6224	19.7174	11.9108	2.86347	33.0326	30.5507	51.584	50.2961	17.3591	18.5093	17.4196	37.8726
Koike_CLKBMAL1_P0384	AR_G056	3_AR056	intergenic-10kbless	4.61717	47.8359	4.49093	26.5733	6.19639	7.67373	Limd1	7.156	8.582	9.302	7.924	6.586	8.123	7.804	7.942	7.163	8.34	6.304	6.86	8.528	8.146	9.911	8.727	8.252	8.7	8.259	8.315	8.24	7.419	7.846	8.194	7.47514	34.0566	28.9789	27.929	12.8835	9.11359	3.3841	18.0178	45.8261	41.9445	23.4715	16.5939	29.0861	34.8392	30.2981
Koike_CLKBMAL1_P0385	AR_G057	3_AR057	intron	6.1473	127.368	3.49529	36.3495	17.9739	17.9898	St3gal4	23.155	11.876	11.065	14.728	26.486	18.586	21.96	14.619	12.31	22.578	24.875	13.638	22.359	17.639	26.54	24.786	23.029	18.912	25.766	19.385	28.374	20.146	24.303	25.276	13.8114	37.4622	32.6105	22.4551	15.4789	13.3997	3.43616	66.0653	84.0145	94.5706	67.0615	29.0274	39.6628	69.6784	50.2673
Koike_CLKBMAL1_P0389	AR_G058	3_AR058	intergenic-10kbless	6.99239	32.4153	3.76644	20.8548	6.45219	23.6714	Slc25a22	24.068	29.141	27.665	42.881	16.157	23.056	27.961	28.39	12.592	26.523	10.916	14.704	31.785	40.18	30.034	37.252	32.062	28.34	27.041	38.489	33.052	33.521	25.015	30.328	8.5656	25.3421	34.241	15.9165	9.8587	4.39889	3.43616	24.0237	30.5507	42.9866	30.1777	4.73429	18.5093	34.8392	60.5962
Koike_CLKBMAL1_P0390	AR_G059	3_AR059	intron	6.46794	57.7625	5.17039	24.4867	1.17786	4.67525	1700001C19Rik	4.705	6.216	3.583	4.717	6.159	5.592	4.302	8.237	2.557	3.514	1.599	4.922	3.695	8.029	3.193	2.674	2.976	2.66	4.405	7.088	4.159	2.228	4.409	4.746	4.87726	26.5107	28.0401	28.161	19.7361	8.57219	3.52293	39.0386	57.2826	70.0813	56.4942	10.0424	21.1535	26.1294	11.7061
Koike_CLKBMAL1_P0398	AR_G060	3_AR060	intron	5.07984	66.0788	2.78966	40.2893	2.4383	11.2726	Amotl2	10.741	15.779	9.386	10.246	8.35	11.783	15.074	12.209	8.755	13.933	9.632	9.381	4.521	4.623	6.318	5.117	6.939	6.039	4.978	5.834	5.815	5.82	6.131	5.561	16.0593	50.6842	38.2432	20.4348	8.60769	5.21099	4.58155	42.0415	80.1957	41.163	39.0176	12.6248	23.7977	34.8391	22.7236
Koike_CLKBMAL1_P0400	AR_G061	3_AR061	TSS	5.77204	32.6152	2.79859	34.6996	8.35744	13.7999	Txnip	7.343	6.713	25.439	6.711	4.456	5.351	7.643	3.86	64.763	17.898	5.15	10.271	14.035	27.555	21.963	19.952	20.048	15.063	12.825	34.762	23.341	17.92	22.947	13.989	9.13991	35.8262	46.8405	12.8588	5.69489	5.21099	3.67912	21.0208	22.913	35.4314	16.7654	4.73429	5.28838	17.4196	15.1491
Koike_CLKBMAL1_P0404	AR_G062	3_AR062	TSS	4.83726	109.821	3.34809	35.9857	6.08981	7.32982	Lonp1	6.729	8.2	7.68	8.291	6.677	6.812	7.812	9.596	4.845	9.199	5.909	6.209	19.448	24.733	23.354	23.578	23.371	24.426	20.132	24.903	25.347	23.828	24.494	22.463	12.5615	30.8512	30.98	18.4692	5.54552	3.58679	2.79405	48.0475	106.928	37.2551	57.0023	17.3591	15.8651	60.9685	22.7236
Koike_CLKBMAL1_P0405	AR_G063	3_AR063	intron	8.01659	41.0038	3.84895	30.5501	3.13418	6.37327	Dusp12	5.096	7.62	6.968	5.528	7.098	7.526	7.243	7.482	6.054	6.13	3.762	5.972	4.998	6.411	2.28	3.678	5.229	1.983	3.886	4.086	3.491	3.705	4.728	5.21	0.859618	24.2736	33.154	18.0187	9.93338	8.1887	4.23446	12.0119	22.913	36.5604	33.5307	1.5781	10.5768	52.2587	15.1491
Koike_CLKBMAL1_P0406	AR_G064	3_AR064	TSS	4.54407	103.856	4.02009	24.9474	18.0212	7.91516	Napa	9.386	6.879	7.113	8.733	8.932	8.597	8.346	7.709	4.879	9.636	7.852	6.92	12.744	14.903	12.696	13.447	12.124	13.529	14.139	15.958	14.233	14.59	13.993	13.557	6.79498	29.3821	31.5976	18.7695	12.3234	8.57219	1.14539	72.0712	105.539	61.8313	63.7084	15.781	42.307	171.293	22.7236
Koike_CLKBMAL1_P0412	AR_G065	3_AR065	5' UTR	4.03649	82.1078	3.16398	44.1434	4.72326	5.88542	Pbrm1	4.706	6.593	7.03	4.082	4.315	6.332	6.027	6.521	9.358	5.036	3.823	6.801	5.734	5.428	4.363	4.674	4.432	5.507	5.186	5.017	5.033	3.94	4.76	4.823	2.30973	45.175	50.3239	20.7215	14.0412	11.1664	3.69648	57.0564	68.7391	57.3155	33.5307	9.46859	29.0861	78.3881	133.587
Koike_CLKBMAL1_P0416	AR_G066	3_AR066	TSS	5.03817	48.8174	3.83993	30.2682	6.0399	9.06397	Gprc5c	11.885	9.346	9.693	11.419	7.319	8.533	8.651	10.289	6.203	9.12	10.658	5.65	19.891	12.978	15.32	13.057	13.625	12.49	17.648	14.686	11.87	12.888	11.712	13.914	2.82001	30.7177	40.1208	21.7589	9.37323	3.72214	2.86347	45.0445	38.1884	51.584	23.4715	9.46859	15.5446	95.8076	39.7089
Koike_CLKBMAL1_P0417	AR_G067	3_AR067	TSS	5.1429	97.8512	2.43979	37.8713	6.75872	5.71988	Tbc1d15	4.17	5.055	5.852	4.659	3.456	4.798	6.595	6.88	9.288	5.858	6.514	5.512	14.178	12.011	11.467	10.737	9.624	9.551	13.122	11.181	11.516	9.582	10.491	10.4	4.4712	37.4622	34.3645	12.1626	5.54552	4.46656	5.15424	53.6894	72.558	60.1813	46.943	4.73429	29.0861	41.9654	30.2981
Koike_CLKBMAL1_P0419	AR_G068	3_AR068	TSS	5.58016	87.1286	4.84631	37.7951	13.5074	30.4014	Pipox	14.819	29.067	26.73	38.798	25.568	38.848	28.573	34.045	21.026	46.805	31.665	28.873	94.178	107.839	118.055	120.943	121.437	105.163	85.314	109.164	107.154	125.158	119.928	106.761	14.4271	24.2403	31.4246	27.929	14.1719	12.362	4.00886	54.0534	72.558	69.8207	46.943	32.7575	21.1535	130.647	45.4472
Koike_CLKBMAL1_P0420	AR_G069	3_AR069	intron	4.63595	90.7358	5.36707	38.4218	3.97117	7.34815	Xpo6	6.747	8.445	9.087	5.988	6.276	7.36	8.276	8.811	6.34	7.969	5.824	7.055	4.114	4.914	3.497	4.434	4.029	4.088	3.988	5.31	4.419	3.762	4.668	3.788	6.29492	20.9014	29.3494	25.663	16.1137	12.6553	7.41031	47.9565	86.9076	40.1209	50.2961	12.6248	21.1535	8.70978	45.4471
Koike_CLKBMAL1_P0425	AR_G070	3_AR070	intron	6.68637	46.1849	3.43372	28.347	5.20046	7.78128	Angptl3	5.091	9.34	7.404	6.67	5.273	9.573	8.846	7.605	14.801	7.241	2.963	8.57	74.211	149.964	152.518	129.531	148.656	118.062	74.416	156.735	155.827	110.03	137.146	98.185	11.4855	35.8929	31.7952	25.2262	8.62636	5.95542	6.29963	18.0178	49.6449	34.3893	36.8838	14.3463	15.8651	17.4196	22.7236
Koike_CLKBMAL1_P0426	AR_G071	3_AR071	intron	6.33906	36.2492	5.25489	20.8113	6.86896	5.98232	Arhgef3	4.85	6.57	8.257	6.872	4.43	6.415	6.543	6.093	6.167	6.988	3.478	5.125	6.014	7.365	5.63	6.488	5.509	6.614	5.39	7.592	7.07	6.914	5.619	6.539	7.81332	27.5457	28.1389	24.5437	15.759	11.1664	3.43616	54.0534	30.5507	51.584	50.2961	11.0467	15.8651	34.8392	22.7236
Koike_CLKBMAL1_P0439	AR_G072	3_AR072	intergenic-10kbless	6.27575	27.1096	4.16009	9.84736	7.77913	33.9296	Zfp36	24.185	28.94	45.967	47.206	20.62	35.106	38.69	27.787	50.355	32.241	16.866	39.194	19.139	41.334	30.791	17.754	21.282	18.28	16.874	40.192	34.267	28.191	37.501	23.966	8.94518	24.7411	26.8048	20.039	6.04965	4.30865	2.74199	62.6983	68.7391	76.4207	60.3553	11.0467	15.9453	52.2587	53.0217
Koike_CLKBMAL1_P0440	AR_G073	3_AR073	intron	8.62269	58.9549	6.1554	35.4396	21.3701	19.1554	Wwc1	19.207	26.577	13.908	11.616	31.768	21.659	23.847	19.253	9.103	16.312	17.475	19.14	9.701	14.336	12.289	18.346	15.598	15.866	11.994	15.356	13.792	17.616	13.618	15.878	15.4573	19.8329	31.7952	26.9734	20.9497	9.67755	4.00886	9.0089	38.1884	52.8866	43.59	9.46859	26.4419	26.1294	30.2981
Koike_CLKBMAL1_P0441	AR_G074	3_AR074	TTS	5.73903	43.748	2.8503	23.4104	0.872652	9.57439	Fgfr3	13.645	10.713	8.972	7.188	6.861	9.652	13.322	8.309	8.955	9.627	10.535	7.113	6.184	6.134	6.58	6.247	5.388	4.907	6.433	5.694	4.744	3.927	4.865	4.419	5.61348	42.9714	47.2852	19.8206	4.92935	8.84289	5.27572	63.0623	53.4638	68.7786	36.8838	11.0467	13.7017	60.9686	29.38
Koike_CLKBMAL1_P0448	AR_G075	3_AR075	intron	4.9277	52.3065	3.96002	32.0157	5.73315	3.33312	Adora1	2.185	4.326	10.459	2.541	1.383	3.459	4.882	3.365	2.696	2.046	1.304	1.35	1.525	7.226	5.033	6.664	3.783	4.048	2.361	8.577	7.088	4.223	2.726	4.774	9.34387	22.7378	49.4345	20.0117	4.48123	7.44427	0.572694	24.0237	80.1957	40.1209	26.8246	11.0467	2.64419	156.776	121.192
Koike_CLKBMAL1_P0453	AR_G076	3_AR076	intron	4.43381	64.7329	3.27025	31.1081	10.6077	8.25042	Sorbs3	3.581	7.766	6.974	19.841	4.757	6.425	5.319	14.889	2.628	13.494	7.171	6.158	3.458	3.401	3.909	4.278	3.152	2.232	3.058	3.072	2.772	4.132	4.083	2.372	12.7355	33.9898	34.241	18.9606	9.11183	9.20383	4.00886	48.0475	42.0073	73.6418	30.8889	15.5419	31.7303	45.9244	100.764
Koike_CLKBMAL1_P0457	AR_G077	3_AR077	intron	6.72334	58.721	4.04475	30.5883	5.80725	9.25987	Bcar1	10.009	11.471	11.059	11.632	9.702	7.656	10.564	9.609	7.049	8.745	7.111	6.511	8.341	10.33	7.469	6.996	7.035	7.906	8.959	9.551	7.066	8.145	9.415	7.627	3.7149	29.7494	32.6105	20.7761	12.3234	8.32405	4.02621	54.0534	30.5507	40.1209	53.6492	16.9765	13.2209	26.1294	22.7236
Koike_CLKBMAL1_P0463	AR_G078	3_AR078	TSS	6.20486	83.9775	3.90577	28.2457	9.34407	8.31503	Cobll1	4.7	9.732	8.998	10.99	5.132	7.592	7.658	9.166	8.402	12.297	7.389	7.724	3.577	6.087	4.328	4.11	4.579	4.646	3.566	6.029	5.442	4.071	3.84	4.19	7.67364	31.9531	26.9036	25.1033	12.3234	6.69985	2.29078	60.0593	61.1015	57.3155	63.7084	17.3591	27.0829	104.517	22.7236
Koike_CLKBMAL1_P0465	AR_G079	3_AR079	intergenic-10kbless	7.25204	80.3121	4.30891	33.0831	0.321466	15.3743	Efna1	15.923	12.426	14.274	17.306	19.213	18.363	20.688	22.14	13.471	7.752	7.538	15.398	17.442	23.226	7.786	17.576	18.184	17.895	18.597	14.383	8.287	18.363	25.1	21.897	21.3143	30.8512	44.6418	25.2262	13.7611	3.72214	0	48.0475	57.2826	76.7681	59.0344	9.46859	23.7977	78.3881	53.0217
Koike_CLKBMAL1_P0468	AR_G080	3_AR080	intron	8.10259	74.7782	7.00996	34.3828	9.28826	13.4083	Trib1	15.303	12.912	15.348	15.466	14.179	15.894	11.553	6.811	21.81	10.143	9.496	11.984	5.626	4.99	7.021	6.562	5.734	4.826	7.058	10.6	7.719	9.863	6.336	6.106	10.0983	18.7311	29.3494	40.9652	22.6862	10.7152	4.58155	35.8536	42.0073	76.9417	70.4146	20.3718	29.0861	68.0947	37.8726
Koike_CLKBMAL1_P0469	AR_G081	3_AR081	TTS	5.25244	102.573	3.50089	30.6103	14.6177	3.59553	Leng9	4.03	2.956	3.636	6.703	4.527	4.038	2.541	2.244	1.356	4.361	4.175	2.579	1.552	1.337	1.506	1.658	2.322	1.306	1.71	1.276	1.058	1.767	1.531	1.183	17.392	35.2585	26.6319	26.5366	8.62636	8.93313	3.14114	57.0564	68.6234	79.0259	57.4087	23.6715	42.307	174.196	98.4688
Koike_CLKBMAL1_P0471	AR_G082	3_AR082	TSS	6.40501	36.1671	3.69154	24.9093	15.5443	4.13564	Derl3	2.452	1.184	1.129	5.483	16.81	1.644	1.535	3.413	1.498	2.382	10.707	1.392	10.042	0.264	0.909	2.2	0.68	0.357	5.274	0.482	0.285	2.271	1.606	3.56	0.807278	31.3187	30.1647	18.9196	8.01019	2.23328	2.29078	27.0267	64.9203	57.3155	24.386	4.73429	5.28838	8.70978	37.8726
Koike_CLKBMAL1_P0483	AR_G083	3_AR083	intergenic-10kbless	8.6741	43.1012	5.59392	26.9937	23.947	12.3372	Pten	11.176	11.446	11.356	9.63	10.115	15.212	14.118	12.018	16.059	11.221	8.814	16.883	15.237	17.551	16.187	17.122	16.434	17.579	14.787	17.494	15.553	15.702	16.253	17.239	19.5005	32.0866	22.0121	30.9867	18.8025	7.39916	2.93289	27.4817	38.3041	60.4418	64.1148	7.89049	5.28838	59.121	22.7236
Koike_CLKBMAL1_P0485	AR_G084	3_AR084	intron	6.55323	98.0755	3.82747	36.7536	13.6377	7.88983	Irs2	3.538	3.624	6.511	20.476	7.482	4.528	3.677	13.322	2.733	5.056	14.023	9.71	1.206	1.435	0.442	0.615	0.983	1.008	0.775	1.085	0.612	1.292	2.745	1.788	20.5068	30.8512	25.2731	18.9196	14.788	9.49709	4.00886	54.0534	49.6449	57.3155	60.3553	20.5153	23.7977	104.517	60.5962
Koike_CLKBMAL1_P0489	AR_G085	3_AR085	intron	7.21605	32.4279	6.42196	17.5475	9.11609	7.77009	Tmem106a	7.151	8.004	10.757	9.316	8.338	7.556	6.817	8.387	5.868	8.037	6.396	6.615	2.226	3.256	2.733	2.569	2.958	2.661	2.397	3.513	2.96	3.109	2.5	2.848	9.38586	17.6293	33.4257	31.2461	16.0204	11.1664	6.73349	30.0297	53.4638	44.984	39.7288	4.73429	34.3745	21.3786	15.1491
Koike_CLKBMAL1_P0495	AR_G086	3_AR086	intergenic-10kbless	6.07235	51.8934	3.653	29.3308	9.5297	21.8216	Mosc2	18.514	24.367	29.091	30.253	17.06	21.223	18.529	20.992	19.148	22.117	22.515	18.05	29.749	33.732	38.532	34.073	33.049	29.884	26.725	32.588	35.367	36.239	32.567	28.804	11.7891	28.6476	33.6481	22.0456	5.54552	7.30892	3.43616	24.0237	76.724	51.0629	40.2369	19.8458	13.2209	55.162	22.7236
Koike_CLKBMAL1_P0503	AR_G087	3_AR087	intron	5.253	42.7286	3.00426	36.1637	20.0445	10.923	Pcsk9	7.457	7.153	9.368	4.794	15.112	22.531	14.81	8.724	11.176	13.45	4.548	11.953	6.011	14.055	8.226	8.565	7.361	10.664	9.4	14.669	8.893	12.348	11.884	12.998	5.02544	45.175	36.6868	21.6634	9.24253	5.95542	2.29078	12.0119	57.2826	25.792	16.7654	11.2858	14.2626	55.162	22.7236
Koike_CLKBMAL1_P0504	AR_G088	3_AR088	intron	5.07757	95.1831	4.75722	39.1018	7.57017	10.1784	Pcsk6	11.653	12.292	14.472	10.455	7.092	8.837	9.64	5.457	13.382	11.276	8.738	8.846	16.769	27.481	26.975	27.037	28.48	26.504	19.803	31.629	37.259	25.512	25.37	20.615	11.2335	26.4439	35.0563	30.6318	16.1324	8.75266	5.72694	67.0663	49.6449	54.4497	56.0878	18.4111	38.1404	121.937	53.0217
Koike_CLKBMAL1_P0520	AR_G089	3_AR089	TSS	5.89948	46.2791	3.70499	36.3295	14.6764	4.86122	Ddx39	5.288	4.481	5.251	4.515	5.719	5.157	4.707	3.6	4.192	6.368	5.152	3.905	4.834	2.911	4.623	4.453	3.812	3.498	4.9	2.843	3.145	3.514	4.16	4.254	21.2548	41.1016	29.2259	28.8299	6.77785	7.44427	1.49247	30.0297	45.7104	40.1209	26.8246	7.89049	19.0702	34.8392	45.4472
Koike_CLKBMAL1_P0522	AR_G090	3_AR090	intron	0.165093	63.8796	5.29478	26.1843	8.82398	14.6511	Hs6st1	14.261	16.086	18.732	21.531	16.35	14.01	14.811	14.907	10.538	15.29	9.966	9.332	26.872	30.353	36.632	31.136	30.327	25.75	32.164	32.186	36.356	29.321	22.031	35.951	8.40405	23.1384	29.1271	29.2804	12.0993	6.11333	5.15424	66.0653	42.0073	47.5024	44.606	18.459	49.9992	34.8392	45.4472
Koike_CLKBMAL1_P0530	AR_G091	3_AR091	intron	4.75366	85.8125	4.01213	38.9634	7.18763	3.81287	Cnksr3	3.233	4.271	7.415	3.61	3.144	3.751	2.746	4.247	2.516	4.029	2.658	4.133	1.49	1.727	1.531	1.828	1.928	2.428	1.654	1.689	1.206	1.17	2.5	1.786	20.664	24.2403	39.3055	23.9021	6.16169	8.93313	4.58155	66.0653	57.2826	45.8524	43.59	18.9372	10.5768	69.6784	43.8405
Koike_CLKBMAL1_P0533	AR_G092	3_AR092	intergenic-10kbless	5.29415	69.8545	3.28683	28.3376	20.196	44.2113	Lifr	63.18	45.394	21.798	28.433	50.633	24.99	30.809	70.767	32.466	39.068	90.293	32.705	71.112	15.177	36.659	25.526	19.335	26.342	75.544	16.198	13.836	41.161	36.828	29.792	0.631852	28.6476	26.1378	17.1178	10.1388	5.39146	5.15424	45.0445	46.7519	60.1813	45.6221	7.60356	34.3745	34.8392	68.1708
Koike_CLKBMAL1_P0534	AR_G093	3_AR093	intron	7.40194	64.6304	4.99377	37.1307	11.005	12.4051	Ttc7	13.67	12.846	18.042	10.805	14.128	13.533	11.989	9.635	9.479	13.324	12.445	8.964	7.087	9.612	7.597	7.896	6.804	6.617	6.104	9.988	6.893	7.707	5.592	7.558	7.39934	27.1785	23.6426	24.7757	15.815	5.95542	4.89393	22.3858	38.1884	65.826	38.0015	10.0903	15.8651	34.8392	9.64031
Koike_CLKBMAL1_P0539	AR_G094	3_AR094	intron	5.05754	64.0073	5.03924	36.2772	10.7966	6.71608	Rexo4	6.606	7.206	6.001	6.053	7.853	6.433	7.709	6.628	5.272	10.347	4.623	5.861	5.213	6.127	6.8	7.427	5.865	6.49	4.657	5.648	5.795	6.045	6.481	5.842	14.2531	22.0366	42.5171	31.4508	11.7072	10.422	6.29963	32.8506	66.7719	45.9393	32.5147	7.89049	23.7977	34.8392	45.4472
Koike_CLKBMAL1_P0542	AR_G095	3_AR095	intron	4.08309	41.9296	3.31207	34.097	2.15258	3.30866	Rell1	3.575	3.757	3.591	3.213	3.132	3.547	3.121	6.192	1.637	2.313	2.613	3.012	4.217	3.006	2.18	2.658	2.95	2.872	3.72	2.527	2.852	3.006	3.125	3.116	0.15904	29.7494	45.6547	17.1178	4.92935	5.23355	5.69223	39.0386	28.8149	31.5235	26.723	23.6237	13.2209	78.3881	60.5962
Koike_CLKBMAL1_P0563	AR_G096	3_AR096	TTS	5.93272	51.0223	2.54688	36.0013	5.19384	23.275	Inhbe	28.194	37.639	52.471	9.359	16.822	19.171	31.426	11.359	39.493	16.675	5.244	11.447	18.756	38.218	25.889	30.158	32.491	39.684	26.704	47.376	26.178	20.375	24.102	25.879	4.64647	44.6408	32.6105	16.053	9.67198	9.67755	3.54029	46.3185	19.0942	34.3893	41.1514	7.89049	19.4708	172.084	90.8943
Koike_CLKBMAL1_P0564	AR_G097	3_AR097	TSS	5.71891	53.7937	3.3156	30.7106	20.1521	9.48148	Tatdn2	10.279	11.117	8.943	10.953	11.574	10.198	9.228	10.175	5.719	10.708	7.531	7.352	7.681	6.722	8.953	8.363	9.142	9.062	8.766	8.043	9.219	8.337	8.477	8.021	16.2996	35.8595	26.9036	16.1076	10.867	9.31662	0.572694	39.0386	53.2323	42.9866	36.8838	4.73429	10.5768	104.517	60.5963
Koike_CLKBMAL1_P0571	AR_G098	3_AR098	intergenic-10kbless	7.0578	61.4703	5.20689	44.4062	22.094	2.55613	Slc17a8	3.254	2.081	3.276	1.323	0.764	4.29	2.802	0.671	2.973	1.791	1.115	6.335	0.746	7.538	5.055	13.343	15.404	19.084	0.966	5.974	7.323	5.715	7.248	3.585	17.0065	25.3421	34.241	27.028	18.205	12.6553	6.29963	36.0356	38.1884	45.8524	53.6492	6.36021	20.4324	34.8392	68.1707
Koike_CLKBMAL1_P0575	AR_G099	3_AR099	intron	2.80824	43.6942	4.09488	43.166	15.1703	4.68548	1110059E24Rik	4.043	3.731	5.079	3.253	4.12	4.062	3.466	3.435	5.438	4.473	10.098	5.029	10.84	9.371	14.133	8.078	7.672	7.898	10.851	9.629	10.352	8.923	8.971	7.815	7.41703	38.9647	28.5342	26.5776	16.6366	5.95542	4.00886	33.0326	30.5507	22.9262	10.0592	6.31239	13.2209	17.4196	45.4472
Koike_CLKBMAL1_P0579	AR_G100	3_AR100	intron	5.83893	56.1448	3.94513	33.6388	2.63733	4.888	Dars	5.41	5.105	4.919	4.027	3.478	5.568	5.097	5.188	6.021	4.811	3.599	5.433	20.533	19.449	19.806	20.192	16.547	17.807	17.917	19.223	20.607	18.596	17.705	15.252	8.66923	25.3421	36.6868	15.3159	12.3234	10.8055	4.00886	39.0386	42.0073	48.7182	32.2098	15.781	7.93257	95.8077	37.8726
Koike_CLKBMAL1_P0583	AR_G101	3_AR101	intron	5.91732	65.9672	5.55958	29.7467	5.84043	10.4772	Tor1aip1	10.557	12.227	10.567	10.745	8.747	9.207	11.432	12.215	8.475	12.047	11.663	7.845	12.795	14.847	13.259	10.406	14.721	10.84	13.001	13.425	10.556	10.599	15.124	12.453	1.08895	17.6293	24.7543	18.8104	16.0204	3.72214	3.43616	37.2186	42.0073	45.8524	33.5307	12.9595	7.93257	32.9917	15.1491
Koike_CLKBMAL1_P0586	AR_G102	3_AR102	TSS	6.89337	46.985	5.88443	30.283	5.96877	9.2512	Fech	6.756	9.519	9.985	9.261	7.61	8.998	10.031	12.656	9.659	10.79	6.503	9.246	34.845	42.368	41.229	36.431	37.014	33.603	34.78	42.811	42.884	37.188	33.503	32.68	8.7475	18.8313	21.3203	18.3736	17.2527	8.03079	0.572694	27.0267	15.2754	37.2551	30.1777	4.73429	15.8651	0	17.9034
Koike_CLKBMAL1_P0588	AR_G103	3_AR103	TSS	3.71244	81.1853	2.68846	34.2178	11.1268	8.79087	Cnn3	6.235	8.294	11.104	9.754	7.863	11.441	8.791	6.302	9.378	12.19	5.083	9.056	34.183	52.235	48.412	49.712	45.85	43.877	31.162	51.225	45.564	49.054	43.972	42.339	11.9135	41.135	27.7189	18.0187	7.39402	8.1887	1.71808	54.0534	57.2826	63.0471	30.1777	20.324	39.6628	113.227	22.7236
Koike_CLKBMAL1_P0589	AR_G104	3_AR104	intergenic-10kbless	4.57153	55.1896	3.06559	36.2851	22.5524	14.7901	Nrp1	25.11	9.135	11.6	5.619	13.475	10.168	17.558	16.562	20.636	5.048	30.359	12.21	10.363	4.774	6.89	5.889	7.04	6.826	11.21	4.404	4.843	5.681	7.335	8.547	23.3546	34.8913	28.5342	22.9738	11.8192	11.9108	6.29963	42.0415	49.6449	25.792	46.8414	4.68647	21.1535	34.8392	37.8726
Koike_CLKBMAL1_P0593	AR_G105	3_AR105	intron	5.84969	55.195	3.93669	27.0267	7.7958	11.6791	Adh5	9.29	10.131	15.196	12.701	10.502	11.655	12.165	13.117	13.897	12.572	8.253	10.669	143.392	164.335	191.871	178.129	185.6	163.893	141.126	169.446	184.489	185.532	169.244	166.012	13.2652	27.5457	36.7609	20.9672	13.6304	3.72214	1.71808	36.0356	61.1015	48.7182	36.8838	12.6248	23.4772	43.549	15.1491
Koike_CLKBMAL1_P0596	AR_G106	3_AR106	intron	7.74969	84.2455	5.57061	35.5471	6.28723	5.10562	Ndufb9	5.385	6.174	5.354	6.983	3.644	5.596	4.843	4.654	5.107	4.572	4.511	4.442	145.666	159.305	163.472	155.429	157.115	147.431	130.403	166.596	164.732	144.316	146.692	143.91	10.0876	50.5172	60.5517	71.5151	32.825	16.2872	2.27342	63.0623	124.98	165.433	152.616	37.4918	44.9512	43.5489	30.2981
Koike_CLKBMAL1_P0601	AR_G107	3_AR107	TSS	6.61412	41.9262	4.73986	22.722	4.89045	10.3975	Ppm1a	8.303	12.557	12.408	8.917	6.799	10.829	10.715	9.518	15.154	8.394	8.762	12.414	24.262	39.061	33.958	27.746	33.945	32.272	26.278	43.979	44.685	28.78	28.901	27.776	8.58513	17.3288	32.5858	24.7757	7.52472	4.15075	3.21056	30.0297	42.0073	61.1366	33.5307	6.31239	13.2209	17.4196	7.57453
Koike_CLKBMAL1_P0606	AR_G108	3_AR108	intergenic-10kbless	6.07692	67.2905	5.56904	32.8872	1.77647	8.75173	Atxn10	7.931	9.108	9.03	7.072	7.896	9.547	9.018	11.378	7.982	8.344	8.91	8.803	16.862	16.947	14.441	15.914	14.325	18.986	16.174	17.404	20.173	11.962	14.033	14.104	4.75732	23.1384	26.4837	28.9937	15.4229	4.66959	1.14539	49.6855	38.1884	54.6234	46.943	8.75127	10.5768	39.0621	22.7236
Koike_CLKBMAL1_P0613	AR_G109	3_AR109	TSS	5.56576	55.41	2.59185	24.5277	23.4669	19.1182	Qdpr	18.487	24.154	14.224	13.095	22.805	34.339	24.261	24.456	14.608	12.478	7.786	18.725	183.348	285.541	231.215	177.393	206.254	200.074	151.776	267.619	246.92	167.884	211.147	168.234	7.94948	33.0549	34.241	12.6131	6.57246	7.44427	2.29078	51.0504	60.87	71.297	47.1463	13.629	21.1535	123.785	22.7236
Koike_CLKBMAL1_P0616	AR_G110	3_AR110	intron	3.53973	74.163	3.98228	34.3836	4.97847	9.17665	Vps37a	7.565	8.75	8.187	8.022	6.726	9.433	10.481	9.826	13.194	10.255	7.109	10.572	7.06	6.194	5.506	6.275	5.877	6.501	7.027	6.442	6.166	6.435	5.48	6.392	2.07303	28.1133	30.9058	21.1447	8.88776	5.95542	3.03701	45.0445	64.4574	40.1209	30.1777	16.7374	31.7303	52.2588	12.3947
Koike_CLKBMAL1_P0617	AR_G111	3_AR111	intron	8.40913	31.676	3.37375	23.442	5.86982	11.6612	Zfp395	5.24	17.432	10.257	13.937	12.58	10.721	11.031	19.088	6.226	13.561	7.503	12.36	3.499	7.632	4.47	4.584	4.544	5.469	2.402	7.934	4.585	4.61	7.901	5.867	10.6092	30.8512	25.2484	21.3904	9.01847	12.2492	4.92864	22.7498	30.5507	34.3893	49.3816	15.2071	10.5768	73.1095	45.4472
Koike_CLKBMAL1_P0619	AR_G112	3_AR112	intron	5.64032	66.1208	4.44203	26.0114	19.0299	31.5431	BC046487	47.241	29.704	26.291	30.391	40.998	24.337	36.014	24.966	24.691	27.105	46.329	20.45	2.643	1.912	1.649	2.097	1.491	1.647	1.128	2.928	1.991	2.193	1.463	1.575	7.59	32.5874	32.9316	28.4204	16.9166	6.94799	6.00461	27.0267	91.8836	52.7129	45.3173	18.9372	20.192	69.6783	37.8726
Koike_CLKBMAL1_P0624	AR_G113	3_AR113	TSS	5.53361	54.3351	2.59624	23.8202	23.4669	19.1182	Qdpr	18.487	24.154	14.224	13.095	22.805	34.339	24.261	24.456	14.608	12.478	7.786	18.725	183.348	285.541	231.215	177.393	206.254	200.074	151.776	267.619	246.92	167.884	211.147	168.234	7.94948	33.0549	34.2904	12.695	6.77785	7.44427	2.29078	51.0504	61.1015	71.4707	47.7559	12.9117	21.1535	118.242	22.7236
Koike_CLKBMAL1_P0631	AR_G114	3_AR114	intergenic-10kbless	7.10475	50.5861	3.80543	32.3127	5.19656	18.1687	Nfib	14.982	19.291	20.752	17.294	14.407	19.434	16.523	18.324	21.951	16.982	14.688	23.395	5.696	7.415	7.297	7.336	7.983	7.56	4.984	7.445	7.469	6.562	7.354	5.602	13.1394	25.3421	41.2572	18.2644	9.89604	5.18843	5.15424	26.7537	34.3696	41.684	33.5307	7.55574	9.93574	17.4196	33.282
Koike_CLKBMAL1_P0633	AR_G115	3_AR115	intron	6.07285	80.1608	3.58016	30.301	4.15614	10.2309	Col4a3bp	7.976	10.086	10.435	7.908	7.31	10.965	10.889	11.763	16.42	8.906	6.749	13.363	2.202	3.533	2.753	2.817	3.506	2.666	2.708	3.702	2.951	2.707	3.151	2.477	10.1029	30.8512	26.0884	18.4692	16.0764	8.1887	5.13689	66.0653	45.1318	71.6444	51.0074	12.6248	19.4708	95.8077	19.9692
Koike_CLKBMAL1_P0637	AR_G116	3_AR116	intergenic-10kbless	7.51113	75.1347	5.18293	22.7592	3.9442	28.4376	AK007376	12.499	25.563	36.802	9.844	16.513	46.919	35.904	42.744	66.851	11.024	6.164	30.423	35.013	93.048	49.029	34.342	38.218	62.656	28.58	81.054	71.336	34.771	80.129	52.176	6.64937	25.3421	22.8273	28.3795	10.4749	8.1887	2.86347	42.0415	45.8261	77.376	60.3553	18.9372	29.0861	87.098	45.4471
Koike_CLKBMAL1_P0645	AR_G117	3_AR117	intergenic-10kbless	4.80427	88.5671	5.54929	35.9247	7.77913	33.9296	Zfp36	24.185	28.94	45.967	47.206	20.62	35.106	38.69	27.787	50.355	32.241	16.866	39.194	19.139	41.334	30.791	17.754	21.282	18.28	16.874	40.192	34.267	28.191	37.501	23.966	8.94518	25.8763	39.4043	29.0483	16.8233	9.67755	7.44502	67.1573	72.558	88.9259	20.8297	33.1401	15.8651	56.4817	50.2674
Koike_CLKBMAL1_P0647	AR_G118	3_AR118	intron	5.37701	77.8783	5.33895	31.7637	6.95964	26.9152	Fgd6	21.725	29.368	22.945	34.578	20.313	23.358	29.93	34.151	26.523	32.658	21.548	25.887	4.646	4.521	3.271	5.4	5.473	4.711	4.43	4.414	4.971	4.861	5.783	3.733	16.9487	17.6293	30.98	23.3015	13.1263	11.9108	3.73119	45.0445	53.4638	74.076	40.2369	11.0467	21.5542	34.8392	22.7236
Koike_CLKBMAL1_P0655	AR_G119	3_AR119	intron	6.47693	79.0736	4.68727	34.9037	22.2353	8.33052	Tmem19	8.051	9.086	7.51	8.151	7.328	8.96	12.133	6.738	6.501	7.038	7.389	11.082	38.71	35.279	35.444	41.038	38.872	47.691	35.156	35.62	32.732	32.956	38.098	46.665	21.3044	26.4439	30.1647	20.7215	18.4477	6.69985	6.45582	42.9515	55.4311	51.584	57.0023	12.6248	21.1535	19.0032	37.8726
Koike_CLKBMAL1_P0664	AR_G120	3_AR120	intergenic-10kbless	9.01881	79.0953	5.97212	32.1173	22.5937	2.70136	Slc13a2	2.177	3.211	0.458	0.846	2.42	6.714	3.118	6.033	0.196	1.277	0.922	5.042	1.084	0.568	1.094	0.321	1.105	1.156	0.546	0.363	0.256	1.411	2.187	1.082	18.8937	18.7311	22.0121	22.9738	15.4042	9.47453	5.15424	54.0534	19.0942	51.584	70.4146	12.29	13.2209	87.0979	22.7236
Koike_CLKBMAL1_P0669	AR_G121	3_AR121	intron	3.21192	56.7252	5.8592	32.339	6.28723	5.10562	Ndufb9	5.385	6.174	5.354	6.983	3.644	5.596	4.843	4.654	5.107	4.572	4.511	4.442	145.666	159.305	163.472	155.429	157.115	147.431	130.403	166.596	164.732	144.316	146.692	143.91	10.0876	11.0183	32.6105	24.3252	14.788	6.69985	3.43616	51.8694	38.1884	31.9577	30.1777	9.46859	26.4419	0	75.7453
Koike_CLKBMAL1_P0670	AR_G122	3_AR122	intron	5.02692	72.0362	4.57461	32.9576	15.3858	67.0505	Adk	52.174	52.412	58.331	67.197	39.29	91.569	65.844	53.564	94.343	73.996	77.412	78.474	82.137	98.804	103.071	107.656	110.643	110.001	77.947	99.992	98.129	93.257	96.362	90.838	14.5712	24.2403	34.6116	20.2028	13.3316	9.36174	3.41881	36.0356	56.704	44.3761	33.5307	11.0467	26.4419	43.8129	30.2981
Koike_CLKBMAL1_P0674	AR_G123	3_AR123	intron	7.16996	43.2895	4.58718	28.0848	4.62941	56.6447	Abcc6	43.529	74.658	54.747	62.257	40.356	56.692	66.722	82.084	47.867	60.391	44.706	45.727	13.761	21.031	20.312	7.939	17.68	18.859	14.516	21.157	17.208	8.723	20.919	16.405	3.49329	22.0366	28.5342	22.7691	10.4749	6.81264	3.43616	15.0148	49.6449	31.5235	36.8838	7.89049	5.28838	43.5489	17.9034
Koike_CLKBMAL1_P0678	AR_G124	3_AR124	TSS	3.05944	57.5121	3.51601	30.9333	14.6121	5.16464	Pip5k1c	4.812	5.051	4.873	5.917	6.093	4.867	5.682	5.793	2.893	6.524	5.651	3.821	3.557	3.174	3.136	3.599	3.484	3.127	3.38	4.069	3.059	3.346	3.791	4.331	21.8962	25.3421	26.459	15.7664	9.93338	7.44427	2.29078	42.0415	48.8349	31.5235	13.4123	11.1423	28.3649	104.517	30.2981
Koike_CLKBMAL1_P0684	AR_G125	3_AR125	intron	8.65487	47.1423	4.25729	25.3963	8.06954	11.3703	Utrn	10.654	12.131	9.33	13.157	10.776	7.823	13.705	13.154	11.441	13.923	11.939	8.411	2.465	3.008	2.328	2.554	2.372	2.832	2.52	2.777	2.68	2.539	2.634	2.611	4.05587	27.4456	19.2945	16.6673	14.4333	10.422	5.67487	22.6588	19.0942	31.5235	45.7237	7.89049	10.5768	87.0979	60.5962
Koike_CLKBMAL1_P0690	AR_G126	3_AR126	intron	5.70246	52.4423	4.99762	26.2998	9.33584	5.84879	Dnmt3a	5.228	6.259	8.421	7.802	6.51	4.504	5.299	6.391	4.242	6.714	5.076	3.74	2.013	1.328	1.259	1.535	1.157	1.139	1.496	1.52	1.077	1.424	1.685	1.386	1.08311	20.1668	34.9327	25.6766	9.8587	5.21099	2.18665	27.0267	68.7391	34.3893	33.5307	9.51641	7.93257	34.8392	23.8712
Koike_CLKBMAL1_P0702	AR_G127	3_AR127	intron	7.82105	73.511	4.60785	24.2608	15.984	22.2014	1110038D17Rik	24.531	15.957	20.172	29.006	26.713	24.293	24.569	16.129	17.849	26.707	20.253	20.237	25.355	24.883	21.786	24.074	30.357	25.009	26.119	23.259	25.736	25.654	25.951	27.136	19.9912	19.7995	31.1529	21.9501	11.7072	6.69985	4.58155	33.0326	68.7391	79.4602	63.7084	9.46859	15.8651	40.9096	60.5962
Koike_CLKBMAL1_P0710	AR_G128	3_AR128	TSS	3.61728	81.2511	2.95538	22.8706	12.0153	10.5559	Ip6k1	6.355	10.302	10.261	15.567	10.908	8.987	9.453	12.717	6.703	15.264	11.345	8.809	11.407	13.834	13.309	13.115	11.328	11.702	11.772	12.613	10.073	12.266	13.199	11.753	10.4669	33.0549	21.1968	15.3159	4.98536	5.95542	2.5858	45.6815	80.1957	40.1209	30.1777	15.781	34.3745	34.8392	7.57453
Koike_CLKBMAL1_P0712	AR_G129	3_AR129	TSS	5.52298	37.481	5.27449	27.4041	6.77554	8.98391	Ndufa6	6.575	10.615	8.601	9.795	7.38	12.164	9.111	8.495	10.052	8.837	8.129	8.054	115.421	138.288	116.847	135.514	109.277	121.628	113.296	142.237	127.056	88.377	113.009	87.058	7.2392	16.4273	23.6426	19.4111	11.7072	3.72214	2.86347	12.0119	42.0073	14.6762	34.8516	14.2029	8.49346	34.8392	45.4472
Koike_CLKBMAL1_P0720	AR_G130	3_AR130	intron	7.44026	74.8716	4.68576	25.2703	15.984	22.2014	1110038D17Rik	24.531	15.957	20.172	29.006	26.713	24.293	24.569	16.129	17.849	26.707	20.253	20.237	25.355	24.883	21.786	24.074	30.357	25.009	26.119	23.259	25.736	25.654	25.951	27.136	19.9912	20.9348	31.7705	22.0729	11.7072	6.60961	4.58155	30.9397	68.7391	80.2417	63.7084	9.46859	15.8651	43.549	60.5962
Koike_CLKBMAL1_P0727	AR_G131	3_AR131	intron	6.72609	66.8999	3.84591	31.2328	22.493	7.18917	Slc25a44	6.862	7.54	6.977	5.287	8.604	10.533	9.42	5.163	7.846	7.131	3.983	6.925	14.86	21.05	19.367	24.177	20.248	21.656	14.129	19.615	22.571	19.065	17.438	16.99	12.6233	20.9348	39.7255	18.5784	4.31318	4.80494	4.00886	24.0237	38.1884	68.7786	28.7552	9.27731	21.1535	8.70978	0
Koike_CLKBMAL1_P0729	AR_G132	3_AR132	intron	4.38447	59.2505	2.46485	28.7827	18.7537	26.4157	Slc6a13	15.025	33.103	25.756	16.53	33.806	36.987	24.389	25.307	20.721	35.633	16.967	32.766	38.509	39.964	28.735	39.69	39.857	36.671	40.223	40.856	36.269	33.407	41.56	37.46	23.3076	33.0549	22.8273	11.3845	8.01019	8.93313	1.71808	33.0326	57.2826	42.9866	13.4123	13.5812	16.1055	60.9685	30.2981
Koike_CLKBMAL1_P0731	AR_G133	3_AR133	intron	6.10546	49.5493	3.02864	26.0519	12.2504	8.54662	Arhgef1	7.026	8.449	7.919	11.442	11.477	6.403	9.745	8.889	4.824	13.476	7.422	5.488	5.058	4.825	4.363	5.109	4.834	4.64	4.083	4.736	4.03	5.33	5.175	4.915	17.7323	28.6476	21.1968	17.8958	2.3153	3.72214	2.86347	9.0089	53.3481	40.8156	20.1184	7.89049	10.5768	8.70978	0
Koike_CLKBMAL1_P0733	AR_G134	3_AR134	intron	5.06292	33.2966	4.5505	17.1756	15.8185	7.63104	2210016L21Rik	6.863	7.513	7.807	7.7	10.396	8.471	8.304	7.691	4.876	9.354	6.701	5.897	4.449	5.18	4.29	4.211	3.585	4.394	3.112	4.898	3.703	3.115	4.118	4.632	4.06252	21.7027	26.8048	19.0425	8.98112	2.97771	1.68337	40.9496	51.1493	35.5183	20.2201	3.1562	10.5768	69.6783	27.3142
Koike_CLKBMAL1_P0734	AR_G135	3_AR135	intergenic-10kbless	8.35766	67.2519	4.51162	22.2925	22.4684	26.19	Adipor2	46.031	23.777	22.718	9.292	16.108	27.037	27.771	19.605	35.012	11.961	53.596	21.371	92.389	139.534	102.218	71.18	131.667	112.903	110.263	136.872	147.843	50.355	116.336	104.739	4.2438	27.5457	26.9036	19.6977	13.481	5.95542	2.88082	48.0475	34.3696	85.9733	86.2655	19.0806	26.4419	43.5489	42.9223
Koike_CLKBMAL1_P0739	AR_G136	3_AR136	intron	5.19561	48.453	3.15443	28.8	14.6835	20.9306	Shb	15.664	26.057	12.536	25.749	36.43	19.27	13.845	21.804	6.433	35.227	21.114	17.037	5.487	4.547	4.068	6.304	3.157	5.38	6.621	4.718	4.233	6.482	5.313	6.971	22.1168	28.6476	30.98	16.7082	6.01231	8.93313	4.00886	21.0208	61.1015	18.2368	33.5307	6.31239	13.2209	34.8392	22.7236
Koike_CLKBMAL1_P0743	AR_G137	3_AR137	TSS	8.10805	29.0087	4.71996	33.2121	13.0842	8.10873	Zfp281	5.509	8.021	6.865	12.536	8.005	6.381	6.131	7.319	8.062	9.2	9.012	10.263	4.416	4.973	4.611	6.899	5.208	5.199	5.487	5.442	4.793	5.138	5.746	5.607	16.9757	23.1384	25.2731	23.8748	11.2217	9.67755	5.72694	9.0089	15.2754	35.2577	17.2734	6.31239	2.64419	8.7098	30.2981
Koike_CLKBMAL1_P0746	AR_G138	3_AR138	intron	3.99344	38.3122	2.9705	37.1929	12.6697	39.2697	Sdc4	22.515	37.463	25.892	70.133	37.309	30.596	30.118	44.361	18.213	80.159	35.518	38.96	112.535	77.399	99.825	106.599	85.467	82.586	95.946	68.208	96.809	108.976	91.414	88.188	14.4993	37.0949	39.9478	17.1178	6.77785	3.72214	4.47742	33.0326	22.913	31.5235	6.70615	4.54301	5.28838	52.2588	22.7236
Koike_CLKBMAL1_P0752	AR_G139	3_AR139	exon	7.12157	34.3426	6.04896	23.1084	9.54781	4.55957	Ecsit	3.995	5.086	4.367	5.148	5.547	4.938	4.864	5.219	3.196	6.258	3.057	3.041	16.115	16.184	16.687	16.105	14.25	14.529	14.677	15.474	16.978	16.977	16.78	14.57	10.8957	19.4323	28.0154	30.5226	15.983	5.21099	4.49478	21.0208	30.5507	47.7629	36.1726	8.17742	5.28838	0	15.1491
Koike_CLKBMAL1_P0754	AR_G140	3_AR140	intron	6.14993	20.5075	3.96159	15.3019	17.2548	16.7272	Pik3r1	19.033	18.034	12.119	13.648	18.463	16.204	17.371	11.661	15.833	20.898	22.81	14.653	8.645	8.992	13.421	12.628	11.62	11.719	10.1	10.949	13.295	11.825	8.454	10.529	12.3256	18.7311	41.6278	14.8654	6.16169	4.46656	4.00886	6.00593	45.8261	40.1209	15.2412	4.73429	5.28838	0	37.8726
Koike_CLKBMAL1_P0763	AR_G141	3_AR141	intergenic-10kbless	3.63303	70.2219	3.97496	30.6863	5.24803	11.7766	Cyp1a2	3.992	31.395	23.924	10.844	5.217	12.97	9.776	13.351	8.313	9.488	1.517	10.532	192.357	201.926	318.047	270.538	171.376	155.64	192.764	212.818	143.594	639.548	213.45	155.678	13.0043	27.479	25.7919	17.5682	11.4271	5.21099	4.58155	60.0593	64.9203	37.2551	25.0973	14.2029	7.93257	69.6784	30.2981
Koike_CLKBMAL1_P0772	AR_G142	3_AR142	intron	6.2697	57.9745	3.84124	25.096	9.399	6.12184	Slc4a2	5.748	6.079	5.716	7.138	6.08	5.779	7.965	6.175	4.448	8.784	4.539	5.011	5.573	5.193	5.043	5.483	4.754	5.69	5.905	6.388	5.211	6.364	5.294	6.399	1.25008	25.3421	31.6964	17.5682	6.16169	2.23328	1.71808	27.0267	40.85	40.1209	42.3707	11.0467	34.3745	52.2588	53.0217
Koike_CLKBMAL1_P0775	AR_G143	3_AR143	TSS	2.50106	40.1466	3.00346	21.9355	6.78634	7.52337	Zfp36l2	6.697	9.108	9.089	6.606	5.773	5.723	8.821	7.534	9.967	7.268	9.159	4.534	7.276	14.768	8.949	9.063	11.524	9.733	6.971	12.252	13.453	9.329	14.02	9.274	11.362	24.2403	22.8273	13.0499	6.16169	2.23328	3.43616	42.0415	38.1884	20.0604	23.0651	6.31239	18.5093	43.5489	32.1344
Koike_CLKBMAL1_P0776	AR_G144	3_AR144	intergenic-10kbless	8.70381	84.142	7.81306	35.5203	11.9299	33.19	Gpt2	11.643	35.054	36.4	53.422	24.998	43.486	23.002	22.21	27.737	69.112	23.88	27.334	36.884	96.711	71.036	77.837	92.081	63.734	34.244	109.956	105.532	71.234	51.975	31.316	10.3333	18.3972	19.9122	36.2558	19.1012	14.1441	2.86347	36.0356	26.7319	94.5706	70.4146	11.0467	15.8651	43.549	53.0217
Koike_CLKBMAL1_P0778	AR_G145	3_AR145	intron	9.20301	66.5057	4.64348	28.3048	4.34658	5.4047	Agl	4.945	5.532	5.093	2.313	2.914	5.322	8.021	5.687	11.913	5.05	3.176	4.891	2.487	5.054	4.511	4.098	4.659	3.957	3.084	4.974	4.509	3.934	3.787	3.558	10.8121	19.8329	26.5825	19.4657	11.7072	7.53451	2.86347	30.0297	15.2754	71.6444	65.8422	14.2029	15.8651	26.1294	36.9545
Koike_CLKBMAL1_P0786	AR_G146	3_AR146	intron	5.09079	80.6865	3.74495	32.604	4.58687	29.3679	Ppap2b	26.634	37.885	47.42	20.764	23.246	31.763	37.524	21.596	31.917	33.525	9.603	30.537	30.94	57.328	47.56	39.849	42.175	41.728	28.37	52.229	48.514	36.323	47.931	37.989	9.7522	27.5457	34.241	20.9809	8.86909	6.69985	5.72694	39.0386	72.3265	42.9866	57.0023	3.1562	33.0924	52.2587	68.1707
Koike_CLKBMAL1_P0793	AR_G147	3_AR147	intergenic-10kbless	6.43793	50.3343	6.36611	21.0944	6.57409	5.16339	Mrpl39	3.583	6.293	4.605	6.082	2.82	3.62	6.807	6.798	5.042	7.717	4.02	4.573	15.169	16.287	14.453	13.982	15.086	13.427	13.427	15.155	15.703	12.942	14.273	14.397	6.53101	10.8847	27.9907	16.954	19.1012	6.49682	6.24757	42.0415	34.3696	63.0471	43.59	14.2029	23.7977	0	4.82016
Koike_CLKBMAL1_P0795	AR_G148	3_AR148	intron	4.04554	51.2646	4.85575	24.0636	20.6761	6.98426	Arid1b	7.555	7.279	6.862	8.03	6.869	6.889	7.653	6.455	6.033	6.793	7.13	6.262	1.942	2.323	1.817	1.764	1.99	2.054	2.191	1.799	1.742	1.874	1.891	2.366	0.188502	17.6293	24.4579	18.8377	14.4893	3.69958	6.87233	27.0267	34.3696	34.3893	30.7873	6.31239	29.0861	34.8392	15.1491
Koike_CLKBMAL1_P0798	AR_G149	3_AR149	intron	5.04538	48.3262	3.84877	26.375	17.9739	17.9898	St3gal4	23.155	11.876	11.065	14.728	26.486	18.586	21.96	14.619	12.31	22.578	24.875	13.638	22.359	17.639	26.54	24.786	23.029	18.912	25.766	19.385	28.374	20.146	24.303	25.276	13.8114	29.2486	31.227	20.6806	15.3109	10.422	6.29963	48.0475	42.0073	43.7682	46.943	17.3591	13.2209	52.2588	45.4471
Koike_CLKBMAL1_P0802	AR_G150	3_AR150	intergenic-10kbless	4.63621	34.3479	6.08916	22.5075	22.5937	2.70136	Slc13a2	2.177	3.211	0.458	0.846	2.42	6.714	3.118	6.033	0.196	1.277	0.922	5.042	1.084	0.568	1.094	0.321	1.105	1.156	0.546	0.363	0.256	1.411	2.187	1.082	18.8937	15.4256	19.5663	24.8713	13.5557	6.65473	4.58155	30.0297	19.0942	34.3893	13.4123	4.73429	7.93257	54.3702	22.7236
Koike_CLKBMAL1_P0804	AR_G151	3_AR151	intron	7.86647	52.8396	4.33611	30.1517	6.28723	5.10562	Ndufb9	5.385	6.174	5.354	6.983	3.644	5.596	4.843	4.654	5.107	4.572	4.511	4.442	145.666	159.305	163.472	155.429	157.115	147.431	130.403	166.596	164.732	144.316	146.692	143.91	10.0876	33.1884	53.832	41.6478	18.0929	13.129	6.87233	43.2245	62.6058	97.1759	92.6668	21.9499	20.5125	75.4849	53.0217
Koike_CLKBMAL1_P0805	AR_G152	3_AR152	TSS	8.79381	51.0102	4.57002	26.0433	11.0065	12.1554	Gtpbp2	10.772	12.292	12.878	11.936	12.657	10.689	13.84	13.57	8.983	14.815	13.666	9.767	4.925	5.212	3.734	3.625	3.888	4.029	5.173	5.384	4.237	3.89	5.07	3.615	3.84804	18.464	18.751	20.271	11.3338	4.15075	5.15424	21.0208	15.2754	48.284	33.5307	12.6248	21.1535	26.1294	15.1491
Koike_CLKBMAL1_P0806	AR_G153	3_AR153	TSS	6.10078	110.611	3.72363	29.6408	7.18369	10.4923	Hbp1	7.017	9.32	12.108	9.562	7.076	9.837	9.494	11.562	18.672	9.21	8.717	13.333	17.312	17.882	15.852	17.532	17.581	18.174	15.779	17.915	16.707	14.531	16.35	15.262	3.3096	29.7494	33.0305	22.8783	11.091	9.67755	5.24102	83.5371	82.7416	94.2232	67.0615	26.8277	29.0861	134.606	50.9559
Koike_CLKBMAL1_P0809	AR_G154	3_AR154	intron	6.71673	50.4585	5.42102	38.0061	3.07454	5.94583	Epb4.1l5	4.599	5.941	5.055	5.792	3.994	7.084	7.54	7.357	7.051	6.187	4.699	6.052	5.327	6.183	5.135	5.486	4.778	5.978	5.606	5.805	4.427	6.306	5.214	5.414	2.51779	22.0366	34.488	24.3252	16.0204	9.67755	3.43616	39.0386	19.0942	31.5235	33.5307	20.5153	15.8651	95.8077	53.0217
Koike_CLKBMAL1_P0815	AR_G155	3_AR155	TSS	5.65015	69.7514	3.23593	25.4262	13.6377	7.88983	Irs2	3.538	3.624	6.511	20.476	7.482	4.528	3.677	13.322	2.733	5.056	14.023	9.71	1.206	1.435	0.442	0.615	0.983	1.008	0.775	1.085	0.612	1.292	2.745	1.788	20.5068	27.5457	13.0442	15.3159	7.39402	2.97771	2.29078	42.0415	38.1884	57.3155	26.8246	6.31239	7.93257	34.8392	22.7236
Koike_CLKBMAL1_P0824	AR_G156	3_AR156	TSS	5.71121	73.4908	2.85093	25.2347	1.19575	5.59459	Rassf6	5.245	5.7	4.758	2.216	5.814	7.63	7.938	7.25	8.58	2.928	3.213	5.864	2.532	5.01	3.13	3.423	3.246	3.632	3.483	4.767	3.865	2.902	2.542	3.59	6.07379	29.6158	20.3815	18.6193	7.18863	9.04592	3.43616	39.0386	57.3983	51.3234	45.2157	20.5153	27.3233	104.517	30.2981
Koike_CLKBMAL1_P0825	AR_G157	3_AR157	intron	5.07176	23.6484	3.10806	29.9572	6.4165	10.2708	Rffl	8.305	13.742	14.258	7.915	11.45	9.619	9.301	11.262	7.201	12.43	7.725	10.043	6.856	6.278	4.76	5.188	5.341	6.612	5.955	5.758	5.085	5.362	6.309	6.286	23.9917	33.0549	39.1326	11.7122	3.69701	3.00027	1.71808	9.0089	34.3696	14.3289	10.0592	1.5781	2.64419	0	7.57453
Koike_CLKBMAL1_P0826	AR_G158	3_AR158	intron	15.6409	31.3216	3.35087	27.0969	13.0366	7.55166	Madd	7.544	6.243	10.691	8.948	8.832	6.452	8.002	6.865	3.804	9.005	8.794	5.442	1.479	2.369	2.073	1.976	2.533	1.78	2.024	2.577	2.398	2.2	2.155	1.805	10.9928	33.8228	21.1968	23.1376	7.39402	8.1887	5.18895	27.0267	11.4565	20.0604	23.4715	14.2029	18.5093	26.1294	30.2981
Koike_CLKBMAL1_P0827	AR_G159	3_AR159	TSS	3.28523	45.2921	4.59069	21.2967	18.7722	8.86756	Sil1	9.454	8.305	8.4	9.478	11.27	8.361	8.967	7.75	8.367	7.789	7.577	10.693	17.038	11.745	9.758	9.607	11.107	12.778	14.184	12.508	16.055	11.336	14.228	14.117	1.31115	19.0984	22.3332	14.3194	10.6989	8.1887	2.22136	36.0356	45.8261	31.5235	26.8246	15.781	23.7977	60.9685	22.7236
Koike_CLKBMAL1_P0828	AR_G160	3_AR160	intron	8.36661	36.2669	5.97146	27.5844	6.53668	6.90738	Zfp609	7.92	6.938	5.555	7.224	7.802	5.494	6.548	9.603	5.803	7.587	7.57	4.845	3.097	1.817	2.664	2.013	3.059	2.328	3.294	1.993	2.196	2.288	3.06	2.232	21.6199	20.9348	14.6747	21.0218	17.1033	9.67755	4.11298	18.0178	26.7319	34.3893	41.6594	7.89049	10.5768	34.8392	11.0175
Koike_CLKBMAL1_P0830	AR_G161	3_AR161	intergenic-10kbless	8.84216	41.868	5.6402	25.976	7.76525	7.11103	Adcy6	6.579	8.138	11.785	7.361	6.394	5.316	9.518	5.271	6.105	10.76	4.203	3.902	2.329	6.84	4.181	3.881	5.032	3.062	2.583	6.831	5.424	3.455	3.856	3.68	8.83114	16.5274	20.3815	27.929	10.7549	4.46656	2.86347	15.0148	19.0942	34.3893	36.8838	7.89049	5.28838	26.1294	30.2981
Koike_CLKBMAL1_P0833	AR_G162	3_AR162	intron	6.36262	77.8754	3.6334	33.975	4.1313	14.1485	Pgm2	13.754	15.928	16.651	11.726	10.128	17.304	16.368	14.225	18.184	14.06	8.884	12.568	36.49	65.795	58.924	46.06	57.871	47.212	43.085	67.66	67.13	49.944	50.061	46.757	9.43716	30.7177	29.9671	21.2539	10.4749	7.44427	3.43616	45.0445	38.1884	48.7182	46.943	12.6248	22.9964	34.8392	30.2981
Koike_CLKBMAL1_P0834	AR_G163	3_AR163	intron	6.49743	42.4014	3.49181	28.3238	13.8165	9.86943	Pex26	10.819	8.667	9.09	9.224	11.796	6.819	10.397	6.987	10.31	12.198	16.057	6.068	4.565	4.627	10.822	3.871	5.052	3.353	4.056	6.642	5.913	4.3	4.001	3.771	9.17279	26.4439	32.9563	18.4692	8.42097	12.4748	3.43616	16.1068	42.0073	36.1261	30.1777	9.46859	5.28838	8.70978	60.5962
Koike_CLKBMAL1_P0843	AR_G164	3_AR164	intergenic-10kbless	3.40525	46.1261	2.54542	20.1829	11.8947	46.1782	Nlrp6	29.202	46.996	28.242	73.761	50.823	30.797	54.371	60.461	22.018	83.51	49.103	24.853	31.351	31.843	31.589	40.811	27.103	28.696	28.691	29.618	23.039	38.41	33.807	31.079	14.9132	36.5273	27.7189	13.4867	9.70932	6.69985	2.88082	49.3215	38.1884	56.0997	23.5731	20.5153	31.7303	69.6783	30.2981
Koike_CLKBMAL1_P0846	AR_G165	3_AR165	TSS	7.02662	59.027	3.66858	30.7662	9.84422	5.2839	Cbx5	4.401	4.838	6.041	5.74	4.91	5.211	5.319	5.807	5.079	6.659	5.002	4.4	3.809	3.983	4.86	5.248	4.772	4.755	3.955	4.85	4.306	4.953	4.779	4.756	15.2891	31.9531	20.7274	17.5682	12.9395	6.81264	2.86347	21.0208	38.1884	42.9866	36.8838	12.6248	14.5831	34.8392	30.2981
Koike_CLKBMAL1_P0848	AR_G166	3_AR166	intron	4.24153	97.0526	4.70171	35.4339	5.74947	12.4548	Pank1	11.653	11.794	21.27	8.711	5.647	11.101	13.454	12.034	26.005	7.188	8.592	12.009	35.445	66.152	59.561	51.818	55.089	55.865	33.197	69.116	79.109	47.841	44.783	39.052	9.81193	25.4756	23.6426	25.2262	11.091	10.422	4.58155	51.0504	87.8333	51.584	33.5307	25.2496	29.0861	26.1294	15.1491
Koike_CLKBMAL1_P0849	AR_G167	3_AR167	intron	6.61297	53.1029	5.90176	28.1156	21.3701	19.1554	Wwc1	19.207	26.577	13.908	11.616	31.768	21.659	23.847	19.253	9.103	16.312	17.475	19.14	9.701	14.336	12.289	18.346	15.598	15.866	11.994	15.356	13.792	17.616	13.618	15.878	15.4573	11.0183	23.0744	17.2133	12.3234	9.67755	6.35169	27.0267	26.7319	32.6525	36.8838	6.31239	15.8651	34.8392	30.2981
Koike_CLKBMAL1_P0850	AR_G168	3_AR168	intron	5.95881	54.301	2.75238	23.5401	3.73371	3.89183	Lrtm1	4.124	6.448	6.899	4.805	1.667	6.072	7.091	0.899	5.888	0.626	0.394	1.789	0.239	7.014	4.468	7.988	4.785	9.286	0.915	4.526	7.48	3.927	2.665	7.203	14.2312	20.9348	18.751	10.3744	10.4002	8.1887	6.3864	33.0326	38.1884	25.792	40.2369	11.0467	13.2209	95.8077	60.5962
Koike_CLKBMAL1_P0855	AR_G169	3_AR169	intergenic-10kbless	5.59439	76.362	3.70195	31.1909	4.08598	23.8721	F11	10.657	37.188	31.329	27.745	11.472	22.241	28.908	45.872	14.629	18.402	9.191	28.829	36.322	18.073	23.073	26.103	15.948	25.03	32.427	14.997	11.926	33.899	18.611	21.039	23.4147	29.7494	34.241	15.3159	12.5288	2.97771	3.43616	45.0445	72.3265	67.3023	48.4672	11.0467	21.1535	60.9686	68.1707
Koike_CLKBMAL1_P0858	AR_G170	3_AR170	intron	2.49543	47.8346	3.85682	24.7421	4.09437	14.6965	Atrn	12.251	18.384	12.883	12.654	11.719	13.302	14.244	16.61	15.58	16.977	13.644	18.109	7.636	10.808	9.314	10.423	8.521	10.854	8.541	9.722	9.79	8.015	10.7	9.886	15.3171	24.2403	18.751	16.2168	8.12222	8.93313	2.88082	33.0326	34.3696	27.6157	16.7654	14.2029	23.7977	17.4196	15.1491
Koike_CLKBMAL1_P0878	AR_G171	3_AR171	intron	6.32309	25.9324	5.32174	18.645	9.5416	4.05962	Smad7	5.023	5.558	3.026	5.906	5.617	2.956	2.215	5.654	1.846	6.566	2.431	1.917	2.431	1.845	1.127	1.191	1.74	1.987	1.087	1.591	1.765	1.058	1.886	1.11	0.99988	15.4256	17.9358	15.7664	12.3794	3.72214	0.572694	15.0148	26.7319	22.9262	26.8246	6.31239	2.64419	0	0
Koike_CLKBMAL1_P0880	AR_G172	3_AR172	intron	3.38492	62.2931	3.23893	32.5423	4.46849	11.428	Epn1	11.571	14.636	10.515	12.568	10.548	10.788	13.784	14.122	6.745	14.423	10.29	7.145	29.633	35.717	33.815	31.236	32.382	31.572	30.865	35.603	33.549	35.572	34.569	31.82	10.6822	26.4439	30.98	15.7664	7.48738	4.46656	6.29963	39.0386	49.6449	20.4946	23.4715	14.1072	13.2209	60.9685	75.7453
Koike_CLKBMAL1_P0881	AR_G173	3_AR173	TSS	3.41847	87.7181	2.57898	25.6185	1.46467	6.86195	Tbccd1	7.672	7.126	6.461	6.064	7.207	7.563	9.714	5.102	8.876	6.336	3.197	7.025	4.584	5.065	5.446	6.619	4.614	4.693	4.324	4.901	5.253	6.073	4.311	5.414	12.5554	28.6476	22.8273	10.8112	6.59114	8.1887	2.86347	86.2671	68.1605	68.7786	30.1777	15.3506	29.0861	78.3881	70.9251
Koike_CLKBMAL1_P0884	AR_G174	3_AR174	intron	8.84826	44.8515	6.08352	24.6401	7.1816	22.1969	Clk4	16.321	18.586	23.098	18.432	15.566	20.269	25.655	18.249	44.444	21.112	18.363	26.265	5.217	7.391	5.87	6.428	4.873	5.475	6.595	5.819	5.612	6.5	7.631	7.431	19.6874	14.3238	20.8509	21.718	13.8918	11.8432	5.95254	15.0148	30.5507	59.3129	43.59	12.6248	26.4419	0	7.57453
Koike_CLKBMAL1_P0886	AR_G175	3_AR175	intron	3.38651	48.2953	2.76756	34.3872	15.1243	37.9712	Snd1	44.474	29.215	34.433	58.555	48.949	34.051	41.273	22.696	30.089	42.277	35.363	34.28	20.887	18.573	16.073	17.192	16.58	17.027	20.774	17.416	18.562	21.01	21.479	19.396	22.9867	31.9531	17.1946	16.2168	14.1719	16.5804	3.43616	42.0415	38.1884	20.0604	20.1184	11.0467	7.93257	60.9685	37.8726
Koike_CLKBMAL1_P0888	AR_G176	3_AR176	5' UTR	2.04997	38.8594	2.84037	23.3258	20.0445	10.923	Pcsk9	7.457	7.153	9.368	4.794	15.112	22.531	14.81	8.724	11.176	13.45	4.548	11.953	6.011	14.055	8.226	8.565	7.361	10.664	9.4	14.669	8.893	12.348	11.884	12.998	5.02544	37.4622	20.9745	19.2609	5.54552	7.28636	3.43616	52.5064	30.5507	25.792	6.70615	9.13384	16.2658	17.4196	39.0203
Koike_CLKBMAL1_P0891	AR_G177	3_AR177	intron	6.25397	51.9824	6.74183	17.9928	11.7925	14.1194	Ctnnb1	10.999	13.063	14.984	14.458	12.127	14.532	15.031	13.941	13.969	17.298	13.286	15.744	55.259	43.964	44.599	48.014	46.09	52.979	56.731	45.443	41.314	48.116	46.929	48.974	23.4912	10.3839	25.2484	17.1041	10.4749	11.1213	4.00886	24.0237	42.0073	37.2551	26.8246	16.1636	21.1535	11.3491	7.57453
Koike_CLKBMAL1_P0892	AR_G178	3_AR178	intergenic-10kbless	3.68584	69.028	2.44958	32.3249	4.08522	21.7142	Id2	18.584	23.986	22.64	7.186	18.956	20.94	17.999	38.983	36.319	17.404	12.679	24.895	106.408	48.2	36.884	40.61	75.699	53.274	95.806	73.121	46.549	39.824	77.553	59.23	0.420018	34.7911	28.5342	13.514	6.83387	10.1738	3.1932	48.0475	49.6449	45.8524	20.1184	14.3463	31.7303	17.4196	28.9209
Koike_CLKBMAL1_P0906	AR_G179	3_AR179	intergenic-10kbless	6.43855	30.275	5.01864	16.3512	6.77554	8.98391	Ndufa6	6.575	10.615	8.601	9.795	7.38	12.164	9.111	8.495	10.052	8.837	8.129	8.054	115.421	138.288	116.847	135.514	109.277	121.628	113.296	142.237	127.056	88.377	113.009	87.058	7.2392	13.222	23.6426	16.1622	11.091	8.1887	2.81141	30.0297	34.3696	52.4524	24.386	11.4293	13.2209	43.5489	38.5612
Koike_CLKBMAL1_P0911	AR_G180	3_AR180	intron	6.77664	63.7319	5.14882	27.5963	5.71805	16.0417	Gbe1	17.822	13.525	18.89	5.037	5.26	14.594	16.861	6.928	57.51	7.324	10.3	18.449	14.78	36.798	29.835	30.016	33.891	23.586	14.079	40.103	45.848	20.709	21.542	16.582	10.023	17.6293	17.1205	19.998	6.77785	7.44427	1.14539	42.0415	22.913	54.4497	36.8838	3.1562	2.64419	26.1294	39.0203
Koike_CLKBMAL1_P0937	AR_G181	3_AR181	TSS	6.43215	44.5533	3.96711	22.3389	21.4684	213.884	Ahsg	155.784	200.485	128.077	265.554	192.566	237.088	226.941	303.099	151.347	272.356	107.099	326.211	3296.66	1921.44	2556	2899.94	2046.48	2306.82	3139.59	1922.97	1678.52	2889.74	2574.93	2696.5	21.7092	20.9348	22.8273	16.6673	10.2881	4.46656	4.42536	39.0386	43.6274	45.8524	50.2961	14.2029	21.1535	69.6784	37.8726
Koike_CLKBMAL1_P0939	AR_G182	3_AR182	TSS	3.64456	36.459	6.83742	26.0434	6.4027	17.6059	Cfh	26.565	9.552	10.431	5.087	15.384	10.589	15.857	11.927	50.798	7.102	32.752	15.226	169.046	103.084	96.783	105.053	115.36	98.822	153.028	111.239	100.121	100.589	146.818	150.683	23.5857	15.4256	28.5342	23.4243	15.8897	15.4074	6.29963	45.6815	49.6449	30.742	23.4715	7.89049	19.3106	17.4196	22.7236
Koike_CLKBMAL1_P0941	AR_G183	3_AR183	TSS	5.02934	40.0924	2.45885	23.2202	1.82699	3.5447	Dnajb9	5.293	2.027	3.694	2.155	4.48	2.336	5.124	2.548	6.634	2.306	1.389	4.55	28.27	27.396	28.054	37.114	21.788	21.608	28.971	29.701	32.807	41.819	16.754	32.756	10.3885	26.4439	25.1743	6.75701	4.92935	5.95542	1.71808	21.4758	44.3217	35.8656	16.7654	2.53452	10.5768	55.9538	15.1491
Koike_CLKBMAL1_P0942	AR_G184	3_AR184	TSS	4.91529	53.7357	2.98324	23.8472	3.06773	13.8776	Slc23a1	13.647	18.234	14.653	15.341	12.873	17.433	13.62	12.538	13.523	12.401	8.908	13.359	15.952	15.816	12.889	15.25	11.713	16.143	14.351	12.236	17.667	12.392	12.324	11.988	5.881	27.5457	25.5202	13.9645	5.4895	11.1664	5.39721	36.0356	50.3393	42.8998	23.4715	14.2029	5.28838	17.4196	68.1707
Koike_CLKBMAL1_P0948	AR_G185	3_AR185	TTS	6.58722	35.0267	5.00292	16.3434	1.74293	7.98278	Bcat2	5.953	8.421	8.063	7.073	10.072	8.225	10.328	11.722	4.518	9.553	3.927	7.939	3.513	4.425	2.195	3.033	3.231	3.429	2.847	3.8	2.17	2.307	4.242	3.873	23.7701	14.424	25.3719	15.4934	13.9665	2.23328	2.29078	36.0356	37.8412	40.1209	33.5307	19.0806	28.8457	94.488	8.03359
Koike_CLKBMAL1_P0950	AR_G186	3_AR186	intron	5.09723	113.128	5.04976	30.55	6.91431	31.592	Reep6	29.948	32.849	47.685	33.495	19.07	32.63	39.689	25.06	36.374	42.61	17.773	21.922	190.659	280.622	239.663	237.835	280.944	223.359	208.2	310.84	337.118	253.141	255.128	193.557	10.5169	20.9348	26.9036	22.9738	16.2444	7.44427	8.01771	68.6133	109.011	85.9733	46.943	28.4058	21.1535	113.227	53.0217
Koike_CLKBMAL1_P0953	AR_G187	3_AR187	intron	3.86197	27.4376	3.59131	20.5172	3.34524	9.66262	Papola	9.686	9.58	9.935	9.3	10.757	9.895	10.167	10.723	10.474	8.833	7.04	9.562	5.615	4.135	4.245	4.875	4.5	4.822	5.264	4.566	3.925	4.154	4.542	5.116	23.6354	18.4974	28.5095	11.2617	6.77785	4.46656	3.43616	12.0119	34.3696	20.0604	20.1184	12.577	26.4419	95.8077	98.4687
Koike_CLKBMAL1_P0973	AR_G188	3_AR188	TSS	3.66028	44.2451	2.49277	21.9041	4.41405	4.2085	Gnl3	4.804	3.833	3.789	1.999	4.593	3.076	5.159	3.874	6.873	4.628	3.959	3.916	6.808	7.697	8.121	6.368	7.021	5.845	7.742	7.911	6.198	5.655	6.154	5.888	6.03911	30.8512	13.6124	12.6131	4.92935	5.21099	1.02391	33.0326	34.3696	28.3104	13.4123	8.46435	10.5768	17.4196	30.2981
Koike_CLKBMAL1_P0975	AR_G189	3_AR189	TSS	8.21415	71.6245	5.53663	24.724	14.5418	8.48824	Ifrd1	7.976	7.067	7.038	9.486	6.633	8.205	8.543	4.404	11.772	10.278	9.631	10.825	3.276	3.454	4.13	3.782	3.532	2.946	3.511	3.273	3.625	2.873	3.379	3.421	10.1398	16.0266	25.5449	22.3459	12.9769	5.52681	5.03276	35.8536	22.913	77.376	40.2369	17.3591	26.4419	65.7193	90.8943
Koike_CLKBMAL1_P0978	AR_G190	3_AR190	intron	6.50062	53.4502	5.97192	25.1081	14.2459	5.8139	Dusp3	4.842	5.143	7.032	8.354	7.196	6.427	5.384	4.4	3.908	5.76	6.485	4.836	8.443	8.001	9.888	10.017	11.602	7.387	9.09	10.17	11.464	9.18	8.866	8.525	12.2536	9.91647	22.0121	16.8584	12.3234	2.23328	3.05437	15.0148	40.04	45.8524	23.4715	6.31239	13.2209	8.70978	15.1491
Koike_CLKBMAL1_P0986	AR_G191	3_AR191	intron	6.28392	46.2936	4.01224	22.2795	10.6808	4.31734	Hook2	2.795	4.502	5.872	5.171	3.152	2.539	4.07	3.989	3.196	8.151	5.553	2.817	1.998	3.975	2.858	2.309	2.611	2.361	2.132	4.134	2.532	2.341	2.866	2.381	7.37105	22.0366	19.4675	19.2882	3.69701	4.46656	1.38835	30.0297	22.913	45.8524	26.8246	6.31239	2.64419	17.4196	0
Koike_CLKBMAL1_P0987	AR_G192	3_AR192	intron	3.45327	48.705	3.66555	18.7304	3.16588	5.22399	Tbc1d9b	5.353	5.512	5.44	5.46	5.363	5.352	6.066	6.736	4.472	4.633	4.143	4.158	9.277	11.186	9.851	9.021	9.339	8.896	9.395	10.435	10.152	8.933	9.099	9.234	6.83935	17.6293	23.4697	12.6131	6.77785	6.69985	5.83106	36.0356	38.1884	25.792	26.8246	14.2029	26.8425	34.8392	0
Koike_CLKBMAL1_P0990	AR_G193	3_AR193	intron	4.18488	64.7877	3.04548	29.0419	4.38471	6.49003	Tm4sf4	2.5	9.204	7.166	5.698	7.92	7.778	6.803	9.171	7.057	5.391	1.81	7.381	22.399	28.247	25.574	33.253	23.885	30.973	23.893	30.467	23.963	25.616	23.226	25.009	10.5666	28.6476	25.2731	17.0359	8.62636	8.93313	3.52293	51.0504	57.2826	45.8524	20.1184	12.3857	10.5768	79.9717	68.1708
Koike_CLKBMAL1_P0993	AR_G194	3_AR194	intron	7.41687	71.7172	6.05656	30.9903	10.4694	10.4341	Osbpl1a	9.369	8.77	10.449	14.431	7.218	9.235	8.82	9.261	14.641	12.168	11.394	9.452	9.994	13.488	13.274	10.312	11.437	10.478	9.635	12.888	12.478	9.602	10.464	9.307	8.43362	25.3421	16.2064	23.8611	16.1884	11.595	5.70958	25.7527	45.8261	73.4681	46.943	7.89049	13.2209	23.754	30.2981
Koike_CLKBMAL1_P0994	AR_G195	3_AR195	intron	4.27723	11.2101	3.23761	11.984	5.02185	4.89908	Nmd3	4.725	4.443	5.437	4.104	3.331	4.863	5.518	4.055	8.68	3.911	3.98	5.742	5.444	5.762	7.89	6.34	6.199	5.621	7.287	6.396	6.041	5.716	5.158	6.641	7.57146	25.3755	30.9305	13.2547	5.3588	2.97771	2.86347	18.0178	40.3871	14.3289	13.4123	0	2.64419	26.1294	15.1491
Koike_CLKBMAL1_P0996	AR_G196	3_AR196	exon	8.84558	50.9152	5.07235	21.9516	5.15014	4.50603	2810055F11Rik	4.404	4.388	6.758	3.79	2.678	4.329	4.933	4.767	7.021	3.723	2.284	4.997	3.96	7.81	4.93	3.878	5.174	3.749	5.358	5.884	8.401	2.478	4.279	2.221	7.47043	16.5274	18.5287	20.312	6.23637	5.21099	0.919781	3.00297	38.1884	42.9866	47.1463	7.89049	5.28838	52.2588	30.2981
Koike_CLKBMAL1_P1004	AR_G197	3_AR197	intron	3.67551	51.2646	6.06041	27.4626	1.47616	7.22252	Zfp507	6.991	7.479	6.397	6.137	7.009	8.259	8.256	9.015	7.512	6.787	5.742	7.085	2.376	2.272	2.938	2.298	2.781	2.7	2.847	2.366	2.711	2.342	2.669	2.917	20.8937	19.8329	16.2311	20.7215	14.788	8.93313	2.86347	46.7735	34.3696	29.2657	30.1777	11.0467	19.0702	104.517	53.0217
Koike_CLKBMAL1_P1007	AR_G198	3_AR198	intron	2.18761	52.5662	4.78984	30.5943	9.85975	41.4414	Phyh	22.636	42.97	46.52	84.795	22.007	31.28	38.96	47.177	40.906	51.278	42.54	26.227	690.359	604.042	728.639	661.542	675.531	623.535	621.181	650.163	671.613	716.304	607.046	637.869	11.8303	22.0366	22.6297	19.452	13.5557	8.00823	1.71808	44.2255	43.6274	22.9262	26.8246	23.7193	21.1535	8.7098	30.2981
Koike_CLKBMAL1_P1008	AR_G199	3_AR199	TSS	6.21409	51.1497	3.67789	18.7557	11.2926	8.8799	Mxd4	8.976	9.671	8.479	11.381	9.136	8.398	8.808	8.433	7.497	10.166	9.043	6.572	15.986	20.233	18.298	19.606	20.06	21.051	19.751	18.71	17.456	18.19	17.863	16.631	17.5569	18.6309	25.2731	12.0261	6.16169	5.21099	2.29078	37.5826	30.5507	37.2551	43.59	18.9372	21.1535	60.9685	60.5962
Koike_CLKBMAL1_P1015	AR_G200	3_AR200	TSS	5.6236	53.5447	4.07105	25.5799	0.237945	5.34208	2310039H08Rik	5.801	4.543	7.449	4.045	6.421	6.521	6.304	5.377	4.361	4.737	3.341	5.205	13.509	19.162	18.159	16.386	20.101	14.58	18.101	20.419	18.446	14.272	18.93	15.845	9.18175	16.5274	24.4579	14.8654	5.54552	6.69985	2.29078	31.5767	38.0727	40.1209	20.1184	15.781	13.2209	27.449	15.1491
Koike_CLKBMAL1_P1017	AR_G201	3_AR201	intron	4.29525	32.4747	4.7165	13.2464	12.3456	12.5573	Ell	9.876	13.265	13.281	13.05	15.712	10.23	12.083	14.875	8.194	15.592	14.344	10.185	6.906	8.416	7.159	6.168	5.921	5.862	5.667	6.428	5.322	5.587	6.384	5.887	5.91417	18.7311	17.9358	16.2168	12.3234	4.73726	2.86347	42.0415	26.7319	34.3893	23.4715	15.781	20.2721	8.7098	60.5962
Koike_CLKBMAL1_P1030	AR_G202	3_AR202	intron	5.70877	38.4394	2.82158	16.0817	13.1708	14.7881	Igfbp1	3.013	2.9	8.86	59.775	3.854	7.854	6.967	25.83	7.642	4.666	11.1	34.995	2.832	3.658	5.352	3.163	6.098	3.139	4.339	3.466	17.41	8.23	13.068	13.358	15.3672	20.9348	15.49	14.7835	6.6845	8.93313	5.15424	37.4006	28.2363	22.9262	41.6594	19.7501	18.5093	60.9686	30.2981
Koike_CLKBMAL1_P1031	AR_G203	3_AR203	intergenic-10kbless	8.15978	38.3491	4.80327	17.8452	7.37139	8.59392	Mgat1	7.439	10.459	8.582	9.721	8.771	9.785	7.698	10.441	5.665	9.678	7.569	7.319	20.103	16.934	17.395	19.44	19.517	21.019	20.118	19.688	17.623	18.034	19.917	20.482	21.9768	17.6293	21.0486	12.5721	11.7072	5.75239	2.49903	21.0208	27.1948	31.5235	33.5307	7.89049	7.93257	36.9506	22.7236
Koike_CLKBMAL1_P1036	AR_G204	3_AR204	intron	10.1522	55.3217	6.71434	16.9078	20.7654	18.6217	Mocs2	12.932	15.524	15.97	15.952	17.017	23.239	22.879	15.171	27.291	21.603	11.354	24.529	44.002	53.216	56.037	58.12	58.048	61.437	40.676	50.304	54.642	52.553	51.632	56.359	15.6171	11.0183	15.91	25.349	10.4749	7.44427	5.51869	45.0445	42.0073	28.6578	57.0023	28.3101	18.5093	60.9686	75.7452
Koike_CLKBMAL1_P1037	AR_G205	3_AR205	intron	7.82595	64.7461	6.84291	36.9757	15.0732	29.155	Dmgdh	17.348	18.607	20.989	57.905	22.417	51.833	21.094	16.052	21.968	40.976	28.217	32.455	91.064	142.386	141.32	128.428	148.124	142.152	99.212	129.105	142.69	128.821	120.673	113.349	12.754	17.6293	24.4579	24.3252	20.9497	10.0385	4.00886	26.5717	38.1884	34.3893	46.943	14.2029	29.0861	52.2588	45.4472
Koike_CLKBMAL1_P1039	AR_G206	3_AR206	intergenic-10kbless	8.41486	64.0711	6.09638	16.6602	6.59967	48.2177	Proz	43.78	39.152	48.884	56.731	52.242	43.341	54.802	69.319	44.113	48.548	39.303	38.396	109.172	86.595	104.8	102.811	97.733	99.583	113.817	94.965	89.918	108.76	104.378	116.625	21.2055	12.7545	17.8864	13.7597	14.1719	6.65473	4.58155	33.0326	34.3696	48.805	58.0183	12.6726	29.0861	26.1294	39.9384
Koike_CLKBMAL1_P1046	AR_G207	3_AR207	intergenic-10kbless	5.46008	43.5481	7.17134	33.6141	12.3798	6.08059	Nt5c2	4.16	6.306	5.454	6.555	4.676	6.023	6.121	5.006	6.043	9.922	5.866	6.835	1.976	2.946	2.704	3.332	3.038	2.568	2.626	3.197	2.806	2.427	2.733	2.479	11.9319	19.8329	22.0121	21.9228	23.6571	11.9108	2.29078	30.0297	49.6449	37.2551	30.1777	9.46859	7.93257	26.1294	15.1491
Koike_CLKBMAL1_P1049	AR_G208	3_AR208	intergenic-10kbless	5.22046	61.6055	4.13426	21.7402	2.94629	4.50565	Tbl1x	4.052	4.589	3.866	3.761	3.176	4.824	5.821	5.928	6.154	3.523	4.139	4.234	8.256	9.068	7.383	7.431	7.526	7.975	7.939	8.401	7.818	7.945	6.73	8.43	3.99234	18.7311	19.5663	14.415	8.62636	6.69985	2.56844	42.0415	30.5507	48.7182	26.8246	6.31239	15.8651	69.6783	30.2981
Koike_CLKBMAL1_P1051	AR_G209	3_AR209	intergenic-10kbless	7.48748	39.0981	3.95099	17.5162	12.0048	7.72797	Stbd1	3.43	6.245	11.342	8.159	9.767	9.963	5.832	4.288	9.147	13.249	2.975	8.338	16.609	38.43	25.259	37.194	31.739	25.296	23.015	45.739	29.803	33.43	23.476	27.549	10.21	18.7311	20.5545	16.2168	8.81308	5.95542	5.15424	27.0267	42.0073	40.1209	52.8363	12.6248	15.0639	34.8392	68.1707
Koike_CLKBMAL1_P1054	AR_G210	3_AR210	intron	3.56332	43.0841	4.40985	19.6454	18.6206	57.6172	Hsp90b1	71.797	34.979	35.487	33.351	156.579	52.454	86.677	27.546	67.831	47.609	26.529	50.568	237.643	168.066	161.672	208.207	163.985	218.282	240.454	166.636	181.253	286.284	224.002	310.991	20.9055	11.0183	22.5803	15.3159	6.16169	3.72214	5.57075	33.0326	42.0073	28.6578	20.1184	12.6248	18.5093	8.7098	7.57453
Koike_CLKBMAL1_P1060	AR_G211	3_AR211	TSS	4.61335	59.5234	3.73903	24.5968	12.9643	4.22167	Wbp2	4.416	3.799	4.447	6.001	4.478	3.924	3.932	3.626	3.586	4.395	4.76	3.297	34.82	39.793	36.236	36.441	34.411	33.097	29.857	38.452	39.159	31.078	34.451	39.691	7.79933	23.1384	26.6813	15.78	7.39402	7.44427	0.572694	45.0445	53.4638	25.792	40.2369	7.89049	7.93257	26.1294	45.4472
Koike_CLKBMAL1_P1061	AR_G212	3_AR212	TSS	1.5819	27.6623	5.0187	19.7631	2.87644	5.23168	Tgif1	4.822	5.819	5.202	5.614	4.77	5.28	5.847	6.949	4.458	5.041	3.172	5.807	4.58	5.846	3.697	3.097	4.441	5.675	4.343	4.074	4.015	4.392	5.12	5.027	23.5839	15.5592	33.1046	21.5542	7.39402	7.12846	4.04357	47.5925	26.7319	22.9262	20.1184	7.89049	13.2209	156.776	53.0217
Koike_CLKBMAL1_P1067	AR_G213	3_AR213	3' UTR	2.73746	45.7728	3.18277	22.3016	5.2672	21.5646	Dhdh	16.692	28.164	25.633	26.415	16.227	20.402	23.632	35.015	17.175	20.176	13.881	15.364	40.186	59.731	53.353	44.789	55.116	52.801	41.347	57.687	55.744	39.719	49.078	40.643	8.63401	26.4439	26.0637	14.8654	4.92935	2.32352	3.43616	36.0356	42.0073	17.1947	16.7654	11.0467	17.1472	78.3881	45.4471
Koike_CLKBMAL1_P1069	AR_G214	3_AR214	intron	3.40854	30.3252	2.24526	26.251	6.75465	9.03314	Tmem183a	6.541	8.974	11.182	8.624	6.177	9.193	6.995	13.594	11.675	9.733	6.884	8.825	28.175	28.568	26.813	26.816	28.866	26.248	23.836	27.155	26.874	25.213	28.751	27.665	18.3404	45.175	35.2539	15.4797	8.47699	7.17357	6.71614	36.0356	38.1884	28.6578	20.1184	3.1562	15.8651	130.647	113.618
Koike_CLKBMAL1_P1078	AR_G215	3_AR215	intron	4.66297	58.136	3.96879	31.9698	1.90069	6.87957	Enpep	9.022	7.339	6.117	2.793	6.044	7.561	8.222	5.864	12.913	3.257	7.452	5.971	9.851	17.167	12.416	13.114	15.42	12.687	9.331	18.095	19.853	11.472	15.77	14.427	10.4434	23.2386	33.401	16.6673	14.2466	7.62474	5.81371	48.0475	30.5507	36.6472	33.5307	12.6248	18.5093	87.0979	37.8726
Koike_CLKBMAL1_P1084	AR_G216	3_AR216	exon	7.58914	24.675	5.56349	18.1217	13.8966	6.71918	Hes6	6.713	6.969	5.153	5.565	8.625	8.911	5.057	2.891	4.526	17.897	2.803	5.519	31.217	32.974	34.959	36.71	20.416	26.893	34.052	28.903	26.965	43.802	25.199	31.736	9.82316	11.0183	21.1968	13.514	11.3898	2.97771	2.23871	12.0119	15.2754	33.3472	16.7654	3.1562	5.28838	17.4196	7.57453
Koike_CLKBMAL1_P1085	AR_G217	3_AR217	intron	2.43284	29.4565	3.3523	20.6127	3.5031	60.822	Col18a1	45.595	70.409	48.198	77.058	67.272	69.969	68.997	86.615	29.381	80.011	34.474	51.885	84.294	94.729	76.421	79.559	81.917	93.877	85.69	87.942	71.676	84.292	92.413	92.487	23.2426	21.4356	24.0873	10.2515	7.39402	2.97771	2.86347	33.0326	15.2754	25.3578	6.70615	7.89049	7.93257	8.7098	30.2981
Koike_CLKBMAL1_P1092	AR_G218	3_AR218	exon	8.18218	56.3701	4.63688	23.9754	13.1126	13.2079	Txndc5	11.412	9.791	14.569	15.527	19.853	13.211	12.975	9.878	10.195	23.399	6.679	11.006	40.205	41.76	40.497	44.794	37.329	38.981	42.383	45.356	44.378	58.613	40.282	54.478	13.7416	19.8329	22.8273	20.1345	7.76746	6.81264	4.00886	27.0267	11.4565	54.4497	40.2369	3.1562	15.8651	8.70978	7.57453
Koike_CLKBMAL1_P1095	AR_G219	3_AR219	TSS	7.94517	48.5747	3.24551	25.9026	15.3022	6.46437	Serf2	6.77	5.501	7.909	6.844	9.454	7.542	6.956	4.933	6.011	6.444	3.711	5.498	6.013	6.802	6.708	7.404	7.254	7.277	5.918	7.087	6.456	7.808	7.231	7.861	16.7101	25.7094	23.5932	19.7387	8.01019	9.36174	4.58155	12.0119	39.8085	60.1813	30.1777	12.6248	17.1472	86.3061	45.4472
Koike_CLKBMAL1_P1108	AR_G220	3_AR220	intron	9.26757	46.6441	4.38305	17.4233	14.4189	7.92267	Dap	7.595	4.839	5.902	15.26	11.821	7.343	7.499	7.077	5.051	8.235	9.742	4.708	142.224	78.489	112.131	102.248	105.641	108.937	120.309	85.54	95.391	85.949	108.083	132.926	22.8325	25.3421	8.32555	18.8241	13.5557	5.21099	2.49903	18.0178	38.1884	40.1209	57.0023	18.0764	26.4419	34.8392	53.0217
Koike_CLKBMAL1_P1115	AR_G221	3_AR221	intron	3.51996	27.528	2.68313	28.593	2.15258	3.30866	Rell1	3.575	3.757	3.591	3.213	3.132	3.547	3.121	6.192	1.637	2.313	2.613	3.012	4.217	3.006	2.18	2.658	2.95	2.872	3.72	2.527	2.852	3.006	3.125	3.116	0.15904	37.2953	30.0659	15.3841	5.30278	1.48885	0.572694	22.2948	38.1884	14.3289	6.70615	4.35173	7.93257	3.1672	0
Koike_CLKBMAL1_P1116	AR_G222	3_AR222	TSS	10.0614	37.5021	3.98295	31.875	11.5251	41.2392	Slc17a2	23.445	38.818	37.241	37.171	31.525	26.148	32.007	46.632	55.538	51.867	59.423	55.055	42.103	39.874	43.712	46.403	48.749	43.502	44.682	40.02	36.433	49.741	49.625	50.774	18.5191	23.1384	26.1872	13.7051	12.9395	8.1887	4.00886	15.0148	22.913	11.4631	36.8838	12.6248	7.93257	26.1294	30.2981
Koike_CLKBMAL1_P1138	AR_G223	3_AR223	intron	6.64724	38.4309	6.36025	27.5997	20.152	9.26184	Edf1	11.03	6.618	10.514	9.348	9.185	10.942	9.3	10.49	6.102	12.381	6.447	8.786	69.329	64.531	65.679	73.466	68.026	67.881	69.964	74.624	76.333	72.207	66.061	69.912	10.4346	12.1201	24.9767	17.5682	13.9852	10.9183	5.08483	9.0089	38.1884	31.5235	22.049	4.73429	10.5768	8.7098	15.1491
Koike_CLKBMAL1_P1141	AR_G224	3_AR224	intron	2.79127	28.0312	4.86348	14.8678	10.8171	10.502	Klf9	9.205	9.536	13.225	18.873	7.228	9.791	8.992	9.545	8.786	11.509	10.127	9.206	22.502	13.819	14.756	8.655	14.621	10.031	17.513	14.877	19.846	8.88	14.468	9.158	4.78293	15.3254	28.9047	21.3221	5.26544	4.46656	1.14539	38.1286	38.1884	17.1947	6.70615	9.46859	7.93257	17.4196	45.4471
Koike_CLKBMAL1_P1143	AR_G225	3_AR225	intron	5.28848	71.2776	4.56872	27.6801	13.6977	9.3136	Tbc1d24	6.683	8.703	9.743	10.519	14.446	8.268	10.468	5.351	8.368	13.208	8.227	7.778	1.906	3.121	2.345	2.739	2.154	2.553	3.575	3.032	2.507	3.048	2.344	2.835	5.38871	22.1701	21.1968	16.2168	10.6242	10.3994	2.29078	39.0386	56.2411	51.584	26.8246	12.6248	13.2209	8.7098	15.1491
Koike_CLKBMAL1_P1147	AR_G226	3_AR226	intron	7.10728	61.115	5.25775	27.6534	5.7778	7.88942	Decr1	7.449	9.01	13.348	4.847	4.329	7.456	7.459	6.642	13.548	6.141	6.261	8.184	29.612	58.399	52.56	49.309	54.3	46.933	34.535	58.624	64.151	46.732	38.044	36.699	10.3876	22.0366	17.9111	21.5132	14.788	4.46656	2.86347	30.0297	34.3696	48.7182	43.59	1.5781	24.9996	43.549	37.8726
Koike_CLKBMAL1_P1154	AR_G227	3_AR227	TSS	4.32244	54.9457	2.85228	19.0116	18.3141	12.3385	Ddit3	14.989	12.656	9.23	9.483	19.233	11.881	14.773	8.539	9.667	18.862	7.567	11.182	3.759	6.827	3.667	5.335	5.385	5.298	4.08	5.489	3.889	8.094	3.619	7.047	16.6481	19.1318	18.751	10.8112	3.08084	4.46656	3.41881	33.0326	42.0073	28.6578	36.8838	14.2029	21.3939	69.6783	60.5962
Koike_CLKBMAL1_P1155	AR_G228	3_AR228	intron	5.72486	31.5923	5.17667	16.7423	9.1919	13.3924	Ehmt1	11.774	15.654	13.276	14.007	12.434	12.289	14.624	12.445	12.62	16.915	13.247	11.424	2.672	2.515	2.588	2.785	3.064	2.82	2.541	2.774	3.242	2.94	3.173	2.294	14.5668	11.5525	18.751	12.1626	9.24253	5.95542	4.47742	24.0237	22.913	31.5235	13.4123	7.89049	10.5768	8.70978	32.3639
Koike_CLKBMAL1_P1156	AR_G229	3_AR229	intron	8.30401	38.6537	3.39081	21.8703	18.9429	8.39313	Ctsb	7.581	7.496	9.105	9.029	10.331	13.175	8.089	7.534	6.748	7.21	6.114	8.304	87.413	87.364	86.981	78.867	80.947	78.42	83.352	93.077	87.799	72.887	81.44	85.549	5.18953	25.7761	19.1957	11.1661	11.5952	4.37633	1.71808	15.0148	19.0942	45.8524	36.8838	6.31239	10.5768	26.1294	15.1491
Koike_CLKBMAL1_P1158	AR_G230	3_AR230	TSS	5.24624	49.7823	1.95392	12.7512	23.947	12.3372	Pten	11.176	11.446	11.356	9.63	10.115	15.212	14.118	12.018	16.059	11.221	8.814	16.883	15.237	17.551	16.187	17.122	16.434	17.579	14.787	17.494	15.553	15.702	16.253	17.239	19.5005	26.4439	21.8144	15.9848	5.6202	6.69985	3.45352	45.3175	70.9379	53.234	58.8312	10.8554	26.4419	52.2588	8.03359
Koike_CLKBMAL1_P1165	AR_G231	3_AR231	intergenic-10kbless	6.37727	39.4065	4.25394	21.4685	11.9482	6.55908	Cbx4	6.96	9.012	5.609	9.55	8.848	6.134	5.779	5.648	3.18	9.611	4.966	3.413	5.857	6.611	4.341	4.173	4.59	5.591	3.597	5.29	4.744	4.461	4.72	4.263	4.15056	18.7311	18.751	20.7215	8.04753	6.69985	3.27997	27.0267	34.3696	37.2551	23.4715	15.4462	13.2209	23.49	45.4472
Koike_CLKBMAL1_P1166	AR_G232	3_AR232	intron	8.04121	52.7535	4.68559	16.6825	13.2836	39.6409	Hpn	34.955	37.546	38.709	47.737	44.944	42.06	41.256	39.388	28.616	52.122	41.422	26.936	102.745	93.721	95.644	90.349	88.088	85.22	92.2	97.225	91.912	96.675	97.405	94.606	5.95242	20.2002	7.33736	10.9477	11.1844	5.88774	1.80485	27.0267	25.8061	51.584	40.0337	12.6248	16.0254	17.4196	15.1491
Koike_CLKBMAL1_P1167	AR_G233	3_AR233	TSS	8.0702	69.3443	4.74533	22.5573	10.6077	8.25042	Sorbs3	3.581	7.766	6.974	19.841	4.757	6.425	5.319	14.889	2.628	13.494	7.171	6.158	3.458	3.401	3.909	4.278	3.152	2.232	3.058	3.072	2.772	4.132	4.083	2.372	12.7355	20.9348	15.9594	17.8822	13.313	9.63244	2.29078	27.0267	42.0073	74.5102	43.59	17.3591	22.5157	60.9685	30.2981
Koike_CLKBMAL1_P1174	AR_G234	3_AR234	TSS	7.63241	44.041	5.24087	22.1073	4.19009	10.4603	Atg3	7.312	11.895	10.546	7.453	7.976	10.165	11.689	12.573	15.331	9.398	8.239	12.946	7.526	11.76	11.115	11.97	13.001	11.014	7.724	12.899	13.45	10.468	11.036	8.745	12.209	12.7545	26.286	14.8654	10.5496	3.72214	1.71808	18.0178	26.7319	37.2551	30.1777	9.46859	1.44229	76.5406	22.7236
Koike_CLKBMAL1_P1177	AR_G235	3_AR235	intron	2.57777	31.7999	4.2131	25.5368	2.25645	6.09223	Zfand5	4.849	6.923	6.986	4.632	4.072	7.565	7.505	5.69	7.842	5.179	4.026	7.838	11.289	16.632	10.991	13.604	16.473	17.857	11.891	17.433	12.852	11.755	18.17	15.792	21.0101	23.1384	17.1205	22.1958	13.1823	6.67729	4.00886	37.1276	19.0942	20.0604	13.4123	12.6248	13.2209	43.5489	15.1491
Koike_CLKBMAL1_P1184	AR_G236	3_AR236	intron	3.68336	31.8033	4.68002	19.0435	8.34285	4.90207	Foxk1	4.166	5.701	5.857	6.822	4.574	3.815	4.692	5.831	4.146	4.766	4.742	3.715	2.989	3.786	3.118	2.821	3.057	2.721	2.915	4.076	2.996	2.778	3.083	3.048	6.06463	14.3238	21.1968	16.2168	3.08084	7.44427	2.5858	24.0237	26.7319	22.9262	13.4123	6.31239	7.93257	8.7098	7.57453
Koike_CLKBMAL1_P1211	AR_G237	3_AR237	intron	6.75438	64.4588	6.54967	25.0367	17.6047	212.325	Trf	136.531	181.844	143.342	126.423	409.165	209.404	179.503	210.693	118.731	327.764	121.584	382.915	4300.74	2239.38	2701.75	3310.37	2574.21	3065.33	3817.2	2355.31	2233.39	3249.53	3076.77	3363.08	22.588	16.1268	20.678	16.6673	16.6366	5.95542	4.23446	34.9436	45.8261	54.7971	33.5307	18.3633	15.8651	35.367	13.0833
Koike_CLKBMAL1_P1215	AR_G238	3_AR238	intergenic-10kbless	4.31533	39.3821	4.10142	17.5039	4.30296	57.8975	Gpam	45.255	55.108	50.101	15.83	36.624	95.006	91.102	40.233	178.901	39.137	7.611	39.861	19.014	94.595	32.646	33.635	43.092	50.447	21.503	84.84	104.344	42.571	35.29	34.099	8.32633	25.3421	21.098	21.6224	7.9355	5.95542	2.86347	45.0445	45.8261	34.3893	40.2369	11.9553	23.7977	33.7835	60.5962
Koike_CLKBMAL1_P1220	AR_G239	3_AR239	intron	8.3913	63.3776	8.37647	25.0593	7.8923	14.782	Trim11	14.196	17.727	18.974	16.506	16.692	12.599	14.125	15.272	13.687	16.561	11.07	9.977	4.085	4.239	3.815	4.188	3.126	3.031	4.373	4.448	3.84	3.964	4.491	2.727	8.15971	13.222	10.5984	16.7765	16.0204	10.422	2.86347	24.0237	26.7319	45.8524	46.943	9.46859	18.5093	26.1294	60.5962
Koike_CLKBMAL1_P1229	AR_G240	3_AR240	intron	6.52686	29.8206	3.36282	23.8089	2.83041	6.82971	Aatf	6.113	7.918	8.197	5.606	8.323	7.233	7.716	7.319	5.558	7.119	4.283	6.571	2.804	3.705	3.795	3.262	2.968	2.601	2.366	3.839	2.651	2.666	3.359	2.547	9.34224	20.4673	25.2731	12.6131	4.31318	3.72214	1.71808	12.0119	30.5507	14.3289	16.7654	6.31239	0	0	15.1491
Koike_CLKBMAL1_P1233	AR_G241	3_AR241	intergenic-10kbless	6.92615	54.4173	3.95543	23.043	14.1008	2.92806	Il17ra	1.976	2.968	2.629	3.863	3.192	1.942	2.984	2.371	1.797	3.341	6.486	1.587	3.873	2.839	3.258	3.325	3.406	3.145	3.748	3.303	2.479	3.176	3.235	3.667	23.0619	22.6376	16.3052	20.2028	5.54552	5.21099	2.29078	27.0267	42.0073	40.1209	46.943	6.31239	13.2209	26.1294	45.4472
Koike_CLKBMAL1_P1235	AR_G242	3_AR242	intron	2.01909	42.6673	3.3779	26.7664	7.18084	3.55057	Pdk1	2.924	2.989	6.156	2.532	2.621	4.535	3.108	2.132	6.781	2.994	1.874	3.961	4.653	20.482	17.385	14.692	17.733	16.709	5.157	21.39	22.771	14.934	14.25	10.11	11.1307	19.2653	28.3118	9.14585	8.58902	10.0836	2.89818	39.0386	26.7319	20.842	20.1184	7.89049	18.5093	17.4196	14.9195
Koike_CLKBMAL1_P1241	AR_G243	3_AR243	3' UTR	8.208	54.3009	6.62011	23.8547	6.8625	4.23592	Camk2n1	4.106	5.102	4.853	3.963	3.683	4.794	4.416	4.408	3.381	6.925	2.236	2.962	22.172	23.593	26.383	26.895	21.975	26.121	21.646	29.027	21.128	25.977	20.577	22.928	9.58357	6.61098	22.8273	18.8104	11.7072	5.95542	2.29078	27.0267	34.3696	22.9262	57.0023	6.31239	15.8651	43.5489	25.478
Koike_CLKBMAL1_P1242	AR_G244	3_AR244	TSS	5.86345	39.1526	4.34929	21.7099	8.55785	10.7891	Egln2	8.703	13.568	12.75	12.294	12.219	10.506	12.058	9.961	8.374	12.599	8.197	8.241	15.429	13.705	15.262	14.426	14.359	15.309	15.232	17.492	14.158	15.27	14.945	16.147	1.83862	17.7962	24.1614	15.4251	9.8587	8.1887	2.86347	34.2156	62.0272	24.4894	52.9379	14.2029	21.5542	26.1294	15.1491
Koike_CLKBMAL1_P1244	AR_G245	3_AR245	TSS	4.76607	38.5247	1.9031	20.6695	19.7531	3.02175	Mvd	3.06	1.525	2.267	1.932	5.509	8.226	4.34	1.589	2.018	2.652	1.123	2.286	4.167	9.04	2.429	6.851	3.582	9.247	3.808	5.87	5.363	13.987	5.49	7.455	15.7239	38.564	20.3815	8.09476	4.40654	5.21099	2.68993	27.0267	49.0663	31.5235	30.1777	20.5153	23.7977	58.0653	37.8727
Koike_CLKBMAL1_P1250	AR_G246	3_AR246	intron	0.724463	44.6078	6.80202	26.4179	23.7514	11.2691	Pkp4	11.339	12.817	12.193	9.471	9.623	12.153	11.851	10.597	10.066	10.843	11.794	12.484	7.041	8.896	7.536	10.324	8.719	9.04	7.084	8.789	8.41	8.427	7.664	8.271	14.0633	11.0183	17.3428	16.1213	11.5765	14.0764	4.58155	30.0297	19.0942	25.792	6.70615	11.0467	29.0861	43.549	30.2981
Koike_CLKBMAL1_P1256	AR_G247	3_AR247	intron	7.68554	32.3875	5.27313	24.6649	12.3384	12.0021	Jak1	8.724	11.465	10.815	12.599	10.334	11.115	12.311	13.156	11.277	16.255	13.736	12.237	17.427	15.794	14.431	19.091	16.708	17.093	16.862	16.24	14.154	17.166	15.91	17.83	20.5748	14.3238	22.0121	16.2168	9.24253	2.97771	3.05437	21.0208	7.63768	34.3893	23.4715	3.1562	2.64419	8.70978	30.2981
Koike_CLKBMAL1_P1258	AR_G248	3_AR248	intergenic-10kbless	6.90263	66.796	3.78079	20.2939	13.5952	8.58361	Ncoa3	7.877	7.651	7.807	10.067	7.322	8.935	10.795	8.973	6.995	10.852	8.428	7.301	3.778	2.936	4.284	4.147	3.587	4.028	4.17	3.621	3.486	4.819	4.2	3.681	16.0883	15.4256	14.6747	14.1692	4.31318	3.72214	3.43616	24.0237	45.8261	43.1603	43.59	15.781	41.3455	52.2588	45.4472
Koike_CLKBMAL1_P1268	AR_G249	3_AR249	intron	6.57696	39.2249	5.30325	18.9681	6.72937	11.3782	Brd4	9.659	13.392	10.348	12.923	10.72	10.914	12.219	13.243	10.207	13.214	9.708	9.991	5.931	5.68	5.153	5.041	5.417	5.987	6.215	5.316	4.341	5.203	6.2	5.404	23.2902	14.3238	18.7757	16.2168	12.006	5.95542	4.00886	12.0119	44.9003	17.1947	30.1777	4.73429	2.88457	8.70978	0
Koike_CLKBMAL1_P1270	AR_G250	3_AR250	intron	4.93663	29.8008	4.39518	21.4879	14.9888	13.146	Gstp1	8.506	11.257	7.979	15.916	18.506	14.263	11.127	12.637	4.273	30.455	5.325	17.507	863.209	202.894	171.19	283.836	198.874	336.283	757.441	115.485	123.422	358.75	273.659	432.386	0.296608	17.6293	17.9358	13.9645	9.24253	8.1887	1.00655	27.0267	26.7319	40.1209	13.4123	1.5781	10.5768	17.4196	15.1491
Koike_CLKBMAL1_P1274	AR_G251	3_AR251	intron	5.20842	51.4574	4.32559	26.5872	18.6249	6.99128	Aff1	7.379	7.007	6.274	7.209	6.805	7.06	7.777	7.117	5.549	7.597	8.397	5.724	4.575	3.554	4.313	4.196	4.55	4.613	5.133	4.065	3.76	4.021	4.479	4.438	22.1103	25.3421	23.5685	17.9914	12.6221	11.1664	1.71808	21.0208	34.3696	50.8024	20.1184	11.0467	23.7977	17.4196	53.0217
Koike_CLKBMAL1_P1278	AR_G252	3_AR252	TSS	3.72262	33.7632	2.7193	17.7946	15.3858	67.0505	Adk	52.174	52.412	58.331	67.197	39.29	91.569	65.844	53.564	94.343	73.996	77.412	78.474	82.137	98.804	103.071	107.656	110.643	110.001	77.947	99.992	98.129	93.257	96.362	90.838	14.5712	23.4389	17.9358	15.4387	3.52897	0.744427	3.85267	19.2918	38.8827	20.5815	10.0592	12.6248	13.2209	17.4196	7.57453
Koike_CLKBMAL1_P1279	AR_G253	3_AR253	intron	5.51137	48.5742	6.41672	25.0195	5.19017	4.13487	Sgms1	4.078	5.078	6.35	3.497	2.763	4.044	4.696	3.569	4.291	3.989	3.591	3.673	1.351	2.229	2.028	2.173	1.631	2.037	1.48	2.607	2.233	1.714	1.229	1.725	8.56172	14.3238	19.5663	18.9742	14.8814	7.44427	2.86347	27.0267	30.5507	31.5235	26.8246	9.51641	18.5093	34.8391	7.57453
Koike_CLKBMAL1_P1282	AR_G254	3_AR254	intergenic-10kbless	6.71202	30.1977	4.8252	22.8201	16.4301	11.6847	Usp10	10.224	12.813	9.909	14.579	11.894	12.933	14.209	9.631	8.373	15.314	8.984	11.353	15.643	16.078	14.168	16.627	16.88	15.968	18.874	17.444	16.943	16.812	15.652	15.252	3.67447	19.8329	16.3052	18.1416	12.9395	3.49655	2.86347	9.0089	22.913	28.6578	10.0592	9.46859	5.28838	8.70978	16.9853
Koike_CLKBMAL1_P1286	AR_G255	3_AR255	intron	7.44152	26.4578	5.6567	21.5506	6.65263	7.25228	AK168184	6.208	9.695	8.375	10.532	5.854	6.7	7.92	8.207	4.838	7.62	5.401	5.678	2.025	2.23	1.971	2.496	2.147	3.012	1.714	1.633	1.671	1.302	2.091	1.753	20.9099	9.91647	18.751	15.3159	8.62636	5.9103	2.9676	15.0148	19.0942	22.9262	16.7654	6.31239	5.28838	34.8392	15.1491
Koike_CLKBMAL1_P1290	AR_G256	3_AR256	intron	2.96396	18.7752	3.82957	16.2293	4.76135	5.88877	Pmpcb	6.052	7.149	6.239	6.094	3.958	5.582	7.897	5.531	6.209	6.799	4.688	4.466	35.854	37.26	38.469	38.105	34.331	38.466	32.187	40.232	41.293	34.975	29.962	36.184	8.23948	16.5274	22.0121	15.7664	3.23022	5.95542	3.55764	27.0267	15.2754	25.792	16.7654	12.6248	10.5768	17.4196	22.7236
Koike_CLKBMAL1_P1291	AR_G257	3_AR257	TSS	6.48729	51.9033	4.91055	24.8346	22.1219	56.8494	Mst1	55.912	56.78	37.984	54.503	66.242	63.354	78.14	65.129	45.223	55.674	48.563	54.689	34.023	30.166	30.254	34.422	27.905	29.143	32.091	30.842	27.684	35.461	38.335	34.952	18.7645	17.9632	21.1968	22.4961	6.75918	11.0536	2.29078	33.7606	42.0073	63.0471	20.1184	7.89049	17.3074	69.1505	28.4619
Koike_CLKBMAL1_P1294	AR_G258	3_AR258	3' UTR	8.91298	58.9386	8.76386	24.9909	8.46958	5.44876	Il17rb	5.569	4.771	6.108	6.09	5.297	5.43	5.461	6.057	5.506	5.914	4.946	4.237	1.809	2.535	2.338	1.948	2.213	1.622	2.038	2.878	2.836	3.068	2.459	1.987	10.5578	14.3238	9.36316	26.2773	21.1925	10.422	5.15424	28.3917	34.3696	54.4497	55.1733	18.2199	31.7303	104.518	68.1707
Koike_CLKBMAL1_P1296	AR_G259	3_AR259	TSS	7.56549	36.2241	3.5652	19.6337	10.8171	10.502	Klf9	9.205	9.536	13.225	18.873	7.228	9.791	8.992	9.545	8.786	11.509	10.127	9.206	22.502	13.819	14.756	8.655	14.621	10.031	17.513	14.877	19.846	8.88	14.468	9.158	4.78293	27.913	27.5954	16.3806	9.24253	4.46656	2.29078	35.1256	35.0639	28.6578	45.7237	6.31239	10.5768	8.7098	22.7236
Koike_CLKBMAL1_P1302	AR_G260	3_AR260	intron	3.16941	39.0571	3.68246	22.2275	6.09808	7.65292	Suclg2	7.062	6.65	10.18	6.494	6.952	8.207	8.561	6.317	11.353	5.214	7.782	7.063	46.89	77.673	73.872	63.336	75.083	66.642	46.826	84.831	90.339	59.943	61.03	58.865	10.1573	23.9064	27.7189	13.2274	4.31318	1.48885	5.25837	42.0415	30.5507	22.9262	13.4123	22.0934	15.8651	17.4196	30.2981
Koike_CLKBMAL1_P1303	AR_G261	3_AR261	TSS	3.2789	27.5998	5.21693	16.4759	5.21384	10.3991	Xrn2	8.868	10.398	10.967	7.843	7.642	9.951	11.531	9.835	18.292	9.237	7.963	12.263	7.801	8.152	7.314	6.917	7.72	7.342	8.438	8.128	8.909	7.041	6.574	7.676	5.06464	11.0183	15.49	15.7664	4.31318	3.72214	0.572694	15.0148	34.3696	20.0604	3.35307	1.5781	18.5093	17.4196	7.57453
Koike_CLKBMAL1_P1315	AR_G262	3_AR262	intron	5.19732	52.3184	5.08348	26.7747	15.6638	44.654	Cyp2f2	32.945	44.483	38.28	56.139	41.032	60.036	34.556	45.069	36.864	50.489	45.191	50.764	471.326	331.011	391.667	357.214	308.114	373.188	489.731	297.081	298.588	367.399	422.307	347.183	0.0138163	22.7378	31.5976	23.8748	11.7072	7.44427	3.64442	23.2957	61.9115	51.3234	26.8246	14.2029	34.3745	34.8392	55.5466
Koike_CLKBMAL1_P1318	AR_G263	3_AR263	TSS	6.04513	41.4945	4.74333	20.2145	18.6572	15.5667	Pdia4	18.852	10.901	10.224	9.619	44.902	14.093	23.417	8.362	14.155	12.97	6.154	13.151	74.478	60.458	44.887	74.001	66.646	84.718	85.193	60.782	58.355	100.16	76.563	118.832	20.8746	15.4256	12.7477	13.2137	10.6989	11.9108	2.29078	17.1078	34.3696	28.6578	26.8246	11.0467	21.1535	42.2293	37.8726
Koike_CLKBMAL1_P1323	AR_G264	3_AR264	intron	6.42789	60.1058	7.19393	15.8028	8.11955	6.15162	4931406C07Rik	4.169	6.992	10.714	4.8	5.738	7.261	5.335	3.636	10.636	6.696	3.308	4.535	66.895	95.328	93.165	84.04	100.462	87.941	58.048	99.572	129.235	73.42	80.861	59.145	10.6312	7.71281	21.1968	15.821	16.6366	3.72214	4.58155	39.0386	42.0073	66.1734	28.6535	20.5153	18.1888	52.2587	15.1491
Koike_CLKBMAL1_P1328	AR_G265	3_AR265	intron	7.44513	33.2494	7.29694	12.1645	4.38375	15.2307	Mbnl1	18.272	13.7	15.259	9.406	11.02	12.608	16.427	15.169	26.549	12.491	17.139	14.728	10.482	10.999	11.302	11.671	10.938	10.317	11.034	11.009	11.853	10.692	11.634	9.869	11.4298	10.5842	13.6124	18.5374	11.9313	5.95542	3.48823	21.0208	32.518	48.7182	34.3436	15.255	13.2209	17.4196	7.57453
Koike_CLKBMAL1_P1329	AR_G266	3_AR266	TSS	5.51474	61.8482	2.37009	23.4635	0.245278	11.1837	Cltc	10.93	10.901	9.771	7.451	9.893	12.958	13.426	10.575	15.024	10.545	8.319	14.412	31.512	29.815	25.278	29.245	28.252	32.647	32.913	28.11	28.903	30.724	27.718	31.558	23.7479	30.8512	19.5663	10.8112	4.31318	2.23328	2.29078	37.2186	57.2826	53.8419	30.1777	4.73429	18.5093	17.4196	51.415
Koike_CLKBMAL1_P1338	AR_G267	3_AR267	intron	4.26585	29.7158	4.54594	22.5487	6.09465	19.2265	2900026A02Rik	14.051	25.005	27.614	22.319	21.005	21.786	19.402	25.369	12.014	20.055	8.431	13.668	11.099	20.798	12.244	14.077	13.708	11.87	12.408	20.393	13.863	16.673	13.944	15.795	7.88757	52.821	52.1521	33.594	22.8729	14.0539	5.18895	63.4263	76.4925	60.4418	59.2376	7.74703	37.7398	52.2588	13.5423
Koike_CLKBMAL1_P1347	AR_G268	3_AR268	intron	2.86289	49.3181	5.08588	20.3048	1.02928	66.8332	Haao	65.417	76.601	60.619	67.736	71.005	81.337	93.929	79.024	52.193	57.721	46.962	49.454	77.32	107.13	89.33	78.774	87.424	85.011	78.59	102.503	94.489	74.398	91.481	80.774	7.19058	15.4256	17.9358	15.1111	10.4749	4.94029	4.1824	26.2987	34.3696	23.6209	36.8838	4.73429	34.3745	8.7098	15.1491
Koike_CLKBMAL1_P1368	AR_G269	3_AR269	intergenic-10kbless	4.25862	74.7302	3.46596	16.2316	11.9714	4.84682	Pptc7	3.13	4.172	5.459	10.248	2.808	4.832	3.041	3.796	4.012	6.956	4.593	5.115	4.756	3.719	4.809	3.84	3.801	3.502	3.514	4.333	4.269	4.172	3.484	3.61	8.54735	18.3304	19.2698	12.5448	7.76746	6.00054	4.00886	48.0475	63.6474	40.9893	30.1777	8.22524	23.7977	34.8392	30.2981
Koike_CLKBMAL1_P1369	AR_G270	3_AR270	intron	6.32003	42.5262	4.75531	20.7818	8.32315	10.3003	Chpt1	4.046	9.029	16.588	10.535	2.833	13.035	9.094	4.231	28.761	9.642	6.163	9.646	29.383	65.465	54.22	48.177	67.384	52.467	33.958	75.901	85.429	41.589	46.202	40.964	9.93887	17.4289	20.8509	15.9438	12.5288	7.33148	4.52949	24.0237	36.3369	57.8366	23.4715	1.67374	5.28838	8.7098	7.57453
Koike_CLKBMAL1_P1374	AR_G271	3_AR271	3' UTR	5.69924	28.8355	3.02602	18.9985	17.1408	27.4209	Dhcr24	15.536	27.978	28.684	27.238	34.952	48.186	32.47	23.99	14.233	41.503	12.013	22.268	121.401	179.882	146.093	173.85	152.238	146.452	114.724	185.237	176.776	194.862	141.133	158.071	11.5743	22.1034	24.7543	13.4321	4.31318	3.40632	2.86347	6.00593	45.8261	22.9262	16.7654	4.73429	26.4419	43.549	53.0217
Koike_CLKBMAL1_P1376	AR_G272	3_AR272	TSS	6.6166	51.2389	5.95272	23.5507	8.65185	5.60646	Pdcd11	5.739	6.042	5.942	5.542	6.633	5.092	6.347	5.589	4.275	7.288	4.549	4.239	2.523	2.321	2.21	2.451	2.002	2.083	2.57	2.281	1.928	2.911	2.352	1.906	10.1704	16.5274	16.3052	18.0187	10.4749	6.69985	1.14539	27.0267	30.5507	40.1209	30.1777	9.46859	29.0861	43.5489	7.57453
Koike_CLKBMAL1_P1378	AR_G273	3_AR273	intron	9.51753	44.7594	3.84827	25.686	9.54073	7.91383	Nfix	5.82	10.318	7.797	12.357	7.524	6.387	7.552	9.716	4.526	10.631	6.888	5.45	7.959	9.35	7.636	8.184	8.014	7.999	10.069	8.703	6.581	8.979	7.883	7.701	2.81663	23.1384	23.0497	17.2679	8.4023	5.95542	4.58155	20.5658	21.7558	28.6578	43.59	7.89049	15.8651	43.549	22.7236
Koike_CLKBMAL1_P1384	AR_G274	3_AR274	intron	4.79136	42.2094	2.74649	22.4236	2.25687	58.6397	Fah	56.784	60.507	52.16	51.697	36.82	67.009	75.132	69.315	69.765	54.126	51.828	58.533	174.826	197.369	218.199	201.198	193.164	183.398	170.677	193.352	197.896	200.084	195.485	177.851	11.936	25.509	16.6017	12.3128	12.2674	6.69985	4.58155	30.0297	30.5507	23.8815	33.5307	14.1072	21.1535	43.549	30.2981
Koike_CLKBMAL1_P1386	AR_G275	3_AR275	TSS	6.64056	59.5594	5.77395	19.1333	6.62805	40.8437	Oaf	35.118	44.701	48.403	65.762	30.895	52.658	40.358	42.928	31.487	38.818	18.733	40.263	54.897	75.758	61.372	64.772	52.696	52.892	58.776	77.966	61.009	61.196	55.28	57.127	7.66703	11.252	18.751	15.7664	8.01019	5.95542	2.86347	46.1365	42.0073	33.6077	46.943	11.7162	26.522	26.1294	20.8873
Koike_CLKBMAL1_P1395	AR_G276	3_AR276	exon	5.12665	45.1161	3.02495	20.0201	8.63565	6.95231	Galm	4.785	9.53	8.476	8.703	5.05	6.217	5.84	7.417	5.881	8.893	6.516	6.118	24.508	35.306	34.723	35.158	34.04	34.687	24.199	36.205	38.382	32.372	31.001	29.139	11.7339	23.1384	15.49	13.0636	5.54552	3.72214	2.29078	27.0267	45.8261	34.9972	23.4715	9.46859	10.5768	165.486	60.5962
Koike_CLKBMAL1_P1406	AR_G277	3_AR277	TSS	9.06883	14.5254	3.28315	8.67699	9.54781	4.55957	Ecsit	3.995	5.086	4.367	5.148	5.547	4.938	4.864	5.219	3.196	6.258	3.057	3.041	16.115	16.184	16.687	16.105	14.25	14.529	14.677	15.474	16.978	16.977	16.78	14.57	10.8957	19.3655	14.6747	14.0873	8.75706	2.23328	1.71808	12.0119	7.63768	25.792	23.4715	7.89049	10.5768	26.1294	22.7236
Koike_CLKBMAL1_P1409	AR_G278	3_AR278	intron	3.56389	45.1206	4.93342	19.4042	5.05167	22.6647	Klkb1	12.18	27.228	22.537	25.323	11.262	22.18	25.395	34.751	27.2	25.149	9.396	29.375	79.96	81.414	78.069	76.966	77.922	88.668	81.973	76.448	73.487	81.234	75.66	68.602	1.46025	14.3238	19.5663	15.3159	12.9395	5.21099	4.00886	39.0386	38.1884	17.1947	36.8838	9.46859	15.8651	69.6784	45.4472
Koike_CLKBMAL1_P1410	AR_G279	3_AR279	3' UTR	6.19816	42.7478	4.82177	17.9571	19.8349	5.66117	Tmem93	6.211	5.249	6.125	4.4	6.154	6.977	5.264	4.11	6.637	5.497	4.896	6.413	31.081	31.656	35.239	35.067	32.75	35.154	30.368	35.399	39.488	30.369	28.682	29.008	9.64889	15.4256	22.185	15.3159	9.80268	4.19586	2.75934	18.0178	34.3696	37.2551	26.8246	7.89049	15.8651	26.1294	30.2981
Koike_CLKBMAL1_P1411	AR_G280	3_AR280	intron	5.75327	38.5244	2.15697	23.8048	0.0646432	14.1935	Atxn1	9.98	18.289	7.329	12.407	22.575	11.139	10.2	33.261	6.57	7.111	15.48	15.981	1.712	0.7	1.123	1.939	1.244	2.04	1.554	1.036	1.203	1.59	3.76	1.37	18.6817	25.6426	20.3815	11.1525	4.31318	8.12102	4.66832	37.4006	22.913	37.2551	16.7654	14.2029	6.41016	69.4144	7.57453
Koike_CLKBMAL1_P1412	AR_G281	3_AR281	intron	2.77083	43.9444	4.65055	23.6386	7.7487	4.71137	Obfc2a	4.083	3.354	4.664	4.212	3.225	4.07	5.922	4.026	8.045	5.784	3.897	5.254	3.305	3.178	3.015	4.303	2.375	3.049	4.278	4.085	3.864	4.156	1.953	2.685	7.97946	15.4256	21.1968	14.0464	11.6138	6.69985	1.83956	33.0326	34.3696	11.4631	16.7654	9.0382	13.2209	26.1294	0
Koike_CLKBMAL1_P1435	AR_G282	3_AR282	intron	5.7937	48.6574	4.68356	20.4434	4.60476	4.25452	AK029023	4.737	5.264	6.373	2.792	3.525	4.133	4.378	3.719	5.899	3.511	2.558	4.167	2.372	3.574	3.19	3.256	3.987	4.322	2.658	4.636	4.769	2.523	3.152	2.825	9.38676	12.1201	23.692	15.548	6.6845	4.5568	2.53374	33.0326	30.5507	45.8524	23.4715	9.18166	7.93257	69.6784	45.4472
Koike_CLKBMAL1_P1436	AR_G283	3_AR283	intergenic-10kbless	6.22165	41.2031	3.85694	24.2533	19.1838	101.668	Aldh1l1	100.994	93.961	73.418	138.578	84.107	167.46	119.496	88.133	65.088	100.817	105.564	82.4	188.642	234.992	232.719	206.894	206.375	198.138	173.142	211.582	231.736	234.395	251.794	195.933	12.473	23.1384	19.5663	14.7699	7.76746	5.21099	1.71808	21.2028	26.7319	34.3893	16.7654	6.31239	2.64419	17.4196	22.7236
Koike_CLKBMAL1_P1437	AR_G284	3_AR284	intron	3.87618	63.9809	3.38487	22.6896	20.196	44.2113	Lifr	63.18	45.394	21.798	28.433	50.633	24.99	30.809	70.767	32.466	39.068	90.293	32.705	71.112	15.177	36.659	25.526	19.335	26.342	75.544	16.198	13.836	41.161	36.828	29.792	0.631852	17.6293	19.6157	11.9033	9.37323	6.69985	4.00886	63.0623	49.6449	20.0604	40.2369	7.89049	5.28838	32.1999	30.7572
Koike_CLKBMAL1_P1442	AR_G285	3_AR285	intron	4.19068	42.2019	3.43682	16.9883	17.9135	81.2102	Gcgr	76.952	85.628	72.663	80.696	93.04	81.497	92.597	82.204	60.634	99.688	75.56	73.362	72.35	68.144	61.431	66.391	65.824	67.701	66.503	71.113	68.012	60.68	68.806	66.92	1.89079	22.6042	14.2053	10.2788	10.6803	2.97771	1.87427	33.0326	34.3696	40.1209	13.4123	11.0467	13.2209	34.8392	53.0217
Koike_CLKBMAL1_P1443	AR_G286	3_AR286	intron	7.23998	36.0732	7.79032	9.55609	20.196	44.2113	Lifr	63.18	45.394	21.798	28.433	50.633	24.99	30.809	70.767	32.466	39.068	90.293	32.705	71.112	15.177	36.659	25.526	19.335	26.342	75.544	16.198	13.836	41.161	36.828	29.792	0.631852	16.2269	21.4192	15.8346	13.4623	11.2792	2.82876	63.5173	53.5795	76.0733	69.5001	28.6449	31.57	76.2766	68.1707
Koike_CLKBMAL1_P1454	AR_G287	3_AR287	TSS	4.79843	37.3543	4.09064	16.4433	0.395257	4.67488	Mtdh	4.483	4.088	4.962	2.777	3.764	5.898	4.754	4.905	6.088	4.447	3.282	6.651	5.305	5.177	4.931	5.551	5.471	5.895	5.462	5.423	5.187	5.607	5.661	5.926	20.3825	14.0567	16.3052	11.7258	4.31318	4.98541	0.572694	18.0178	34.3696	34.3893	6.70615	12.6248	13.2209	8.44586	22.7236
Koike_CLKBMAL1_P1461	AR_G288	3_AR288	intergenic-10kbless	5.70503	85.3724	3.63519	20.2825	7.77913	33.9296	Zfp36	24.185	28.94	45.967	47.206	20.62	35.106	38.69	27.787	50.355	32.241	16.866	39.194	19.139	41.334	30.791	17.754	21.282	18.28	16.874	40.192	34.267	28.191	37.501	23.966	8.94518	22.7044	24.7296	18.2917	6.62848	5.27867	1.71808	63.0623	69.3178	83.1075	55.8846	11.0467	18.5895	52.2587	53.0217
Koike_CLKBMAL1_P1464	AR_G289	3_AR289	TSS	2.07634	50.3676	3.72811	17.6546	0.841532	4.12073	Snrpa	6.681	4.555	3.745	3.667	5.071	2.582	4.92	4.036	3.504	3.451	3.863	3.376	6.694	7.251	6.908	6.156	8.037	6.597	6.956	6.676	6.547	7.737	7.884	8.498	19.4932	16.5274	20.6533	10.5792	7.39402	2.23328	0.572694	39.0386	26.7319	42.9866	10.0592	15.781	29.0861	8.70978	38.7908
Koike_CLKBMAL1_P1467	AR_G290	3_AR290	intron	4.23563	53.9215	4.81448	16.5934	6.65263	7.25228	AK168184	6.208	9.695	8.375	10.532	5.854	6.7	7.92	8.207	4.838	7.62	5.401	5.678	2.025	2.23	1.971	2.496	2.147	3.012	1.714	1.633	1.671	1.302	2.091	1.753	20.9099	14.6577	16.3052	13.1182	9.61596	4.46656	2.29078	45.0445	53.4638	46.1129	20.1184	20.4196	18.5093	60.9685	22.7236
Koike_CLKBMAL1_P1470	AR_G291	3_AR291	intergenic-10kbless	7.06347	48.9965	5.33515	23.8827	19.1309	11.0514	Pttg1ip	11.52	9.174	9.8	13.504	10.232	14.675	12.036	11.642	7.749	12.152	10.058	10.074	78.875	93.871	79.991	84.888	91.411	103.065	75.658	88.916	84.998	67.1	81.597	89.665	23.591	13.8563	18.6769	18.4965	11.6325	4.80494	5.72694	27.0267	25.4589	28.6578	33.5307	11.0467	14.9837	0	30.2981
Koike_CLKBMAL1_P1476	AR_G292	3_AR292	TSS	3.57992	17.3725	3.66536	11.0908	9.6773	6.63448	Wdr81	4.197	6.346	6.867	10.173	6.543	5.643	6.725	10.616	3.228	9.639	5.424	4.213	6.11	5.204	4.71	5.302	5.177	4.541	5.514	5.73	3.681	5.288	6.872	4.99	21.879	26.4439	18.7757	10.6065	6.85254	2.23328	1.21481	33.0326	30.5507	34.3893	13.4123	1.5781	26.4419	8.7098	30.2981
Koike_CLKBMAL1_P1487	AR_G293	3_AR293	TSS	6.04588	54.855	4.78637	23.7932	5.01506	8.77868	Smek2	7.62	10.183	9.013	6.783	5.82	8.358	8.937	9.653	13.801	8.125	7.346	9.705	8.479	7.582	7.564	7.706	7.92	8.438	8.836	7.987	7.922	7.039	6.818	6.98	2.98514	14.3238	19.5663	15.6981	7.39402	6.69985	5.46662	33.0326	28.4677	33.1735	33.5307	10.5685	16.6664	26.1294	7.57453
Koike_CLKBMAL1_P1488	AR_G294	3_AR294	TSS	7.48268	47.7078	5.58637	24.4615	20.6658	9.69874	Stard4	5.939	7.878	10.299	3.454	8.645	13.971	8.902	10.014	13.984	8.342	11.07	13.888	12.988	25.344	23.636	20.757	16.743	22.944	13.622	27.857	18.586	26.999	21.392	16.558	10.9459	16.5274	20.431	19.8206	12.3234	5.86518	2.86347	18.0178	36.684	34.3893	43.4884	9.32513	10.5768	8.7098	0
Koike_CLKBMAL1_P1502	AR_G295	3_AR295	TSS	8.75619	64.4393	7.38342	24.6007	9.14324	14.0135	Plcg1	13.755	17.135	13.71	16.033	12.029	11.546	15.059	13.099	10.927	19.555	14.024	11.291	5.12	6.063	5.788	4.765	4.52	5.15	5.416	5.979	5.153	4.998	5.123	4.598	6.40923	13.222	15.49	15.7664	17.2527	8.21126	5.03276	33.0326	22.4502	51.584	35.8677	25.2496	21.1535	87.0979	75.7452
Koike_CLKBMAL1_P1528	AR_G296	3_AR296	intron	9.35371	28.9974	6.02345	20.7929	2.53909	11.5248	Cmtm8	8.35	14.372	13.147	12.31	9.277	13.869	15.666	16.231	8.659	8.77	5.618	12.029	18.025	27.71	20.33	17.595	18.961	20.063	17.522	28.71	19.641	15.781	20.127	16.301	6.23462	13.3889	12.2289	18.319	10.7923	7.57962	3.31468	21.8398	3.81884	34.8235	26.8246	9.46859	12.1793	26.1294	7.57453
Koike_CLKBMAL1_P1532	AR_G297	3_AR297	TSS	6.22489	31.0626	4.55827	11.7973	11.1096	7.32172	1110003E01Rik	8.101	6.019	8.19	9.008	9.382	6.058	8.179	6.741	6.832	7.531	4.762	7.058	20.678	18.337	20.231	22.602	17.185	21.82	19.28	20.214	23.063	20.553	18.285	22.909	10.2249	11.0183	13.8595	10.8112	6.16169	5.21099	0.572694	15.0148	38.1884	31.5235	33.5307	4.73429	18.5093	60.9685	30.2981
Koike_CLKBMAL1_P1534	AR_G298	3_AR298	intron	3.92393	61.6655	4.8915	22.5195	10.6773	6.45411	Sfmbt1	5.538	5.96	6.655	6.749	5.981	5.971	7.242	6.197	6.562	8.023	5.803	6.767	3.536	4.003	3.774	3.883	4.108	3.366	3.899	4.016	3.866	3.705	3.298	4.254	7.02206	16.5274	15.49	15.3159	8.02886	8.03079	4.00886	45.0445	38.1884	20.0604	43.59	12.6248	13.2209	52.2588	15.1491
Koike_CLKBMAL1_P1535	AR_G299	3_AR299	intron	7.92898	35.8143	4.08126	18.1402	12.7768	12.0666	Epas1	6.482	11.476	10.622	11.969	16.498	12.276	11.413	14.231	9.241	20.688	9.054	10.85	13.013	19.237	13.976	11.693	14.795	11.306	16.526	19.949	17.446	16.53	16.331	12.206	7.61712	16.0266	22.7285	12.3674	8.36495	7.44427	2.74199	21.0208	19.0942	36.9077	33.3275	10.1859	10.5768	87.0979	22.7236
Koike_CLKBMAL1_P1540	AR_G300	3_AR300	intron	3.72358	71.9093	3.21964	14.8666	16.7584	8.30876	Gse1	5.755	8.653	6.609	7.343	14.115	13.752	8.402	6.258	3.753	12.55	7.024	5.491	3.568	2.769	1.942	3.684	2.991	1.901	3.325	2.971	1.583	4.148	4.088	3.232	18.8336	17.6293	16.2558	12.149	1.23234	7.44427	2.49903	71.5252	75.7982	36.2998	46.943	9.46859	21.1535	121.937	60.5962
Koike_CLKBMAL1_P1542	AR_G301	3_AR301	intron	5.77626	23.7213	4.57268	8.77811	2.03047	8.03927	Snx13	6.454	8.157	6.913	5.934	4.704	8.071	9.393	9.589	11.112	7.074	8.136	10.934	5.235	5.828	5.582	5.575	6.068	6.713	5.128	6.29	5.926	5.07	6.36	5.654	19.9717	11.0183	16.577	10.0468	10.4749	8.1887	3.43616	27.0267	19.0942	28.6578	30.1777	3.1562	13.2209	17.4196	15.1491
Koike_CLKBMAL1_P1543	AR_G302	3_AR302	intron	2.43098	47.8089	3.31819	19.868	0.827919	24.3461	Hagh	26.057	27.217	20.99	20.774	22.87	28.337	30.511	26.439	19.159	31.224	17.523	21.052	84.167	93.351	91.035	74.889	89.561	76.942	93.105	95.779	86.955	82.27	83.559	80.153	6.07084	25.3421	17.1205	14.415	8.30894	5.21099	1.66602	50.7775	21.7558	31.5235	36.0709	14.2029	21.7945	17.4196	22.7236
Koike_CLKBMAL1_P1550	AR_G303	3_AR303	exon	3.30489	30.0276	4.3677	21.7907	5.02185	4.89908	Nmd3	4.725	4.443	5.437	4.104	3.331	4.863	5.518	4.055	8.68	3.911	3.98	5.742	5.444	5.762	7.89	6.34	6.199	5.621	7.287	6.396	6.041	5.716	5.158	6.641	7.57146	20.1334	26.5331	19.1107	5.75091	8.1887	3.26262	20.6568	38.1884	24.9236	7.92545	9.46859	13.2209	24.5458	22.7236
Koike_CLKBMAL1_P1554	AR_G304	3_AR304	intron	3.71008	54.7198	3.60855	21.0712	18.7537	26.4157	Slc6a13	15.025	33.103	25.756	16.53	33.806	36.987	24.389	25.307	20.721	35.633	16.967	32.766	38.509	39.964	28.735	39.69	39.857	36.671	40.223	40.856	36.269	33.407	41.56	37.46	23.3076	24.7745	15.7617	16.7492	5.50817	6.69985	1.71808	53.4164	40.2714	50.1077	23.4715	12.6248	26.4419	87.0979	30.2981
Koike_CLKBMAL1_P1560	AR_G305	3_AR305	intergenic-10kbless	7.92022	35.9835	4.13858	21.2737	5.57844	5.61437	1110018J18Rik	4.305	6.059	4.548	7.183	5.456	5.679	4.45	8.591	5.161	5.195	4.093	6.651	15.21	17.914	11.706	14.053	18.389	15.087	14.961	17.846	14.68	10.331	16.843	16.22	0.394429	15.4256	20.5298	16.0803	3.93974	9.79035	4.00886	21.0208	19.0942	14.3289	33.5307	6.31239	18.5093	17.4196	15.1491
Koike_CLKBMAL1_P1562	AR_G306	3_AR306	TSS	3.06578	66.5264	5.16807	19.4563	6.34496	7.45342	Polg	6.571	8.569	7.555	6.59	5.932	6.412	9.669	7.803	6.288	10.817	7.319	5.917	6.031	7.601	6.551	6.459	6.143	5.913	6.87	7.714	6.375	6.571	6.362	5.913	7.19326	13.222	14.3536	13.0636	9.76534	7.17357	8.01771	54.9634	39.3456	48.1971	30.1777	7.89049	50.2396	87.0979	37.8726
Koike_CLKBMAL1_P1563	AR_G307	3_AR307	intergenic-10kbless	5.88066	30.1028	5.15926	18.69	3.09878	17.0203	Adcy9	16.735	24.585	16.979	17.466	16.037	15.868	19.462	24.602	12.013	12.865	14.366	13.267	3.513	4.25	3.491	3.059	3.072	3.525	4.423	4.348	3.382	3.074	3.544	3.656	3.74576	9.91647	16.6511	8.72269	8.55167	7.87288	2.86347	27.0267	19.0942	20.0604	21.8458	9.46859	6.49028	43.5489	22.7236
Koike_CLKBMAL1_P1565	AR_G308	3_AR308	TSS	2.22615	43.0331	3.29324	17.3189	4.08749	8.38639	Ddb1	8.649	8.751	8.634	6.928	7.415	7.238	10.265	8.987	8.92	9.918	6.833	8.099	31.143	33.127	29.542	33.297	30.726	31.905	32.495	33.565	33.662	33.845	29.407	31.472	8.09529	13.222	16.3052	8.46333	5.56419	2.23328	5.15424	33.0326	26.7319	14.3289	20.1184	6.31239	27.9643	60.9685	22.7236
Koike_CLKBMAL1_P1579	AR_G309	3_AR309	intron	1.28935	34.8907	4.89809	13.2129	23.0794	33.4973	Agpat2	52.18	29.023	30.961	28.989	26.681	55.524	37.512	21.197	41.414	26.231	22.137	30.118	69.934	70.384	58.913	74.095	91.093	91.018	70.768	75.67	110.632	70.024	78.251	78.683	17.5716	8.81464	19.7886	11.7122	7.39402	1.48885	3.43616	36.0356	30.0878	28.2236	13.4123	8.51217	21.1535	29.2966	0
Koike_CLKBMAL1_P1583	AR_G310	3_AR310	intron	5.81626	49.6625	4.55125	27.3468	1.47455	99.0449	Cat	77.051	105.972	84.074	103.021	78.84	125.443	119.281	125.051	106.23	89.548	42.776	131.251	749.091	1002.12	866.959	810.406	890.648	875.755	771.368	972.097	924.397	855.471	882.01	733.363	9.48119	17.6293	24.4579	14.415	11.091	8.93313	4.00886	18.0178	45.8261	34.3893	13.4123	17.3591	13.2209	17.4196	32.3639
Koike_CLKBMAL1_P1585	AR_G311	3_AR311	intron	5.06915	48.3403	2.94605	21.9605	12.1427	8.31999	Vgll4	8.221	8.428	7.684	13.869	9.607	7.507	7.135	6.712	7.489	9.583	7.074	6.532	4.101	2.265	2.427	2.916	3.629	2.509	5.41	2.587	3.08	3.177	1.955	3.579	0.747474	23.2052	15.49	13.0636	5.54552	6.69985	3.43616	33.0326	34.8325	31.5235	23.4715	4.73429	7.93257	8.70978	15.1491
Koike_CLKBMAL1_P1590	AR_G312	3_AR312	intron	4.85072	22.2372	4.42803	19.4336	12.7768	12.0666	Epas1	6.482	11.476	10.622	11.969	16.498	12.276	11.413	14.231	9.241	20.688	9.054	10.85	13.013	19.237	13.976	11.693	14.795	11.306	16.526	19.949	17.446	16.53	16.331	12.206	7.61712	16.7278	16.0582	13.0636	8.01019	5.21099	4.82451	15.6518	22.913	31.5235	6.70615	3.1562	10.5768	43.549	0
Koike_CLKBMAL1_P1595	AR_G313	3_AR313	intergenic-10kbless	4.56557	48.249	3.65103	18.6576	6.79306	273.268	BC024386	200.614	285.968	278.325	327.295	186.775	274.692	336.616	345.421	212.599	366.449	225.734	238.724	75.334	105.787	96.298	109.603	95.158	90.36	82.649	97.327	79.563	96.992	110.309	94.273	14.7987	18.7311	15.49	11.0842	10.4375	6.69985	4.00886	48.0475	36.3369	40.1209	26.8246	14.0116	25.9611	32.4638	32.3639
Koike_CLKBMAL1_P1598	AR_G314	3_AR314	TSS	5.69605	74.6688	4.86227	22.7017	10.8436	6.42434	Lmbr1l	3.447	6.834	6.326	9.818	4.998	5.421	5.047	8.26	4.171	11.304	5.888	5.579	2.915	2.217	2.438	2.832	2.146	1.504	2.689	1.945	2.122	2.891	2.602	2.79	15.7969	16.5274	17.7628	13.514	11.091	8.1887	0.572694	12.0119	76.3768	25.792	57.0023	4.3039	31.7303	43.549	37.8726
Koike_CLKBMAL1_P1600	AR_G315	3_AR315	intron	5.64415	31.6119	5.35463	17.1085	1.47455	99.0449	Cat	77.051	105.972	84.074	103.021	78.84	125.443	119.281	125.051	106.23	89.548	42.776	131.251	749.091	1002.12	866.959	810.406	890.648	875.755	771.368	972.097	924.397	855.471	882.01	733.363	9.48119	11.0183	19.5663	17.2952	9.24253	5.21099	4.58155	18.0178	26.7319	20.0604	26.8246	18.4111	10.5768	95.2798	53.0216
Koike_CLKBMAL1_P1601	AR_G316	3_AR316	intron	6.77983	39.8813	6.00844	19.6694	8.34285	4.90207	Foxk1	4.166	5.701	5.857	6.822	4.574	3.815	4.692	5.831	4.146	4.766	4.742	3.715	2.989	3.786	3.118	2.821	3.057	2.721	2.915	4.076	2.996	2.778	3.083	3.048	6.06463	6.61098	23.6426	17.6774	7.00192	5.25611	4.5642	29.6657	19.5571	36.9946	41.3546	4.3039	15.8651	34.8392	22.7236
Koike_CLKBMAL1_P1602	AR_G317	3_AR317	TSS	8.9914	65.3369	5.75579	17.3758	4.29081	8.1167	Rnf13	6.423	8.726	11.288	5.455	4.345	9.252	8.301	9.072	14.093	4.757	5.245	10.445	29.166	37.267	42.768	39.099	33.955	38.228	29.866	40.401	40.545	36.048	34.531	33.31	10.9208	14.3238	11.3643	11.6166	12.0246	3.88005	0.937135	19.8378	34.1381	68.7786	53.6492	17.3591	7.93257	34.8392	31.4458
Koike_CLKBMAL1_P1610	AR_G318	3_AR318	intron	9.45041	29.2484	5.92866	11.3498	12.0489	8.91957	4933407C03Rik	6.037	8.413	11.323	10.749	10.089	10.271	6.958	7.811	6.431	15.128	7.37	6.455	3.475	4.142	3.544	4.278	3.691	4.87	3.292	4.408	4.539	5.137	3.703	3.535	12.6184	10.818	14.6747	15.7664	9.24253	6.69985	2.86347	21.0208	19.0942	37.2551	36.0709	7.89049	18.5093	26.1294	51.1854
Koike_CLKBMAL1_P1613	AR_G319	3_AR319	intron	9.22257	43.0883	6.82812	13.9323	6.28723	5.10562	Ndufb9	5.385	6.174	5.354	6.983	3.644	5.596	4.843	4.654	5.107	4.572	4.511	4.442	145.666	159.305	163.472	155.429	157.115	147.431	130.403	166.596	164.732	144.316	146.692	143.91	10.0876	10.7846	15.5888	26.209	10.3068	5.95542	1.71808	18.0178	39.2299	82.2391	71.329	14.7289	16.5863	8.7098	7.57453
Koike_CLKBMAL1_P1614	AR_G320	3_AR320	TSS	4.44744	61.8032	2.06279	30.0386	7.14419	23.5667	Zc3h11a	17.83	23.28	19.764	21.434	19.288	22.785	26.48	24.718	32.98	29.514	18.83	25.897	7.711	10.045	9.077	10.394	9.512	9.507	9.055	9.618	8.581	9.226	10.447	8.6	14.8718	36.3604	25.2731	9.55537	3.69701	4.46656	3.43616	30.0297	26.7319	48.284	20.1184	12.6248	31.7303	34.8392	0
Koike_CLKBMAL1_P1616	AR_G321	3_AR321	intron	8.09462	47.9138	4.76414	22.6856	12.4296	95.752	Apoa1	58.053	71.136	74.894	190.382	78.279	76.416	95.244	125.905	55.091	132.537	102.331	88.757	4355.72	2776.49	2931.85	3266.54	2652.75	2876.13	4440.61	2721.07	1966.39	3797.79	3312.37	3620.94	23.4724	13.222	26.0884	13.5686	9.8587	5.95542	5.55339	18.0178	34.3696	28.6578	52.1251	6.31239	26.4419	60.9686	22.7236
Koike_CLKBMAL1_P1621	AR_G322	3_AR322	TTS	6.52371	56.0852	4.84824	19.1131	6.78634	7.52337	Zfp36l2	6.697	9.108	9.089	6.606	5.773	5.723	8.821	7.534	9.967	7.268	9.159	4.534	7.276	14.768	8.949	9.063	11.524	9.733	6.971	12.252	13.453	9.329	14.02	9.274	11.362	16.5274	16.3052	13.4048	9.24253	6.69985	2.86347	46.7735	29.9721	63.0471	43.59	14.2029	18.91	43.549	53.0217
Koike_CLKBMAL1_P1629	AR_G323	3_AR323	intron	4.05308	93.6369	4.03986	14.6739	2.83041	6.82971	Aatf	6.113	7.918	8.197	5.606	8.323	7.233	7.716	7.319	5.558	7.119	4.283	6.571	2.804	3.705	3.795	3.262	2.968	2.601	2.366	3.839	2.651	2.666	3.359	2.547	9.34224	18.5308	19.5663	11.9169	8.70105	2.97771	2.29078	72.0712	87.8333	52.6261	48.772	20.5153	31.7303	52.2588	60.5962
Koike_CLKBMAL1_P1635	AR_G324	3_AR324	intron	6.39437	37.9291	7.30884	18.4951	12.7768	12.0666	Epas1	6.482	11.476	10.622	11.969	16.498	12.276	11.413	14.231	9.241	20.688	9.054	10.85	13.013	19.237	13.976	11.693	14.795	11.306	16.526	19.949	17.446	16.53	16.331	12.206	7.61712	9.91647	13.0442	11.289	15.3109	7.73753	4.51213	38.6746	15.2754	31.5235	26.8246	7.89049	7.93257	8.70978	15.1491
Koike_CLKBMAL1_P1637	AR_G325	3_AR325	intron	5.78637	36.7934	3.33528	13.6773	0.826997	53.442	C4bp	56.695	53.27	45.741	36.5	42.35	49.594	80	44.148	77.577	41.099	49.992	64.338	242.88	191.632	188.642	225.038	222.18	243.562	259.219	202.103	214.956	182.172	195.426	250.033	23.4919	16.5274	8.64672	13.514	9.24253	6.69985	5.81371	21.0208	32.2866	17.1947	36.8838	3.1562	23.7977	34.8392	7.57453
Koike_CLKBMAL1_P1640	AR_G326	3_AR326	intron	5.9261	47.5907	4.65358	23.4076	13.1708	14.7881	Igfbp1	3.013	2.9	8.86	59.775	3.854	7.854	6.967	25.83	7.642	4.666	11.1	34.995	2.832	3.658	5.352	3.163	6.098	3.139	4.339	3.466	17.41	8.23	13.068	13.358	15.3672	22.1034	29.7694	16.0121	13.1263	10.422	4.00886	42.0415	49.6449	36.0393	46.943	17.3591	15.3844	87.098	53.0217
Koike_CLKBMAL1_P1643	AR_G327	3_AR327	TSS	7.81545	33.9809	5.24495	12.6689	13.972	19.8815	Hhex	11.135	14.837	11.85	43.435	10.475	12.73	23.51	16.831	11.243	24.604	41.219	16.708	61.513	24.148	36.474	38.563	28.055	45.755	53.721	29.429	34.989	53.103	25.991	30.758	1.30186	8.81464	13.8595	9.91028	7.39402	4.46656	2.29078	15.0148	30.5507	40.1209	23.4715	12.6248	23.7977	8.70978	7.57453
Koike_CLKBMAL1_P1644	AR_G328	3_AR328	intron	8.03323	39.325	4.51218	17.0543	12.0815	3.26654	As3mt	0.863	3.132	3.981	3.839	4.168	3.913	1.492	3.648	2.001	7.28	2.107	2.775	10.121	13.029	10.183	10.284	11.44	8.355	7.879	10.74	9.816	9.93	9.86	10.905	9.72664	16.5274	16.3052	14.5924	6.77785	8.93313	2.86347	9.0089	30.5507	42.3788	36.8838	4.73429	21.1535	17.4196	38.1022
Koike_CLKBMAL1_P1645	AR_G329	3_AR329	intron	9.74313	69.8645	6.58562	21.4199	23.7112	15.8749	Acsl5	14.803	13.788	12.176	8.027	15.126	30.579	25.446	16.232	22.844	9.07	4.459	17.948	44.351	107.416	64.878	61.145	74.274	84.225	44.165	90.931	91.231	52.995	71.377	59.676	8.36449	14.3238	13.8595	21.6224	11.091	8.1887	1.73544	41.4046	33.5595	45.8524	73.7676	18.9372	21.1535	43.549	15.1491
Koike_CLKBMAL1_P1647	AR_G330	3_AR330	intron	5.106	25.6711	3.25393	15.9278	11.7093	14.5088	Ubr5	12.992	13.161	11.902	14.201	12.332	12.565	15.456	13.528	17.945	19.052	16.793	14.179	9.236	9.508	8.522	10.303	10.794	10.135	10.464	9.818	10.064	10.347	10.075	9.707	18.3813	16.5274	14.23	9.45982	8.49566	7.1059	2.42961	18.0178	22.913	30.6551	10.0592	11.6205	7.93257	26.1294	22.7236
Koike_CLKBMAL1_P1663	AR_G331	3_AR331	TSS	5.24895	47.2478	3.87628	15.3254	3.19083	6.84895	Arhgap12	6.863	7.303	7.068	5.785	4.908	7.487	8.095	7.146	9.198	5.873	5.322	7.14	5.189	5.422	4.167	4.625	4.825	5.142	5.266	4.854	4.27	4.655	4.069	4.745	1.9132	16.5274	17.1205	11.2617	4.31318	0.744427	2.29078	25.0247	57.2826	35.3446	31.1938	1.5781	26.4419	47.508	30.2981
Koike_CLKBMAL1_P1665	AR_G332	3_AR332	TSS	2.54638	45.7112	4.21579	13.7627	20.6658	9.69874	Stard4	5.939	7.878	10.299	3.454	8.645	13.971	8.902	10.014	13.984	8.342	11.07	13.888	12.988	25.344	23.636	20.757	16.743	22.944	13.622	27.857	18.586	26.999	21.392	16.558	10.9459	13.222	17.5405	11.7122	7.6741	4.46656	2.29078	57.0564	38.1884	17.1947	30.1777	9.46859	18.5093	58.5932	51.1855
Koike_CLKBMAL1_P1666	AR_G333	3_AR333	intron	3.1765	43.1129	3.49022	20.6019	3.96721	5.13093	1110008F13Rik	5.887	5.129	6.378	3.155	5.118	6.168	4.508	6.271	5.163	5.954	3.715	4.125	20.228	23.02	20.676	18.661	17.865	19.438	19.592	24.965	23.056	22.121	19.357	19.095	7.49997	22.0366	17.8616	12.1626	8.62636	3.88005	2.01311	39.0386	22.913	28.6578	16.7654	20.4675	15.8651	43.549	22.7236
Koike_CLKBMAL1_P1667	AR_G334	3_AR334	intron	3.95788	40.7142	4.89167	21.4951	15.7406	27.9466	Aass	28.319	19.231	15.54	47.19	16.677	31.58	27.414	26.133	24.742	25.625	50.024	22.881	48.948	49.338	63.714	53.347	57.103	48.969	44.354	52.091	54.955	56.115	53.746	49.399	12.8735	20.9348	18.751	12.2172	12.3234	8.93313	2.29078	41.6775	36.7997	35.1709	20.1184	14.2029	15.8651	43.549	7.57453
Koike_CLKBMAL1_P1668	AR_G335	3_AR335	intron	2.37769	51.4209	4.86442	21.2817	1.76307	5.26048	Cnot8	5.477	6.7	4.67	5.102	6.546	5.508	5.493	6.966	3.87	4.633	3.893	4.268	15.917	15.292	15.087	15.457	13.139	15.594	13.648	13.129	12.711	12.414	13.115	15.779	1.00299	14.3238	20.3815	11.2617	12.9395	5.27867	3.97415	54.0534	42.0073	22.9262	16.7654	14.2029	10.5768	26.1294	15.1491
Koike_CLKBMAL1_P1669	AR_G336	3_AR336	TSS	10.1021	41.8577	4.60791	12.62	19.8156	4.61717	Yif1b	9.057	4.113	3.996	3.411	6.985	4.147	4.391	2.837	2.956	4.034	6.332	3.146	10.177	8.052	9.907	9.519	6.986	9.966	10.984	7.197	9.868	11.717	9.365	10.124	18.607	14.3238	13.0442	9.25506	8.01019	3.72214	2.29078	27.0267	30.5507	22.9262	39.7288	23.4802	21.3138	52.2587	45.4471
Koike_CLKBMAL1_P1672	AR_G337	3_AR337	intron	4.81826	50.2189	4.54201	20.7482	13.8318	11.6755	Foxa3	10.48	6.33	9.173	16.866	13.93	8.841	9.243	11.301	3.198	27.002	15.305	8.436	23.393	7.452	20.129	16.044	17.598	12.538	20.217	10.586	11.478	18.927	13.158	16.791	20.4795	11.0183	20.3815	13.0636	8.01019	6.69985	5.24102	39.0386	42.0073	40.034	16.7654	9.46859	5.28838	52.2587	60.5962
Koike_CLKBMAL1_P1675	AR_G338	3_AR338	intron	3.17072	35.4356	3.70847	27.3518	1.21174	8.21867	Mapkap1	9.333	9.131	8.358	8.218	8.052	8.624	7.662	9.426	7.105	6.881	7.663	8.171	9.558	8.686	7.149	7.088	7.021	8.92	8.1	8.338	7.662	7.664	7.78	9.172	1.38676	17.6293	32.5117	13.514	3.69701	5.21099	2.29078	31.0307	19.0942	17.1947	13.4123	4.11262	7.93257	17.4196	30.2981
Koike_CLKBMAL1_P1687	AR_G339	3_AR339	intron	3.82864	70.186	4.62027	19.4881	7.24122	11.9923	Gna12	8.95	15.621	18.318	17.689	10.179	10.765	11.777	14.003	8.888	11.193	7.258	9.266	29.719	42.772	36.075	31.783	30.5	32.157	28.545	43.55	32.891	35.256	29.86	32.078	7.73594	14.3238	14.8476	10.8112	13.1449	3.72214	5.15424	51.0504	42.0073	50.1945	20.1184	15.781	26.4419	17.4196	7.57453
Koike_CLKBMAL1_P1688	AR_G340	3_AR340	TSS	4.33438	16.9092	2.54916	14.073	9.34389	4.05526	P2ry2	3.826	5.648	6.213	5.094	3.719	3.884	2.93	3.323	2.362	5.151	3.608	2.905	3.916	4.426	4.852	2.886	3.778	2.161	3.195	4.753	4.243	1.256	3.29	3.073	6.53053	23.3054	17.0464	9.24141	5.30278	3.85749	1.73544	18.0178	22.913	36.9946	16.1557	3.96916	2.64419	17.4196	44.2995
Koike_CLKBMAL1_P1690	AR_G341	3_AR341	intergenic-10kbless	2.39827	33.7641	5.0779	18.6027	4.38471	6.49003	Tm4sf4	2.5	9.204	7.166	5.698	7.92	7.778	6.803	9.171	7.057	5.391	1.81	7.381	22.399	28.247	25.574	33.253	23.885	30.973	23.893	30.467	23.963	25.616	23.226	25.009	10.5666	11.0183	17.1946	13.9645	9.54128	4.46656	5.15424	33.0326	19.0942	14.6762	20.1184	11.0467	18.5093	34.8392	22.7236
Koike_CLKBMAL1_P1695	AR_G342	3_AR342	intron	8.25193	45.087	3.16093	16.3862	9.5416	4.05962	Smad7	5.023	5.558	3.026	5.906	5.617	2.956	2.215	5.654	1.846	6.566	2.431	1.917	2.431	1.845	1.127	1.191	1.74	1.987	1.087	1.591	1.765	1.058	1.886	1.11	0.99988	17.8296	8.96788	8.29952	10.8483	5.03052	2.86347	27.0267	22.2187	46.1129	39.6272	10.8076	20.0317	17.4196	22.7236
Koike_CLKBMAL1_P1698	AR_G343	3_AR343	TSS	23.3984	44.1148	3.20629	14.5622	4.12228	3.95518	Cdk7	3.163	5.321	4.255	2.333	3.467	4.802	3.986	3.731	7.051	2.801	2.265	4.288	6.377	4.239	4.162	5.108	3.519	4.085	5.359	4.991	4.561	4.202	3.459	4.487	4.06034	9.91647	12.2289	6.75701	5.54552	2.23328	7.47973	41.8595	19.0942	14.3289	23.4715	9.46859	29.0861	52.2588	22.7236
Koike_CLKBMAL1_P1707	AR_G344	3_AR344	intron	1.8043	33.8069	4.80492	18.1625	5.68723	4.11461	Dsp	3.787	4.964	4.813	3.932	4.244	3.14	3.722	6.898	3.583	3.413	4.359	2.521	7.692	10.143	8.391	9.702	9.624	12.285	8.739	10.695	6.135	9.921	11.138	10.831	20.5864	23.1384	8.96788	17.227	12.006	5.07564	1.14539	42.0415	26.7319	17.1947	23.4715	4.73429	15.8651	17.4196	7.57453
Koike_CLKBMAL1_P1720	AR_G345	3_AR345	intron	6.08168	31.54	6.44899	17.5484	7.8258	11.0084	Frmd4b	7.189	10.63	10.798	14.014	9.584	13.147	10.552	12.565	13.907	11.538	5.441	12.736	4.241	7.973	4.789	7.603	3.937	5.718	3.386	5.094	6.277	6.71	5.446	6.44	12.1615	4.40732	16.3052	17.1178	7.39402	3.72214	2.29078	6.00593	35.0639	25.792	13.4123	7.12535	7.93257	0	0
Koike_CLKBMAL1_P1721	AR_G346	3_AR346	exon	4.21676	41.7777	2.90901	18.8465	4.70675	9.56797	Arid2	8.285	10.553	10.105	8.116	7.512	10.392	9.991	11.136	12.477	9.69	6.752	9.807	2.358	3.19	2.662	2.206	2.543	2.455	2.613	2.775	2.787	2.144	2.967	2.512	5.54532	18.7311	19.5663	11.2617	5.37747	2.97771	3.87002	24.0237	42.0073	18.7578	20.1184	13.8203	10.5768	34.8392	47.7425
Koike_CLKBMAL1_P1728	AR_G347	3_AR347	intron	9.44203	54.0128	6.69176	16.1003	9.58979	8.5589	Abl1	8.053	9.797	8.973	10.206	9.941	8.128	8.111	9.039	7.211	9.374	7.587	6.288	3.727	3.979	4.208	4.799	3.764	3.386	3.766	4.131	3.616	3.834	4.041	3.956	12.0653	11.252	8.96788	19.3701	8.01019	5.66216	4.00886	17.3808	26.7319	63.0471	57.0023	12.0988	26.4419	8.7098	15.1491
Koike_CLKBMAL1_P1729	AR_G348	3_AR348	intron	5.57666	54.8957	6.69563	20.3233	2.95193	14.1414	Lrp6	14.62	14.236	13.251	12.611	11.284	12.82	14.559	16.885	15.701	12.839	16.52	14.373	7.466	7.769	7.273	7.326	8.432	8.239	7.69	7.736	9.412	7.01	9.778	7.126	17.0111	13.222	12.2289	17.8276	14.1719	5.21099	4.28653	33.0326	42.0073	40.1209	26.8246	4.73429	7.93257	8.7098	7.57453
Koike_CLKBMAL1_P1731	AR_G349	3_AR349	intron	5.88337	45.7929	5.90161	18.4943	5.71805	16.0417	Gbe1	17.822	13.525	18.89	5.037	5.26	14.594	16.861	6.928	57.51	7.324	10.3	18.449	14.78	36.798	29.835	30.016	33.891	23.586	14.079	40.103	45.848	20.709	21.542	16.582	10.023	13.222	16.3052	13.9645	14.788	3.40632	2.29078	18.0178	53.4638	31.5235	36.8838	4.73429	15.8651	60.9685	15.1491
Koike_CLKBMAL1_P1733	AR_G350	3_AR350	intron	5.82787	71.8924	5.60227	17.2967	21.7011	123.08	G6pc	112.351	86.707	57.043	215.194	43.515	206.922	119.047	149.028	118.834	52.256	38.32	277.746	106.526	70.123	117.581	122.546	152.605	193.304	154.44	64.954	136.342	96.57	146.377	123.856	19.8354	14.3238	13.3159	14.4559	10.4935	6.69985	2.86347	27.0267	49.6449	68.7786	20.1184	6.50368	26.1214	29.8245	30.2981
Koike_CLKBMAL1_P1735	AR_G351	3_AR351	TSS	7.38791	42.6632	5.66524	12.8864	4.81748	6.60547	Dis3l2	6.496	7.316	8.186	8.219	5.589	6.253	7.823	7.055	7.401	4.528	4.357	6.041	2.612	2.771	2.708	1.819	1.581	1.938	2.993	2.94	2.84	2.2	2.596	2.956	4.87229	11.0183	19.5663	15.3159	6.32973	6.69985	2.11723	36.0356	26.7319	58.0103	33.5307	9.56423	24.9996	8.7098	5.9678
Koike_CLKBMAL1_P1738	AR_G352	3_AR352	intron	4.02601	40.9151	4.27121	15.2596	5.96877	9.2512	Fech	6.756	9.519	9.985	9.261	7.61	8.998	10.031	12.656	9.659	10.79	6.503	9.246	34.845	42.368	41.229	36.431	37.014	33.603	34.78	42.811	42.884	37.188	33.503	32.68	8.7475	13.222	24.4579	12.0125	4.92935	6.8352	2.86347	24.0237	38.1884	28.6578	16.1557	7.93831	19.7112	34.8392	7.57453
Koike_CLKBMAL1_P1742	AR_G353	3_AR353	TSS	4.10732	29.1589	2.42424	18.9602	5.86849	5.27107	Vps33a	4.982	6.822	5.789	6.166	5.001	4.277	5.519	5.39	4.043	5.045	5.151	5.067	7.197	5.413	6.39	5.873	6.149	7.255	7.554	5.739	5.7	5.355	6.029	6.565	23.8913	25.3421	17.1205	7.20748	3.69701	0.744427	0.572694	12.0119	34.3696	20.0604	4.06433	6.31239	7.93257	52.2587	37.8726
Koike_CLKBMAL1_P1751	AR_G354	3_AR354	intergenic-10kbless	6.62667	53.0925	3.68278	21.8387	3.80949	92.6539	Acaa1b	98.535	102.538	135.96	52.689	30.451	116.416	147.723	50.127	196.875	63.126	18.3	99.106	98.342	630.941	345.072	216.455	463.354	309.834	119.045	623.4	741.13	197.347	299.905	196.199	8.97064	23.1384	19.0475	11.2071	10.979	5.88774	1.71808	48.5025	32.8652	48.7182	33.5307	20.2762	13.5415	34.8392	58.0714
Koike_CLKBMAL1_P1755	AR_G355	3_AR355	intron	5.10903	47.6416	5.28178	20.6987	0.168226	11.7863	Cdh2	12.087	15.015	12.085	10.06	7.073	12.91	12.662	11.412	10.947	8.384	12.057	16.744	14.789	17.439	14.462	16.947	16.407	18.691	16.237	16.387	16.169	15.75	16.484	18.266	21.5179	13.3221	14.6747	14.8654	8.62636	4.46656	2.98495	27.0267	30.5507	22.9262	20.1184	15.3028	10.5768	0	7.57453
Koike_CLKBMAL1_P1759	AR_G356	3_AR356	intergenic-10kbless	7.91068	66.9222	4.6461	17.6886	8.82398	14.6511	Hs6st1	14.261	16.086	18.732	21.531	16.35	14.01	14.811	14.907	10.538	15.29	9.966	9.332	26.872	30.353	36.632	31.136	30.327	25.75	32.164	32.186	36.356	29.321	22.031	35.951	8.40405	12.1201	18.751	16.2168	6.16169	5.21099	4.58155	63.0623	33.791	34.3893	60.3553	15.781	29.0861	60.9685	53.0217
Koike_CLKBMAL1_P1767	AR_G357	3_AR357	intergenic-10kbless	6.85587	40.6289	6.51835	17.0767	14.4846	6.57265	Rabggta	4.782	7.004	5.221	6.486	8.296	7.097	7.313	5.448	6.572	8.66	6.252	5.742	4.736	5.492	5.367	8.364	5.33	5.664	4.338	7.097	6.28	7.088	6.028	5.463	13.0578	9.91647	12.2289	20.6123	13.2756	4.46656	5.69223	33.0326	30.5507	50.8892	32.2098	20.5153	19.3106	26.1294	7.57453
Koike_CLKBMAL1_P1774	AR_G358	3_AR358	intergenic-10kbless	7.58178	56.6422	4.82861	18.9221	11.8607	2.83393	Rcc2	2.901	2.642	3.192	4.154	3.628	1.777	2.299	2.636	0.856	6.223	1.702	1.994	4.902	3.75	3.385	4.2	3.46	4.929	5.94	4.232	3.927	4.972	4.485	4.925	23.5838	14.3238	16.3052	12.6131	9.2612	6.69985	2.29078	22.2038	38.1884	37.2551	40.2369	12.6248	10.5768	34.8392	22.7235
Koike_CLKBMAL1_P1778	AR_G359	3_AR359	intron	6.80537	32.3541	5.68947	12.8853	15.3715	7.01391	1810008A18Rik	7.827	6.916	5.766	9.3	10.062	6.864	6.756	6.629	3.651	8.999	6.266	5.132	7.915	8.037	7.895	9.647	7.621	7.725	7.701	6.869	6.523	8.522	6.586	8.473	16.3652	8.81464	13.0442	12.8724	5.65755	5.21099	2.86347	15.0148	11.4565	45.8524	3.35307	11.0467	7.93257	17.4196	37.8726
Koike_CLKBMAL1_P1780	AR_G360	3_AR360	intron	5.30102	39.8279	4.73812	19.8762	2.15258	3.30866	Rell1	3.575	3.757	3.591	3.213	3.132	3.547	3.121	6.192	1.637	2.313	2.613	3.012	4.217	3.006	2.18	2.658	2.95	2.872	3.72	2.527	2.852	3.006	3.125	3.116	0.15904	14.3238	13.1183	10.8112	10.4749	4.46656	4.00886	30.0297	22.913	34.3893	23.4715	0	18.5093	26.1294	15.1491
Koike_CLKBMAL1_P1781	AR_G361	3_AR361	intron	3.36068	42.9461	4.28383	13.2306	15.029	13.087	Klf3	12.035	12.876	11.283	21.22	13.515	16.912	12.511	11.214	9.326	15.175	7.799	13.179	3.855	4.487	4.185	5.868	4.521	5	4.11	5.2	5.949	5.381	4.576	5.163	13.3816	18.3972	15.49	12.108	6.59114	5.16587	0.711529	33.0326	38.1884	20.0604	49.1784	12.6248	27.6438	75.221	60.5962
Koike_CLKBMAL1_P1782	AR_G362	3_AR362	intron	4.3911	29.2715	3.27478	10.6537	1.93045	11.4242	Derl2	10.611	9.318	11.597	6.394	11.348	13.836	15.041	9.233	20.15	9.254	7.284	13.025	14.781	20.051	15.306	19.45	15.806	19.81	16.487	18.787	19.5	15.923	15.32	17.65	7.07829	15.3254	12.2289	10.5246	9.24253	5.21099	4.00886	18.0178	42.0073	28.6578	13.4123	8.75127	15.8651	69.6783	22.7235
Koike_CLKBMAL1_P1787	AR_G363	3_AR363	TSS	2.01125	16.2619	3.30011	14.5897	3.35157	7.34493	2610101N10Rik	5.972	6.836	7.009	4.932	5.693	7.457	8.13	8.739	10.968	6.692	6.641	9.072	5.125	4.334	3.837	5.051	4.144	4.547	4.756	4.77	4.271	3.969	4.935	5.686	23.1193	23.5057	28.2624	12.3537	6.3484	4.21842	2.86347	36.0356	25.3432	20.0604	16.7654	6.69496	18.5093	43.5489	30.2981
Koike_CLKBMAL1_P1791	AR_G364	3_AR364	intron	10.004	15.6167	6.66896	10.8393	1.25788	6.06897	Zfp750	5.324	7.167	5.113	5.724	7.056	7.404	6.131	7.173	4.827	7.647	3.675	5.587	3.833	2.78	2.174	2.598	3.659	3.559	2.7	2.849	2.682	2.629	3.52	2.608	21.7059	6.97825	13.0442	14.1283	5.80692	5.95542	1.71808	15.0148	13.1924	31.5235	16.7654	9.61205	7.93257	0	12.6242
Koike_CLKBMAL1_P1792	AR_G365	3_AR365	intron	1.44792	41.0649	5.44378	19.865	4.58687	29.3679	Ppap2b	26.634	37.885	47.42	20.764	23.246	31.763	37.524	21.596	31.917	33.525	9.603	30.537	30.94	57.328	47.56	39.849	42.175	41.728	28.37	52.229	48.514	36.323	47.931	37.989	9.7522	11.0183	23.6426	13.6096	9.24253	10.7829	1.71808	36.0356	17.2426	22.9262	20.1184	9.46859	18.5093	52.2587	45.4471
Koike_CLKBMAL1_P1794	AR_G366	3_AR366	TSS	4.6004	35.6843	3.21172	10.0579	2.83662	7.13308	Zfp62	6.221	6.885	7.58	5.776	6.308	7.518	8.89	8.074	9.392	5.631	5.448	7.872	3.539	3.297	2.96	3.784	3.334	3.528	3.756	3.533	3.011	3.24	3.59	3.821	22.374	14.3238	12.4266	9.78743	3.69701	2.97771	3.87002	45.0445	49.6449	25.792	20.1184	11.0467	7.93257	34.8392	0
Koike_CLKBMAL1_P1796	AR_G367	3_AR367	TSS	0.746203	31.0014	1.60522	14.2235	6.59712	6.39673	Cnot4	5.27	5.841	7.087	6.286	4.956	6.516	6.459	6.671	9.874	5.998	4.748	7.055	2.573	1.689	2.012	2.315	2.069	1.921	1.917	2.242	2.006	1.525	1.397	1.69	5.20269	14.3238	15.49	5.02339	3.08084	6.69985	5.15424	41.4956	15.2754	8.59733	13.4123	3.1562	13.2209	26.1294	30.2981
Koike_CLKBMAL1_P1797	AR_G368	3_AR368	intron	5.34175	45.3228	5.20915	19.1427	20.6278	7.32673	Sc4mol	3.379	4.296	8.495	3.637	3.712	23.307	8.358	5.279	7.866	8.625	2.786	8.181	21.973	30.222	22.193	29.886	13.766	32.095	21.916	28.502	20.033	46.627	20.027	20.956	11.3574	13.222	15.49	14.8654	11.4271	5.66216	2.86347	27.0267	42.0073	40.2945	26.8246	11.0467	15.8651	17.4196	15.1491
Koike_CLKBMAL1_P1799	AR_G369	3_AR369	intron	3.58887	30.9565	3.4976	19.1685	4.51979	16.032	Lrpprc	14.886	17.672	15.728	11.716	13.866	17.268	18.174	14.479	24.845	16.178	11.487	16.085	16.302	16.948	17.524	17.293	13.919	15.305	15.986	15.662	16.547	18.517	16.918	15.229	10.9174	20.9348	18.6275	11.7804	5.91895	7.44427	4.35594	24.0237	26.7319	17.1947	20.1184	2.10413	13.2209	34.8392	7.57453
Koike_CLKBMAL1_P1801	AR_G370	3_AR370	intron	3.49531	24.5429	6.253	10.6363	12.9827	10.2275	Slc25a39	9.348	10.828	9.305	11.177	9.682	10.57	9.859	8.844	8.426	15.694	9.318	9.677	122.024	115.556	124.053	123.778	126.352	107.213	102.926	121.317	135.833	124.146	123.669	110.146	12.2268	8.81464	9.78314	11.2617	8.62636	3.20329	1.71808	27.0267	15.2754	34.3893	20.1184	15.6375	13.2209	26.1294	7.57453
Koike_CLKBMAL1_P1805	AR_G371	3_AR371	intron	4.06056	31.0688	4.46322	14.0566	20.7136	9.23958	Eif4g3	10.137	11.035	7.727	10.775	10.297	7.208	10.955	8.88	6.552	9.722	9.993	7.594	4.043	4.066	3.504	4.464	4.037	4.502	3.994	3.638	4.111	3.849	4.122	4.986	20.8081	13.8897	17.5652	17.1178	3.08084	2.97771	3.43616	18.0178	34.1381	14.5894	20.1184	14.2985	13.2209	39.59	22.7236
Koike_CLKBMAL1_P1810	AR_G372	3_AR372	intron	7.12642	81.4971	3.0403	18.6373	5.88864	24.369	Chdh	25.685	27.551	29.139	29.553	25.406	23.38	28.492	25.992	19.709	21.715	21.697	14.109	20.6	38.153	28.065	23.971	34.306	24.155	22.521	38.94	33.681	27.42	30.445	23.794	9.44508	26.0766	20.9498	12.6131	10.6616	2.97771	5.57075	36.0356	61.1015	81.8917	70.1097	16.7852	44.9512	69.6783	30.2981
Koike_CLKBMAL1_P1811	AR_G373	3_AR373	intron	23.0473	66.5289	2.9339	12.684	21.0555	4.26659	Fdft1	3.095	3.778	4.266	3.021	4.832	10.206	4.837	3.935	3.297	4.207	1.436	4.29	14.219	23.943	14.689	19.99	15.552	21.882	14.193	22.024	16.604	28.665	20.223	18.923	13.7838	17.6293	12.2289	8.44968	5.54552	2.09793	1.71808	60.0593	22.913	25.792	26.8246	26.8277	31.7303	34.8392	7.57453
Koike_CLKBMAL1_P1813	AR_G374	3_AR374	TSS	7.11638	71.1082	5.0105	23.0465	13.5056	299.112	Pck1	49.32	229.588	142.603	630.396	162.859	232.604	79.639	376.56	137.485	654.68	327.329	566.278	152.497	119.495	195.432	216.98	145.211	161.69	192.636	101.735	296.061	152.002	145.236	222.79	12.9136	23.1384	22.5556	22.578	15.4976	5.95542	1.71808	48.7755	48.7192	94.0496	55.9862	14.2507	16.5062	60.9686	30.2981
Koike_CLKBMAL1_P1816	AR_G375	3_AR375	intron	3.75079	67.7636	3.61606	13.5067	2.83041	6.82971	Aatf	6.113	7.918	8.197	5.606	8.323	7.233	7.716	7.319	5.558	7.119	4.283	6.571	2.804	3.705	3.795	3.262	2.968	2.601	2.366	3.839	2.651	2.666	3.359	2.547	9.34224	18.3304	20.5298	11.562	8.62636	2.30096	2.86347	72.0712	87.8333	59.1392	50.2961	20.6109	31.7303	49.8834	53.0217
Koike_CLKBMAL1_P1818	AR_G376	3_AR376	intron	6.44282	73.7671	4.35273	24.585	6.86896	5.98232	Arhgef3	4.85	6.57	8.257	6.872	4.43	6.415	6.543	6.093	6.167	6.988	3.478	5.125	6.014	7.365	5.63	6.488	5.509	6.614	5.39	7.592	7.07	6.914	5.619	6.539	7.81332	22.0032	13.0442	19.7523	9.24253	7.03822	5.15424	37.7646	34.3696	63.0471	43.4884	19.4632	29.0861	34.8392	60.5962
Koike_CLKBMAL1_P1819	AR_G377	3_AR377	intron	6.16404	43.7822	3.78332	19.5987	1.92783	5.86221	Ywhae	7.222	6.507	5.495	5.929	4.612	6.388	4.987	6.308	5.001	6.784	5.224	5.89	79.514	77.704	80.682	84.931	75.42	83.15	75.487	82.426	84.387	79.443	78.194	81.803	11.1376	14.3238	15.49	13.514	7.39402	5.21099	4.00886	24.0237	38.1884	28.6578	20.1184	12.6248	0	34.8392	7.57453
Koike_CLKBMAL1_P1832	AR_G378	3_AR378	intron	8.21573	37.6327	9.15127	11.3331	18.8735	6.88239	Slc35b1	9.811	3.817	4.787	5.478	14.785	7.28	10.773	2.428	5.371	7.734	3.603	6.722	24.49	16.039	15.883	20.626	18.242	23.648	25.324	16.117	22.213	24.379	19.485	30.874	21.8834	6.61098	4.07631	14.647	9.41057	5.21099	2.29078	12.0119	22.913	23.7946	23.4715	11.5249	15.8651	8.7098	8.72218
Koike_CLKBMAL1_P1835	AR_G379	3_AR379	intergenic-10kbless	5.43397	49.7592	7.9185	15.1969	1.44988	7.56484	Actr8	8.299	7.368	6.788	8.306	6.488	7.263	9.151	8.614	6.029	8.523	7.177	6.771	6.088	6.386	6.051	5.387	5.337	6.173	6.164	7.085	5.653	5.953	6.425	6.374	3.26134	6.61098	13.8595	16.094	11.091	7.44427	5.15424	18.0178	68.7391	31.5235	30.1777	8.41652	13.2209	52.2587	30.2981
Koike_CLKBMAL1_P1845	AR_G380	3_AR380	intron	7.45672	46.199	5.65297	19.1532	14.7233	27.2594	Clu	29.159	21.015	19.526	38.35	25.159	22.787	32.337	23.37	23.818	31.758	40.722	19.112	747.282	396.348	504.988	537.743	508.246	535.968	733.639	417.909	428.215	587.32	517.516	677.426	22.8334	13.222	17.1205	17.1178	10.4749	5.45913	4.58155	24.0237	30.5507	39.8603	37.2902	6.31239	9.85562	78.3881	37.8726
Koike_CLKBMAL1_P1846	AR_G381	3_AR381	TSS	7.63776	18.789	3.8335	11.3913	22.8095	6.56495	Rnf149	6.16	7.403	4.957	6.673	6.53	6.902	7.694	6.482	6.274	7.313	5.676	6.715	30.268	25.987	27.565	30.653	22.941	32.546	26.88	26.145	28.696	25.08	23.859	27.005	3.14419	16.3939	16.7499	9.45982	8.01019	4.46656	2.16929	21.0208	15.2754	11.4631	30.1777	11.0467	6.65054	22.1704	7.57453
Koike_CLKBMAL1_P1852	AR_G382	3_AR382	intron	3.54243	58.4104	5.69619	22.8463	3.09878	17.0203	Adcy9	16.735	24.585	16.979	17.466	16.037	15.868	19.462	24.602	12.013	12.865	14.366	13.267	3.513	4.25	3.491	3.059	3.072	3.525	4.423	4.348	3.382	3.074	3.544	3.656	3.74576	18.5642	15.4653	13.9645	11.5765	13.129	1.92633	51.0504	48.7192	28.6578	33.3275	17.3591	15.8651	34.8392	58.76
Koike_CLKBMAL1_P1858	AR_G383	3_AR383	intron	5.95044	24.1756	3.88828	14.2126	14.7036	10.645	Ncor2	9.934	9.504	7	14.046	14.851	8.18	10.455	10.952	5.34	15.117	15.877	6.484	3.91	2.489	3.729	3.841	2.948	2.921	3.929	2.772	2.791	4.945	3.658	3.777	16.7169	16.5274	10.5984	10.6201	7.39402	2.23328	2.29078	9.0089	26.7319	20.0604	13.4123	4.73429	7.93257	17.4196	30.2981
Koike_CLKBMAL1_P1859	AR_G384	3_AR384	intron	5.27696	46.9483	4.52156	18.9333	22.145	7.17121	Rin3	7.501	9.054	7.641	6.959	8.524	9.064	7.419	6.794	3.985	7.397	5.798	5.92	4.028	4.385	4.298	4.979	4.861	4.999	4.58	4.685	3.936	4.451	4.571	4.087	18.0828	14.3238	21.1968	9.14585	11.8006	2.97771	3.43616	24.0237	35.874	31.6104	27.4342	14.8246	26.4419	26.1294	12.8537
Koike_CLKBMAL1_P1864	AR_G385	3_AR385	intron	2.4102	30.4155	2.32456	9.65912	23.3065	31.1072	1300001I01Rik	35.958	32.464	19.146	29.981	27.894	37.302	46.189	38.311	19.342	33.911	24.352	28.437	42.529	41.922	32.455	36.265	44.602	48.104	43.137	39.479	38.485	38.69	45.134	46.577	22.236	15.4256	13.0442	6.29289	6.16169	3.72214	4.58155	34.6706	42.0073	25.792	16.7654	12.6248	21.1535	34.8392	22.7236
Koike_CLKBMAL1_P1865	AR_G386	3_AR386	intron	3.61441	51.6321	4.28123	22.2648	5.88864	24.369	Chdh	25.685	27.551	29.139	29.553	25.406	23.38	28.492	25.992	19.709	21.715	21.697	14.109	20.6	38.153	28.065	23.971	34.306	24.155	22.521	38.94	33.681	27.42	30.445	23.794	9.44508	17.8296	20.258	13.514	9.55995	8.1887	5.15424	57.0564	20.5986	51.1498	16.7654	12.3857	16.3459	26.1294	45.4472
Koike_CLKBMAL1_P1869	AR_G387	3_AR387	TSS	8.46212	33.8969	4.06811	20.9557	1.67657	6.80889	Agbl5	7.179	7.176	6.727	7.079	8.573	7.066	7.824	8.266	5.367	6.079	5.136	5.235	2.672	2.373	2.091	2.282	1.636	2.429	2.669	2.388	2.293	2.528	1.856	2.358	3.9167	17.6293	11.4137	12.1626	11.5578	9.47453	6.19551	23.2047	19.0942	45.8524	32.1082	14.2029	15.8651	17.4196	60.5962
Koike_CLKBMAL1_P1883	AR_G388	3_AR388	intron	5.97216	37.4141	5.9922	12.9144	1.01043	8.13032	Atxn7l1	11.872	9.091	6.726	7.988	5.223	7.237	9.948	10.428	6.158	6.368	9.127	7.399	1.69	1.096	1.1	1.015	1.224	1.264	2.349	0.987	1.294	1.182	1.537	1.268	0.386279	14.3238	13.0442	11.7258	12.3234	2.97771	2.82876	36.3086	22.913	25.792	33.5307	15.781	14.6632	17.4196	22.7236
Koike_CLKBMAL1_P1884	AR_G389	3_AR389	intron	3.22719	41.6393	4.52318	14.53	12.963	8.38118	Lrrfip1	6.555	8.072	9.099	10.462	8.841	9.026	8.185	8.685	5.862	10.514	7.164	8.107	5.834	5.122	4.261	5.847	4.791	5.019	4.919	4.533	4.394	4.969	5.26	5.123	21.0988	14.3238	22.9014	12.6131	11.091	5.95542	2.55109	51.4144	38.1884	31.5235	16.7654	13.1986	13.2209	52.2587	22.7236
Koike_CLKBMAL1_P1886	AR_G390	3_AR390	TTS	3.18248	15.616	2.92456	19.0121	5.91566	94.9121	Apoe	84.605	99.569	121.978	98.896	85.564	73.689	129.167	112.229	92.771	124.317	38.336	77.825	6668.17	8769.87	8263.47	7570.8	8842.14	7976.9	6664.31	9338.53	9263.98	7800.18	8150.62	7763.69	10.891	27.1451	15.49	10.5655	7.39402	8.91057	2.88082	26.3897	37.4941	16.4999	20.1184	12.6726	23.6375	27.1851	7.57453
Koike_CLKBMAL1_P1895	AR_G391	3_AR391	intron	10.2934	27.3259	6.4719	14.9963	10.1129	6.95254	AK196141	5.26	5.727	9.623	12.237	6.628	5.391	6.573	9.462	2.889	10.027	4.853	4.761	7.193	7.235	4.28	4.758	6.933	6.058	5.939	5.404	6.417	6.658	4.304	7.224	0.97071	14.0233	10.5984	14.8654	13.6304	5.34634	3.43616	12.0119	0	34.3893	23.4715	9.46859	13.2209	43.5489	30.2981
Koike_CLKBMAL1_P1897	AR_G392	3_AR392	intron	5.5535	34.8296	6.61084	22.8202	4.73281	10.1812	Echs1	8.355	11.638	12.086	9.349	8.007	12.759	10.595	11.253	12.434	9.109	7.348	9.241	28.765	42.891	42.367	38.009	39.647	38.901	31.083	45.416	50.598	34.739	35.229	30.997	9.95152	16.9615	17.1205	25.4582	12.286	6.69985	4.58155	30.0297	27.4262	28.6578	31.8034	14.2029	10.5768	49.8834	23.4122
Koike_CLKBMAL1_P1898	AR_G393	3_AR393	intron	7.17988	30.2975	2.96165	20.3278	5.97369	5.45431	Bag4	4.222	4.802	7.601	4.605	3.395	5.383	5.611	7.241	7.542	5.444	3.979	5.628	7.042	9.861	7.903	7.181	8.818	7.009	6.809	10.3	8.72	7.137	7.505	6.937	7.92317	22.0366	22.6297	9.06395	8.01019	2.23328	4.63361	21.0208	11.4565	25.792	23.4715	6.31239	7.93257	17.4196	22.7236
Koike_CLKBMAL1_P1901	AR_G394	3_AR394	TSS	2.96472	36.8622	4.27995	16.7313	1.52831	10.0315	Elovl5	16.315	7.033	5.304	4.619	5.809	15.111	13.623	13.914	22.16	3.182	1.146	12.164	70.588	248.533	86.833	104.935	183.847	278.08	37.783	234.472	305.452	72.526	113.85	155.098	6.70755	11.0183	20.8756	11.4937	4.92935	2.97771	3.59235	27.0267	26.7319	17.1947	20.1184	1.5781	15.8651	43.549	15.1491
Koike_CLKBMAL1_P1908	AR_G395	3_AR395	TSS	7.9771	35.2606	8.5117	15.0723	23.8633	8.85547	Pelo	11.56	10.614	8.457	9.082	10.119	7.451	8.969	8.96	5.666	9.157	9.281	6.95	6.843	4.741	6.295	7.395	5.118	6.226	7.523	6.555	6.335	7.635	5.059	6.281	8.58489	6.61098	7.33736	16.2032	13.4063	4.73726	3.10643	15.0148	19.0942	37.2551	28.6535	12.6248	21.1535	34.8392	7.57453
Koike_CLKBMAL1_P1911	AR_G396	3_AR396	intron	9.14862	27.0707	6.23702	16.6076	1.17786	4.67525	1700001C19Rik	4.705	6.216	3.583	4.717	6.159	5.592	4.302	8.237	2.557	3.514	1.599	4.922	3.695	8.029	3.193	2.674	2.976	2.66	4.405	7.088	4.159	2.228	4.409	4.746	4.87726	22.0032	28.4106	25.3354	16.6552	8.68498	2.9676	42.6785	27.1948	58.1839	47.1463	11.9075	22.5157	17.4196	7.57453
Koike_CLKBMAL1_P1917	AR_G397	3_AR397	TSS	3.47599	48.2813	3.39362	19.4905	17.747	12.2012	Ap3d1	11.62	12.024	10.685	12.104	14.482	12.626	14.636	13.156	7.654	17.064	9.989	10.374	8.506	7.323	6.78	9.34	7.836	9.198	8.388	7.861	8.265	8.347	8.44	8.777	20.1381	15.4256	18.1828	8.74999	5.75091	8.1887	2.86347	54.0534	33.6752	25.792	30.1777	11.0467	15.8651	115.339	30.2981
Koike_CLKBMAL1_P1919	AR_G398	3_AR398	intron	4.08874	46.4762	3.201	14.0636	9.33584	5.84879	Dnmt3a	5.228	6.259	8.421	7.802	6.51	4.504	5.299	6.391	4.242	6.714	5.076	3.74	2.013	1.328	1.259	1.535	1.157	1.139	1.496	1.52	1.077	1.424	1.685	1.386	1.08311	15.4256	19.5663	8.51793	1.77382	3.72214	1.96104	24.0237	61.1015	28.6578	16.7654	7.89049	15.8651	5.54261	37.8726
Koike_CLKBMAL1_P1920	AR_G399	3_AR399	TSS	9.35588	78.865	6.17709	11.3326	3.01378	6.95107	Arid4a	6.695	6.962	6.062	7.799	6.381	7.019	8.326	7.191	6.749	8.062	5.031	7.135	2.374	2.422	2.1	2.274	2.413	2.67	2.587	2.493	2.135	2.263	2.399	1.694	1.84082	10.1502	11.5125	12.3128	8.01019	4.46656	2.29078	48.0475	51.1493	57.3155	73.7676	25.68	44.9512	130.647	37.8726
Koike_CLKBMAL1_P1929	AR_G400	3_AR400	intron	7.59286	43.7292	8.11255	15.9532	8.27274	8.20035	AK149394	3.426	8.521	15.671	8.373	6.841	9.754	4.899	8.952	11.706	7.666	4.267	8.329	3.634	6.814	5.865	7.456	6.722	6.509	1.806	8.173	7.609	4.876	7.287	4.463	12.5672	6.61098	9.78314	11.7122	15.4042	4.53424	4.58155	18.0178	28.352	26.6604	33.5307	9.46859	7.93257	69.6784	22.7236
Koike_CLKBMAL1_P1931	AR_G401	3_AR401	TSS	6.13891	26.4045	5.54519	12.7915	10.7607	6.38987	Fetub	4.47	4.344	7.452	8.153	4.353	3.942	7.362	5.895	9.275	5.714	9.98	5.737	128.711	121.877	150.148	146.389	131.82	114.297	114.225	137.856	107.791	168.16	154.76	145.486	15.0971	11.3856	14.6994	13.9645	6.77785	5.21099	3.22791	18.0178	26.7319	34.3893	24.2844	12.6248	17.8683	34.8392	39.7089
Koike_CLKBMAL1_P1941	AR_G402	3_AR402	TSS	5.17837	21.9557	3.49615	13.3818	20.6848	21.1346	P4hb	27.449	16.194	20.862	15.789	38.691	20.35	33.015	10.405	24.008	22.787	7.076	16.99	409.127	372.551	357.168	417.527	397.079	381.527	382.958	407.47	467.66	424.984	396.402	422.932	13.6615	14.5909	18.4052	8.10841	5.43349	2.23328	0.572694	24.0237	38.1884	20.0604	20.1184	6.31239	18.6696	52.7866	24.5598
Koike_CLKBMAL1_P1943	AR_G403	3_AR403	intron	4.80769	32.7315	3.43666	19.1718	20.1245	5.9543	Eif1a	4.859	5.786	5.166	4.483	9.366	6.322	6.085	6.333	4.66	5.466	3.492	9.434	23.474	16.047	16.278	24.559	16.317	21.824	20.929	14.311	16.927	23.623	19.074	26.16	20.2432	24.2403	17.2687	14.7972	10.3628	5.21099	1.38835	40.6766	49.6449	22.9262	18.5943	12.6248	13.2209	23.2261	30.2981
Koike_CLKBMAL1_P1945	AR_G404	3_AR404	intergenic-10kbless	6.68768	35.3988	8.77603	22.6909	11.9299	33.19	Gpt2	11.643	35.054	36.4	53.422	24.998	43.486	23.002	22.21	27.737	69.112	23.88	27.334	36.884	96.711	71.036	77.837	92.081	63.734	34.244	109.956	105.532	71.234	51.975	31.316	10.3333	13.222	13.2665	21.677	20.9497	5.52681	5.29308	25.6617	17.937	37.9498	24.6908	9.61205	5.28838	26.1294	3.90204
Koike_CLKBMAL1_P1946	AR_G405	3_AR405	intron	5.8526	22.4438	5.79656	15.4808	11.1268	8.79087	Cnn3	6.235	8.294	11.104	9.754	7.863	11.441	8.791	6.302	9.378	12.19	5.083	9.056	34.183	52.235	48.412	49.712	45.85	43.877	31.162	51.225	45.564	49.054	43.972	42.339	11.9135	13.222	10.5984	15.7254	10.979	6.69985	4.87657	12.0119	37.4941	31.5235	13.4123	9.99462	10.5768	8.70978	0
Koike_CLKBMAL1_P1948	AR_G406	3_AR406	intron	9.36053	40.0297	4.31384	15.3085	4.60476	4.25452	AK029023	4.737	5.264	6.373	2.792	3.525	4.133	4.378	3.719	5.899	3.511	2.558	4.167	2.372	3.574	3.19	3.256	3.987	4.322	2.658	4.636	4.769	2.523	3.152	2.825	9.38676	16.2269	21.1474	18.005	6.87121	3.33864	4.73774	36.3086	22.913	48.9787	57.5103	15.0637	27.5637	60.9685	55.0875
Koike_CLKBMAL1_P1949	AR_G407	3_AR407	TSS	3.44103	35.4264	4.46686	12.3596	6.53452	7.32552	Tmem126a	7.138	6.933	10.44	6.782	5.218	7.193	6.728	7.076	11.05	6.383	5.665	7.299	21.169	15.718	19.265	18.132	17.608	15.839	18.977	18.934	19.85	18.68	17.64	16.853	8.13279	12.454	10.5984	10.2788	7.39402	3.72214	1.71808	27.9367	45.8261	20.0604	23.4715	8.17742	15.8651	17.4196	37.8726
Koike_CLKBMAL1_P1951	AR_G408	3_AR408	TSS	3.60823	25.5665	2.315	12.9463	2.74683	15.9898	Asgr1	23.041	13.691	16.912	12.724	16.148	11.942	22.967	13.951	22.715	11.442	14.224	12.121	176.828	186.396	203.602	206.893	195.668	189.74	159	199.051	209.848	182.975	184.422	182.062	12.0387	18.7311	7.33736	7.79445	5.88161	2.97771	1.1801	24.1147	26.7319	25.792	22.9635	6.36021	13.7017	32.4638	22.7236
Koike_CLKBMAL1_P1953	AR_G409	3_AR409	intron	9.34964	41.0837	6.9491	17.4071	13.2836	39.6409	Hpn	34.955	37.546	38.709	47.737	44.944	42.06	41.256	39.388	28.616	52.122	41.422	26.936	102.745	93.721	95.644	90.349	88.088	85.22	92.2	97.225	91.912	96.675	97.405	94.606	5.95242	14.3238	13.0442	18.0733	16.0204	5.95542	3.43616	23.4777	26.7319	44.6366	57.0023	17.3591	2.64419	18.4753	22.7236
Koike_CLKBMAL1_P1954	AR_G410	3_AR410	intergenic-10kbless	5.09298	41.3741	3.88239	11.881	13.5189	43.5829	Hyal1	48.481	31.508	43.395	65.588	45.884	37.435	46.706	30.571	35.986	55.204	52.319	29.918	10.913	12.438	13.911	14.995	15.227	11.249	13.977	12.618	12.817	16.356	13.207	13.476	14.4942	18.7311	15.49	14.8654	7.39402	2.97771	1.71808	24.0237	53.4638	25.792	23.4715	9.61205	13.2209	0	31.9048
Koike_CLKBMAL1_P1966	AR_G411	3_AR411	intron	9.89311	44.7619	5.72444	16.4054	10.4694	10.4341	Osbpl1a	9.369	8.77	10.449	14.431	7.218	9.235	8.82	9.261	14.641	12.168	11.394	9.452	9.994	13.488	13.274	10.312	11.437	10.478	9.635	12.888	12.478	9.602	10.464	9.307	8.43362	16.3605	8.15262	18.4692	7.73011	5.21099	3.81796	17.1988	29.5092	44.8103	50.7025	12.6248	15.8651	0	15.1491
Koike_CLKBMAL1_P1972	AR_G412	3_AR412	TSS	2.63746	48.8364	3.47838	15.1425	10.3613	10.0557	Fnbp4	8.789	10.956	8.074	11.273	9.908	8.552	12.611	10.569	7.817	14.68	9.179	8.259	2.633	2.859	3.13	3.146	3.184	2.81	3.641	2.847	2.673	2.908	3.482	3.267	19.5623	18.3638	18.504	10.8112	6.16169	4.98541	2.29078	54.0534	45.8261	28.6578	20.1184	13.4856	15.8651	56.4817	68.1708
Koike_CLKBMAL1_P1973	AR_G413	3_AR413	intron	8.93132	48.421	7.16288	22.625	23.0797	5.80515	Etv6	8.438	5.657	4.528	5.385	7.174	4.92	7.169	6.114	5.022	4.563	5.828	4.863	3.749	3.303	3.926	3.537	3.326	3.829	3.561	2.92	3.073	3.438	3.477	4.542	21.559	12.8881	16.157	13.5004	14.5266	7.44427	5.15424	14.4688	30.5507	34.3893	46.943	8.89474	20.5926	32.9917	7.57453
Koike_CLKBMAL1_P1979	AR_G414	3_AR414	intergenic-10kbless	9.17935	41.5902	5.80355	19.0455	14.0464	9.13422	1100001G20Rik	5.814	5.976	12.198	9.041	14.541	9.182	10.249	5.467	10.111	10.202	7.042	9.787	553.774	338.911	391.528	364.895	389.229	327.046	523.766	331.674	317.395	359.921	390.848	544.441	23.8767	18.3638	9.80785	16.8311	10.8483	11.4822	3.74854	15.0148	30.5507	33.1735	46.1302	15.781	17.1472	26.1294	15.1491
Koike_CLKBMAL1_P1981	AR_G415	3_AR415	intron	6.81943	39.1298	3.38626	18.1885	9.90031	13.8887	Slc24a6	7.637	11.547	21.662	27.539	10.966	9.424	8.094	23.182	6.07	20.179	11.604	8.761	11.545	8.377	7.326	7.064	7.158	5.723	9.764	8.186	6.341	7.18	11.548	9.114	0.429073	21.5358	22.0862	14.0873	6.62848	3.58679	1.71808	12.0119	38.1884	37.6025	23.4715	10.5207	13.2209	34.8392	22.7236
Koike_CLKBMAL1_P1984	AR_G416	3_AR416	intron	4.45031	14.7476	4.35834	13.8566	8.07733	6.98988	Ctsd	6.472	6.959	8.702	6.622	5.64	7.495	7.787	5.538	7.476	7.97	6.579	6.636	98.683	120.454	104.706	104.012	101.534	105.417	99.7	122.149	131.533	98.888	104.44	97.989	8.16619	14.0567	15.07	11.9306	3.69701	1.48885	1.71808	18.0178	18.0527	25.9657	16.5622	4.73429	3.60571	17.4196	15.1491
Koike_CLKBMAL1_P1986	AR_G417	3_AR417	TSS	4.62446	34.1286	3.29124	13.5381	8.85705	5.69478	Exosc5	4.106	7.878	5.765	6.876	4.599	4.672	5.254	6.286	4.971	8.192	5.645	4.093	2.351	2.819	3.75	2.811	2.645	2.352	2.719	2.675	2.39	3.335	3.058	2.604	12.3019	15.2587	23.6426	8.13572	3.69701	4.03795	2.86347	30.0297	30.5507	34.3893	10.0592	4.44737	15.8651	8.7098	22.7236
Koike_CLKBMAL1_P1990	AR_G418	3_AR418	intron	4.62951	38.162	4.13257	16.2473	0.186324	62.782	F2	60.627	66.732	54.805	51.494	58.438	63.805	80.014	79.411	45.243	70.898	68.909	53.008	499.128	462.129	475.774	500.949	513.288	509.371	501.5	497.876	472.203	510.265	526.88	519.649	19.7229	13.222	13.0442	8.58618	9.09315	4.46656	2.86347	12.0119	22.913	31.5235	10.0592	9.46859	23.7977	43.549	7.57453
Koike_CLKBMAL1_P1994	AR_G419	3_AR419	TSS	4.89202	44.1423	4.00717	13.1095	21.7574	8.26962	Lamp1	8.487	8.924	8.663	8.766	8.099	9.85	7.792	8.349	5.998	8.633	6.701	8.972	212.327	193.745	217.072	216.64	200.433	220.742	216.619	203.732	208.59	202.939	204.032	213.946	22.4553	11.9866	10.5984	10.8931	3.08084	2.23328	1.14539	36.0356	33.0966	25.792	26.8246	1.5781	7.93257	26.1294	7.57453
Koike_CLKBMAL1_P1995	AR_G420	3_AR420	TSS	8.57045	33.484	3.46164	16.0343	15.4363	8.8015	Alg11	6.944	7.63	6.464	6.202	7.877	7.43	10.896	7.572	11.23	11.939	11.591	9.843	6.204	6.938	9.126	9.263	9.103	9.361	6.464	8.737	7.397	8.254	9.299	6.188	14.8512	13.4557	17.9358	9.51442	6.32973	2.23328	2.86347	3.00297	22.913	37.2551	30.1777	5.30815	7.93257	52.2587	35.3478
Koike_CLKBMAL1_P1997	AR_G421	3_AR421	intron	2.71488	19.6336	5.78847	14.9657	12.4296	95.752	Apoa1	58.053	71.136	74.894	190.382	78.279	76.416	95.244	125.905	55.091	132.537	102.331	88.757	4355.72	2776.49	2931.85	3266.54	2652.75	2876.13	4440.61	2721.07	1966.39	3797.79	3312.37	3620.94	23.4724	12.1201	14.0818	16.5171	8.01019	5.21099	2.44696	26.9357	15.2754	25.792	2.94664	8.89474	15.3844	8.70978	34.2002
Koike_CLKBMAL1_P2001	AR_G422	3_AR422	intron	13.0062	22.3788	2.569	6.19938	10.4694	10.4341	Osbpl1a	9.369	8.77	10.449	14.431	7.218	9.235	8.82	9.261	14.641	12.168	11.394	9.452	9.994	13.488	13.274	10.312	11.437	10.478	9.635	12.888	12.478	9.602	10.464	9.307	8.43362	15.4256	7.46088	9.70553	5.13474	6.69985	0.885072	9.0089	11.4565	37.2551	13.4123	14.3942	24.6791	26.1294	7.57453
Koike_CLKBMAL1_P2003	AR_G423	3_AR423	intron	5.35717	46.4077	6.9286	16.9514	17.4228	5.29668	Tram1	6.163	3.123	5.237	4.908	7.593	4.994	6.686	3.109	6.329	6.04	3.173	6.205	45.585	32.717	32.822	42.018	30.603	36.254	41.157	31.39	35.015	41.77	36.425	50.295	22.005	13.5892	15.49	17.732	9.24253	15.633	4.00886	39.0386	49.6449	34.3893	50.2961	12.6248	18.5093	52.2587	22.7236
Koike_CLKBMAL1_P2011	AR_G424	3_AR424	TSS	7.26681	28.9904	2.30553	17.228	1.01043	8.13032	Atxn7l1	11.872	9.091	6.726	7.988	5.223	7.237	9.948	10.428	6.158	6.368	9.127	7.399	1.69	1.096	1.1	1.015	1.224	1.264	2.349	0.987	1.294	1.182	1.537	1.268	0.386279	20.9348	11.8831	10.8112	6.77785	5.95542	2.86347	30.0297	22.913	17.1947	26.8246	9.46859	5.28838	26.1294	30.2981
Koike_CLKBMAL1_P2016	AR_G425	3_AR425	intron	8.90282	46.4521	7.64142	16.0996	0.859023	6.71308	Sec13	7.204	6.837	5.663	7.095	6.746	6.847	6.631	6.453	6.474	8.781	4.473	7.354	23.501	21.188	19.923	26.246	20.513	22.47	22.973	21.441	24.157	22.763	18.92	25.792	23.5667	7.97992	10.5984	12.108	9.8587	7.44427	3.33204	15.0148	22.913	42.9866	46.943	8.94256	10.5768	26.1294	30.2981
Koike_CLKBMAL1_P2017	AR_G426	3_AR426	intron	1.7129	40.4486	3.87399	13.8872	10.3777	15.6519	Hebp1	11.658	15.286	16.235	22.427	15.404	16.503	17.231	19.177	9.665	21.073	11.936	11.228	89.701	101.941	102.93	90.966	96.11	101.929	87.715	115.227	102.031	97.523	92.758	97.484	7.96052	14.8246	13.8595	9.81473	8.01019	3.72214	3.34939	39.0386	34.3696	31.5235	10.0592	9.46859	21.1535	127.216	68.1707
Koike_CLKBMAL1_P2018	AR_G427	3_AR427	TSS	2.85892	82.9073	2.92712	15.5729	3.4054	6.11702	Gtl3	5.249	5.716	7.928	4.242	4.873	7.992	6.507	6.568	7.669	6.014	3.669	6.976	4.921	7.66	4.377	6.269	5.476	5.887	5.637	6.803	5.467	4.876	6.814	4.672	5.72229	17.6293	10.5984	8.87284	4.31318	2.97771	1.71808	63.0623	45.8261	36.0393	43.59	14.6333	32.4514	60.9685	22.7236
Koike_CLKBMAL1_P2021	AR_G428	3_AR428	intron	2.02022	67.1099	3.21782	24.4356	17.9388	12.64	Txndc11	15.041	10.413	10.822	13.671	18.526	12.855	14.688	8.189	14.445	11.457	9.346	12.228	3.723	3.146	2.901	3.429	2.51	2.654	3.378	2.932	2.975	3.923	2.457	3.501	5.89055	17.6293	23.6426	13.5413	9.20518	8.61731	7.63592	45.0445	34.3696	34.3893	30.6857	24.2931	31.7303	52.2588	30.2981
Koike_CLKBMAL1_P2027	AR_G429	3_AR429	intron	4.80442	35.74	6.1299	13.0131	0.191062	4.97457	Ptprj	5.613	4.563	5.145	3.977	4.173	6.003	5.997	5.702	4.866	3.795	5.676	4.185	7.002	8.318	7.965	8.248	8.45	9.61	6.996	8.476	7.636	7.605	9.584	8.84	18.8985	4.40732	13.0442	13.4185	7.33801	2.97771	5.15424	39.0386	18.8628	37.2551	23.0651	12.3857	18.5093	52.2587	30.2981
Koike_CLKBMAL1_P2031	AR_G430	3_AR430	TTS	5.01568	32.7628	2.7819	12.2726	2.70563	4.99215	Phf2	4.455	6.364	4.224	5.667	5.101	4.687	5.989	6.485	3.068	5.335	4.434	4.095	3.295	3.642	2.656	3.563	3.346	3.647	3.337	3.779	3.258	3.453	3.598	3.592	22.343	17.2286	8.96788	8.83189	4.92935	3.72214	2.29078	24.0237	22.913	31.5235	20.1184	7.89049	15.8651	17.4196	7.57453
Koike_CLKBMAL1_P2033	AR_G431	3_AR431	intron	7.99413	78.395	4.29332	18.8017	20.7136	9.23958	Eif4g3	10.137	11.035	7.727	10.775	10.297	7.208	10.955	8.88	6.552	9.722	9.993	7.594	4.043	4.066	3.504	4.464	4.037	4.502	3.994	3.638	4.111	3.849	4.122	4.986	20.8081	18.4974	16.3052	13.9645	9.24253	5.95542	4.00886	24.0237	34.601	68.5181	46.943	12.4813	37.0187	50.1473	30.2981
Koike_CLKBMAL1_P2034	AR_G432	3_AR432	TSS	8.77305	22.4177	5.01468	12.4929	12.5637	8.52966	Brpf3	7.479	7.786	6.846	12.141	8.404	7.106	8.357	9.288	4.946	14.716	9.857	5.429	3.512	3.302	3.573	3.51	3.943	3.542	3.955	3.427	3.577	3.973	3.664	3.891	18.8455	13.7896	10.5984	11.7531	7.39402	4.46656	1.14539	15.0148	7.63768	22.9262	23.4715	0	7.93257	0	37.8726
Koike_CLKBMAL1_P2043	AR_G433	3_AR433	intron	8.97108	57.0654	6.14683	21.6159	20.6761	6.98426	Arid1b	7.555	7.279	6.862	8.03	6.869	6.889	7.653	6.455	6.033	6.793	7.13	6.262	1.942	2.323	1.817	1.764	1.99	2.054	2.191	1.799	1.742	1.874	1.891	2.366	0.188502	11.0183	17.1205	18.4009	11.0537	6.69985	1.14539	27.0267	34.3696	37.0814	53.6492	12.6248	10.5768	26.1294	0
Koike_CLKBMAL1_P2044	AR_G434	3_AR434	intron	8.64323	38.2916	7.40628	10.6278	6.28723	5.10562	Ndufb9	5.385	6.174	5.354	6.983	3.644	5.596	4.843	4.654	5.107	4.572	4.511	4.442	145.666	159.305	163.472	155.429	157.115	147.431	130.403	166.596	164.732	144.316	146.692	143.91	10.0876	8.81464	7.33736	14.2102	7.39402	6.04565	2.86347	21.3848	15.2754	51.1498	20.9313	14.2029	33.8136	17.4196	22.7236
Koike_CLKBMAL1_P2053	AR_G435	3_AR435	TSS	6.79091	60.0661	4.95027	12.4507	4.73281	10.1812	Echs1	8.355	11.638	12.086	9.349	8.007	12.759	10.595	11.253	12.434	9.109	7.348	9.241	28.765	42.891	42.367	38.009	39.647	38.901	31.083	45.416	50.598	34.739	35.229	30.997	9.95152	8.81464	13.2171	12.108	2.48335	2.97771	3.60971	27.0267	49.8764	45.8524	40.2369	11.0467	23.7977	43.549	30.2981
Koike_CLKBMAL1_P2055	AR_G436	3_AR436	TSS	6.64869	42.6858	5.65364	15.7645	18.7537	26.4157	Slc6a13	15.025	33.103	25.756	16.53	33.806	36.987	24.389	25.307	20.721	35.633	16.967	32.766	38.509	39.964	28.735	39.69	39.857	36.671	40.223	40.856	36.269	33.407	41.56	37.46	23.3076	9.91647	16.3052	11.3572	7.16996	4.46656	1.14539	30.3027	26.7319	14.3289	36.8838	3.1562	21.1535	34.8392	37.8726
Koike_CLKBMAL1_P2057	AR_G437	3_AR437	TSS	2.58746	27.7233	5.3221	14.1322	21.9841	7.31017	Ampd2	8.577	8.589	5.435	5.212	11.037	6.571	10.068	6.239	5.636	8.581	5.208	6.568	4.662	5.972	2.921	3.77	4.939	5.097	5.499	4.387	4.226	5.78	4.454	4.861	23.8274	8.81464	12.3525	10.3335	7.95418	6.13589	1.71808	35.8536	7.63768	22.9262	6.70615	17.3591	2.64419	17.4196	7.57453
Koike_CLKBMAL1_P2067	AR_G438	3_AR438	intron	2.92953	52.1485	4.0293	14.2394	10.9496	8.06089	Irf1	4.467	8.849	9.184	9.373	12.157	7.549	7.081	10.869	5.282	9.546	5.599	6.774	5.189	5.784	4.089	5.761	4.17	5.179	4.31	7.722	3.299	4.572	6.081	5.908	1.44816	12.8213	18.751	9.45982	7.56207	4.46656	2.86347	52.0514	42.0073	48.7182	28.2471	11.0467	26.4419	78.3881	37.8726
Koike_CLKBMAL1_P2071	AR_G439	3_AR439	intergenic-10kbless	3.4801	49.8665	6.3679	15.0285	18.3255	6.28853	Dnajb4	5.542	3.801	5.609	5.595	4.346	7.5	5.871	4.214	8.348	6.867	5.876	11.893	9.458	10.501	10.945	15.92	14.186	13.195	9.21	12.242	11.488	13.497	9.562	11.255	14.9555	12.1201	7.33736	15.7664	7.39402	5.48169	2.29078	36.6726	34.3696	41.5972	13.4123	9.46859	17.067	17.4196	15.1491
Koike_CLKBMAL1_P2075	AR_G440	3_AR440	intron	5.58172	30.5398	4.41098	14.7434	19.2518	7.32805	Mapkapk2	9.642	6.901	5.849	8.521	8.377	7.197	7.654	6.329	4.501	7.784	7.319	7.862	15.684	16.654	13.484	15.447	14.413	17.434	16.096	16.484	15.303	14.7	15.321	16.957	0.850189	8.81464	17.1205	7.11193	6.53512	6.69985	0.572694	24.0237	19.0942	14.3289	26.8246	3.49094	7.93257	17.4196	37.8726
Koike_CLKBMAL1_P2077	AR_G441	3_AR441	intron	4.71804	32.9387	5.01516	17.8354	8.27274	8.20035	AK149394	3.426	8.521	15.671	8.373	6.841	9.754	4.899	8.952	11.706	7.666	4.267	8.329	3.634	6.814	5.865	7.456	6.722	6.509	1.806	8.173	7.609	4.876	7.287	4.463	12.5672	8.81464	17.9358	14.3604	4.92935	8.1887	0.572694	24.0237	30.5507	40.1209	3.35307	1.5781	10.5768	8.7098	22.7236
Koike_CLKBMAL1_P2078	AR_G442	3_AR442	intron	6.91452	32.0025	8.2523	13.2841	15.7406	27.9466	Aass	28.319	19.231	15.54	47.19	16.677	31.58	27.414	26.133	24.742	25.625	50.024	22.881	48.948	49.338	63.714	53.347	57.103	48.969	44.354	52.091	54.955	56.115	53.746	49.399	12.8735	5.50915	8.99259	15.193	9.22386	5.21099	2.62051	6.00593	34.1381	11.4631	26.6214	6.45586	13.6216	8.7098	7.57453
Koike_CLKBMAL1_P2080	AR_G443	3_AR443	intron	20.5458	42.6043	6.17437	13.3479	23.2784	16.504	Agxt	11.886	15.912	3.922	13.83	15.285	31.452	18.957	44.89	2.571	6.071	5.226	28.047	81.124	70.925	62.767	115.133	54.861	73.893	84.513	72.266	45.961	58.094	62.518	82.164	23.8173	11.0183	13.0442	14.8518	8.79441	3.72214	2.06517	27.0267	26.7319	22.9262	33.5307	18.9372	29.0861	95.8077	22.7236
Koike_CLKBMAL1_P2085	AR_G444	3_AR444	intron	10.2886	26.4883	5.52816	18.5277	17.2738	13.0377	Atrnl1	10.957	16.168	13.474	12.841	12.445	13.094	11.635	13.491	11.234	12.068	15.041	14.003	5.476	3.799	5.033	4.991	4.508	4.612	5.313	3.821	4.211	5.634	5.119	5.733	19.5914	14.4907	15.49	13.0909	13.425	12.4974	6.29963	18.0178	24.6489	14.3289	36.8838	12.6248	13.2209	95.8078	53.0217
Koike_CLKBMAL1_P2088	AR_G445	3_AR445	intron	6.22467	36.8869	3.80351	17.6091	12.0489	8.91957	4933407C03Rik	6.037	8.413	11.323	10.749	10.089	10.271	6.958	7.811	6.431	15.128	7.37	6.455	3.475	4.142	3.544	4.278	3.691	4.87	3.292	4.408	4.539	5.137	3.703	3.535	12.6184	19.8329	24.4579	15.6435	9.22386	5.21099	2.29078	25.4797	30.5507	29.8735	26.9262	14.2029	18.5093	52.2588	30.2981
Koike_CLKBMAL1_P2090	AR_G446	3_AR446	intron	4.04633	27.0382	3.43889	19.8574	3.09878	17.0203	Adcy9	16.735	24.585	16.979	17.466	16.037	15.868	19.462	24.602	12.013	12.865	14.366	13.267	3.513	4.25	3.491	3.059	3.072	3.525	4.423	4.348	3.382	3.074	3.544	3.656	3.74576	17.6293	21.518	13.0636	3.69701	6.54194	2.29078	27.0267	22.913	25.792	13.4123	4.73429	7.93257	26.1294	15.1491
Koike_CLKBMAL1_P2102	AR_G447	3_AR447	intron	3.55727	43.7478	2.90065	14.5408	6.65816	6.10083	Zfp91	5.697	5.095	6.679	5.03	4.294	7.078	5.935	5.072	10.705	6.398	4.347	6.879	15.833	18.379	19.239	17.432	20.326	19.046	17.948	18.753	20.846	17.403	17.108	17.751	11.1847	19.8329	15.2676	11.4801	4.6306	3.72214	2.29078	42.0415	40.3871	17.1947	35.1565	5.6429	15.3844	43.549	22.7236
Koike_CLKBMAL1_P2113	AR_G448	3_AR448	TSS	5.73299	51.3915	3.61206	15.769	5.91566	94.9121	Apoe	84.605	99.569	121.978	98.896	85.564	73.689	129.167	112.229	92.771	124.317	38.336	77.825	6668.17	8769.87	8263.47	7570.8	8842.14	7976.9	6664.31	9338.53	9263.98	7800.18	8150.62	7763.69	10.891	15.4256	15.1194	12.4493	5.54552	4.26354	2.86347	27.0267	42.0073	59.4866	16.7654	15.781	22.9163	60.9686	33.0525
Koike_CLKBMAL1_P2119	AR_G449	3_AR449	intron	7.41274	46.4962	6.11484	20.4203	22.4686	37.3091	Mtus1	44.377	37.185	30.099	35.434	28.522	32.41	43.316	35.829	37.913	35.337	50.316	36.97	24.171	23.078	23.086	21.828	25.63	25.728	24.168	22.447	23.077	20.908	26.589	23.175	21.5955	13.222	16.3052	13.0636	11.8379	8.05335	2.70728	18.0178	30.5507	37.2551	33.3275	12.6248	17.8683	9.76553	15.1491
Koike_CLKBMAL1_P2124	AR_G450	3_AR450	intron	8.96277	33.6019	4.65402	13.1718	5.27885	20.2015	AK144897	14.53	22.747	23.36	17.621	19.286	22.921	19.79	24.896	22.108	20.463	13.807	20.889	1.769	3.666	3.207	2.891	3.197	2.846	3.109	2.151	2.956	3.507	3.972	2.616	14.8322	14.3238	12.4513	9.91028	6.47911	3.72214	1.90898	8.00791	22.913	31.5235	30.1777	6.31239	15.8651	95.8077	30.2981
Koike_CLKBMAL1_P2126	AR_G451	3_AR451	intron	7.06444	35.3566	5.81959	10.6077	13.8637	8.5365	Hip1r	5.058	6.319	4.772	14.402	9.747	5.162	8.67	6.532	2.451	19.736	13.445	6.145	3.924	2.196	2.945	2.998	2.295	2.243	3.36	3.003	2.835	3.492	2.891	2.784	5.82767	5.50915	9.78314	10.8112	4.31318	1.48885	1.14539	12.0119	15.2754	28.6578	13.4123	10.425	19.7112	17.4196	15.1491
Koike_CLKBMAL1_P2128	AR_G452	3_AR452	intron	5.01235	39.6756	5.26046	17.6788	4.00327	12.8283	Daam1	14.775	13.227	12.62	11.098	8.812	12.467	13.122	12.886	19.922	9.771	12.204	13.035	6.071	6.387	6.49	5.437	6.309	5.624	6.02	7.406	7.811	5.216	7.366	5.494	8.12622	16.2603	13.5136	18.4828	8.38363	5.21099	2.68993	33.0326	49.6449	29.5262	26.8246	11.4293	10.5768	26.1294	7.57453
Koike_CLKBMAL1_P2131	AR_G453	3_AR453	intron	4.92502	32.2993	5.5568	14.1341	14.0881	27.1569	Sec31a	27.286	26.25	22.487	22.615	30.082	24.608	30.4	23.067	32.291	36.208	20.375	30.214	15.353	14.292	13.864	17.886	16.117	15.291	18.399	14.089	19.973	19.696	14.684	19.136	15.9189	11.0183	15.49	15.2613	6.16169	5.70728	4.00886	18.0178	34.3696	17.1947	23.4715	9.46859	23.7977	43.549	30.2981
Koike_CLKBMAL1_P2134	AR_G454	3_AR454	intergenic-10kbless	6.25682	42.044	4.13577	14.4301	10.4477	118.673	Cyp2d13	65.446	138.8	116.207	136.225	128.588	103.442	125.754	131.641	99.839	178.231	101.098	98.807	35.83	50.665	43.922	54.885	46.093	43.78	36.767	46.464	36.612	53.805	54.819	39.927	14.6265	23.1384	23.9885	14.7835	8.62636	3.54167	3.43616	38.2196	35.874	45.5919	30.6857	15.781	22.1952	25.6015	30.2981
Koike_CLKBMAL1_P2138	AR_G455	3_AR455	intron	5.64851	32.8171	5.7882	18.3089	0.168226	11.7863	Cdh2	12.087	15.015	12.085	10.06	7.073	12.91	12.662	11.412	10.947	8.384	12.057	16.744	14.789	17.439	14.462	16.947	16.407	18.691	16.237	16.387	16.169	15.75	16.484	18.266	21.5179	9.91647	13.0442	13.0636	10.4562	3.72214	4.07827	21.0208	15.2754	22.9262	20.1184	7.89049	10.5768	8.7098	30.2981
Koike_CLKBMAL1_P2153	AR_G456	3_AR456	intron	4.66857	59.9018	5.41596	22.3152	22.493	7.18917	Slc25a44	6.862	7.54	6.977	5.287	8.604	10.533	9.42	5.163	7.846	7.131	3.983	6.925	14.86	21.05	19.367	24.177	20.248	21.656	14.129	19.615	22.571	19.065	17.438	16.99	12.6233	18.7311	20.5545	18.0187	12.3794	5.95542	4.58155	27.0267	71.9794	39.4261	23.9796	15.781	24.6791	67.5669	45.2176
Koike_CLKBMAL1_P2158	AR_G457	3_AR457	intron	8.96076	22.376	6.08523	10.7122	8.13883	4.67515	Pcyox1	4.445	4.458	6.368	5.33	3.935	4.553	4.486	4.332	5.548	6.377	2.334	3.938	49.937	62.677	61.941	62.175	56.338	56.939	49.476	60.758	68.597	56.388	53.801	51.398	10.5011	14.3238	4.89157	11.8077	10.0454	2.97771	5.65752	21.0208	8.10057	31.5235	25.8085	6.50368	7.93257	17.4196	15.1491
Koike_CLKBMAL1_P2163	AR_G458	3_AR458	intron	4.47073	27.2118	4.55154	6.96275	15.7186	3.34331	Gas6	2.148	3.086	2.92	2.647	12.426	3.037	2.1	1.281	2.295	2.747	3.116	2.317	5.826	9.906	8.543	13.93	10.929	11.363	5.66	11.859	12.913	11.4	13.39	16.871	16.3041	6.61098	9.78314	7.20748	9.65331	5.21099	1.82221	30.6667	38.1884	31.6104	30.1777	9.46859	7.93257	0	37.8726
Koike_CLKBMAL1_P2166	AR_G459	3_AR459	intron	2.05474	37.05	3.64701	10.443	14.8072	13.1734	Ikbke	14.246	9.917	18.23	17.06	21.529	11.437	17.556	9.733	7.728	12.793	7.667	10.185	8.243	3.476	2.862	3.814	2.325	3.772	5.971	3.224	3.493	4.819	2.007	5.342	1.84128	11.6527	12.1795	10.0331	1.3257	3.72214	4.00886	41.3136	26.7319	14.3289	16.7654	6.31239	10.5768	34.8392	7.57453
Koike_CLKBMAL1_P2173	AR_G460	3_AR460	intron	1.96967	28.518	4.5658	20.4009	1.52831	10.0315	Elovl5	16.315	7.033	5.304	4.619	5.809	15.111	13.623	13.914	22.16	3.182	1.146	12.164	70.588	248.533	86.833	104.935	183.847	278.08	37.783	234.472	305.452	72.526	113.85	155.098	6.70755	12.1201	16.3052	7.20748	10.4749	5.95542	3.0023	24.0237	11.4565	20.0604	0	2.4867	15.7049	0	7.57453
Koike_CLKBMAL1_P2179	AR_G461	3_AR461	intron	4.02263	19.5988	3.39241	11.5175	22.5937	2.70136	Slc13a2	2.177	3.211	0.458	0.846	2.42	6.714	3.118	6.033	0.196	1.277	0.922	5.042	1.084	0.568	1.094	0.321	1.105	1.156	0.546	0.363	0.256	1.411	2.187	1.082	18.8937	16.5274	11.4631	10.3608	4.31318	4.46656	1.83956	9.0089	34.3696	8.59733	10.0592	4.44737	7.1313	17.4196	15.1491
Koike_CLKBMAL1_P2184	AR_G462	3_AR462	intron	2.27125	39.3997	3.28743	15.9505	4.58687	29.3679	Ppap2b	26.634	37.885	47.42	20.764	23.246	31.763	37.524	21.596	31.917	33.525	9.603	30.537	30.94	57.328	47.56	39.849	42.175	41.728	28.37	52.229	48.514	36.323	47.931	37.989	9.7522	16.5274	17.4417	7.49414	5.54552	3.85749	2.53374	27.0267	42.0073	22.9262	13.4123	15.8766	15.8651	8.70978	53.0217
Koike_CLKBMAL1_P2191	AR_G463	3_AR463	intergenic-10kbless	23.6925	35.7405	2.54631	18.2133	7.74237	5.43578	Mtif3	4.343	6.974	6.873	5.658	5.183	5.939	5.516	4.891	5.456	6.557	3.933	3.904	11.117	10.253	11.543	11.108	11.896	9.906	9.852	12.551	10.504	10.884	9.633	9.683	9.76917	22.0366	12.056	11.9852	3.69701	2.63933	3.31468	33.0326	15.2754	17.1947	19.1024	14.8724	21.0734	61.2325	12.1652
Koike_CLKBMAL1_P2198	AR_G464	3_AR464	intron	4.86477	64.1963	4.88129	18.1159	4.58687	29.3679	Ppap2b	26.634	37.885	47.42	20.764	23.246	31.763	37.524	21.596	31.917	33.525	9.603	30.537	30.94	57.328	47.56	39.849	42.175	41.728	28.37	52.229	48.514	36.323	47.931	37.989	9.7522	18.7311	10.5984	14.374	9.8587	5.21099	4.58155	39.0386	59.8285	45.8524	40.2369	12.6248	23.7977	8.70978	53.0217
Koike_CLKBMAL1_P2201	AR_G465	3_AR465	TSS	4.8032	39.214	5.16482	14.2468	21.6811	33.7282	Acox2	29.783	40.227	17.222	44.571	22.987	43.737	41.123	41.469	19.777	30.352	38.622	34.867	54.723	53.079	44.846	53.519	50.617	47.015	54.844	48.196	49.368	48.954	45.69	48.86	3.02563	15.4256	17.3428	17.3225	7.69277	2.23328	1.42306	31.9407	45.8261	45.8524	20.1184	12.29	13.2209	48.8276	37.8726
Koike_CLKBMAL1_P2202	AR_G466	3_AR466	TSS	6.41102	49.1281	5.03602	15.9949	12.5694	17.1915	Bat1a	15.915	16.389	14.112	17.976	18.115	15.586	21.411	19.955	12.945	23.78	16.381	13.731	11.692	8.195	10.113	9.813	7.29	9.831	9.015	9.834	9.072	10.066	10.813	9.201	2.36464	10.1168	10.5984	10.3608	10.0454	2.97771	6.87233	21.0208	34.3696	34.3893	36.8838	4.73429	21.1535	40.1178	15.1491
Koike_CLKBMAL1_P2203	AR_G467	3_AR467	intron	3.75149	35.7896	4.0932	20.9301	19.4288	7.68083	D19Ertd386e	7.539	6.487	7.648	7.151	7.214	7.637	8.266	8.791	7.01	7.905	9.043	7.479	3.06	2.507	2.715	2.267	2.933	3.686	2.974	2.486	3.136	2.744	3.066	3.26	22.0267	16.5274	14.6747	12.1626	7.39402	6.69985	2.86347	33.0326	15.2754	22.9262	13.4123	9.46859	13.2209	52.2587	22.7236
Koike_CLKBMAL1_P2209	AR_G468	3_AR468	intron	4.29295	37.8443	5.97272	18.7318	4.62199	18.6136	Hook3	17.058	17.384	16.788	16.25	13.655	18.437	23.1	19.58	26.963	19.682	15.831	18.635	3.514	4.337	3.865	4.437	5.005	4.543	4.056	4.639	4.189	4.507	5.637	4.148	17.1042	11.0183	12.9207	11.9715	10.9603	6.69985	3.97415	33.0326	11.4565	31.5235	13.4123	17.3591	13.2209	56.7456	30.2981
Koike_CLKBMAL1_P2211	AR_G469	3_AR469	TSS	6.79228	38.189	6.56012	12.8789	12.6697	39.2697	Sdc4	22.515	37.463	25.892	70.133	37.309	30.596	30.118	44.361	18.213	80.159	35.518	38.96	112.535	77.399	99.825	106.599	85.467	82.586	95.946	68.208	96.809	108.976	91.414	88.188	14.4993	14.3238	12.7724	13.9645	12.1553	6.4517	5.06747	10.1919	34.3696	60.876	20.1184	3.1562	9.29473	52.2588	15.1491
Koike_CLKBMAL1_P2215	AR_G470	3_AR470	intergenic-10kbless	0.953814	29.0641	6.03562	10.9181	7.1614	7.51156	Fth1	6.534	8.818	11.306	6.89	5.284	7.394	6.688	6.442	9.336	8.076	5.983	7.388	566.438	685.982	672.153	618.121	675.74	618.127	502.644	831.984	861.568	561.35	600.016	522.71	9.24392	6.61098	11.4137	8.38143	6.77785	5.95542	1.71808	30.0297	19.0942	2.86578	16.7654	9.46859	7.93257	0	0
Koike_CLKBMAL1_P2217	AR_G471	3_AR471	TSS	5.34511	37.5814	3.08795	14.3892	3.24579	10.6969	Scap	8.414	12.269	9.881	14.302	8.411	11.407	12.549	16.712	5.708	11.206	6.884	10.62	20.222	21.829	14.161	14.298	15.788	18.051	19.941	18.931	14.057	18.213	19.266	19.181	1.27973	13.222	13.0442	6.30654	3.69701	2.97771	1.63131	15.0148	38.1884	22.9262	20.1184	4.73429	5.28838	8.70978	22.7236
Koike_CLKBMAL1_P2222	AR_G472	3_AR472	TSS	5.24124	86.6714	7.65185	15.3725	3.30841	9.30749	Eef1a1	10.373	9.291	9.07	6.987	6.733	9.495	11.357	9.283	15.624	7.217	6.039	10.221	1470.26	1702.18	1638.04	1570.13	1504.81	1541.37	1446.41	1803.49	1575.56	1489.76	1702.69	1596.28	8.37731	9.18191	7.33736	10.0604	12.286	3.72214	2.29078	54.0534	49.6449	65.9129	36.8838	10.3772	36.2975	60.9686	45.4472
Koike_CLKBMAL1_P2227	AR_G473	3_AR473	intron	4.06552	54.9986	4.55138	18.6871	11.005	12.4051	Ttc7	13.67	12.846	18.042	10.805	14.128	13.533	11.989	9.635	9.479	13.324	12.445	8.964	7.087	9.612	7.597	7.896	6.804	6.617	6.104	9.988	6.893	7.707	5.592	7.558	7.39934	15.2253	22.5309	11.6303	8.42097	9.0008	1.30158	36.0356	34.3696	36.6472	23.4715	11.0467	16.426	17.4196	37.8726
Koike_CLKBMAL1_P2232	AR_G474	3_AR474	TSS	5.41198	44.1244	4.63456	16.2928	5.19384	23.275	Inhbe	28.194	37.639	52.471	9.359	16.822	19.171	31.426	11.359	39.493	16.675	5.244	11.447	18.756	38.218	25.889	30.158	32.491	39.684	26.704	47.376	26.178	20.375	24.102	25.879	4.64647	13.9231	14.6747	15.8619	8.55167	2.97771	3.78325	42.0415	7.63768	43.6814	44.7077	9.46859	29.0861	17.4196	0
Koike_CLKBMAL1_P2233	AR_G475	3_AR475	TSS	4.46605	52.3672	2.55651	18.8314	3.62918	4.85481	Dyrk1a	4.385	4.343	4.852	3.589	4.375	4.763	5.305	6.417	5.081	5.666	4.5	4.982	2.759	2.599	1.874	2.135	2.554	2.053	2.613	2.198	2.18	2.413	2.407	2.587	23.8593	15.4256	14.6747	5.85608	3.69701	2.97771	2.86347	34.3976	34.3696	22.9262	26.8246	4.73429	10.5768	78.3881	45.4472
Koike_CLKBMAL1_P2235	AR_G476	3_AR476	TSS	4.02171	48.8545	3.0537	22.3129	10.3108	14.4206	F7	10.856	13.791	15.84	15.314	19.396	13.708	17.57	17.291	10.939	15.5	11.843	10.999	39.507	29.705	35.032	33.432	33.131	30.583	36.357	29.889	26.859	40.824	40.124	38.814	19.6944	23.6393	21.8144	10.8249	4.83599	5.21099	4.00886	18.0178	45.8261	34.3893	13.4123	6.31239	26.4419	17.4196	37.8726
Koike_CLKBMAL1_P2250	AR_G477	3_AR477	intron	7.46755	76.8892	4.6974	14.6525	8.63565	6.95231	Galm	4.785	9.53	8.476	8.703	5.05	6.217	5.84	7.417	5.881	8.893	6.516	6.118	24.508	35.306	34.723	35.158	34.04	34.687	24.199	36.205	38.382	32.372	31.001	29.139	11.7339	11.7528	12.9701	13.0636	5.34013	2.97771	2.29078	45.0445	34.3696	63.0471	57.0023	11.0467	10.5768	17.4196	22.7236
Koike_CLKBMAL1_P2253	AR_G478	3_AR478	intron	5.00405	31.3279	4.10651	21.0195	8.03303	8.21183	Prkce	8.892	9.77	9.526	8.757	9.227	7.144	7.756	6.428	9.022	7.332	7.567	7.121	1.357	1.867	1.43	1.063	1.692	0.956	1.402	2.008	2.514	1.269	1.591	1.493	8.05177	16.5274	13.8595	11.5347	9.8587	8.1887	3.43616	12.0119	19.0942	25.792	10.0592	6.31239	29.0861	0	15.1491
Koike_CLKBMAL1_P2258	AR_G479	3_AR479	intron	7.52741	64.9192	5.8576	14.5692	1.02928	66.8332	Haao	65.417	76.601	60.619	67.736	71.005	81.337	93.929	79.024	52.193	57.721	46.962	49.454	77.32	107.13	89.33	78.774	87.424	85.011	78.59	102.503	94.489	74.398	91.481	80.774	7.19058	13.222	14.6747	19.8888	7.39402	6.00054	1.71808	18.0178	45.5946	94.5706	53.6492	15.781	41.9865	26.1294	13.0833
Koike_CLKBMAL1_P2261	AR_G480	3_AR480	TSS	5.12211	71.9121	5.26501	11.6205	10.6808	4.31734	Hook2	2.795	4.502	5.872	5.171	3.152	2.539	4.07	3.989	3.196	8.151	5.553	2.817	1.998	3.975	2.858	2.309	2.611	2.361	2.132	4.134	2.532	2.341	2.866	2.381	7.37105	7.71281	11.2654	10.3608	4.31318	2.97771	1.1801	27.0267	64.9203	40.1209	23.4715	13.8681	18.5093	37.4785	7.57453
Koike_CLKBMAL1_P2266	AR_G481	3_AR481	TSS	4.10708	31.9833	4.13112	12.8328	1.37012	9.958	Ppp2r5a	8.543	11.6	8.712	7.255	9.612	11.727	13.78	12.124	10.545	9.517	4.037	12.044	35.883	49.466	37.716	38.961	46.614	48.059	36.585	50.957	48.535	35.243	45.533	41.231	5.27678	10.1502	12.2289	7.65795	3.69701	1.48885	2.86347	27.0267	34.3696	17.1947	13.4123	5.78636	7.93257	17.4196	22.7236
Koike_CLKBMAL1_P2271	AR_G482	3_AR482	intron	7.69652	39.0794	4.67814	12.0298	7.7865	8.94102	3110002H16Rik	6.17	11.044	12.401	10.331	6.846	8.292	8.839	7.847	10.236	10.304	5.705	9.277	3.214	3.771	4.381	4.543	3.917	4.256	4.378	4.151	4.204	4.46	4.34	4.445	14.9604	13.222	16.3052	9.71918	6.16169	2.23328	2.93289	9.0089	26.7319	42.9866	20.1184	9.46859	7.93257	5.27867	12.1652
Koike_CLKBMAL1_P2283	AR_G483	3_AR483	intron	9.73848	26.1961	6.89175	19.3067	11.5554	8.60821	Zfp106	8.113	8.045	7.164	8.745	8.996	7.754	10.068	7.984	9.232	11.874	7.019	8.305	8.553	8.219	9.162	9.291	9.568	8.32	8.836	9.17	9.14	9.811	8.666	9.071	13.9158	7.71281	17.1205	12.2172	9.63464	7.44427	3.43616	9.0089	7.63768	20.0604	16.7654	6.31239	13.5415	26.1294	30.2981
Koike_CLKBMAL1_P2284	AR_G484	3_AR484	intron	1.70436	31.0225	3.31054	18.5706	11.081	4.39857	Ankrd27	2.885	4.634	3.528	6.118	4.57	3.868	4.898	5.115	3.595	6.218	3.895	3.46	3.14	3.324	2.924	2.769	3.284	3.22	3.502	3.299	3.083	3.147	3.445	3.91	23.2822	18.7311	17.5652	12.6813	4.96669	3.76725	5.15424	21.0208	22.913	17.1947	10.1608	9.46859	21.1535	78.3881	83.3197
Koike_CLKBMAL1_P2287	AR_G485	3_AR485	intron	4.30326	36.0132	4.86214	15.5628	21.1054	5.19339	Crat	4.516	4.776	5.875	4.363	5.274	8.143	5.672	4.55	4.46	6.826	2.378	5.487	3.857	13.531	5.486	6.775	14.841	10.688	4.523	12.626	13.147	6.798	8.802	7.378	11.8462	16.5274	13.8595	12.6131	7.39402	5.95542	2.29078	33.0326	22.913	31.5235	23.4715	4.73429	21.1535	69.6783	55.7761
Koike_CLKBMAL1_P2293	AR_G486	3_AR486	TSS	8.99152	29.0008	4.30517	9.71144	22.539	6.54222	Aqp8	8.364	3.271	4.46	0.907	2.897	21.723	11.773	3.207	11.39	0.62	2.049	7.846	29.491	112.694	28.284	47.078	70.63	81.842	27.772	87.671	66.982	28.888	71.16	45.342	4.73429	9.91647	12.896	6.75701	8.01019	2.41375	4.21711	15.0148	15.2754	25.792	36.8838	11.0467	25.9611	26.1294	30.2981
Koike_CLKBMAL1_P2294	AR_G487	3_AR487	intron	7.61961	31.2957	6.55431	12.004	5.80725	9.25987	Bcar1	10.009	11.471	11.059	11.632	9.702	7.656	10.564	9.609	7.049	8.745	7.111	6.511	8.341	10.33	7.469	6.996	7.035	7.906	8.959	9.551	7.066	8.145	9.415	7.627	3.7149	7.71281	8.15262	7.98556	8.62636	6.69985	0	21.0208	15.2754	36.4735	16.7654	11.0467	13.2209	8.70978	15.149
Koike_CLKBMAL1_P2295	AR_G488	3_AR488	intron	5.63594	63.9717	4.43432	21.635	6.95929	5.36032	Pxn	4.526	6.926	5.422	7.142	6.435	5	5.64	6.504	3.351	5.666	3.504	4.208	4.041	4.78	3.712	4.327	3.831	4.476	4.228	5.036	3.998	3.772	4.373	4.504	2.6945	20.5007	26.6566	14.8654	10.4749	5.66216	4.80716	52.1424	49.6449	54.4497	34.8516	9.46859	15.8651	26.1294	60.5962
Koike_CLKBMAL1_P2296	AR_G489	3_AR489	TSS	5.7927	34.6959	3.4204	15.3478	4.56572	41.8521	Slc25a10	42.245	58.618	74.904	39.019	20.997	51.208	54.971	33.092	47.592	33.055	15.523	31.002	39.359	117.231	76.23	60.866	96.999	57.226	37.56	130.87	154.084	59.996	61.982	47.288	9.23345	18.5642	13.2418	11.6712	4.92935	3.42888	2.29078	24.0237	26.7319	51.584	16.7654	3.58659	11.5383	15.3081	7.57453
Koike_CLKBMAL1_P2303	AR_G490	3_AR490	intron	3.38617	51.2579	4.76933	13.6402	12.2663	4.31536	Hdgf	4.045	4.043	4.054	5.345	4.589	3.82	4.304	3.526	3.13	8.106	4.032	2.789	46.059	56.514	56.055	56.047	53.304	48.346	42.782	55.82	58.942	54.268	49.95	45.543	11.0957	13.222	12.2289	9.35061	6.77785	4.46656	1.14539	33.0326	68.1605	45.0708	32.5147	17.3591	39.5827	104.518	30.2981
Koike_CLKBMAL1_P2309	AR_G491	3_AR491	TSS	5.80527	44.7354	4.3979	15.806	12.804	10.3764	Fam100a	8.343	9.671	10.952	15.81	13.793	9.065	10.4	9.522	5.258	15.742	8.15	7.812	6.161	4.598	4.739	5.132	4.276	4.065	5.679	5.925	4.983	5.633	4.38	4.393	6.2057	18.7311	19.8874	9.74648	8.62636	6.69985	0.572694	26.7537	50.1078	40.1209	20.1184	9.46859	20.3522	58.0653	15.1491
Koike_CLKBMAL1_P2310	AR_G492	3_AR492	intron	6.10568	64.4681	7.18503	13.66	11.1268	8.79087	Cnn3	6.235	8.294	11.104	9.754	7.863	11.441	8.791	6.302	9.378	12.19	5.083	9.056	34.183	52.235	48.412	49.712	45.85	43.877	31.162	51.225	45.564	49.054	43.972	42.339	11.9135	6.61098	14.6747	10.8112	10.0081	5.95542	3.12378	33.0326	56.2411	40.1209	50.2961	13.7725	37.0187	26.1294	53.0217
Koike_CLKBMAL1_P2325	AR_G493	3_AR493	intron	6.39409	31.3746	4.69501	16.9377	8.34285	4.90207	Foxk1	4.166	5.701	5.857	6.822	4.574	3.815	4.692	5.831	4.146	4.766	4.742	3.715	2.989	3.786	3.118	2.821	3.057	2.721	2.915	4.076	2.996	2.778	3.083	3.048	6.06463	13.4891	15.2923	11.9306	8.57034	4.46656	3.47087	19.8378	31.708	38.2972	21.4394	5.11686	0	0	0
Koike_CLKBMAL1_P2328	AR_G494	3_AR494	TSS	2.57086	54.5637	4.20488	14.4751	5.28821	10.0358	Agxt2l2	11.221	11.05	11.859	10.622	9.313	9.624	9.579	10.891	8.781	10.728	7.514	9.249	8.515	7.927	8.716	8.041	7.457	6.892	7.657	8.303	8.513	7.84	6.918	9.069	7.18701	12.1201	13.0442	7.84905	7.39402	2.97771	1.82221	42.0415	64.9203	22.9262	6.70615	14.1072	18.5093	69.6783	37.8726
Koike_CLKBMAL1_P2333	AR_G495	3_AR495	intron	7.35365	43.533	7.33149	18.8361	4.70042	15.8128	Pum1	15.714	18.143	16.191	15.205	13.558	15.342	16.7	18.774	15.767	16.714	13.909	13.736	5.61	6.936	5.104	5.359	5.202	5.354	5.41	6.498	5.627	4.787	6.166	4.993	5.40345	11.0183	8.96788	9.93759	11.6512	5.21099	3.43616	15.0148	34.3696	22.9262	40.2369	6.31239	10.5768	8.70978	15.1491
Koike_CLKBMAL1_P2338	AR_G496	3_AR496	TSS	7.18225	54.8984	3.26896	12.4037	12.7165	4.56487	Rassf1	4.099	4.069	5.799	5.281	4.561	5.286	6.085	3.813	3.622	4.627	4.002	3.534	1.882	2.265	2.445	2.575	2.137	2.079	2.778	2.924	2.708	2.482	1.904	2.462	8.32251	14.3238	8.15262	7.20748	6.16169	3.72214	1.14539	33.0326	19.0942	57.3155	30.1777	4.73429	13.2209	26.1294	0
Koike_CLKBMAL1_P2349	AR_G497	3_AR497	intron	7.71361	45.8907	9.23171	19.0273	13.1126	13.2079	Txndc5	11.412	9.791	14.569	15.527	19.853	13.211	12.975	9.878	10.195	23.399	6.679	11.006	40.205	41.76	40.497	44.794	37.329	38.981	42.383	45.356	44.378	58.613	40.282	54.478	13.7416	5.50915	8.74554	18.4828	21.9207	2.23328	3.21056	18.0178	26.7319	40.1209	31.2954	14.2029	15.8651	34.8392	15.1491
Koike_CLKBMAL1_P2351	AR_G498	3_AR498	intron	8.49787	32.6033	5.05179	14.9015	1.52831	10.0315	Elovl5	16.315	7.033	5.304	4.619	5.809	15.111	13.623	13.914	22.16	3.182	1.146	12.164	70.588	248.533	86.833	104.935	183.847	278.08	37.783	234.472	305.452	72.526	113.85	155.098	6.70755	9.91647	12.2536	7.20748	6.16169	5.95542	1.14539	9.0089	15.2754	37.2551	23.4715	9.46859	5.28838	26.1294	15.1491
Koike_CLKBMAL1_P2357	AR_G499	3_AR499	TSS	2.74081	44.4047	1.9855	15.0258	13.9088	6.49408	Nudt16l1	5.314	6.333	6.597	7.007	6.258	7.407	5.933	5.778	5.363	9.018	6.32	6.6	9.152	10.096	9.09	9.202	8.686	8.143	9.323	10.715	7.651	7.28	6.879	9.271	4.57654	16.4607	15.49	6.38845	0	4.39889	2.36019	36.0356	31.5922	14.3289	20.1184	1.5781	15.8651	26.9212	22.7236
Koike_CLKBMAL1_P2359	AR_G500	3_AR500	TSS	6.42369	29.9412	3.77987	13.639	9.5416	4.05962	Smad7	5.023	5.558	3.026	5.906	5.617	2.956	2.215	5.654	1.846	6.566	2.431	1.917	2.431	1.845	1.127	1.191	1.74	1.987	1.087	1.591	1.765	1.058	1.886	1.11	0.99988	11.0183	13.8595	8.10841	3.08084	1.48885	0.572694	18.0178	11.9194	28.6578	13.4123	1.8172	5.28838	26.1294	7.57453
Koike_CLKBMAL1_P2365	AR_G501	3_AR501	intron	6.57588	37.5935	4.44496	14.6906	4.60476	4.25452	AK029023	4.737	5.264	6.373	2.792	3.525	4.133	4.378	3.719	5.899	3.511	2.558	4.167	2.372	3.574	3.19	3.256	3.987	4.322	2.658	4.636	4.769	2.523	3.152	2.825	9.38676	14.4573	22.5803	15.8756	6.9459	2.48142	3.47087	31.3037	27.3105	42.3788	40.3385	12.6726	23.3971	48.8276	45.4472
Koike_CLKBMAL1_P2368	AR_G502	3_AR502	intergenic-10kbless	3.74066	34.7428	5.47366	19.9516	4.08598	23.8721	F11	10.657	37.188	31.329	27.745	11.472	22.241	28.908	45.872	14.629	18.402	9.191	28.829	36.322	18.073	23.073	26.103	15.948	25.03	32.427	14.997	11.926	33.899	18.611	21.039	23.4147	16.5274	15.49	17.5682	9.24253	6.85775	2.29078	36.0356	33.6752	22.9262	20.1184	6.31239	15.5446	17.4196	22.7236
Koike_CLKBMAL1_P2375	AR_G503	3_AR503	intron	9.54313	25.4914	4.49504	11.0928	5.86982	11.6612	Zfp395	5.24	17.432	10.257	13.937	12.58	10.721	11.031	19.088	6.226	13.561	7.503	12.36	3.499	7.632	4.47	4.584	4.544	5.469	2.402	7.934	4.585	4.61	7.901	5.867	10.6092	12.1201	13.0442	8.10841	4.31318	5.21099	1.61396	9.0089	15.2754	22.9262	36.8838	8.75127	6.81079	35.367	15.1491
Koike_CLKBMAL1_P2377	AR_G504	3_AR504	intron	1.65061	38.526	5.38723	10.9787	21.1006	13.4387	F10	13.309	11.117	11.686	12.686	17.785	14.624	16.247	16.553	11.478	13.424	11.708	10.648	117.712	84.027	104.563	100.306	98.134	95.791	111.95	88.967	85.284	111.362	106.838	118.48	21.0819	5.50915	12.2289	8.10841	5.4895	5.21099	0.572694	30.0297	30.5507	22.9262	13.4123	6.31239	23.7977	26.1294	30.2981
Koike_CLKBMAL1_P2382	AR_G505	3_AR505	intergenic-10kbless	3.72612	47.5567	5.64857	13.3557	23.6815	8.07535	Hyi	7.76	8.334	8.864	3.845	7.087	13.078	11.49	6.821	8.239	8.174	4.274	8.937	9.333	26.023	20.715	19.59	19.541	19.454	9.805	25.467	20.853	18.804	19.617	16.186	11.0288	8.81464	21.1968	9.00935	10.5869	6.42914	3.31468	41.6775	38.1884	28.2236	32.1082	18.9372	21.3138	69.6784	97.7802
Koike_CLKBMAL1_P2385	AR_G506	3_AR506	intron	3.79047	41.614	3.55489	12.3605	0.861724	44.3906	Ghr	48.383	47.24	35.879	40.057	34.931	51.703	55.186	44.744	59.977	27.407	33.223	53.958	101.31	122.087	136.513	136.263	121.374	130.084	109.77	124.962	130.745	125.328	125.709	117.082	12.9333	17.2286	13.0442	8.43603	9.8587	4.46656	2.86347	35.8536	20.1357	32.1314	26.8246	9.46859	26.4419	17.4196	45.4472
Koike_CLKBMAL1_P2387	AR_G507	3_AR507	intron	1.7578	28.6435	5.997	13.5702	13.0061	10.3718	Vav2	8.839	10.042	11.132	11.832	11.59	10.334	11.102	11.128	6.608	13.039	11.442	7.374	5.772	5.097	5.573	5.562	5.766	5.153	5.903	5.446	5.258	5.79	5.132	6.457	21.9053	10.8514	11.2654	10.156	9.24253	4.46656	4.00886	36.0356	15.2754	25.792	10.0592	9.46859	10.5768	0	15.1491
Koike_CLKBMAL1_P2391	AR_G508	3_AR508	intergenic-10kbless	5.81643	36.9266	5.69208	10.1163	19.986	5.31482	Ppa1	7.197	6.257	3.949	4.483	9.061	7.839	5.396	2.83	3.292	5.536	2.636	5.301	70.058	47.884	45.842	52.705	54.779	48.3	58.704	47.711	55.82	51.262	55.193	65.652	23.0536	9.91647	7.95498	7.94461	8.01019	5.21099	2.68993	21.0208	30.5507	25.792	30.1777	15.781	29.0861	34.8392	22.7236
Koike_CLKBMAL1_P2403	AR_G509	3_AR509	intron	5.21075	47.4284	5.85884	17.8658	20.196	44.2113	Lifr	63.18	45.394	21.798	28.433	50.633	24.99	30.809	70.767	32.466	39.068	90.293	32.705	71.112	15.177	36.659	25.526	19.335	26.342	75.544	16.198	13.836	41.161	36.828	29.792	0.631852	11.0183	13.8595	13.9235	9.59729	2.23328	2.53374	33.0326	38.1884	31.5235	23.4715	7.89049	7.93257	34.8392	37.8726
Koike_CLKBMAL1_P2406	AR_G510	3_AR510	intron	4.59765	37.5778	8.27012	15.9225	2.14756	13.2016	Slc35d2	12.471	14.378	14.479	9.065	10.052	18.865	16.633	15.579	20.025	6.699	4.43	15.742	10.119	14.224	14.642	12.48	11.475	13.697	9.388	13.438	11.155	12.599	13.98	13.513	13.3094	4.40732	13.8595	13.0636	11.7072	5.95542	3.88738	30.0297	50.8022	20.0604	20.1184	12.6248	17.5478	45.1326	22.9531
Koike_CLKBMAL1_P2423	AR_G511	3_AR511	intron	4.70029	44.7343	4.22075	13.1225	14.4189	7.92267	Dap	7.595	4.839	5.902	15.26	11.821	7.343	7.499	7.077	5.051	8.235	9.742	4.708	142.224	78.489	112.131	102.248	105.641	108.937	120.309	85.54	95.391	85.949	108.083	132.926	22.8325	8.81464	15.49	6.36115	4.92935	4.1733	2.93289	21.0208	34.3696	16.8473	26.8246	7.89049	15.8651	17.4196	37.8726
Koike_CLKBMAL1_P2434	AR_G512	3_AR512	intron	2.16146	27.4824	4.24021	12.1119	12.2079	31.3792	Slc25a42	24.526	29.312	31.634	44.801	23.606	33.552	32.714	32.945	18.908	47.284	30.479	26.789	15.457	17.19	15.835	15.072	19.794	17.592	16.653	17.323	14.091	12.619	21.677	15.802	21.0998	8.98158	15.1688	6.85257	3.73435	3.00027	0	30.0297	23.0288	17.1947	6.80776	11.0467	16.1856	10.0295	22.7236
Koike_CLKBMAL1_P2440	AR_G513	3_AR513	intron	4.97269	42.5969	3.45107	15.4156	5.07699	69.7263	Ddi2	61.149	80.198	63.534	76.076	66.756	62.471	80.381	93.516	53.215	80.218	62.206	56.997	48.095	45.331	49.199	51.091	51.623	47.559	49.389	40.325	41.862	46.499	48.396	46.928	18.6738	14.3238	10.5984	8.55888	7.2073	5.52681	5.81371	21.0208	38.1884	28.6578	13.4123	14.2029	5.28838	17.4196	0
Koike_CLKBMAL1_P2444	AR_G514	3_AR514	intron	9.22683	12.9862	4.48867	9.98659	7.72847	5.80318	Jarid2	5.105	6.776	6.245	6.47	5.588	5.683	5.301	6.622	5.371	6.633	4.805	5.038	1.514	2.063	1.49	1.556	1.363	1.624	2.021	1.436	1.587	1.36	1.424	1.31	4.62239	11.0183	9.46198	10.4973	7.41269	2.97771	4.00886	20.6568	19.0942	17.8894	26.8246	6.31239	7.53193	26.1294	0
Koike_CLKBMAL1_P2455	AR_G515	3_AR515	intron	4.83277	45.4846	4.92209	16.4481	6.63332	17.2658	1300018J18Rik	15.364	17.543	18.698	18.182	14.413	16.234	19.891	19.004	17.536	19.581	15.582	15.163	19.954	25.949	26.143	20.247	20.721	19.949	19.56	25.854	25.901	20.918	22.258	19.786	8.7003	16.5274	11.2654	12.1626	10.2508	5.43658	2.67257	36.0356	34.3696	31.5235	20.1184	15.781	5.28838	8.70978	7.57453
Koike_CLKBMAL1_P2458	AR_G516	3_AR516	3' UTR	3.16224	30.2268	4.85432	12.7964	0.253067	6.88111	Bcr	7.917	8.912	5.377	8.324	8.275	6.217	7.935	7.01	3.96	7.985	5.767	4.895	3.85	4.256	3.699	4.898	4.603	4.694	4.258	4.525	3.978	5.08	4.766	5.41	18.6665	11.0183	16.1817	9.91028	7.71144	4.46656	1.71808	36.7636	32.1708	20.0604	26.8246	9.46859	13.2209	52.2588	15.1491
Koike_CLKBMAL1_P2463	AR_G517	3_AR517	intron	4.45809	35.5102	1.95003	14.122	8.03303	8.21183	Prkce	8.892	9.77	9.526	8.757	9.227	7.144	7.756	6.428	9.022	7.332	7.567	7.121	1.357	1.867	1.43	1.063	1.692	0.956	1.402	2.008	2.514	1.269	1.591	1.493	8.05177	16.9615	15.1441	6.4294	2.46467	2.75213	4.14769	27.0267	42.0073	28.6578	16.7654	8.60781	18.5093	17.4196	7.57453
Koike_CLKBMAL1_P2466	AR_G518	3_AR518	intron	7.03038	32.3379	7.18231	16.4602	18.3806	6.12509	Eefsec	6.973	5.41	5.976	7.396	5.925	7.839	5.421	6.361	3.67	5.989	6.875	5.664	6.644	6.826	6.669	6.643	6.669	6.725	6.246	8.034	7.26	8.648	6.514	7.493	11.3141	5.50915	14.6747	13.0636	8.01019	5.59448	2.68993	21.0208	24.0703	5.73155	36.8838	6.31239	5.28838	26.1294	37.8726
Koike_CLKBMAL1_P2467	AR_G519	3_AR519	TSS	0.585955	23.9162	2.38714	16.802	20.2598	6.36789	Ap1m1	6.432	6.691	5.864	6.14	7.38	7.164	6.84	6.423	4.452	6.442	6.121	6.466	7.612	7.295	7.009	8.622	7.486	7.059	7.563	7.169	7.976	8.006	6.796	8.107	13.9974	16.5274	15.49	5.85608	2.46467	4.46656	1.71808	24.0237	11.4565	8.59733	13.4123	3.1562	13.2209	34.8392	37.8726
Koike_CLKBMAL1_P2468	AR_G520	3_AR520	intron	5.34593	33.5792	4.77711	14.9955	9.33584	5.84879	Dnmt3a	5.228	6.259	8.421	7.802	6.51	4.504	5.299	6.391	4.242	6.714	5.076	3.74	2.013	1.328	1.259	1.535	1.157	1.139	1.496	1.52	1.077	1.424	1.685	1.386	1.08311	6.61098	19.5663	10.8249	4.77997	3.78981	2.88082	24.0237	30.5507	28.6578	16.7654	4.73429	7.93257	0	37.8726
Koike_CLKBMAL1_P2471	AR_G521	3_AR521	TSS	3.74011	44.2492	2.4348	15.7511	10.7568	107.002	Apoa5	92.35	75.671	87.214	232.801	69.726	62.664	71.871	99.853	176.382	104.765	130.816	79.911	218.617	337.683	432.34	404.584	485.692	281.456	319.989	396.016	512.439	263.356	335.856	254.97	11.578	22.0366	15.3912	7.8354	7.39402	7.44427	2.86347	40.6766	22.913	28.6578	36.8838	20.5153	30.2079	52.2587	30.2981
Koike_CLKBMAL1_P2473	AR_G522	3_AR522	intron	6.39448	35.6323	2.63711	12.5765	5.88099	8.00312	Dhx9	5.849	8.192	8.209	6.271	4.744	7.215	8.849	8.223	14.042	7.627	7.258	9.557	6.782	7.004	6.051	7.443	7.136	7.64	7.859	6.884	7.691	7.724	7.006	7.762	20.4063	16.8279	12.2289	5.37831	5.54552	2.23328	1.71808	9.0089	34.3696	22.9262	16.7654	7.89049	5.28838	26.1294	22.035
Koike_CLKBMAL1_P2476	AR_G523	3_AR523	intron	3.59323	19.9274	4.76764	10.6475	16.4064	85.3919	C8a	70.995	71.114	62.762	81.575	137.852	72.695	81.86	100.11	48.547	92.118	130.164	74.911	339.253	92.945	140.055	203.375	147.536	181.203	329.349	107.938	85.02	226.288	215.958	302.657	22.5457	9.91647	17.0958	9.47347	7.02059	7.44427	1.14539	33.0326	37.6098	26.1394	10.0592	9.13384	10.5768	26.1294	15.1491
Koike_CLKBMAL1_P2477	AR_G524	3_AR524	intron	10.0613	30.8533	3.3818	11.0241	23.2612	4.95469	Pabpc1	4.602	4.511	5.03	3.68	4.086	5.01	5.151	4.025	6.734	5.168	4.355	7.104	28.385	27.218	25.533	25.341	22.444	24.419	27.957	28.871	25.115	25.032	28.355	26.765	3.65795	12.1201	8.96788	8.23127	3.08084	4.75982	1.71808	12.0119	15.2754	11.4631	30.1777	3.1562	15.8651	43.549	15.1491
Koike_CLKBMAL1_P2480	AR_G525	3_AR525	TSS	9.22932	17.9709	3.45075	12.748	3.35157	7.34493	2610101N10Rik	5.972	6.836	7.009	4.932	5.693	7.457	8.13	8.739	10.968	6.692	6.641	9.072	5.125	4.334	3.837	5.051	4.144	4.547	4.756	4.77	4.271	3.969	4.935	5.686	23.1193	24.8746	17.5405	9.43252	7.39402	4.46656	3.43616	32.1227	22.5659	25.0104	23.4715	7.89049	10.6569	78.3881	33.5115
Koike_CLKBMAL1_P2483	AR_G526	3_AR526	3' UTR	7.78378	32.8445	5.2848	12.1759	8.57185	8.04512	Mtfr1	6.929	6.808	8.169	7.712	6.144	9.419	8.965	7.734	9.592	9.393	7.39	8.286	18.191	20.722	21.924	20.391	21.668	21.601	18.485	18.964	22.921	20.167	19.935	18.719	12.824	5.97659	14.6747	12.1626	4.31318	1.48885	1.14539	15.0148	11.4565	37.2551	16.7654	7.89049	10.5768	34.8392	22.7236
Koike_CLKBMAL1_P2493	AR_G527	3_AR527	intron	5.96319	37.4097	8.3441	12.3161	19.6096	9.04691	Tnfrsf1a	10.536	9.035	10.583	7.941	12.826	9.837	10.58	8.475	5.554	9.396	8.778	5.023	26.88	23.787	17.109	23.155	16.78	18.997	22.553	23.329	16.905	16.471	19.358	22.932	2.52297	5.50915	6.5221	12.2445	6.77785	7.39916	3.43616	24.0237	26.7319	22.9262	30.1777	6.31239	15.8651	8.7098	15.1491
Koike_CLKBMAL1_P2497	AR_G528	3_AR528	TSS	4.5105	37.2114	4.24608	12.897	4.50187	12.2223	Ube2i	10.581	14.499	12.908	11.639	11.944	10.624	15.958	16.137	11.334	12.474	9.326	9.244	9.769	12.156	10.807	9.332	9.69	10.798	9.702	11.656	9.236	8.588	10.521	10.302	3.97261	12.5208	12.2289	7.82175	4.31318	3.72214	0	37.1276	22.913	40.1209	13.4123	9.46859	13.2209	17.4196	30.2981
Koike_CLKBMAL1_P2500	AR_G529	3_AR529	intron	2.81814	11.4969	5.79875	11.0574	14.0464	9.13422	1100001G20Rik	5.814	5.976	12.198	9.041	14.541	9.182	10.249	5.467	10.111	10.202	7.042	9.787	553.774	338.911	391.528	364.895	389.229	327.046	523.766	331.674	317.395	359.921	390.848	544.441	23.8767	6.61098	12.723	9.45982	5.54552	3.72214	1.70073	21.0208	8.91063	10.7684	6.70615	3.1562	0	8.7098	0
Koike_CLKBMAL1_P2504	AR_G530	3_AR530	intron	23.3705	33.0228	6.15023	11.9615	0.857413	4.44365	Ssbp3	6.43	4.493	2.891	5.415	4.902	4.072	5.187	5.96	3.288	3.981	3.685	3.021	8.421	6.576	5.983	6.269	6.112	7.475	7.148	7.123	5.651	6.346	7.089	7.801	0.102952	6.61098	8.96788	8.55888	8.70105	0.744427	0.572694	15.0148	18.1684	22.9262	13.4123	6.59932	31.7303	17.4196	0
Koike_CLKBMAL1_P2512	AR_G531	3_AR531	TSS	5.59999	34.6354	3.49004	13.3774	4.91343	19.3009	Nktr	18.311	17.101	18.926	15.021	22.823	18.892	21.934	15.176	27.996	20.278	12.645	22.509	4.302	4.226	4.084	5.1	4.27	4.617	4.745	4.454	3.961	5.447	4.158	5.52	19.2246	13.222	13.8595	7.6989	5.13474	0.744427	0	9.4639	42.0073	22.9262	20.1184	6.40804	19.1503	34.8392	37.8727
Koike_CLKBMAL1_P2518	AR_G532	3_AR532	intron	8.0513	25.9308	6.20688	11.4576	11.5251	41.2392	Slc17a2	23.445	38.818	37.241	37.171	31.525	26.148	32.007	46.632	55.538	51.867	59.423	55.055	42.103	39.874	43.712	46.403	48.749	43.502	44.682	40.02	36.433	49.741	49.625	50.774	18.5191	12.6543	13.6124	9.86933	9.74667	4.46656	1.71808	9.0089	17.8213	31.5235	16.1557	12.6248	10.5768	29.8245	15.1491
Koike_CLKBMAL1_P2521	AR_G533	3_AR533	intron	2.06333	33.8694	6.99565	14.18	1.74562	7.14336	Derl1	8.758	7.284	8.036	5.335	9.603	7.148	8.397	7.682	6.782	6.582	3.996	6.116	35.667	35.585	27.829	31.58	27.023	28.945	32.946	32.928	30.056	31.794	27.459	31.258	4.47319	9.91647	8.96788	7.20748	9.24253	8.1887	2.51638	33.0326	17.4741	20.0604	20.1184	3.1562	26.4419	43.549	75.7453
Koike_CLKBMAL1_P2527	AR_G534	3_AR534	intron	8.6628	41.8673	5.49625	18.8088	0.529497	17.1101	Raf1	17.395	16.459	13.97	15.731	15.648	17.831	20.61	19.68	18.141	16.929	13.461	19.465	13.39	14.153	10.773	12.448	14.162	16.003	15.678	14.196	11.843	12.158	15.845	15.37	22.7742	9.91647	18.924	17.459	10.0081	5.21099	4.00886	15.0148	26.5004	37.2551	40.2369	7.89049	10.5768	61.2325	68.1708
Koike_CLKBMAL1_P2545	AR_G535	3_AR535	intergenic-10kbless	5.90486	43.663	3.0914	14.4577	5.52266	4.85726	Krcc1	3.471	5.071	6.724	4.528	2.062	4.846	6.51	4.807	10.001	2.719	3.155	4.393	30.716	27.565	26.906	25.998	23.558	33.107	28.51	27.577	29.386	25.341	21.324	30.873	2.5017	13.222	14.3536	6.30654	5.4895	4.89517	3.43616	21.0208	59.7128	25.792	27.4342	7.31664	6.33003	34.8392	30.2981
Koike_CLKBMAL1_P2547	AR_G536	3_AR536	TSS	3.99468	29.2832	3.0804	13.6405	10.4477	118.673	Cyp2d13	65.446	138.8	116.207	136.225	128.588	103.442	125.754	131.641	99.839	178.231	101.098	98.807	35.83	50.665	43.922	54.885	46.093	43.78	36.767	46.464	36.612	53.805	54.819	39.927	14.6265	24.7077	24.4084	10.8522	7.45004	3.72214	4.70303	45.0445	31.708	28.9183	26.8246	15.9723	20.833	8.70978	30.2981
Koike_CLKBMAL1_P2549	AR_G537	3_AR537	TSS	4.04508	49.9487	3.1204	14.9223	9.8728	5.18158	Klhdc3	3.941	5.513	5.541	6.002	5.362	4.383	4.997	6.045	4.533	7.522	4.77	3.57	11.094	13.073	9.744	9.318	12.192	11.186	12.235	12.447	11.776	11.69	11.481	11.509	2.5757	13.222	10.5984	5.85608	4.31318	7.44427	1.14539	28.1187	49.6449	28.6578	11.0753	9.46859	15.5446	69.6783	22.7236
Koike_CLKBMAL1_P2550	AR_G538	3_AR538	intron	5.04832	13.8704	8.69999	4.62073	11.9904	42.9589	Creb3l3	34.89	40.999	47.65	52.995	39.33	46.121	37.107	37.693	36.517	64.927	38.23	39.048	75.836	80.175	83.839	90.888	81.017	80.53	85.844	77.792	78.824	88.113	79.681	74.403	13.2755	2.50416	8.47378	8.10841	9.8587	3.72214	4.00886	18.0178	34.3696	24.0552	22.8619	12.6248	10.5768	17.4196	22.7236
Koike_CLKBMAL1_P2562	AR_G539	3_AR539	intron	5.5967	35.995	6.09713	13.9039	12.7768	12.0666	Epas1	6.482	11.476	10.622	11.969	16.498	12.276	11.413	14.231	9.241	20.688	9.054	10.85	13.013	19.237	13.976	11.693	14.795	11.306	16.526	19.949	17.446	16.53	16.331	12.206	7.61712	18.8647	9.26434	13.0363	12.9209	2.23328	3.1932	46.4095	11.4565	25.792	28.0439	12.6248	13.2209	41.1736	22.7236
Koike_CLKBMAL1_P2564	AR_G540	3_AR540	TSS	4.25493	39.5565	1.71998	11.1095	22.7178	4.20532	Uqcrq	4.82	5.02	5.766	4.314	5.866	6.128	2.768	3.668	3.239	2.782	2.533	3.56	56.545	59.687	59.071	60.355	60.478	58.547	54.834	68.206	66.519	56.096	59.349	56.866	9.41323	15.0249	7.51029	7.56239	7.89816	3.6319	5.15424	27.0267	27.1948	27.5288	33.5307	14.2985	30.4482	117.714	36.0364
Koike_CLKBMAL1_P2565	AR_G541	3_AR541	intron	0.936372	28.6752	2.52865	14.2413	23.6768	6.95116	Ric8b	7.035	6.307	6.611	5.276	5.696	8.2	7.777	7.837	7.662	5.869	6.065	9.079	2.848	2.143	2.751	2.834	3.06	2.453	3.314	2.028	1.984	2.307	3.269	2.674	20.2384	16.8613	9.78314	5.47386	8.73839	5.95542	4.00886	30.0297	22.913	13.8947	11.2785	11.0467	15.8651	34.8392	44.7585
Koike_CLKBMAL1_P2582	AR_G542	3_AR542	intron	0.976172	25.7187	4.28416	14.6836	22.9979	7.41657	Psmb7	8.327	7.342	7.434	5.172	7.977	8.201	7.756	6.999	8.196	6.025	6.408	9.162	20.744	19.481	20.387	20.023	19.999	19.161	20.971	20.658	21.687	18.242	17.74	17.751	6.83113	8.81464	13.983	9.48712	6.03098	4.46656	3.78325	27.0267	19.0942	25.792	3.35307	6.31239	21.1535	0	7.57453
Koike_CLKBMAL1_P2583	AR_G543	3_AR543	intron	9.19847	30.2816	7.09565	15.9503	4.16951	4.34237	Ocln	2.341	5.563	4.277	4.365	2.901	4.661	3.697	9.23	3.69	4.067	2.011	5.306	4.808	3.808	2.264	3.51	3.138	5.103	2.828	2.956	2.432	3.137	3.993	3.728	22.4257	10.1836	9.78314	14.4013	6.77785	8.1887	3.54029	27.0267	15.2754	21.1894	40.2369	6.31239	2.64419	26.1294	22.7236
Koike_CLKBMAL1_P2597	AR_G544	3_AR544	TSS	23.7748	57.2589	2.58185	10.1683	7.72346	8.03333	Polr3a	6.246	8.686	7.416	8.832	7.363	7.779	9.099	8.577	9.072	9.039	7.027	7.265	1.679	2.169	2.091	2.181	2.084	1.998	1.969	2.145	2.113	1.81	2.234	2.299	15.0479	12.1201	11.4137	3.59009	1.84851	1.48885	1.14539	36.0356	37.3784	20.0604	26.8246	7.89049	39.6628	8.70978	53.0217
Koike_CLKBMAL1_P2598	AR_G545	3_AR545	TSS	2.86657	42.8237	3.14472	11.4542	14.8939	7.6104	Igfals	12.586	5.577	4.478	8.264	9.115	2.68	8.036	5.936	7.73	8.871	14.555	3.496	47.154	25.043	57.177	48.054	47.515	46.379	48.603	34.565	34.337	56.959	49.281	51.82	17.8118	11.0183	9.78314	7.6989	1.84851	2.97771	1.71808	33.0326	11.4565	28.6578	23.4715	3.1562	21.1535	34.8392	15.1491
Koike_CLKBMAL1_P2602	AR_G546	3_AR546	intron	4.90637	32.9729	4.17199	16.6226	20.6761	6.98426	Arid1b	7.555	7.279	6.862	8.03	6.869	6.889	7.653	6.455	6.033	6.793	7.13	6.262	1.942	2.323	1.817	1.764	1.99	2.054	2.191	1.799	1.742	1.874	1.891	2.366	0.188502	14.3238	21.4439	13.787	5.54552	5.75239	1.14539	21.0208	42.0073	25.792	26.8246	4.73429	13.2209	43.5489	15.1491
Koike_CLKBMAL1_P2603	AR_G547	3_AR547	TSS	5.74704	39.0854	5.29438	9.16956	20.2867	10.8671	Ticam1	15.965	9.87	10.53	11.97	15.335	13.355	11.194	8.719	8.023	10.218	7.61	7.616	5.568	5.233	4.44	4.246	4.353	4.375	5.138	4.575	3.42	4.904	3.226	4.582	3.1292	8.81464	5.70683	8.84554	5.54552	3.72214	1.89162	21.0208	30.5507	22.9262	33.5307	4.73429	21.1535	69.6783	15.1491
Koike_CLKBMAL1_P2607	AR_G548	3_AR548	intergenic-10kbless	3.76007	19.7372	3.46501	16.7241	1.00964	43.7668	Cyp8b1	43.23	32.223	52.377	72.671	22.342	47.244	48.003	48.513	36.446	29.549	20.14	72.463	92.91	140.742	74.438	131.781	173.449	193.283	85.101	110.934	154.869	153.398	154.657	117.1	17.4969	16.5274	12.2289	12.6131	8.9998	7.89544	4.58155	24.0237	22.913	28.6578	34.3436	14.7289	15.8651	78.3881	37.8726
Koike_CLKBMAL1_P2609	AR_G549	3_AR549	intron	6.71413	27.5814	4.02978	11.5204	9.85975	41.4414	Phyh	22.636	42.97	46.52	84.795	22.007	31.28	38.96	47.177	40.906	51.278	42.54	26.227	690.359	604.042	728.639	661.542	675.531	623.535	621.181	650.163	671.613	716.304	607.046	637.869	11.8303	10.0834	13.8595	7.68525	3.00616	3.6319	2.62051	21.0208	11.4565	25.792	16.7654	9.46859	2.64419	17.4196	7.57453
Koike_CLKBMAL1_P2610	AR_G550	3_AR550	TSS	8.4935	16.2336	3.43442	10.149	1.3718	35.3937	Abca1	41.927	37.467	31.808	27.142	35.016	33.287	41.239	38.146	43.212	25.612	36.033	33.836	21.792	21.085	20.774	18.968	17.036	18.952	24.87	18.083	20.178	18.947	18.974	19.774	3.78959	9.91647	13.0442	7.56239	2.446	7.44427	1.14539	0	19.0942	11.4631	23.4715	0	7.93257	52.2587	15.1491
Koike_CLKBMAL1_P2616	AR_G551	3_AR551	TTS	8.3929	34.7241	4.76798	13.1028	12.8294	48.2774	Vegfa	32.964	39.089	35.046	65.075	62.923	42.261	47.392	50.873	38.952	86.485	42.092	36.175	18.869	25.2	23.434	19.984	20.964	19.486	18.41	27.39	21.277	24.508	25.033	25.182	10.2947	8.81464	12.2289	9.30966	7.56207	1.48885	3.26262	15.0148	19.0942	40.1209	26.8246	7.36446	15.8651	17.4196	15.1491
Koike_CLKBMAL1_P2623	AR_G552	3_AR552	intron	6.84906	43.1802	2.93033	8.68347	11.005	12.4051	Ttc7	13.67	12.846	18.042	10.805	14.128	13.533	11.989	9.635	9.479	13.324	12.445	8.964	7.087	9.612	7.597	7.896	6.804	6.617	6.104	9.988	6.893	7.707	5.592	7.558	7.39934	11.7195	5.70683	8.19032	6.46043	4.10563	1.64866	27.0267	19.0942	22.9262	30.1777	9.46859	10.1761	17.4196	43.3814
Koike_CLKBMAL1_P2633	AR_G553	3_AR553	intergenic-10kbless	6.63326	29.5164	6.65379	9.5396	10.5539	9.29198	Ubp1	8.107	9.555	8.664	11.004	7.759	8.223	9.868	10.153	7.383	13.342	9.479	7.968	8.788	11.153	11.085	12.561	11.965	9.8	10.129	12.384	11.805	10.237	10.612	9.444	11.509	5.50915	11.4137	9.43252	6.06833	5.95542	2.22136	21.0208	22.913	20.0604	26.8246	1.5781	10.5768	43.549	45.4472
Koike_CLKBMAL1_P2638	AR_G554	3_AR554	intron	2.91331	22.4004	2.36264	13.4468	5.63883	21.2894	A430107O13Rik	17.512	23.557	18.695	22.09	17.839	20.145	21.416	22.766	27.683	18.889	20.706	24.173	9.126	8.791	8.403	9.848	8.615	9.592	11.297	9.107	10.478	8.993	9.67	9.447	0.811396	16.5274	7.33736	7.20748	6.16169	3.72214	2.15194	21.0208	11.4565	14.3289	6.70615	14.2029	10.5768	60.9685	15.1491
Koike_CLKBMAL1_P2652	AR_G555	3_AR555	TSS	7.16543	19.44	2.34898	13.8555	4.43625	25.7164	Atxn2	20.46	35.25	26.316	28.464	15.341	25.771	31.017	35.561	22.61	26.427	19.437	21.942	7.043	8.14	5.588	7.799	7.103	7.279	7.503	9.637	6.086	7.124	8.096	6.525	2.7402	15.4256	18.4793	4.95514	3.08084	1.48885	1.71808	9.0089	15.2754	31.5235	20.1184	7.79485	2.64419	0	22.7236
Koike_CLKBMAL1_P2673	AR_G556	3_AR556	intergenic-10kbless	8.05365	39.6258	4.08967	21.4283	5.73315	3.33312	Adora1	2.185	4.326	10.459	2.541	1.383	3.459	4.882	3.365	2.696	2.046	1.304	1.35	1.525	7.226	5.033	6.664	3.783	4.048	2.361	8.577	7.088	4.223	2.726	4.774	9.34387	19.8329	25.4213	19.3701	8.70105	10.1287	5.57075	48.0475	26.7319	28.6578	38.3063	17.3591	15.8651	104.517	45.4472
Koike_CLKBMAL1_P2676	AR_G557	3_AR557	intron	4.47343	24.3061	4.851	11.9378	12.963	8.38118	Lrrfip1	6.555	8.072	9.099	10.462	8.841	9.026	8.185	8.685	5.862	10.514	7.164	8.107	5.834	5.122	4.261	5.847	4.791	5.019	4.919	4.533	4.394	4.969	5.26	5.123	21.0988	9.91647	22.7779	12.2718	8.533	8.77522	2.29078	34.6706	30.7822	34.3893	16.7654	17.3591	7.61206	43.549	30.2981
Koike_CLKBMAL1_P2678	AR_G558	3_AR558	intron	9.14392	42.8663	7.63256	12.9956	2.93003	19.7423	Apoc2	16.598	25.828	18.436	19.095	24.452	21.824	24.361	29.914	13.296	20.921	5.642	16.54	132.861	127.164	124.622	135.115	145.143	147.325	114.225	142.433	149.454	119.047	103.344	133.515	6.07272	8.81464	6.47269	10.8112	6.77785	6.92543	3.41881	18.0178	22.913	24.3157	40.2369	12.6248	10.5768	26.1294	7.57453
Koike_CLKBMAL1_P2713	AR_G559	3_AR559	intergenic-10kbless	5.40311	29.8521	2.14951	10.3256	16.4863	24.7648	Zfp809	26.629	19.232	15.182	24.59	23.424	30.649	24.31	18.246	35.327	23.893	35.295	20.402	11.664	6.576	13.53	12.061	9.97	7.584	17.793	10.617	11.294	10.244	7.729	10.376	5.85355	13.222	6.5221	8.95475	4.4999	0	6.26492	21.0208	36.2211	25.792	10.0592	3.1562	7.93257	17.4196	22.7236
Koike_CLKBMAL1_P2714	AR_G560	3_AR560	intron	2.18643	27.3832	6.46361	12.7151	11.6356	21.8607	AK020095	15.476	19.276	25.715	33.209	22.459	22.205	20.197	21.127	18.021	28.148	17.739	18.756	19.387	18.617	21	22.084	18.277	17.051	18.704	16.741	14.933	23.698	21.437	18.439	15.2376	7.71281	10.5984	11.2617	9.9894	2.23328	3.3841	27.0267	11.4565	17.1947	6.70615	3.44312	13.2209	0	15.1491
Koike_CLKBMAL1_P2728	AR_G561	3_AR561	intron	3.12667	33.5356	3.66471	14.2458	1.36807	39.8373	Sc5d	28.668	39.769	32.545	16.505	27.346	76.009	63.313	51.176	66.805	26.046	8.711	41.154	109.408	217.16	119.269	88.605	83.77	161.819	117.034	180.913	191.263	104.165	150.635	113.138	6.03175	15.4256	12.5254	10.3608	3.69701	4.46656	2.29078	42.0415	38.1884	17.1947	13.6155	3.20402	10.5768	43.5489	15.1491
Koike_CLKBMAL1_P2734	AR_G562	3_AR562	intron	8.01249	54.0225	7.46233	15.6239	22.4498	8.85519	Myo10	9.918	8.817	8.804	8.752	10.483	9.564	10.662	8.779	7.299	7.683	8.456	7.045	2.639	4.244	3.165	4.355	3.783	3.577	3.443	4.372	3.726	3.815	3.664	3.929	12.5428	10.8514	9.78314	18.3736	11.1657	3.13562	2.68993	21.0208	34.3696	55.8392	41.8626	10.951	10.5768	28.7687	35.8069
Koike_CLKBMAL1_P2753	AR_G563	3_AR563	TSS	1.72774	43.4518	3.75492	7.70002	11.5554	8.60821	Zfp106	8.113	8.045	7.164	8.745	8.996	7.754	10.068	7.984	9.232	11.874	7.019	8.305	8.553	8.219	9.162	9.291	9.568	8.32	8.836	9.17	9.14	9.811	8.666	9.071	13.9158	8.81464	12.4266	6.3202	4.31318	2.72957	2.29078	27.7547	34.3696	31.5235	13.4123	11.4771	34.3745	52.2588	37.8726
Koike_CLKBMAL1_P2760	AR_G564	3_AR564	intron	5.79198	33.738	7.24916	16.3273	2.59173	7.71273	Mfn1	7.365	9.737	5.974	6.27	5.438	8.166	8.842	8.817	8.008	9.074	7.572	7.29	10.129	10.523	10.246	10.195	9.356	9.612	10.321	10.5	10.359	9.581	9.656	8.986	7.26707	9.91647	10.5984	10.8112	11.7072	7.44427	3.8006	18.0178	19.0942	31.5235	10.0592	6.31239	5.28838	17.4196	7.57453
Koike_CLKBMAL1_P2766	AR_G565	3_AR565	intron	3.89105	43.9006	4.61244	13.8883	22.3389	7.88524	Cdc42bpa	8.409	7.928	5.525	8.036	6.722	14.961	9.04	7.823	7.616	5.395	4.921	8.244	2.975	3.966	3.21	3.212	3.476	3.03	3.561	3.219	3.24	2.911	3.192	2.952	6.18986	14.257	10.5984	8.08111	8.01019	4.19586	1.71808	41.2226	15.2754	20.0604	23.4715	6.31239	7.93257	8.70978	15.1491
Koike_CLKBMAL1_P2772	AR_G566	3_AR566	intron	11.5	24.9468	7.59888	8.21097	14.4189	7.92267	Dap	7.595	4.839	5.902	15.26	11.821	7.343	7.499	7.077	5.051	8.235	9.742	4.708	142.224	78.489	112.131	102.248	105.641	108.937	120.309	85.54	95.391	85.949	108.083	132.926	22.8325	5.50915	3.26105	11.2617	6.16169	4.46656	2.18665	6.00593	10.6465	20.0604	33.5307	12.8639	7.93257	8.70978	7.57453
Koike_CLKBMAL1_P2774	AR_G567	3_AR567	intron	4.90227	32.4999	3.54701	14.2196	9.08308	17.579	Ttpa	4.401	19.081	21.839	11.746	10.537	20.051	9.614	21.341	24.184	22.47	13.799	31.886	95.103	137.26	145.447	159.59	161.7	134.76	68.743	133.544	151.583	110.186	131.721	106.987	13.2634	15.0583	9.11611	9.37791	8.64503	5.95542	4.00886	27.0267	42.0073	37.2551	36.4774	7.89049	13.2209	25.3376	7.57453
Koike_CLKBMAL1_P2778	AR_G568	3_AR568	intron	4.87335	40.2817	5.49038	10.0676	3.46595	28.6223	Gls2	22.855	35.951	20.656	39.884	19.8	36.66	27.563	53.683	15.687	30.063	16.351	24.315	83.406	82.726	95.304	85.425	68.865	85.454	70.395	95.433	75.053	69.13	89.58	71.305	7.69559	7.21198	13.0442	8.17667	4.31318	4.46656	3.43616	39.8576	28.6992	60.4418	23.4715	20.5153	26.4419	121.937	49.8083
Koike_CLKBMAL1_P2780	AR_G569	3_AR569	intron	16.9229	44.2438	4.20614	9.86545	9.90031	13.8887	Slc24a6	7.637	11.547	21.662	27.539	10.966	9.424	8.094	23.182	6.07	20.179	11.604	8.761	11.545	8.377	7.326	7.064	7.158	5.723	9.764	8.186	6.341	7.18	11.548	9.114	0.429073	7.71281	13.0442	10.47	5.54552	1.48885	3.43616	27.0267	19.0942	11.4631	36.8838	14.2029	26.4419	43.549	53.0217
Koike_CLKBMAL1_P2799	AR_G570	3_AR570	intergenic-10kbless	6.47223	43.3272	4.06745	16.3675	10.7568	107.002	Apoa5	92.35	75.671	87.214	232.801	69.726	62.664	71.871	99.853	176.382	104.765	130.816	79.911	218.617	337.683	432.34	404.584	485.692	281.456	319.989	396.016	512.439	263.356	335.856	254.97	11.578	17.6293	17.244	13.0636	6.47911	4.46656	1.71808	51.0504	38.1884	25.792	46.943	9.56423	15.8651	52.2587	15.1491
Koike_CLKBMAL1_P2801	AR_G571	3_AR571	intron	8.43862	52.0768	8.47818	17.8986	12.8473	9.10882	Ubap1	8.919	9.49	9.325	11.938	8.077	9.577	8.728	8.644	6.934	10.274	8.365	9.036	11.341	12.029	10.622	12.175	10.058	9.172	11.459	12.65	11.544	9.504	10.756	10.924	6.57062	7.47909	8.15262	22.5234	16.0204	5.21099	3.43616	27.0267	22.913	40.1209	46.943	12.6248	18.5093	26.1294	53.0217
Koike_CLKBMAL1_P2808	AR_G572	3_AR572	intron	5.58235	30.5436	7.08094	18.0153	2.80026	11.7198	Nit2	9.216	12.287	10.963	8.911	7.776	14.453	14.026	14.498	18.857	8.285	6.037	15.328	54.48	60.429	54.882	52.104	53.83	62.2	46.375	57.319	50.762	46.458	54.706	57.22	0.933543	4.40732	19.5663	14.5378	8.34628	8.1887	2.29078	24.0237	11.4565	40.1209	3.6579	4.73429	7.93257	26.1294	7.57453
Koike_CLKBMAL1_P2809	AR_G573	3_AR573	TSS	8.17204	33.0927	4.58574	10.5462	17.1698	8.86663	Mcfd2	8.536	7.413	6.005	6.816	18.235	10.11	8.851	4.626	4.486	13.998	6.371	10.952	79.877	72.501	67.45	80.603	77.209	84.718	75.215	73.132	79.494	75.423	88.349	82.149	19.8965	9.91647	12.3277	9.00935	3.69701	4.46656	2.29078	22.9318	22.913	37.2551	39.7288	4.73429	2.64419	52.2588	12.1652
Koike_CLKBMAL1_P2824	AR_G574	3_AR574	intergenic-10kbless	6.21418	23.8217	5.60807	9.68422	19.1369	10.7569	Mef2d	11.869	9.631	7.861	14.84	12.409	13.667	11.415	12.022	5.497	10.598	9.513	9.761	3.801	3.913	3.305	3.721	4.082	3.294	3.92	3.189	3.35	3.592	4.299	4.326	20.4906	13.7896	32.0176	14.2512	5.30278	8.66243	4.77245	50.5955	53.0009	45.8524	34.8516	6.88625	6.00952	25.0736	45.4472
Koike_CLKBMAL1_P2827	AR_G575	3_AR575	exon	6.67245	44.0886	2.43803	13.455	9.62325	5.97787	Anapc5	4.217	5.836	6.638	6.933	6.186	5.492	6.558	7.327	4.512	7.737	4.733	5.568	7.987	8.043	8.305	8.674	8.809	7.731	6.991	8.589	9.966	7.719	8.909	8.078	12.634	13.222	11.5372	6.89352	3.47295	3.72214	2.86347	24.0237	26.7319	37.2551	28.7552	3.1562	15.8651	26.1294	15.1491
Koike_CLKBMAL1_P2833	AR_G576	3_AR576	intron	8.19923	43.0519	6.08308	12.9789	3.5031	60.822	Col18a1	45.595	70.409	48.198	77.058	67.272	69.969	68.997	86.615	29.381	80.011	34.474	51.885	84.294	94.729	76.421	79.559	81.917	93.877	85.69	87.942	71.676	84.292	92.413	92.487	23.2426	9.28208	17.0958	13.0636	7.84215	9.99337	4.00886	36.0356	17.3584	42.4656	44.4028	15.781	23.7977	56.7456	90.8944
Koike_CLKBMAL1_P2838	AR_G577	3_AR577	intergenic-10kbless	6.2061	37.4001	3.24677	16.6377	23.2784	16.504	Agxt	11.886	15.912	3.922	13.83	15.285	31.452	18.957	44.89	2.571	6.071	5.226	28.047	81.124	70.925	62.767	115.133	54.861	73.893	84.513	72.266	45.961	58.094	62.518	82.164	23.8173	20.9348	23.6426	8.16302	6.16169	7.44427	1.80485	24.0237	53.4638	25.792	23.4715	15.781	5.28838	26.1294	37.8726
Koike_CLKBMAL1_P2840	AR_G578	3_AR578	TSS	8.50455	33.8391	7.11282	11.5212	21.1006	13.4387	F10	13.309	11.117	11.686	12.686	17.785	14.624	16.247	16.553	11.478	13.424	11.708	10.648	117.712	84.027	104.563	100.306	98.134	95.791	111.95	88.967	85.284	111.362	106.838	118.48	21.0819	8.81464	15.1441	14.2239	11.7072	2.97771	2.3949	12.0119	38.1884	40.4682	43.59	9.46859	15.8651	26.1294	30.5276
Koike_CLKBMAL1_P2842	AR_G579	3_AR579	exon	2.73074	27.2942	4.74317	8.09558	6.28981	16.1009	Ndufs7	14.82	16.074	33.205	15.789	13.769	16.629	16.347	19.594	13.365	14.666	8.333	10.621	33.502	27.122	32.796	28.449	29.412	27.65	27.419	31.036	28.718	29.659	29.252	29.923	7.25275	4.40732	11.4137	6.79796	3.08084	3.72214	0.711529	30.0297	20.7143	20.0604	6.70615	0	7.93257	52.2588	30.2981
Koike_CLKBMAL1_P2844	AR_G580	3_AR580	TTS	3.15256	38.397	6.321	12.8585	15.7838	45.4127	Serpina10	27.878	32.389	37.13	28.215	82.12	28.918	34.94	43.297	25.204	39.647	136.103	29.11	162.807	61.514	72.017	92.13	67.312	76.089	144.72	70.822	65.08	80.896	79.567	133.097	0.354726	4.40732	11.4137	12.2855	6.90856	1.51141	3.0023	30.0297	30.5507	11.4631	20.1184	1.5781	7.93257	17.4196	7.57453
Koike_CLKBMAL1_P2853	AR_G581	3_AR581	TSS	1.46861	48.2112	3.76318	12.8022	8.17762	6.08898	Zfp263	5.459	6.52	5.998	5.633	7.281	5.431	6.99	7.072	5.034	7.55	5.677	4.424	2.124	2.048	2.576	2.604	1.855	2.109	2.871	2.483	1.542	2.118	2.15	2.404	2.58615	13.222	8.96788	8.10841	3.08084	4.46656	0	18.0178	26.7319	30.3078	16.7654	14.6333	34.3745	43.5489	30.2981
Koike_CLKBMAL1_P2865	AR_G582	3_AR582	intergenic-10kbless	3.58527	22.8645	3.28132	13.0323	4.30296	57.8975	Gpam	45.255	55.108	50.101	15.83	36.624	95.006	91.102	40.233	178.901	39.137	7.611	39.861	19.014	94.595	32.646	33.635	43.092	50.447	21.503	84.84	104.344	42.571	35.29	34.099	8.32633	21.5691	17.1205	17.1178	6.87121	7.44427	3.43616	32.0317	42.0073	25.0104	30.4825	12.6248	17.1472	34.8392	53.0217
Koike_CLKBMAL1_P2867	AR_G583	3_AR583	intron	2.24592	35.7489	6.15191	11.5843	3.81714	20.6744	Nr5a2	13.222	26.097	17.501	23.25	18.036	22.892	22.699	27.648	20.1	20.767	12.25	23.632	7.876	12.115	9.075	9.866	10.322	11.617	8.415	10.849	9.48	11.218	11.446	11.152	17.4253	9.54919	7.38677	6.49765	10.4749	5.21099	3.12378	24.0237	19.0942	17.9762	22.3538	4.73429	22.6759	17.4196	22.7236
Koike_CLKBMAL1_P2877	AR_G584	3_AR584	TSS	0.808172	13.5539	2.35337	8.81233	3.08871	9.53013	Hsd17b12	9.29	8.014	10.113	3.227	5.366	12.241	10.412	6.719	22.25	5.997	8.231	12.504	56.721	69.792	55.472	53.606	60.993	62.115	52.618	70.055	82.287	46.382	51.51	46.702	7.33661	15.4924	2.96459	8.55888	4.31318	3.27097	0.572694	35.0346	7.63768	15.1105	10.0592	7.221	2.64419	34.8392	7.57453
Koike_CLKBMAL1_P2882	AR_G585	3_AR585	intron	7.70391	30.9534	3.37283	8.816	14.4963	9.26042	B4galnt1	6.251	11.105	7.028	8.797	15.421	8.328	8.827	11.424	3.76	15.531	6.151	8.502	17.56	13.514	10.107	15.81	13.406	13.59	15.387	14.64	10.648	13.675	17.242	14.828	22.3003	7.71281	8.96788	5.40561	1.77382	3.72214	1.31893	15.1968	26.7319	15.8052	20.1184	14.2029	10.5768	31.1441	15.149
Koike_CLKBMAL1_P2896	AR_G586	3_AR586	intron	2.68637	46.0173	4.11378	8.37314	9.4237	13.2535	Spata2L	13.516	13.62	15.47	20.329	12.377	13.483	13.119	11.903	10.936	16.562	7.755	9.971	6.266	6	7.507	7.469	6.499	5.349	3.019	5.864	5.88	4.944	4.356	3.687	11.0636	5.50915	9.78314	7.20748	2.46467	6.69985	1.14539	33.0326	30.5507	26.8341	13.4123	6.31239	18.5093	26.1294	29.6095
Koike_CLKBMAL1_P2898	AR_G587	3_AR587	intergenic-10kbless	4.78586	26.9159	10.5003	13.0763	4.91756	6.41778	Vprbp	5.659	7.488	5.382	6.245	5.157	5.858	7.468	7.192	8.008	7.4	4.567	6.588	3.673	3.89	3.773	3.721	3.754	4.363	4.492	4.338	4.389	3.941	3.61	3.654	5.0249	6.61098	4.89157	9.45982	13.9478	6.79008	3.43616	30.0297	3.81884	31.5235	13.4123	10.7119	13.2209	43.549	0
Koike_CLKBMAL1_P2900	AR_G588	3_AR588	intergenic-10kbless	5.11326	24.748	5.56702	13.0266	8.32315	10.3003	Chpt1	4.046	9.029	16.588	10.535	2.833	13.035	9.094	4.231	28.761	9.642	6.163	9.646	29.383	65.465	54.22	48.177	67.384	52.467	33.958	75.901	85.429	41.589	46.202	40.964	9.93887	7.77958	13.0195	10.9341	8.42097	7.44427	2.86347	36.0356	19.0942	39.1656	13.4123	3.1562	1.2019	0	30.2981
Koike_CLKBMAL1_P2901	AR_G589	3_AR589	TSS	4.17091	50.9471	5.89942	14.8245	4.75005	5.2086	0610007P14Rik	4.607	3.602	6.07	4.268	3.619	6.857	4.434	8.026	5.725	6.358	3.241	5.697	24.773	37.563	33.197	32.522	25.774	35.958	29.244	40.286	34.687	35.871	28.598	29.703	8.63742	11.4857	10.6725	13.5686	6.77785	1.48885	1.71808	45.0445	53.4638	45.8524	10.0592	6.83843	15.8651	31.408	22.7236
Koike_CLKBMAL1_P2903	AR_G590	3_AR590	intron	6.15012	25.9181	2.03409	12.4396	15.3858	67.0505	Adk	52.174	52.412	58.331	67.197	39.29	91.569	65.844	53.564	94.343	73.996	77.412	78.474	82.137	98.804	103.071	107.656	110.643	110.001	77.947	99.992	98.129	93.257	96.362	90.838	14.5712	14.3238	8.96788	5.93798	4.87333	3.72214	3.8006	9.0089	15.2754	25.792	8.94153	6.31239	10.5768	8.70978	15.1491
Koike_CLKBMAL1_P2905	AR_G591	3_AR591	intergenic-10kbless	7.96498	38.2428	7.22563	10.1133	3.80949	92.6539	Acaa1b	98.535	102.538	135.96	52.689	30.451	116.416	147.723	50.127	196.875	63.126	18.3	99.106	98.342	630.941	345.072	216.455	463.354	309.834	119.045	623.4	741.13	197.347	299.905	196.199	8.97064	5.50915	11.1172	8.65444	10.4749	3.18073	0	30.0297	22.913	34.3893	43.59	7.89049	23.7176	78.3881	75.7453
Koike_CLKBMAL1_P2907	AR_G592	3_AR592	intergenic-10kbless	3.90788	25.7021	3.56886	9.96398	0.321466	15.3743	Efna1	15.923	12.426	14.274	17.306	19.213	18.363	20.688	22.14	13.471	7.752	7.538	15.398	17.442	23.226	7.786	17.576	18.184	17.895	18.597	14.383	8.287	18.363	25.1	21.897	21.3143	13.222	17.1205	7.41224	5.54552	1.48885	0.572694	36.0356	34.3696	22.9262	10.0592	13.0552	9.53511	52.2588	22.7236
Koike_CLKBMAL1_P2909	AR_G593	3_AR593	TSS	6.99752	32.2456	5.05868	8.80558	10.3108	14.4206	F7	10.856	13.791	15.84	15.314	19.396	13.708	17.57	17.291	10.939	15.5	11.843	10.999	39.507	29.705	35.032	33.432	33.131	30.583	36.357	29.889	26.859	40.824	40.124	38.814	19.6944	11.0183	8.15262	9.45982	3.08084	2.21072	1.70073	24.0237	19.0942	33.9551	26.8246	4.0648	10.5768	17.4196	37.8726
Koike_CLKBMAL1_P2912	AR_G594	3_AR594	intron	4.94201	26.4008	3.2204	9.18472	12.1358	6.57343	Cdc42ep4	5.126	5.334	7.915	8.603	8.4	7.018	6.138	5.395	5.767	9.82	4.437	4.929	7.9	12.317	10.293	10.775	9.456	8.681	7.126	12.166	9.137	10.99	8.921	8.682	10.2463	13.222	8.64672	6.63416	4.92935	0.609077	0.572694	30.0297	15.2754	28.6578	10.0592	9.46859	2.64419	60.9686	22.7236
Koike_CLKBMAL1_P2914	AR_G595	3_AR595	intron	2.68824	52.5536	0.901781	10.1763	22.9891	5.70889	Ap1b1	6.556	5.48	5.755	5.5	6.096	5.937	6.724	5.855	4.541	5.742	5.328	4.993	10.478	8.863	8.655	10.217	9.554	9.864	10.412	8.862	8.901	10.501	9.175	10.527	21.2075	14.3238	7.33736	4.57293	2.46467	4.46656	2.86347	48.0475	26.7319	20.0604	23.4715	9.46859	7.93257	17.4196	15.1491
Koike_CLKBMAL1_P2915	AR_G596	3_AR596	TSS	4.96705	69.1675	8.46218	9.00035	6.66945	6.73309	Man2b1	5.092	8.906	7.967	7.942	6.876	5.846	8.045	8.272	4.77	8.428	4.109	4.545	11.787	12.811	12.693	11.631	13.4	11.065	12.638	16.196	13.247	12.599	12.32	10.188	8.27883	6.61098	3.26105	6.75701	6.77785	3.72214	2.86347	46.8645	45.8261	45.8524	33.5307	11.8596	10.2563	17.4196	22.7236
Koike_CLKBMAL1_P2920	AR_G597	3_AR597	intron	4.98431	39.1982	4.62481	11.5365	9.73097	9.51522	Dgkd	7.046	9.439	11.254	10.36	8.094	10.119	9.508	9.448	9.829	11.58	8.733	8.772	2.74	3.142	3.005	2.959	2.591	2.838	2.601	3.401	3.146	2.904	2.539	2.393	8.51765	7.71281	10.5984	9.45982	3.08084	3.83493	2.7767	27.0267	15.2754	25.792	20.1184	9.85116	10.5768	8.7098	22.7236
Koike_CLKBMAL1_P2923	AR_G598	3_AR598	TSS	8.17345	19.1527	4.10174	13.6447	8.67267	6.22646	Anpep	3.869	7.089	10.848	5.978	5.162	6.351	6.103	5.209	6.259	8.281	4.755	4.814	24.983	23.319	21.711	22.231	23.037	22.111	25.08	25.133	25.21	24.798	21.837	24.57	4.34063	12.1201	8.17732	10.8112	5.54552	5.95542	1.71808	6.00593	7.63768	34.3893	10.9737	3.92134	2.64419	0	20.4283
Koike_CLKBMAL1_P2925	AR_G599	3_AR599	intron	8.06545	34.4368	5.57292	12.7766	4.1313	14.1485	Pgm2	13.754	15.928	16.651	11.726	10.128	17.304	16.368	14.225	18.184	14.06	8.884	12.568	36.49	65.795	58.924	46.06	57.871	47.212	43.085	67.66	67.13	49.944	50.061	46.757	9.43716	9.91647	8.15262	11.2617	5.54552	3.72214	1.89162	9.0089	19.0942	31.5235	26.8246	3.1562	10.8171	26.1294	7.57453
Koike_CLKBMAL1_P2926	AR_G600	3_AR600	intron	1.66573	17.1694	4.21914	10.0656	13.2836	39.6409	Hpn	34.955	37.546	38.709	47.737	44.944	42.06	41.256	39.388	28.616	52.122	41.422	26.936	102.745	93.721	95.644	90.349	88.088	85.22	92.2	97.225	91.912	96.675	97.405	94.606	5.95242	7.71281	11.4137	5.77417	3.69701	2.23328	1.71808	27.9367	18.3999	8.59733	10.0592	4.73429	7.93257	0	7.57453
Koike_CLKBMAL1_P2927	AR_G601	3_AR601	TSS	6.51228	33.8736	5.40506	10.6716	5.79415	5.36528	Gcc2	4.632	5.094	5.38	4.472	4.528	5.544	5.784	5.487	8.378	5.142	4.491	5.452	6.193	5.089	4.648	5.162	4.82	4.816	5.362	5.274	5.454	4.388	5.01	4.512	4.06603	11.8864	6.44798	14.3604	7.52472	1.44374	4.07827	18.0178	22.913	34.3893	20.1184	9.56423	7.93257	8.7098	8.03359
Koike_CLKBMAL1_P2928	AR_G602	3_AR602	intron	8.85994	32.3977	7.55212	4.14689	6.91431	31.592	Reep6	29.948	32.849	47.685	33.495	19.07	32.63	39.689	25.06	36.374	42.61	17.773	21.922	190.659	280.622	239.663	237.835	280.944	223.359	208.2	310.84	337.118	253.141	255.128	193.557	10.5169	3.07177	7.36206	8.10841	5.07872	1.55653	2.29078	18.0178	23.3759	32.4788	23.4715	15.3984	13.2209	8.7098	30.2981
Koike_CLKBMAL1_P2933	AR_G603	3_AR603	intron	7.36956	42.1706	6.06894	14.0459	14.0078	15.616	Scarb2	12.902	15.845	15.903	20.578	15.104	18.482	15.928	14.826	12.65	16.566	13.176	15.434	36.298	34.202	38.583	43.569	37.526	39.039	39.423	39.053	35.718	42.158	32.635	32.594	12.1999	5.30882	14.6747	8.29952	7.95418	3.72214	2.29078	33.0326	15.2754	22.9262	36.8838	9.46859	25.7208	43.549	60.5962
Koike_CLKBMAL1_P2934	AR_G604	3_AR604	TSS	1.83031	32.7303	4.51298	6.46367	3.49448	8.78575	Tpp2	8.473	7.866	7.313	6.687	6.727	7.539	10.836	9.219	14.543	8.081	7.284	10.863	7.116	4.758	4.905	5.174	4.445	5.406	7.115	5.144	4.914	5.331	5.418	5.317	1.32541	11.8196	11.5125	10.3744	2.98748	3.72214	1.66602	30.0297	30.5507	17.1947	20.1184	9.46859	18.5093	26.1294	33.0525
Koike_CLKBMAL1_P2944	AR_G605	3_AR605	intergenic-10kbless	5.56528	15.9595	1.49336	6.8419	11.8947	46.1782	Nlrp6	29.202	46.996	28.242	73.761	50.823	30.797	54.371	60.461	22.018	83.51	49.103	24.853	31.351	31.843	31.589	40.811	27.103	28.696	28.691	29.618	23.039	38.41	33.807	31.079	14.9132	18.1635	11.7348	6.52495	5.09739	3.85749	4.89393	27.0267	19.3257	21.7973	16.7654	9.46859	11.0575	37.4785	23.8712
Koike_CLKBMAL1_P2954	AR_G606	3_AR606	TSS	7.70489	51.1048	3.33809	17.3235	0.841532	4.12073	Snrpa	6.681	4.555	3.745	3.667	5.071	2.582	4.92	4.036	3.504	3.451	3.863	3.376	6.694	7.251	6.908	6.156	8.037	6.597	6.956	6.676	6.547	7.737	7.884	8.498	19.4932	18.8647	23.9885	14.8518	9.20518	8.59475	4.00886	42.1325	44.4374	72.426	48.9752	17.2634	27.8842	45.1326	83.3197
Koike_CLKBMAL1_P2961	AR_G607	3_AR607	intron	7.70986	19.8991	7.31425	11.8365	0.0935073	6.21617	Raver1	6.104	7.056	6.194	6.137	5.881	7.129	6.693	6.121	4.863	7.238	5.068	6.11	5.109	3.888	4.59	5.245	4.112	4.703	4.619	4.061	4.22	4.129	4.143	4.41	22.2505	6.41064	7.85616	11.7122	8.01019	5.41402	4.23446	12.0119	19.0942	33.1735	16.7654	7.17317	2.64419	34.8392	30.2981
Koike_CLKBMAL1_P2981	AR_G608	3_AR608	intergenic-10kbless	5.51687	23.7161	3.46054	13.8133	7.77913	33.9296	Zfp36	24.185	28.94	45.967	47.206	20.62	35.106	38.69	27.787	50.355	32.241	16.866	39.194	19.139	41.334	30.791	17.754	21.282	18.28	16.874	40.192	34.267	28.191	37.501	23.966	8.94518	17.9298	37.5762	19.8615	9.84002	8.54963	5.05012	40.7676	45.9418	50.1077	9.34796	20.9457	15.5446	76.2767	23.6417
Koike_CLKBMAL1_P2986	AR_G609	3_AR609	TSS	3.37401	32.2349	6.92727	8.58493	19.5271	9.0232	Aars	8.82	11.531	6.587	8.596	10.764	9.216	9.936	8.054	6.913	9.885	9.749	8.227	30.697	21.2	19.723	26.603	22.801	25.838	30.167	21.545	19.598	28.517	23.875	30.286	22.2767	9.91647	5.87977	11.1252	7.16996	4.73726	2.204	23.1137	26.7319	20.0604	16.7654	7.89049	23.7977	0	30.2981
Koike_CLKBMAL1_P2991	AR_G610	3_AR610	intron	11.9516	22.9287	9.95812	8.43874	18.5589	12.2653	Prkaa2	21.224	9.425	8.487	10.178	8.533	7.87	10.735	8.572	18.436	9.69	23.609	10.424	8.091	10.077	10.891	9.423	9.975	9.035	9.496	12.549	13.83	10.036	11.761	8.848	10.3938	3.30549	6.57151	8.31317	7.50605	4.46656	3.43616	10.8289	3.81884	17.1947	36.8838	11.0467	18.91	17.4196	0
Koike_CLKBMAL1_P2999	AR_G611	3_AR611	intron	5.29962	27.6192	6.23404	8.93559	8.29653	6.34738	Pink1	5.479	8.371	7.587	9.756	7.814	6.311	8.386	9.817	5.875	8.759	6.122	7.171	42.125	56.596	50.942	49.281	55.254	50.522	41.167	63.477	61.313	46.519	47.486	48.432	9.43852	6.2437	11.4137	9.36426	5.78825	2.23328	1.24951	12.0119	42.0073	22.9262	10.0592	7.89049	2.64419	52.2587	7.57453
Koike_CLKBMAL1_P3001	AR_G612	3_AR612	intron	11.5737	33.1205	6.52374	15.7081	0.909459	9.11852	Gtf2i	8.013	11.042	8.311	8.613	9.59	9.707	10.2	9.903	7.089	10.639	7.338	8.978	13.65	14.795	12.571	14.479	13.17	14.593	14.183	14.561	12.32	13.231	12.914	14.04	1.57348	8.81464	11.636	10.4563	10.4749	5.95542	1.14539	15.0148	20.83	20.0604	26.8246	17.4069	21.1535	17.4196	7.57453
Koike_CLKBMAL1_P3002	AR_G613	3_AR613	intron	4.31315	9.14857	9.70816	9.90512	11.9386	6.01746	Zfp710	5.857	6.617	8.399	7.806	7.246	6.109	5.263	5.144	2.651	7.747	4.621	4.75	2.82	2.473	2.124	2.561	2.316	1.707	3.085	2.617	1.952	3.069	3.138	3.348	21.7735	3.30549	5.70683	9.84203	6.46043	5.86518	1.71808	12.0119	3.81884	5.73155	22.2522	4.01698	10.5768	17.4196	22.7236
Koike_CLKBMAL1_P3004	AR_G614	3_AR614	TSS	0.163449	29.6149	3.32404	13.2541	4.18865	11.7412	Ube2b	11.854	10.165	13.961	10.232	7.756	10.884	14.029	11.925	17.913	9.231	9.061	13.883	37.342	36.556	35.476	31.689	28.913	33.184	33.298	36.557	35.799	27.139	31.749	31.157	5.26965	12.1201	19.5169	6.75701	2.55803	2.23328	1.21481	24.0237	19.0942	11.4631	20.1184	4.73429	21.1535	26.1294	15.1491
Koike_CLKBMAL1_P3009	AR_G615	3_AR615	TSS	2.37264	29.4847	0.717138	9.54119	11.1273	14.381	Ganab	12.575	14.735	12.251	15.878	17.196	12.865	17.186	15.411	11.892	19.398	10.801	12.383	37.402	28.68	29.855	35.301	30.915	30.935	38.215	28.774	27.091	34.684	31.821	35.487	22.0775	13.222	4.07631	2.7028	4.92935	2.97771	4.5642	24.0237	26.7319	11.4631	10.0592	4.73429	10.5768	8.7098	22.7236
Koike_CLKBMAL1_P3027	AR_G616	3_AR616	TSS	1.51902	30.8678	3.23375	8.80592	19.9441	7.70807	Trpc4ap	8.462	7.807	7.024	8.958	8.194	7.928	8.248	6.516	7.587	7.409	6.498	7.865	19.434	19.104	18.625	19.002	18.088	20.921	20.226	20.797	20.167	19.135	18.529	21.649	1.67743	10.4173	3.60692	9.36426	2.81944	2.23328	2.29078	39.0386	26.7319	16.9341	16.7654	8.94256	21.1535	26.1294	30.2981
Koike_CLKBMAL1_P3028	AR_G617	3_AR617	intron	14.4423	20.6634	5.93808	7.0473	0.352565	7.67479	Ugdh	8.217	8.74	8.577	3.889	6.13	7.83	9.831	6.009	8.814	6.47	10.493	7.097	42.429	60.416	43.915	45.25	41.007	42.018	41.43	65.935	62.707	40.58	47.307	47.186	7.34334	1.10183	8.96788	5.85608	1.84851	2.23328	2.86347	11.4659	19.0942	0	26.8246	4.73429	18.5093	52.2588	60.5962
Koike_CLKBMAL1_P3033	AR_G618	3_AR618	intergenic-10kbless	6.91999	35.9702	6.90011	14.3409	1.76307	5.26048	Cnot8	5.477	6.7	4.67	5.102	6.546	5.508	5.493	6.966	3.87	4.633	3.893	4.268	15.917	15.292	15.087	15.457	13.139	15.594	13.648	13.129	12.711	12.414	13.115	15.779	1.00299	5.50915	13.1183	9.25506	10.4002	5.21099	1.14539	18.0178	26.7319	40.1209	20.1184	8.17742	2.64419	0	7.57453
Koike_CLKBMAL1_P3036	AR_G619	3_AR619	intergenic-10kbless	2.42139	32.5885	2.77384	15.9504	23.74	58.1912	BC114417	73.079	29.897	15.95	2.172	64.996	150.348	92.675	26.379	185.517	2.672	3.165	51.445	165.904	7315.52	2434.07	755.807	2496.28	2555.77	216.938	5136.16	6380.67	434.545	1784.87	1521.79	7.69001	9.91647	11.4137	8.10841	4.42521	8.1887	6.19551	24.0237	16.664	11.4631	20.1184	7.89049	10.5768	8.7098	22.7236
Koike_CLKBMAL1_P3038	AR_G620	3_AR620	intron	10.2822	29.4652	9.78707	8.14	5.4043	16.9799	Wdfy3	16.486	19.297	17.8	18.298	13.616	15.089	20.796	17.702	16.45	18.947	14.98	14.297	3.175	3.443	3.161	3.787	3.313	3.813	3.7	3.676	3.219	3.302	3.988	3.315	20.3264	2.20366	4.07631	8.55888	5.54552	5.39146	1.71808	6.00593	11.4565	20.0604	43.59	6.31239	2.64419	0	7.57453
Koike_CLKBMAL1_P3040	AR_G621	3_AR621	intergenic-10kbless	11.3334	24.6739	5.87617	8.16819	0.125708	158.073	Mlxipl	128.029	214.712	96.614	135.935	158.208	193.963	165.957	195.686	128.527	198.728	134.984	145.529	27.142	37.779	32.683	40.497	32.577	34.062	26.4	37.838	27.736	38.314	44.309	28.347	14.431	6.61098	5.70683	6.75701	6.46043	3.72214	1.14539	17.1078	14.8125	20.0604	20.1184	14.0116	18.5093	40.1178	39.7089
Koike_CLKBMAL1_P3046	AR_G622	3_AR622	intron	8.05636	38.0799	6.50584	9.03981	12.3876	5.30978	Cpsf4	4.188	6.166	5.16	6.858	6.724	5.362	4.468	5.565	3.717	6.508	4.602	4.398	4.596	6.05	7.782	8.026	5.261	5.282	5.936	4.424	3.32	8.066	4.027	7.367	14.2842	5.50915	6.5221	5.00974	5.54552	3.72214	1.14539	18.0178	11.4565	34.3893	30.1777	3.1562	23.7977	43.549	30.2981
Koike_CLKBMAL1_P3049	AR_G623	3_AR623	TTS	1.093	47.8793	2.60844	11.0556	5.91566	94.9121	Apoe	84.605	99.569	121.978	98.896	85.564	73.689	129.167	112.229	92.771	124.317	38.336	77.825	6668.17	8769.87	8263.47	7570.8	8842.14	7976.9	6664.31	9338.53	9263.98	7800.18	8150.62	7763.69	10.891	26.4439	13.6124	13.0499	10.4562	5.95542	2.86347	45.0445	34.3696	22.9262	36.8838	15.781	26.4419	17.4196	15.1491
Koike_CLKBMAL1_P3061	AR_G624	3_AR624	intergenic-10kbless	8.3358	35.3439	7.39443	11.4042	7.31985	3.67328	Slc6a9	3.627	6.176	5.486	2.975	2.263	1.85	3.514	2.701	4.274	5.2	3.978	2.036	5.26	6.579	8.563	8.862	7.833	6.025	6.902	8.466	10.814	6.519	6.53	7.447	11.0417	3.60599	7.33736	11.4937	5.13474	6.69985	2.29078	12.0119	19.0942	25.792	26.8246	7.89049	2.64419	0	2.52484
Koike_CLKBMAL1_P3062	AR_G625	3_AR625	intergenic-10kbless	1.08338	31.6765	5.41824	9.30077	3.18055	5.17581	Rfx5	4.337	7.517	5.56	3.6	5.068	4.702	5.308	7.54	4.382	4.979	3.184	5.933	1.674	2.816	1.172	1.908	1.712	2.706	1.71	2.811	1.541	1.744	2.469	2.203	0.486907	4.40732	8.96788	8.01286	4.31318	1.15048	2.86347	30.0297	15.2754	8.59733	13.4123	6.31239	15.8651	8.7098	30.2981
Koike_CLKBMAL1_P3065	AR_G626	3_AR626	intergenic-10kbless	9.02635	32.957	8.69631	9.98359	6.75968	33.3331	Slc12a7	27.699	38.543	40.79	36.406	25.178	35.397	41.883	28.809	29.806	42.393	25.055	28.038	8.55	14.257	10.647	11.385	12.269	9.571	9.143	14.594	12.116	10.554	10.387	9.841	9.25733	1.10183	5.80565	14.5105	6.38575	3.72214	3.50558	15.0148	11.4565	27.7893	30.1777	3.1562	23.7977	17.4196	0
Koike_CLKBMAL1_P3068	AR_G627	3_AR627	intergenic-10kbless	9.16618	21.6072	7.54321	7.62982	23.74	58.1912	BC114417	73.079	29.897	15.95	2.172	64.996	150.348	92.675	26.379	185.517	2.672	3.165	51.445	165.904	7315.52	2434.07	755.807	2496.28	2555.77	216.938	5136.16	6380.67	434.545	1784.87	1521.79	7.69001	3.30549	4.07631	8.10841	5.93762	3.40632	3.43616	6.00593	19.0942	14.3289	23.4715	3.44312	5.28838	0	28.6914
Koike_CLKBMAL1_P3088	AR_G628	3_AR628	TSS	3.65988	22.591	2.81494	8.24025	2.82937	8.15176	Hnrnpa1	8.675	7.125	8.297	6.839	8.646	8.214	9.381	9.755	8.848	8.599	5.466	7.977	6.896	7.705	7.287	6.783	5.791	6.438	7.62	6.504	6.334	5.563	7.223	7.638	2.80519	11.2854	12.6489	6.44305	3.24889	4.73726	4.11298	12.3759	18.8628	21.2762	13.2091	8.55999	10.5768	28.2409	7.57453
Koike_CLKBMAL1_P3089	AR_G629	3_AR629	intron	3.43545	38.4536	4.93404	10.6884	21.1631	6.72401	Ehhadh	4.488	4.365	7.606	3.868	4.531	13.848	5.623	5.583	10.959	3.77	5.268	10.78	42.524	191.859	120.823	80.307	106.082	96.394	48.947	185.397	175.858	67.017	93.266	66.294	8.47683	5.50915	15.4406	8.69539	4.51857	4.46656	4.00886	24.0237	38.1884	22.9262	3.35307	15.781	10.5768	0	7.57453
Koike_CLKBMAL1_P3094	AR_G630	3_AR630	intron	5.38004	25.7447	5.01573	8.47478	4.38375	15.2307	Mbnl1	18.272	13.7	15.259	9.406	11.02	12.608	16.427	15.169	26.549	12.491	17.139	14.728	10.482	10.999	11.302	11.671	10.938	10.317	11.034	11.009	11.853	10.692	11.634	9.869	11.4298	7.07842	13.0442	9.91028	5.54552	2.16561	3.08908	18.0178	19.0942	22.9262	10.0592	11.6205	10.5768	23.4901	22.7236
Koike_CLKBMAL1_P3095	AR_G631	3_AR631	exon	1.23774	1.84427	2.15809	8.08437	20.0445	10.923	Pcsk9	7.457	7.153	9.368	4.794	15.112	22.531	14.81	8.724	11.176	13.45	4.548	11.953	6.011	14.055	8.226	8.565	7.361	10.664	9.4	14.669	8.893	12.348	11.884	12.998	5.02544	41.3019	24.6555	15.5343	5.76958	3.65446	1.71808	12.0119	33.4438	14.3289	12.9043	5.49943	13.2209	25.8654	22.035
Koike_CLKBMAL1_P3097	AR_G632	3_AR632	intron	1.41354	25.3572	2.26632	11.7531	4.13897	7.55295	Gpbp1	6.8	6.822	7.863	5.67	4.349	8.353	8.978	7.418	13.345	6.598	5.435	9.003	11.526	11.555	11.876	11.889	11.413	11.237	11.38	9.584	11.06	9.941	10.745	9.456	9.84237	6.61098	13.0442	4.95514	3.69701	5.21099	5.72694	27.0267	42.0073	2.86578	6.70615	6.31239	13.2209	34.8392	15.1491
Koike_CLKBMAL1_P3103	AR_G633	3_AR633	intron	4.17611	19.4267	8.19045	9.58104	6.78634	7.52337	Zfp36l2	6.697	9.108	9.089	6.606	5.773	5.723	8.821	7.534	9.967	7.268	9.159	4.534	7.276	14.768	8.949	9.063	11.524	9.733	6.971	12.252	13.453	9.329	14.02	9.274	11.362	4.70782	6.64562	8.01286	5.54552	3.72214	2.86347	18.9278	11.4565	25.792	3.35307	1.5781	7.93257	26.1294	45.4472
Koike_CLKBMAL1_P3106	AR_G634	3_AR634	intron	5.62942	21.522	2.91231	10.9747	22.6415	8.36987	Clint1	8.695	7.055	8.786	6.45	8.262	10.53	10.147	8.088	8.26	7.285	5.605	11.277	8.501	6.971	5.945	7.219	6.991	8.632	7.463	6.74	6.825	7.164	7.011	7.723	22.9253	7.71281	10.3267	5.46021	2.46467	2.23328	4.06092	21.0208	0	22.9262	10.0592	1.5781	6.81079	26.1294	30.2981
Koike_CLKBMAL1_P3124	AR_G635	3_AR635	intron	7.54692	31.8448	2.38635	12.5744	15.3858	67.0505	Adk	52.174	52.412	58.331	67.197	39.29	91.569	65.844	53.564	94.343	73.996	77.412	78.474	82.137	98.804	103.071	107.656	110.643	110.001	77.947	99.992	98.129	93.257	96.362	90.838	14.5712	11.0183	4.89157	7.99921	4.31318	5.57193	3.48823	24.0237	11.4565	12.071	30.1777	7.89049	7.93257	34.8392	15.1491
Koike_CLKBMAL1_P3132	AR_G636	3_AR636	intron	17.9992	18.5909	10.0415	6.66307	20.196	44.2113	Lifr	63.18	45.394	21.798	28.433	50.633	24.99	30.809	70.767	32.466	39.068	90.293	32.705	71.112	15.177	36.659	25.526	19.335	26.342	75.544	16.198	13.836	41.161	36.828	29.792	0.631852	5.6427	9.73373	9.24141	7.39402	4.78238	4.14769	18.5638	19.5571	13.721	40.3385	24.1497	33.3328	17.4196	60.5962
Koike_CLKBMAL1_P3135	AR_G637	3_AR637	intron	9.14595	31.6349	6.58329	11.7282	9.65484	15.8843	Cyp4v3	11.095	16.713	15.644	27.317	11.738	13.041	14.729	15.06	18.98	16.59	10.633	19.072	160.204	129.071	158.01	151.221	143.529	167.329	162.792	123.053	146.519	166.18	143.12	127.083	17.4431	9.91647	5.70683	11.2617	10.4749	2.97771	2.86347	9.0089	19.0942	31.263	33.5307	6.31239	13.2209	34.8392	30.2981
Koike_CLKBMAL1_P3141	AR_G638	3_AR638	intron	5.17895	24.3092	4.22901	9.18459	3.05024	7.16099	Cherp	6.811	8.12	6.071	7.267	8.315	7.454	8.166	7.534	5.902	8.728	5.926	5.638	4.173	3.777	4.152	3.76	4.066	3.488	3.947	3.759	3.562	4.001	4.059	4.268	20.5928	6.21031	12.6736	5.85608	3.60365	3.72214	3.43616	27.0267	25.3432	14.3289	16.7654	6.98189	1.68267	45.9243	22.7236
Koike_CLKBMAL1_P3145	AR_G639	3_AR639	TSS	3.17474	44.025	1.46286	9.79214	4.79322	5.34109	Neurl2	3.61	6.077	7.726	4.314	3.597	5.433	7.734	5.588	5.949	5.348	3.804	4.913	1.77	2.136	1.651	2.236	1.335	2.441	2.305	2.57	2.093	1.1	1.598	1.938	3.79302	14.3238	7.88087	5.85608	0.616169	2.97771	2.29078	32.1227	34.3696	9.81311	26.8246	7.89049	15.8651	32.4638	15.1491
Koike_CLKBMAL1_P3153	AR_G640	3_AR640	intron	8.6843	42.0644	2.19308	9.64035	19.7289	14.3836	Onecut1	51.563	3.112	2.264	3.433	10.262	2.746	10.246	5.939	18.809	3.473	57.133	3.625	14.723	1.063	12.085	2.4	5.772	2.084	18.653	3.717	8.026	3.599	5.316	3.552	3.50714	13.222	10.2278	2.71646	4.31318	2.23328	3.1932	27.0267	15.2754	39.1656	43.59	4.44737	10.5768	0	7.57453
Koike_CLKBMAL1_P3159	AR_G641	3_AR641	intron	7.09981	70.4958	5.50173	13.9373	14.3703	14.1752	Il6st	10.905	11.448	12.357	15.364	16.442	11.111	12.218	14.044	14.114	14.304	25.414	12.38	21.409	14.665	17.217	19.255	18.669	17.968	21.854	16.95	16.123	20.767	18.961	17.875	20.7588	11.0183	17.9358	15.9575	6.77785	12.2041	2.53374	49.0485	38.1884	60.1813	57.0023	11.0467	21.1535	17.4196	45.4472
Koike_CLKBMAL1_P3161	AR_G642	3_AR642	intron	11.7108	19.0027	2.73784	8.22075	15.7436	9.40092	B4galt1	11.081	8.806	7.046	6.633	12.681	6.512	8.601	7.529	9.8	11.666	14.19	8.267	15.657	8.037	15.19	11.572	14.245	11.399	15.649	13.274	14.121	9.393	10.993	13.986	1.99948	13.222	4.0269	8.29952	3.47295	5.95542	2.86347	2.82097	22.913	11.4631	26.8246	10.1381	10.096	8.70978	0
Koike_CLKBMAL1_P3174	AR_G643	3_AR643	intron	7.89977	29.2326	6.6905	11.7022	14.673	5.17603	Fndc3b	5.662	3.415	3.835	8.305	9.433	2.545	3.988	4.669	2.809	6.108	7.025	4.319	4.453	1.431	1.695	3.456	1.652	1.889	5.911	1.405	1.847	3.187	2.141	4.239	23.7281	6.61098	12.2289	8.10841	9.24253	7.35404	2.86347	33.0326	22.913	14.1552	30.1777	11.0467	10.5768	17.4196	7.57453
Koike_CLKBMAL1_P3176	AR_G644	3_AR644	TSS	5.54207	36.7852	5.59358	5.69072	8.55785	10.7891	Egln2	8.703	13.568	12.75	12.294	12.219	10.506	12.058	9.961	8.374	12.599	8.197	8.241	15.429	13.705	15.262	14.426	14.359	15.309	15.232	17.492	14.158	15.27	14.945	16.147	1.83862	7.84636	11.1666	14.3058	5.4895	6.49682	2.46432	37.1276	40.6186	31.5235	48.772	9.46859	15.9453	36.4228	13.3128
Koike_CLKBMAL1_P3177	AR_G645	3_AR645	intron	5.95205	26.3074	3.80431	10.5956	6.7689	20.0539	8430408G22Rik	7.956	15.91	40.06	23.863	11.776	16.515	21.254	28.114	39.149	11.019	3.976	21.057	10.705	47.61	15.493	5.555	12.421	5.68	10.738	20.886	15.776	14.537	26.424	15.282	6.82208	10.1168	15.49	6.75701	5.11607	5.21099	1.14539	19.3828	15.2754	25.792	10.0592	6.31239	7.93257	8.7098	7.57453
Koike_CLKBMAL1_P3182	AR_G646	3_AR646	intergenic-10kbless	4.55911	30.7045	5.26996	7.98701	2.33868	65.158	Srebf1	72.411	90.898	52.105	37.977	65.839	81.695	111.295	54.116	107.356	46.545	13.224	48.436	26.484	103.202	80.753	83.335	49.466	52.478	32.441	83.755	77.398	66.066	34.447	71.152	9.68404	9.8163	9.41257	7.68525	4.83599	3.72214	2.22136	24.9337	22.2187	30.9156	6.70615	4.73429	10.5768	43.549	15.1491
Koike_CLKBMAL1_P3185	AR_G647	3_AR647	intron	9.43291	34.6943	7.37067	8.50632	1.20149	45.4397	0610008F07Rik	29.432	50.76	57.011	54.275	30.919	77.139	42.54	47.565	43.886	26.391	40.364	44.997	5.31	4.573	2.659	3.914	4.061	3.232	3.552	4.157	2.373	3.648	4.251	2.73	1.15601	5.50915	4.07631	13.2683	4.92935	5.05308	1.14539	12.0119	11.4565	31.5235	23.4715	9.32513	15.8651	8.7098	22.7236
Koike_CLKBMAL1_P3186	AR_G648	3_AR648	intergenic-10kbless	16.4492	31.0903	6.91026	9.65542	10.8436	6.42434	Lmbr1l	3.447	6.834	6.326	9.818	4.998	5.421	5.047	8.26	4.171	11.304	5.888	5.579	2.915	2.217	2.438	2.832	2.146	1.504	2.689	1.945	2.122	2.891	2.602	2.79	15.7969	5.50915	12.6983	10.5928	7.39402	4.46656	2.29078	27.0267	7.63768	11.4631	30.1777	15.781	18.8298	52.2588	15.1491
Koike_CLKBMAL1_P3192	AR_G649	3_AR649	intron	8.49123	16.2012	8.68296	7.39043	8.11955	6.15162	4931406C07Rik	4.169	6.992	10.714	4.8	5.738	7.261	5.335	3.636	10.636	6.696	3.308	4.535	66.895	95.328	93.165	84.04	100.462	87.941	58.048	99.572	129.235	73.42	80.861	59.145	10.6312	1.10183	7.18913	13.7461	8.30894	4.46656	2.86347	24.0237	3.81884	25.792	10.0592	4.54301	10.5768	0	15.1491
Koike_CLKBMAL1_P3197	AR_G650	3_AR650	intron	9.69393	31.4671	8.73398	10.4946	6.44767	12.6117	Trpm7	9.087	12.368	12.443	10.269	7.936	12.348	13.41	12.753	21.846	12.783	11.444	14.653	6.655	7.45	7.968	6.851	7.254	7.022	6.475	7.427	6.574	6.207	7.406	6.837	8.77807	2.20366	7.33736	8.10841	6.77785	5.95542	2.86347	6.00593	11.4565	31.5235	23.4715	12.6248	10.5768	8.70978	7.57453
Koike_CLKBMAL1_P3199	AR_G651	3_AR651	intron	7.26738	39.4873	8.5107	6.9994	7.26368	11.8832	Akap9	9.762	12.878	11.463	12.621	9.786	10.081	13.23	12.537	15.196	12.597	11.426	11.021	3.344	2.852	2.884	2.959	3.009	2.899	3.058	3.045	2.895	2.729	2.899	2.976	1.53444	1.10183	4.07631	8.55888	5.54552	2.97771	0	15.0148	30.5507	11.4631	40.2369	7.89049	13.2209	26.1294	22.7236
Koike_CLKBMAL1_P3202	AR_G652	3_AR652	intron	6.71646	31.5845	3.76697	8.91164	23.2773	8.94175	Ttyh2	10.855	11.094	8.147	9.143	10.662	10.496	9.989	9.19	4.548	9.829	5.36	7.986	12.86	12.671	11.777	12.325	12.371	15.452	12.225	13.2	11.739	13.504	11.909	15.382	22.4534	12.7545	8.96788	5.55577	3.08084	1.48885	1.56189	16.2888	22.3344	34.3893	17.1718	4.73429	18.5093	17.4196	7.57453
Koike_CLKBMAL1_P3204	AR_G653	3_AR653	intergenic-10kbless	16.0792	24.1212	9.22312	6.28571	20.8176	37.6413	Dusp1	36.414	30.691	16.918	41.727	16.553	65.223	42.688	20.391	43.871	27.594	21.483	88.143	6.613	6.286	19.725	12.447	37.889	21.286	24.486	19.319	23.281	19.987	43.599	15.572	17.5394	3.30549	4.07631	6.75701	3.69701	4.21842	1.71808	9.0089	0	22.9262	13.4123	17.3591	18.5093	63.3439	7.57453
Koike_CLKBMAL1_P3213	AR_G654	3_AR654	intron	2.20994	23.7544	5.49749	7.85827	0.230765	72.3895	Serpinc1	65.956	74.703	60.908	56.188	64.466	106.529	93.237	93.232	68.809	65.08	36.324	83.242	539.447	578.019	510.658	559.206	608.348	615.589	520.995	582.018	522.885	553.483	618.708	546.6	19.5194	1.10183	15.49	6.74336	3.08084	4.46656	3.7659	27.0267	22.913	8.59733	3.35307	9.46859	7.93257	17.4196	7.57453
Koike_CLKBMAL1_P0020	NE_G001	4_NE001	TTS	5.67721	163.567	4.03163	79.0481	NA	0.598583	AK019124	0.1342	0.6151	1.6196	0.2219	0.4277	0.6737	0.3741	0.7457	0.1387	0.9101	1.082	0.2402	0	0	0	0	0	0	0	0	0	0	0	0	NA	74.9244	91.3093	57.7554	34.5054	18.1595	9.1631	126.125	163.516	174.378	113.801	25.2496	47.5954	104.517	113.618
Koike_CLKBMAL1_P0032	NE_G002	4_NE002	intron	5.3165	138.919	3.39411	72.8651	NA	0.591267	AK027991	0.3998	0.1749	0.4396	0.9466	1.9893	0.4943	0.1589	0.3473	0.2419	0.2517	1.1613	0.4896	0	0	0	0	0	0	0	0	0	0	0	0	NA	75.8927	91.3093	42.0163	16.0391	13.8057	6.29963	87.0861	104.613	100.302	67.0615	28.4058	29.0861	409.36	318.13
Koike_CLKBMAL1_P0043	NE_G003	4_NE003	intron	5.41383	170.121	4.0743	77.2045	NA	0.350367	Adc	0.096	0.4462	0.7057	0.4247	0.2648	0.3022	0.3112	0.5675	0.205	0.333	0.3059	0.2422	0.1364	0.1209	0.0947	0.1345	0	0.0119	0.1868	0.0715	0.2212	0.195	0	0	NA	69.7492	90.2223	52.3771	20.7443	4.46656	4.75509	111.565	141.297	180.544	64.0132	9.46859	21.1535	78.3881	98.4688
Koike_CLKBMAL1_P0045	NE_G004	4_NE004	intron	7.51354	114.727	4.54618	74.6417	NA	0.3281	Slc2a5	0.106	0.7122	0.9184	0.5057	0.0868	0.22	0.1108	0.3056	0.4524	0.2122	0.1618	0.1453	1.0567	1.653	0.4766	0.6186	1.3205	2.0237	1.9023	0.7565	1.7195	0.9295	1.3021	3.2479	NA	53.9896	77.3264	49.0327	27.5595	13.3997	3.43616	56.9654	72.558	109.768	97.2391	6.59932	10.5768	17.4196	30.9867
Koike_CLKBMAL1_P0046	NE_G005	4_NE005	intergenic-10kbless	7.43328	150.857	4.07778	62.6658	NA	0.8131	Igsf8	0.8441	0.8907	1.0354	0.4995	1.0057	0.7733	0.6598	0.9151	0.3722	1.7961	0.5116	0.4537	1.4557	1.4215	1.1	1.1486	1.4156	1.4339	1.9363	1.8671	1.3901	1.255	1.8572	1.7072	NA	66.8777	46.9146	45.6883	38.4639	41.1465	8.50364	75.0742	113.524	97.4364	127.417	27.7363	42.307	43.5489	30.2981
Koike_CLKBMAL1_P0068	NE_G006	4_NE006	intron	4.03939	86.2682	3.632	54.2718	NA	0.0117083	Aqp12	0	0.1405	0	0	0	0	0	0	0	0	0	0	0	0	0	0	0	0	0	0	0	0	0	0	NA	75.9595	74.1888	48.9098	26.6446	11.9334	6.35169	117.116	106.928	102.473	72.6499	23.4324	26.4419	191.615	128.767
Koike_CLKBMAL1_P0088	NE_G007	4_NE007	intron	6.63449	53.7248	4.20858	51.4934	NA	0.264575	Smyd1	0.3289	0.3581	0.3586	0.2352	0.1238	0.2198	0.3054	0.1756	0.2511	0.1329	0.4097	0.2758	0.806	0.8217	0.8347	0.5344	3.2869	4.9755	0.6574	0.9477	1.2686	0.9235	2.5759	3.7721	NA	41.2017	83.4532	45.1969	9.8587	5.95542	2.86347	18.0178	61.1015	77.2023	40.4401	6.40804	15.8651	95.8077	79.1882
Koike_CLKBMAL1_P0089	NE_G008	4_NE008	intron	6.31577	104.288	3.99792	72.7371	NA	0.00663333	Rtp1	0	0	0.0259	0	0	0	0	0	0	0	0.0537	0	0	0	0	0	0	0	0	0	0	0	0	0	NA	62.8043	66.8515	39.6411	27.2234	19.8288	5.15424	60.0593	68.7391	94.5706	63.7084	29.9839	42.307	148.066	126.013
Koike_CLKBMAL1_P0102	NE_G009	4_NE009	TSS	2.75327	132.426	3.19932	79.1926	NA	0.772883	AK008560	0.1601	0.576	2.1618	0.4999	0.8668	0.6536	0.2834	0.4731	1.0638	1.8443	0.2776	0.4142	0	0.0691	0	0	2.3353	3.0455	0	0	0	0	2.4227	2.9713	NA	76.0262	55.5366	39.6411	28.8105	14.1441	10.6903	123.122	99.2899	68.7786	40.2369	22.6194	42.307	60.9686	75.7452
Koike_CLKBMAL1_P0107	NE_G010	4_NE010	intron	3.79271	74.2866	2.62282	68.8969	NA	0.161342	Sgip1	0.1373	0.1247	0.1759	0.2499	0.1893	0.1569	0.1464	0.2292	0.0724	0.0817	0.1345	0.2379	0.0019	0.0114	0.0194	0.0388	7.1678	8.4141	0.0274	0.0268	0.0166	0.0192	8.2424	7.901	NA	91.4519	68.902	34.2355	7.31934	5.95542	3.43616	54.0534	84.0145	40.1209	20.1184	4.73429	15.8651	34.8392	37.8726
Koike_CLKBMAL1_P0115	NE_G011	4_NE011	TSS	3.50799	67.9875	3.62771	51.7262	NA	0.770325	Sertad1	0.6405	0.8993	1.9158	0.4641	0.4389	1.1268	0.5117	0.6361	0.7247	0.6395	0.8458	0.4007	2.0164	1.9685	2.128	2.2005	1.3793	2.9381	3.271	1.8774	1.9721	2.813	1.8776	1.7343	NA	57.2951	46.1982	37.3342	18.4851	10.422	6.87233	54.0534	61.1015	31.3499	46.943	12.6248	23.7977	113.227	83.3197
Koike_CLKBMAL1_P0120	NE_G012	4_NE012	intron	4.81835	117.055	3.42603	64.0376	NA	0.319008	AK034421	0.1388	0.6615	0.2141	0.3641	0.0187	0.2051	0.3023	0.506	0.5693	0.1189	0.6662	0.0631	0.0769	0.2022	0.2707	0	0.9997	0.8649	0	0	0.1555	0.0697	0.8965	1.2535	NA	63.9395	62.9234	31.5464	16.0204	6.69985	3.43616	77.7132	68.7391	63.0471	63.7084	9.18166	34.3745	34.8391	15.1491
Koike_CLKBMAL1_P0132	NE_G013	4_NE013	intron	6.02264	102.836	4.20299	48.6856	NA	0.833533	Taf1c	1.0374	0.5019	0.7251	1.3174	1.0621	1.1013	0.6997	0.558	0.396	1.0218	0.7627	0.819	0.3005	0.5197	0.4082	0.5492	0	0.0524	0.4211	0.6249	0.3819	0.4425	0.154	0.0517	NA	46.978	45.1606	30.7273	18.4851	8.1887	2.49903	68.7043	76.3768	111.765	43.59	23.6715	32.2912	60.9685	45.4472
Koike_CLKBMAL1_P0139	NE_G014	4_NE014	intron	8.13207	103.627	4.79621	46.8292	NA	0.0937583	Slc45a1	0.0482	0.0194	0.047	0.3071	0.1011	0.0535	0.1752	0.0441	0	0.1963	0.0487	0.0845	0	0	0.0109	0.0308	7.4526	7.1459	0	0	0	0.0306	5.4083	4.949	NA	38.9647	41.5784	35.1365	18.9705	7.12846	3.92208	39.0386	64.1102	94.5706	93.8861	12.7204	12.4998	17.4196	22.7236
Koike_CLKBMAL1_P0140	NE_G015	4_NE015	TTS	4.60901	81.0203	7.12479	54.9665	NA	0.00934167	Matn4	0	0	0	0.0692	0	0	0	0	0.0429	0	0	0	0	0	0	0	1.1403	1.3996	0	0	0	0	2.9407	0.9982	NA	36.327	32.7093	36.8837	35.1216	18.9039	7.44502	51.0504	76.2611	48.7182	51.109	9.46859	44.8711	43.549	23.8712
Koike_CLKBMAL1_P0165	NE_G016	4_NE016	3' UTR	2.27042	103.845	4.89347	45.8843	NA	0.204267	Il17rd	0.08	0.5104	0.4972	0.3617	0.0185	0.1442	0.1309	0.3568	0.1223	0.0517	0.1147	0.0628	0.111	0.0539	0.076	0.1786	2.0658	3.6383	0.0735	0.1144	0.0624	0.0671	1.9125	4.3592	NA	38.564	37.255	28.2975	28.9599	17.1218	9.71844	90.089	64.9203	65.9129	40.2369	29.9839	44.9512	165.486	83.3198
Koike_CLKBMAL1_P0176	NE_G017	4_NE017	TTS	4.56084	48.8983	3.02938	31.4137	NA	0.00540833	Elavl3	0	0	0	0	0.0424	0.0225	0	0	0	0	0	0	0	0	0	0	0.0903	0.5523	0	0	0	0	0.4992	0.3079	NA	43.4722	44.8394	19.4384	10.6803	6.13589	3.43616	48.1385	62.7216	40.1209	40.2369	13.5334	25.8009	35.367	37.8726
Koike_CLKBMAL1_P0183	NE_G018	4_NE018	exon	5.77098	74.9205	3.28042	39.0785	NA	0.0913417	Celsr2	0.0799	0.0609	0.0647	0.0605	0.1229	0.0624	0.0603	0.0613	0.0612	0.2116	0.1652	0.0852	0.0425	0.0644	0.0352	0.0583	0	0.0097	0.0271	0.0229	0.0296	0.0638	0	0	NA	42.6709	30.0412	23.0694	15.3295	11.9108	4.54684	36.0356	57.2826	51.584	36.8838	23.1454	23.7977	113.227	83.3198
Koike_CLKBMAL1_P0199	NE_G019	4_NE019	intron	3.88896	42.4784	3.29546	29.5926	NA	0.431983	E2f2	0.9242	0.8788	0.6073	0.219	0.2615	0.3047	0.3255	0.4627	0.2641	0.3582	0.1781	0.3997	0.2714	0.3094	0.4752	0.2731	0.1865	0.208	0.3749	0.622	0.3269	0.4592	0.1857	0.4366	NA	48.3469	38.9596	23.8202	16.0204	4.53424	2.63786	45.4085	49.6449	44.2024	23.4715	1.5781	24.6791	69.6783	15.1491
Koike_CLKBMAL1_P0201	NE_G020	4_NE020	TSS	6.1552	79.9245	2.85707	48.7142	NA	0.206733	Rhebl1	0.2033	0.0874	0.1849	0.5461	0	0.0737	0	0.1845	0.3018	0.6812	0.2179	0	0.1147	0.2766	0.1111	0.201	0.3188	0.8608	0.2214	0.041	0.1954	0.0381	0	0.1747	NA	54.7242	37.5268	25.6357	12.342	11.1664	5.15424	45.0445	45.8261	98.4785	36.8838	14.7767	37.9802	60.9685	45.4472
Koike_CLKBMAL1_P0248	NE_G021	4_NE021	TSS	5.05919	61.1652	3.61763	38.9172	NA	0.679375	3110009E18Rik	0.5425	0.8534	0.6057	0.8737	1.0075	0.909	0.5561	0.8957	0.095	0.8201	0.6128	0.381	0.0263	0.1971	0.1711	0.0768	5.5732	5.0597	0.0617	0.1486	0.3751	0.1085	4.7568	4.3018	NA	37.9964	39.1326	18.046	12.3234	7.44427	1.14539	51.0504	74.0624	37.2551	52.0235	18.8415	14.5831	45.3965	22.7236
Koike_CLKBMAL1_P0251	NE_G022	4_NE022	intron	4.5651	80.7728	5.77255	37.6937	NA	0.95165	Gins2	0.8187	1.5885	1.0381	1.3168	1.1224	2.5868	0.2919	0.291	0.8852	0.6716	0.1608	0.648	0.3893	0.5037	0.4223	0.1018	0.39	0.0688	0.8241	0.5703	0.3057	0.2029	0.2506	0.0712	NA	24.1401	26.5331	28.3795	19.0079	6.69985	5.72694	46.9555	57.2826	57.3155	26.8246	20.5153	29.0861	25.6015	22.7236
Koike_CLKBMAL1_P0253	NE_G023	4_NE023	TSS	8.49451	85.9054	5.63446	34.8376	NA	0.885767	AK045688	0.3128	0.2327	1.4355	1.3638	0.1558	0.8251	0.1363	0.3634	2.1684	2.0902	0.6008	0.9444	0.104	0.2681	0	0	6.094	10.6495	0.5311	0.0812	0	0	6.5443	9.8554	NA	26.4439	36.2915	32.734	18.8025	8.1887	3.43616	25.2067	49.5292	96.1338	77.0191	16.833	26.4419	87.0979	68.1708
Koike_CLKBMAL1_P0257	NE_G024	4_NE024	TSS	8.85493	39.8836	5.47709	32.4042	NA	0.0105167	AK154635	0	0	0.0965	0	0	0	0	0	0.0297	0	0	0	0	0	0	0.0633	17.1469	9.2336	0.0245	0	0	0	15.7522	9.2086	NA	23.1384	27.0272	25.5265	19.68	3.3612	2.29078	15.0148	19.0942	37.2551	46.943	6.36021	2.64419	0	15.1491
Koike_CLKBMAL1_P0292	NE_G025	4_NE025	intron	6.461	81.4673	6.45925	45.873	NA	0.0195667	Prkg2	0	0.0438	0.109	0	0	0.0426	0	0	0.0394	0	0	0	0	0.0682	0.007	0	0.3851	0.357	0.0011	0	0.0474	0	0.4789	0.7508	NA	18.7311	37.502	33.8124	22.7982	11.1664	2.70728	48.0475	45.8261	60.1813	50.3977	11.0467	26.4419	0	37.8726
Koike_CLKBMAL1_P0305	NE_G026	4_NE026	intergenic-10kbless	5.76782	64.3017	4.53839	21.8914	NA	0.218083	Hmga1	0.0226	0.0235	0.4338	0.3792	0.208	0.1521	0.1997	0.3373	0.1914	0.3738	0.187	0.1086	4.1098	3.284	5.0701	2.8357	4.0866	2.8803	4.6225	4.071	3.1736	2.5877	2.1598	2.1693	NA	24.2403	35.0563	18.6876	17.8689	6.69985	1.71808	51.0504	53.4638	77.376	36.8838	12.6248	13.2209	60.9686	36.2659
Koike_CLKBMAL1_P0308	NE_G027	4_NE027	intergenic-10kbless	3.63655	46.7773	2.20328	44.974	NA	0.0912667	Jsrp1	0.2623	0	0	0.1233	0.1209	0.3174	0	0.1139	0	0	0.1574	0	0	0	0	0	0.3619	0.1916	0	0	0	0.079	0.2093	0.1586	NA	60.7008	44.9382	14.2921	5.63888	2.97771	3.83531	60.0593	45.4789	25.792	30.1777	12.6248	10.5768	139.357	83.3198
Koike_CLKBMAL1_P0309	NE_G028	4_NE028	TSS	4.72967	91.2239	3.77747	32.4683	NA	0.7198	Dusp7	0.7321	0.5906	0.8943	0.7099	0.6881	0.9996	0.6485	0.6123	0.3821	0.8734	1.0188	0.4879	1.2566	1.2375	1.2407	1.2138	2.6079	1.0549	1.0814	1.0988	1.5133	1.1226	0.8824	1.72	NA	36.3604	36.3903	25.4719	12.3794	5.77495	5.72694	60.0593	76.3768	63.0471	58.3232	6.31239	37.9802	52.2587	60.5962
Koike_CLKBMAL1_P0329	NE_G029	4_NE029	exon	2.67095	41.3577	3.14966	30.9114	NA	0.418808	Nol3	0.5603	0.2661	0.4413	0.2858	0.5287	0.4447	0.6306	0.1585	0.2605	0.5837	0.5518	0.3137	0.6947	0.3935	0.3204	0.1884	0.2702	0.0358	0.1809	0.3101	0.2268	0.4064	0.0651	0.074	NA	35.0916	28.5342	17.4181	8.62636	7.44427	2.86347	39.0386	22.913	27.2683	13.4123	9.46859	15.8651	69.6783	30.2981
Koike_CLKBMAL1_P0330	NE_G030	4_NE030	TSS	6.90166	90.1447	6.82549	36.4358	NA	0.58275	Txndc16	0.4789	0.4654	0.8625	0.7443	0.4998	0.4565	0.4013	0.7205	0.6148	0.6594	0.3855	0.7041	0.4326	0.8056	0.3506	0.4355	6.6722	4.2098	0.4928	0.3723	0.6726	0.4475	4.0722	4.9448	NA	27.5791	27.2742	22.6599	23.4144	10.2415	1.71808	45.4995	54.0424	84.8443	50.2961	18.9372	29.0861	50.6751	30.2981
Koike_CLKBMAL1_P0342	NE_G031	4_NE031	intron	4.93028	58.3556	3.6381	35.8194	NA	0.503608	AK006572	1.2474	0.298	0.1734	0.3762	2.3881	0.1796	0.2968	0.2071	0.1726	0.337	0	0.3671	0.2265	0	0	0	0	0	0	0	0	0	0	0	NA	42.6375	26.9036	23.8748	14.788	8.1887	4.14769	48.0475	42.0073	46.3735	43.59	17.3591	18.5093	34.8392	22.7236
Koike_CLKBMAL1_P0350	NE_G032	4_NE032	intron	8.0929	92.0981	5.70527	36.3101	NA	0.02425	Rgs8	0	0	0.0757	0	0	0	0	0	0.2153	0	0	0	0	0	0	0	1.7959	2.1818	0	0	0	0	1.716	1.0742	NA	20.9348	35.328	27.028	19.3813	11.1664	1.85692	44.2255	43.6274	108.292	56.3926	18.9372	42.307	60.9686	64.9573
Koike_CLKBMAL1_P0356	NE_G033	4_NE033	intron	6.95747	56.7946	4.36501	31.8426	NA	0.0382667	Crispld2	0.0531	0.0802	0	0.0443	0.0529	0.0235	0	0	0.0269	0.0266	0.0937	0.058	0.1735	0.031	0.0311	0.0642	0	0	0.1962	0.0195	0.1447	0.0098	0	0	NA	27.5791	31.0788	19.5476	13.5557	5.21099	0.572694	12.0119	49.6449	64.6971	30.1777	6.31239	5.28838	59.9128	30.2981
Koike_CLKBMAL1_P0362	NE_G034	4_NE034	intron	5.78987	58.5534	3.86156	40.4865	NA	0.145942	AK002866	0.1163	0.1114	0	0.2888	0	0.0686	0.1905	0	0.2245	0.2077	0.4226	0.1209	0	0	0.1296	0	7.2774	6.0782	0	0	0.0074	0.0753	6.4575	5.1778	NA	40.2335	34.241	30.8502	13.7798	8.93313	2.49903	39.0386	49.6449	37.2551	50.2961	15.3984	21.1535	0	37.8726
Koike_CLKBMAL1_P0368	NE_G035	4_NE035	intron	6.44189	114.255	6.7377	50.9582	NA	0.969158	Pla2g12a	0.3	1.7523	1.1307	1.1907	0.9605	0.5176	0.862	2.7494	0.1291	1.2184	0.5863	0.2329	5.2001	4.406	5.3544	2.2603	0.4237	0.9606	4.7581	3.5544	4.6903	3.2586	1.1728	0.6547	NA	24.2403	37.502	32.4337	25.2629	20.844	4.85922	68.0673	64.9203	83.1075	70.4146	18.9372	26.2816	139.357	98.4688
Koike_CLKBMAL1_P0383	NE_G036	4_NE036	intron	3.98578	98.8118	4.71373	35.8349	NA	0.264575	Smyd1	0.3289	0.3581	0.3586	0.2352	0.1238	0.2198	0.3054	0.1756	0.2511	0.1329	0.4097	0.2758	0.806	0.8217	0.8347	0.5344	3.2869	4.9755	0.6574	0.9477	1.2686	0.9235	2.5759	3.7721	NA	24.2403	32.981	26.1271	12.3234	7.44427	3.43616	65.9743	99.9842	52.0182	46.943	14.3463	27.4835	52.2587	15.1491
Koike_CLKBMAL1_P0391	NE_G037	4_NE037	intron	0.711709	28.1643	2.88275	47.7448	NA	0.0421167	6330403A02Rik	0.0372	0.0325	0.0516	0	0.1241	0.0196	0	0.0323	0.04	0.0764	0.0714	0.0203	0	0	0.0218	0.0452	0	0	0.021	0	0.075	0.0224	0	0	NA	56.1933	43.2089	28.8299	4.92935	2.97771	2.86347	45.2265	11.4565	2.86578	16.7654	3.1562	5.28838	26.1294	15.1491
Koike_CLKBMAL1_P0392	NE_G038	4_NE038	intron	6.53048	75.089	4.46335	37.2348	NA	0.004875	Nrsn2	0	0	0.0585	0	0	0	0	0	0	0	0	0	0	0	0	0	0	0	0	0	0	0	0	0	NA	26.1768	43.2089	26.1271	12.5101	9.67755	5.81371	49.0485	53.4638	63.0471	53.6492	17.3591	10.5768	148.066	82.8607
Koike_CLKBMAL1_P0401	NE_G039	4_NE039	TSS	4.96905	34.7319	2.37931	40.353	NA	0.927992	Banf1	2.1681	0.3359	1.3088	1.0078	1.0603	0.8518	0.2953	1.0255	0.3569	1.2327	1.0955	0.3973	20.5265	20.4441	18.9838	18.9933	0.1238	0.1704	21.3693	20.5179	19.77	19.1275	0.1909	0.2712	NA	52.8878	33.6481	18.0733	4.31318	3.72214	3.93944	9.0089	34.3696	25.792	10.0592	0	10.5768	17.4196	15.1491
Koike_CLKBMAL1_P0422	NE_G040	4_NE040	intron	4.25787	65.3889	2.69052	29.47	NA	0.606783	Mrpl23	0.1191	0.7618	0.2084	0.9373	0.4448	0.6888	0.3404	1.0503	1.1975	0.5737	0.6466	0.3127	12.7922	10.0942	10.1183	9.8532	0.2002	0.2596	11.1275	10.5727	12.884	11.7125	0	0.2686	NA	37.7961	31.7458	17.2679	3.69701	2.43631	3.7659	48.0475	68.7391	45.8524	20.1184	7.89049	13.2209	0	50.4969
Koike_CLKBMAL1_P0432	NE_G041	4_NE041	intron	6.37752	95.7586	5.50577	39.418	NA	0.0504667	Gphb5	0	0	0	0.2031	0	0	0.0941	0.0939	0	0.1555	0	0.059	0	0	0	0	0	0	0	0	0	0	0	0	NA	30.3504	21.1968	29.021	21.9953	11.4597	4.33859	71.3432	59.9442	71.6444	70.4146	28.4058	41.1853	26.1294	45.4472
Koike_CLKBMAL1_P0433	NE_G042	4_NE042	intron	4.62593	63.8467	4.24074	33.1946	NA	0.02425	Rgs8	0	0	0.0757	0	0	0	0	0	0.2153	0	0	0	0	0	0	0	1.7959	2.1818	0	0	0	0	1.716	1.0742	NA	35.2585	37.3785	23.9157	14.788	13.3997	2.86347	48.9575	76.3768	74.5102	33.5307	7.89049	15.8651	78.3881	83.3198
Koike_CLKBMAL1_P0434	NE_G043	4_NE043	intron	5.55165	56.3928	4.31397	36.3586	NA	0.0507167	Tnfsf15	0	0.277	0.2076	0	0	0.0247	0	0.0458	0.0535	0	0	0	0	0	0.0309	0	0.021	0.0434	0.0597	0.0407	0.0095	0	0.0202	0.023	NA	31.9531	32.8328	23.9976	15.5536	5.95542	2.86347	30.0297	55.5468	48.7182	16.7654	14.2029	5.28838	17.4196	30.2981
Koike_CLKBMAL1_P0459	NE_G044	4_NE044	intron	6.21373	64.3071	6.12426	42.604	NA	0.114167	Fhad1	0	0.0323	0.1043	0.4396	0.1427	0	0.022	0.0393	0.0849	0.3503	0.1264	0.0282	0.2028	0.2765	0.2717	0.0586	0.0533	0.0207	0.068	0.2029	0.2455	0.1911	0.0575	0.0109	NA	26.4439	31.3011	42.3712	21.846	7.44427	4.00886	44.7715	54.0424	47.8498	57.0023	14.2507	18.5093	52.2588	41.5451
Koike_CLKBMAL1_P0484	NE_G045	4_NE045	intron	5.7444	75.6474	3.09988	42.4653	NA	0.329275	AK076929	0	0.6165	0.3261	1.0182	0	0.3484	0.1611	0.2601	0.4999	0	0	0.721	0	0	0	0	10.3251	13.3131	0	0	0	0	4.3779	8.6585	NA	44.2735	35.2292	25.3081	10.4749	9.67755	3.43616	46.8645	38.1884	51.584	50.2961	14.2029	33.0123	60.9686	83.3198
Koike_CLKBMAL1_P0488	NE_G046	4_NE046	intergenic-10kbless	5.99303	125.928	6.02119	30.8039	NA	0.002725	Padi1	0	0	0	0	0	0	0	0.0327	0	0	0	0	0.0156	0	0	0	3.7964	4.3298	0	0	0	0	3.4597	3.3205	NA	24.2403	28.0401	34.1809	19.1199	13.3997	2.29078	75.0742	91.6522	95.8732	79.7625	20.1327	21.1535	34.8392	60.5962
Koike_CLKBMAL1_P0490	NE_G047	4_NE047	intron	7.20555	48.8183	7.18942	31.9707	NA	0.16035	Mogat2	0.0518	0.1857	0.3678	0.6867	0.0984	0.3124	0	0	0.05	0.1015	0.0699	0	0.1313	0.0188	0	0.0131	0	0	0.0155	0.0286	0	0.0595	0.1795	0.1757	NA	14.9916	25.2731	31.56	16.2631	11.9108	1.35364	15.0148	45.8261	37.2551	40.2369	4.73429	5.92939	34.8392	53.0216
Koike_CLKBMAL1_P0517	NE_G048	4_NE048	intron	7.91938	58.7838	5.96937	33.0374	NA	0.145942	AK002866	0.1163	0.1114	0	0.2888	0	0.0686	0.1905	0	0.2245	0.2077	0.4226	0.1209	0	0	0.1296	0	7.2774	6.0782	0	0	0.0074	0.0753	6.4575	5.1778	NA	23.1384	30.98	29.4305	18.4851	9.74523	3.41881	27.0267	45.8261	80.2417	46.943	12.6248	10.5768	43.549	60.5962
Koike_CLKBMAL1_P0525	NE_G049	4_NE049	intron	6.88291	60.0098	3.80387	44.7243	NA	0.04615	Lmod3	0	0.0681	0.036	0.0732	0.1551	0.0411	0.1127	0.0676	0	0	0	0	0.0517	0.0454	0	0.0473	0.1405	0.0689	0	0.12	0	0	0.1061	0.111	NA	34.1567	44.1724	20.9263	16.2258	8.30149	4.11298	33.0326	38.5356	42.9866	40.2369	12.6248	21.1535	52.2587	22.7236
Koike_CLKBMAL1_P0526	NE_G050	4_NE050	intron	5.35174	62.4431	4.21863	38.4753	NA	0.1542	Bmper	0.0975	0.0401	0.2036	0.1326	0.1349	0.098	0.1589	0.2665	0.2352	0.122	0.2015	0.1596	0.1184	0.0964	0.1064	0.1284	2.0703	3.1084	0.0514	0.0354	0.0724	0.1941	2.1099	4.1842	NA	28.6476	37.502	19.8206	16.0951	7.08334	2.30813	45.0445	42.0073	54.4497	30.1777	11.6684	13.2209	69.6783	68.1707
Koike_CLKBMAL1_P0546	NE_G051	4_NE051	intergenic-10kbless	8.02425	58.0673	2.74851	36.4227	NA	0.01405	Olfml2a	0	0.1241	0	0	0	0.0381	0	0	0	0	0	0.0064	0	0.0426	0	0.0439	7.3699	9.1785	0.0818	0	0	0	6.9922	7.5645	NA	37.2619	31.7952	15.3978	11.7072	8.86545	4.39065	36.9456	29.8564	34.3893	43.59	15.781	23.7977	17.4196	0
Koike_CLKBMAL1_P0547	NE_G052	4_NE052	intron	5.63658	37.198	3.90453	20.0967	NA	0.0387083	Meig1	0	0.1517	0.0828	0	0	0	0	0	0	0.23	0	0	0	0.1304	0.1309	0.0794	11.0243	9.5962	0	0	0.3009	0	10.7873	8.835	NA	19.8329	27.4719	19.0425	8.62636	2.97771	3.43616	33.0326	45.8261	34.9104	32.8195	7.89049	21.2336	34.8392	7.57453
Koike_CLKBMAL1_P0560	NE_G053	4_NE053	intron	6.85586	53.439	5.57846	34.8809	NA	0.319067	Gpc6	0.5103	0.2919	0.2591	0.2223	0.4828	0.2308	0.1925	0.6269	0.2564	0.3553	0.1959	0.2046	0.148	0.1839	0.1943	0.2039	1.5567	3.3701	0.3079	0.2696	0.2132	0.1242	3.626	2.6928	NA	23.1384	26.0884	25.4855	18.4851	12.1139	6.29963	36.0356	42.0073	45.8524	43.59	18.9372	18.5093	0	15.1491
Koike_CLKBMAL1_P0576	NE_G054	4_NE054	TSS	6.36903	33.4666	4.24545	22.6753	NA	0.817133	Rras	0.6217	0.554	1.1915	1.2918	1.4766	0.9753	1.1274	0.6556	0.143	1.073	0.3877	0.308	10.4129	11.1898	10.3581	8.3877	2.245	2.9122	11.5587	7.5068	8.1642	10.7052	2.8169	4.0208	NA	27.5457	21.1968	18.9196	20.3896	9.67755	3.31468	30.0297	24.5332	54.4497	43.2851	7.89049	18.5093	87.0979	30.2981
Koike_CLKBMAL1_P0591	NE_G055	4_NE055	TSS	5.92082	64.1844	3.10773	27.6288	NA	0.483967	Wbscr25	0.9828	0.2867	0.6387	0.3218	0.8537	0.7494	0.28	0.2809	0.4252	0.122	0.0807	0.7857	0.0664	0.0708	0.02	0.0091	12.4124	13.4308	0.0254	0.0167	0.0269	0.0065	7.2778	8.5403	NA	27.5457	25.199	15.3705	3.69701	7.44427	2.22136	30.0297	53.4638	48.7182	37.1886	9.46859	21.1535	87.0979	15.1491
Koike_CLKBMAL1_P0610	NE_G056	4_NE056	intergenic-10kbless	6.87732	39.5806	3.26435	31.7912	NA	0.0215417	Alpk2	0.0344	0	0.0637	0	0.0343	0.0182	0	0	0.0349	0.0354	0	0.0376	0	0.0201	0	0	0	0.1159	0	0	0	0	0.0703	0.1199	NA	29.7494	38.4161	17.2679	6.77785	3.24841	3.43616	6.00593	49.6449	34.3893	20.1184	7.89049	10.5768	55.426	45.4472
Koike_CLKBMAL1_P0620	NE_G057	4_NE057	TSS	7.08245	26.8931	4.12695	17.7064	NA	0.88415	Ccdc85b	1.087	0.8071	1.39	1.1297	1.012	1.0232	0.7138	0.7284	0.6163	0.7214	0.9209	0.46	1.0131	1.2371	0.6245	0.6299	16.1206	14.3249	1.1735	1.4167	0.8924	0.8348	11.2033	9.7281	NA	25.6092	22.8767	17.1178	14.0038	6.97055	2.86347	6.00593	30.5507	37.2551	16.7654	8.89474	2.64419	44.6047	15.149
Koike_CLKBMAL1_P0651	NE_G058	4_NE058	intron	2.89399	58.0962	3.60811	30.1949	NA	0.934825	Arhgef16	1.2185	1.2629	1.0103	1.3261	0.7735	1.5751	0.8214	0.6044	0.6203	0.5177	0.6411	0.8466	0.5077	0.6861	0.7093	0.902	0.4784	0.067	1.4659	0.11	0.7701	0.7582	1.2106	0.3128	NA	30.7177	31.8693	18.4828	9.24253	4.46656	2.86347	39.0386	64.9203	20.0604	30.1777	12.6248	23.7977	60.9686	60.5962
Koike_CLKBMAL1_P0652	NE_G059	4_NE059	TTS	6.52566	55.075	4.43414	29.577	NA	0.151142	Aldoc	0.32	0.0174	0.4554	0.1674	0.4404	0.0512	0.0868	0	0.1073	0.1318	0	0.036	3.7295	5.9687	4.3	3.8986	0.3232	0.0989	5.0914	3.9588	6.8199	2.2306	0.2768	0.4878	NA	28.7477	20.3815	19.7523	12.3234	10.422	3.33204	21.0208	38.1884	42.9866	33.734	12.6248	30.5284	60.9686	53.0217
Koike_CLKBMAL1_P0654	NE_G060	4_NE060	intron	6.22789	63.5296	3.7869	36.8116	NA	0.332483	Cln6	0.2344	0.2408	0.6081	0.9388	0.3249	0.2736	0.1927	0.4072	0.1648	0.3331	0.1791	0.0923	1.0826	1.0785	0.5963	0.571	1.3572	1.1589	1.2686	0.8558	0.9377	0.8756	1.1649	0.8287	NA	27.0449	29.3494	17.3635	13.0889	7.89544	5.72694	38.3106	42.0073	22.9262	43.59	12.6248	10.5768	113.227	75.7452
Koike_CLKBMAL1_P0692	NE_G061	4_NE061	intergenic-10kbless	6.87972	60.2941	4.1997	30.4549	NA	0.00735833	Ptgfr	0	0	0.018	0.0365	0	0	0.0338	0	0	0	0	0	0.0258	0.1228	0	0.0236	2.1012	2.1351	0	0.0299	0	0	1.481	2.4357	NA	27.3454	27.2495	22.264	12.3234	14.8885	3.43616	42.0415	78.5755	49.5866	57.0023	6.98189	18.5093	17.4196	37.8726
Koike_CLKBMAL1_P0696	NE_G062	4_NE062	TSS	2.93955	25.4015	3.98422	27.3214	NA	0.409417	Ccdc38	0.553	0.3339	0.4533	0.1468	0.4019	0.7544	0.3819	0.3371	0.3115	0.3569	0.2573	0.625	1.035	0.5225	0.6888	0.4367	0.6445	0.8539	0.5187	0.484	0.4095	0.647	2.1304	0.5438	NA	22.504	28.7565	13.8143	10.1574	7.35404	1.71808	30.3027	26.9633	11.9842	16.7654	12.0988	5.28838	34.8392	7.57453
Koike_CLKBMAL1_P0699	NE_G063	4_NE063	intron	3.80177	60.531	3.58075	25.0898	NA	0.003875	Nxph4	0	0	0	0.0465	0	0	0	0	0	0	0	0	0	0	0	0	0	0	0	0	0	0	0	0	NA	20.9348	30.1647	11.8214	11.091	3.72214	3.88738	48.0475	57.2826	31.5235	33.5307	15.781	29.0861	60.9685	68.1707
Koike_CLKBMAL1_P0701	NE_G064	4_NE064	intron	5.17985	48.3562	4.50754	15.5702	NA	0.0152583	Wif1	0	0	0	0.0333	0.0806	0.0341	0	0.0351	0	0	0	0	0.2605	0	0.1712	0.0492	1.2408	1.677	0	0.0272	0.0862	0.1241	1.2841	2.8628	NA	25.3421	22.8273	18.7285	10.4749	2.23328	2.86347	48.0475	57.2826	54.4497	37.087	12.6248	21.1535	43.549	30.2981
Koike_CLKBMAL1_P0703	NE_G065	4_NE065	TSS	4.29591	101.871	4.49467	32.7829	NA	0.448	Trim45	0.6896	0.2953	0.4425	0.3819	0.4144	0.5494	0.4317	0.4928	0.3626	0.2343	0.6684	0.4131	0.1338	0.164	0.1463	0.2222	2.8572	3.7813	0.1161	0.0955	0.1169	0.1684	3.8469	3.8567	NA	28.4138	16.824	22.5234	15.0868	8.1887	5.15424	63.0623	72.558	54.4497	73.7676	26.3495	56.9703	52.2588	45.4472
Koike_CLKBMAL1_P0726	NE_G066	4_NE066	intron	7.59812	28.2455	4.46997	27.6865	NA	0.161342	Sgip1	0.1373	0.1247	0.1759	0.2499	0.1893	0.1569	0.1464	0.2292	0.0724	0.0817	0.1345	0.2379	0.0019	0.0114	0.0194	0.0388	7.1678	8.4141	0.0274	0.0268	0.0166	0.0192	8.2424	7.901	NA	20.6677	27.7189	20.2028	12.3234	9.20383	4.58155	27.0267	13.4238	40.2077	35.5629	12.0031	16.8267	49.3555	53.0217
Koike_CLKBMAL1_P0728	NE_G067	4_NE067	intron	4.3584	48.9787	2.6217	24.184	NA	0.159608	E130114P18Rik	0.1547	0.3842	0.0974	0.2502	0.1153	0.1529	0.0959	0.1453	0.0947	0.1117	0.17	0.143	0.0184	0.0405	0.0258	0.0208	12.5789	8.9394	0.025	0.034	0.0297	0.0233	8.9166	9.3769	NA	33.2218	26.6319	12.6131	14.1719	7.44427	5.15424	39.0386	34.3696	51.584	6.70615	5.92982	10.5768	43.549	30.2981
Koike_CLKBMAL1_P0735	NE_G068	4_NE068	intergenic-10kbless	3.37213	64.3327	3.18198	38.4997	NA	0.0685167	2210010C17Rik	0.0873	0.231	0	0.082	0.0239	0.1381	0	0.1431	0.0442	0	0	0.0726	0.058	0.2544	0.1532	0.1061	0	0	0.4137	0.1113	0.5045	0.1052	0	0	NA	37.4622	46.4699	18.0187	6.77785	1.48885	4.58155	63.0623	63.3002	34.3893	14.53	4.73429	2.64419	60.9686	37.8726
Koike_CLKBMAL1_P0737	NE_G069	4_NE069	TSS	3.40819	45.1907	4.0941	19.4464	NA	0.927775	AK047309	0.918	1.2717	2.5572	0.2013	0.8533	1.0165	0.1866	1.26	1.5398	0.52	0.2056	0.6033	0.2848	0	0	0	1.8393	2.3639	0	0	0.144	0.0179	2.5306	2.3035	NA	24.2403	23.9143	20.9672	11.091	10.9183	4.28653	63.0623	57.2826	61.8313	60.3553	18.9372	49.7588	15.572	22.7236
Koike_CLKBMAL1_P0761	NE_G070	4_NE070	intron	7.87624	57.4552	6.55092	30.4929	NA	0.0106417	Rbm44	0	0	0.0418	0.0425	0	0	0	0	0	0	0.0434	0	0	0.0185	0	0.0166	59.6737	40.4475	0	0	0	0	28.0719	31.3281	NA	18.3638	26.7307	22.578	22.1821	11.7304	5.22366	24.0237	38.1884	45.8524	50.2961	18.9372	17.067	69.6783	53.0217
Koike_CLKBMAL1_P0770	NE_G071	4_NE071	intron	8.21042	65.1097	6.16272	25.9636	NA	0.432117	AK046388	0.3671	0.2409	0.2124	0.8486	0.6091	0.602	0.5597	0.3985	0.3256	0.1887	0.4791	0.3537	0.1831	0.107	0.1032	0	7.2071	2.6433	0	0.0708	0.1106	0	7.7041	2.2628	NA	21.1017	23.6426	24.7757	20.5016	4.46656	6.64672	21.0208	57.2826	60.1813	70.4146	7.89049	15.8651	25.8654	53.0217
Koike_CLKBMAL1_P0782	NE_G072	4_NE072	intron	2.80755	40.839	3.32948	31.2512	NA	0.372925	ADAM22	0.4436	0.2639	0.338	0.5813	0.3318	0.5166	0.3337	0.3484	0.3252	0.2998	0.2538	0.439	0.0221	0.0194	0.0224	0.0308	7.3759	6.9497	0.0283	0.0749	0.0336	0.0313	3.4865	4.9001	NA	30.6509	35.8715	16.6536	4.92935	2.97771	2.29078	43.7705	30.5507	28.6578	0	4.73429	7.93257	34.8392	15.1491
Koike_CLKBMAL1_P0800	NE_G073	4_NE073	intron	6.56959	39.9852	3.59344	31.1674	NA	0.0593917	Gdpd4	0	0.0342	0.0527	0	0.0744	0.12	0	0.1483	0.1175	0	0.0724	0.0932	0	0	0	0	0	0	0	0	0	0	0	0	NA	24.2403	33.8704	15.7664	4.6306	5.77495	1.44041	30.0297	15.2754	40.1209	20.1184	4.73429	0	8.7098	37.8726
Koike_CLKBMAL1_P0822	NE_G074	4_NE074	intron	8.96685	34.2162	3.18761	15.5822	NA	0.123658	Praf2	0	0.1027	0.3771	0.0968	0.063	0.1401	0.1118	0.0533	0.2106	0	0.0416	0.2869	2.5279	1.0493	2.4714	2.0024	2.8144	2.6996	1.9272	1.3371	1.74	1.6763	2.9572	1.507	NA	23.1384	15.49	14.415	6.57246	6.69985	1.71808	12.0119	15.2754	34.3893	23.4715	14.6811	8.81396	52.2587	23.1826
Koike_CLKBMAL1_P0829	NE_G075	4_NE075	exon	6.005	44.7532	4.22897	21.1715	NA	0.355242	2610002D18Rik	0.4306	0.8407	0.5432	0.258	0.4171	0.6425	0.1196	0.3219	0.3087	0.1411	0.1318	0.1077	0	0.3779	0	0	0	0	0.0777	0.1352	0.1846	0.0663	0.2025	0.0682	NA	20.9348	23.6426	15.3159	9.24253	6.33891	0.572694	21.0208	45.1318	31.5235	29.9745	7.89049	15.8651	43.549	7.57453
Koike_CLKBMAL1_P0853	NE_G076	4_NE076	TTS	5.58275	90.2479	4.61274	33.0951	NA	0.0252917	Lgi2	0.0871	0	0	0.0818	0	0	0.1346	0	0	0	0	0	0	0.0507	0	0	0.1524	0	0.1219	0	0	0.0525	0	0	NA	20.9348	31.1035	23.8748	10.4749	6.69985	5.15424	54.0534	61.1015	34.3893	70.4146	11.8596	26.4419	52.2588	14.2309
Koike_CLKBMAL1_P0867	NE_G077	4_NE077	intron	6.60814	73.1299	5.32653	27.9139	NA	0.0107917	Clic6	0	0.0816	0	0	0	0	0	0	0	0.0479	0	0	0.0018	0	0.0465	0	21.8399	21.1059	0.0264	0	0.0608	0.0681	19.0937	21.8968	NA	20.9348	26.0884	27.2055	12.9395	5.21099	2.29078	45.0445	72.558	44.2024	70.2113	11.0467	5.28838	165.486	112.241
Koike_CLKBMAL1_P0901	NE_G078	4_NE078	intron	8.31959	32.4307	3.94508	25.7048	NA	0.0656417	Tectb	0.0671	0.1118	0.1479	0	0	0.0674	0.1113	0.0555	0.2267	0	0	0	0	0.0745	0	0	19.6452	9.6904	0.1482	0.0493	0	0	9.2757	7.9949	NA	32.6208	36.588	23.0967	13.5557	9.33918	2.29078	27.3907	38.1884	28.6578	46.943	13.3899	11.6184	86.0422	60.5962
Koike_CLKBMAL1_P0933	NE_G079	4_NE079	TSS	3.8749	46.1907	3.87387	17.9712	NA	0.0980167	AK043789	0.1382	0.1209	0.12	0	0	0.0492	0.1521	0.2401	0.2803	0	0	0.0754	0	0	0	0.084	4.0429	3.0193	0	0.1066	0	0	3.0865	2.9769	NA	20.4339	18.924	18.7968	4.70529	6.4517	0.572694	36.0356	40.1557	39.2524	23.4715	6.31239	26.4419	78.3881	22.7236
[truncated: 212 more rows]
[truncated: 51 more columns]
